# Supplementary material for: Ciglitazone—a human PPARγ agonist—disrupts dorsoventral patterning in zebrafish
Source: PeerJ journal article supplement (doi:10.7717/peerj.8054), 2019-11-13
Supplement: Cheng-et-al-PeerJ-Figures-S1-S5.pdf [file Cheng-et-al-PeerJ-Figures-S1-S5.pdf]

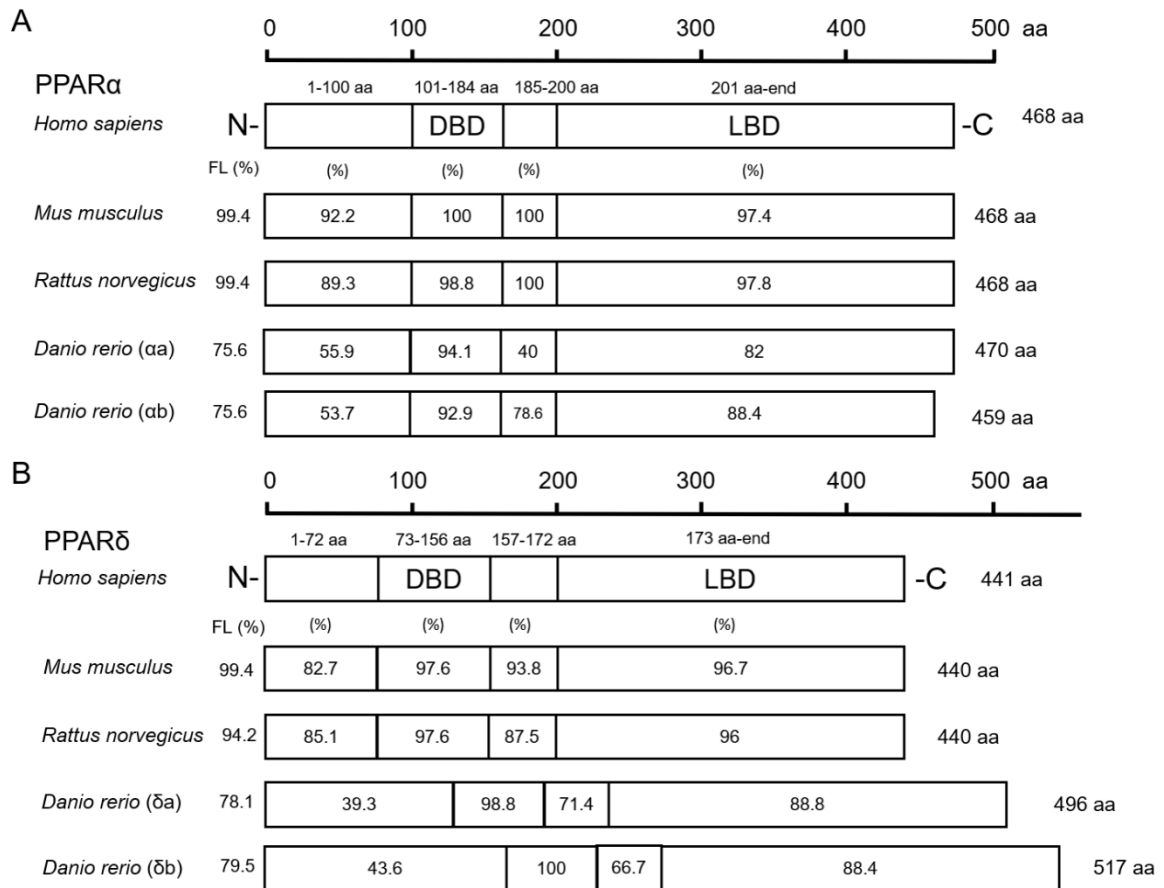

**Figure S1.** PPAR $\alpha$  (A) and PPAR $\delta$  (B) sequence similarity relative to human amino acid sequences. Percent similarity of mouse, rat, and zebrafish PPAR $\alpha$  (A) and PPAR $\delta$  (B) relative to human PPAR $\alpha$  and PPAR $\delta$ ; FL = full length; DBD = DNA binding domain; and LBD = ligand binding domain.

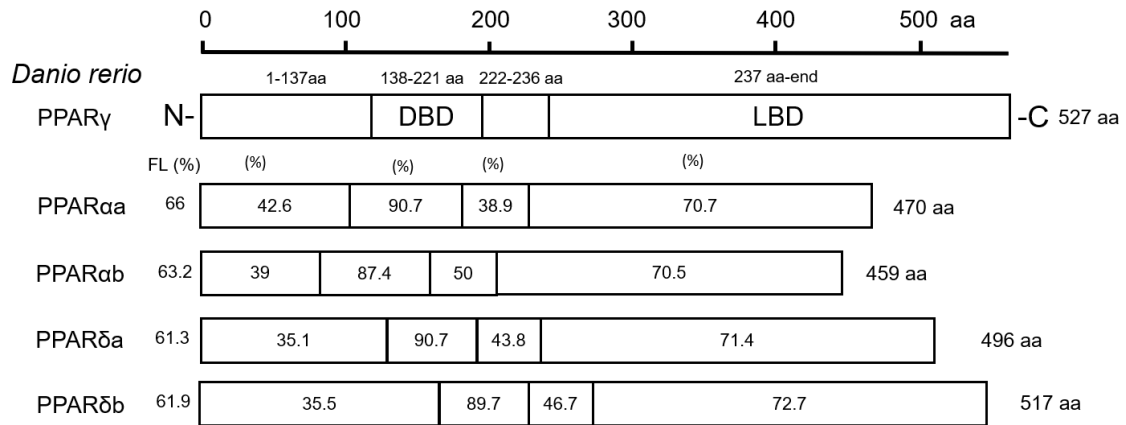

**Figure S2.** Percent similarity of zebrafish PPAR $\alpha$  (a and b) and PPAR $\delta$  (a and b) relative to PPAR $\gamma$ ; FL = full length; DBD = DNA binding domain; and LBD = ligand binding domain (B).

|              |     |                                                                                                     |     |                                                                                                          |
|--------------|-----|-----------------------------------------------------------------------------------------------------|-----|----------------------------------------------------------------------------------------------------------|
| Homo_sapiens | 17  | FTDTLS-ANISQEMTMVDTEMPF-WPTNFGISSVDLS-VMEDHSHSFDIK                                                  | 63  |                                                                                                          |
| Danio_erio   | 6   | F--SVQKASLSAD--MVDQT-FGWPVGFGLSALELEE-LEDDTHSLDIK                                                   | 49  |                                                                                                          |
| Homo_sapiens | 64  | PFTTVDFSSIS-----T--P--HY-EDIP-F----TR----T-DPV                                                      | 89  |                                                                                                          |
| Danio_erio   | 50  | PFSTLDYSSISGIDYENNPQTQNDPTPHMM-DLTHMYSYRTQENYRTHEPI                                                 | 98  |                                                                                                          |
| Homo_sapiens | 90  | VADYK-----YDLKLQE--Y--QS-A--IKVEPASPPYSEKTL-YNK-                                                    | 125 |                                                                                                          |
| Danio_erio   | 99  | ---YRPEHSSYS-P-EENTYRAQQIQNSIKLEPESPPQFAENS-VSFSKT                                                  | 142 |                                                                                                          |
| Homo_sapiens | 126 | PHEEPSNS-L-MAI <span style="background-color: #ADD8E6;">ECRVCGDKASGFHYGVHACEGCKGFFRRTIRLKLIV</span> | 173 | <span style="background-color: #ADD8E6; display: inline-block; width: 15px; height: 10px;"></span> = DBD |
| Danio_erio   | 143 | P-EDPSSSSLN--I <span style="background-color: #ADD8E6;">ECRVCGDKASGFHYGVHACEGCKGFFRRTIRLKLIV</span> | 189 |                                                                                                          |
| Homo_sapiens | 174 | <span style="background-color: #FFFF00;">DRCDLNCRIHKKSRNKQYCRFQKCLAVGMSHNAIRFGRMPQAEKEKLA</span>    | 223 | <span style="background-color: #FFFF00; display: inline-block; width: 15px; height: 10px;"></span> = LBD |
| Danio_erio   | 190 | <span style="background-color: #FFFF00;">DHCDLHCRHKKSRNKQYCRFQKCLMVGMSHNAIRFGRMPQAEKEKLA</span>     | 239 |                                                                                                          |
| Homo_sapiens | 224 | EISSDIDQLNPES <span style="background-color: #90EE90;">ADLRALAKHLYDSYIK-SFPLTKAKARAILTGKTTDK</span> | 272 | <span style="background-color: #90EE90; display: inline-block; width: 15px; height: 10px;"></span> = LBP |
| Danio_erio   | 240 | EFSSDVMHMPES <span style="background-color: #90EE90;">ADLRALARHLYESYLKY-FPLTKAKARAILSGKTSDN</span>  | 288 |                                                                                                          |
| Homo_sapiens | 273 | SPFVIYDMNSLM-MGEDK-IK-FKHITPLQE-Q-SK--EV---AIRIQ                                                    | 311 |                                                                                                          |
| Danio_erio   | 289 | APFVIHDMKSLVE-GE-QMINC-RYM-PLHEHRRSDLG-IMHEVELRFEH                                                  | 333 |                                                                                                          |
| Homo_sapiens | 312 | <span style="background-color: #90EE90;">G-CQ-FRSVEAVQEQEITEYAKSIPGFVNLDLNDQVTLKYGVI-EI-I-VT</span> | 356 |                                                                                                          |
| Danio_erio   | 334 | <span style="background-color: #90EE90;">SY-QS-RSAEAISEVTEFAKSIPGFINLDLNDQVTLKYGVI-EVMTI--</span>   | 378 |                                                                                                          |
| Homo_sapiens | 357 | <span style="background-color: #90EE90;">MLAS-LMINKDGVLT-S-EGQ-GFMTREFLKSRLKPF-GDMEPKFEFAVKF</span> | 402 |                                                                                                          |
| Danio_erio   | 379 | <span style="background-color: #90EE90;">MI-SPLMINKDGLTSY-GQI-FMTREFLKSRLKPF-C-EMMEPKFEFSIKF</span> | 424 |                                                                                                          |
| Homo_sapiens | 403 | <span style="background-color: #90EE90;">NALELDDSDLAIFIAVIIISGDRPGLLNKPIEDIQDNLQALELQLKLN</span>    | 452 |                                                                                                          |
| Danio_erio   | 425 | <span style="background-color: #90EE90;">NMLELDDCDMALFLAVIISGDRPGLLDVVKPIEDLQETVLHSLLELQLKIN</span> | 474 |                                                                                                          |
| Homo_sapiens | 453 | <span style="background-color: #90EE90;">HPES-SQLFAKLLQKMTDLRQIVTEVQLLQVIKKTETDMSLHPLLQEIY</span>   | 501 |                                                                                                          |
| Danio_erio   | 475 | <span style="background-color: #90EE90;">HPDSL-QLFAKVLQKMTDLRQLVTDVQLIQMMKETEADWSLHPLLQEIY</span>   | 523 |                                                                                                          |
| Homo_sapiens | 502 | <span style="background-color: #FFFF00;">KDLY</span> 505                                            |     |                                                                                                          |
| Danio_erio   | 524 | <span style="background-color: #FFFF00;">RDLY</span> 527                                            |     |                                                                                                          |

**Figure S3.** Sequence alignment between human and zebrafish PPAR $\gamma$ ; DNA binding domain (DBD) is highlighted in blue, ligand binding domain (LBD) is highlighted in yellow, and amino acid residues in the ligand binding pocket (LBP) involved with thiazolidinediones binding are highlighted in green.

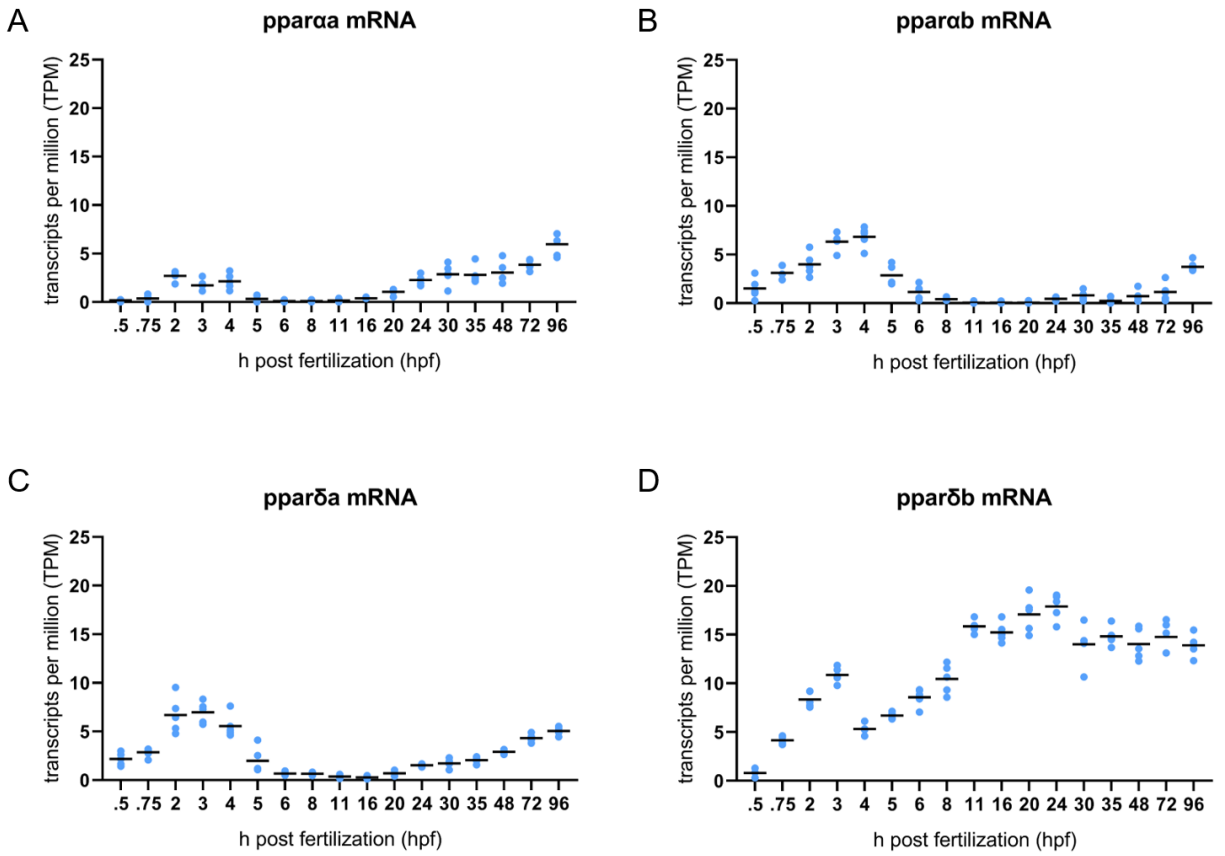

**Figure S4.** Abundance of ppar $\alpha$  (A), ppar $\beta$  (B), ppar $\delta$ a (C), and ppar $\delta$ b (D) mRNA within whole zebrafish embryos from 0.75 hpf to 96 hpf.

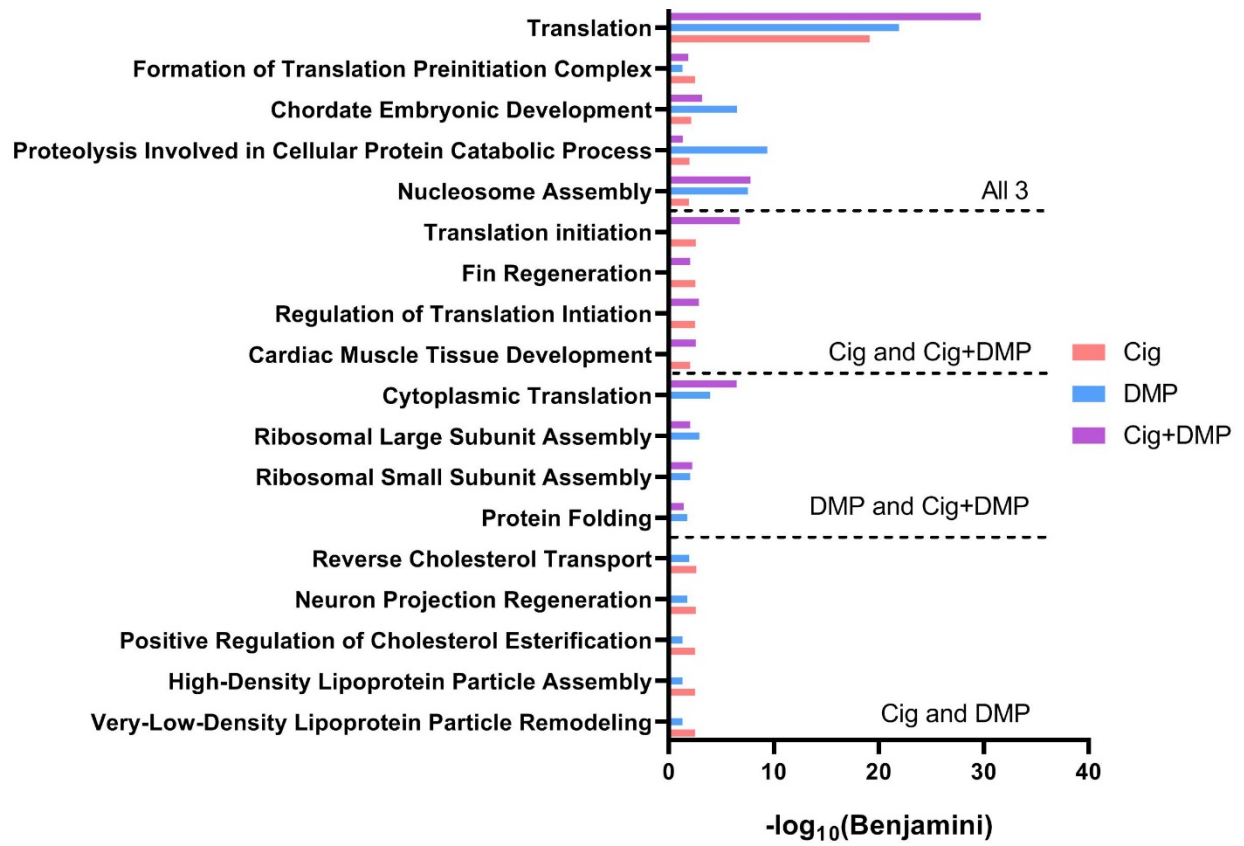

**Figure S5.** Significant (Benjamini p-value < 0.05) biological processes shared between or among treatment groups.
