# Supplementary material for: Ciglitazone—a human PPARγ agonist—disrupts dorsoventral patterning in zebrafish
Source: PeerJ. 2019 Nov 13;7:e8054. doi: 10.7717/peerj.8054 (PMC6858815; doi:10.7717/peerj.8054)
Supplement: Supplemental Information 2 [file peerj-07-8054-s002.xlsx]

## Sheet: Table S1-Run Metrics (mRNA-seq)
Date	2019-03-25
Yield	3.19 Gbp
PhiX Aligned (%)	0.07
PhiX Error Rate (%)	1.69
%≥Q30	87.17
Density (K/mm^2)	291±4
Cluster Passing Filter (%)	80.36±0.64
Reads	49011782
Reads Passing Filter	39388903
no of libraries	16

## Sheet: Table S2-12.5 uM Cig
Ensemble ID	baseMean	log2FoldChange	lfcSE	stat	pvalue	padj	"=-LOG10" Padj	Gene Symbol
ENSDARG00000037789	264.387	-5.39194	0.250851	-21.4946	1.74963e-102	2.18739e-98	97.6601	pvalb1
ENSDARG00000041490	714.798	3.422	0.19977	17.1297	8.91193e-66	5.57085e-62	61.2541	LOC568656
ENSDARG00000068457	132.509	-4.51145	0.265681	-16.9807	1.14148e-64	4.75694e-61	60.3227	tnnt3b
ENSDARG00000058358	848.711	2.10319	0.132147	15.9156	4.93825e-57	1.54345e-53	52.8115	krt8
ENSDARG00000101334	159.488	3.39963	0.21764	15.6205	5.28238e-55	1.32081e-51	50.8792	ctsc
ENSDARG00000018404	451.72	2.00435	0.135795	14.7601	2.65006e-49	5.52185e-46	45.2579	krt18
ENSDARG00000059227	328.89	2.44014	0.178216	13.692	1.13334e-42	2.02415e-39	38.6938	fabp1b.1
ENSDARG00000036834	519.233	1.93788	0.14617	13.2577	4.07366e-40	6.36612e-37	36.1961	cki; krt92
ENSDARG00000013968	380.799	2.12029	0.162102	13.08	4.28344e-39	5.95018e-36	35.2255	psap
ENSDARG00000070835	692.483	-1.89575	0.14618	-12.9686	1.84386e-38	2.3052e-35	34.6373	tnnc2
ENSDARG00000038559	606.461	1.77029	0.140373	12.6114	1.82833e-36	2.07798e-33	32.6824	h1f0
ENSDARG00000033999	68.5144	4.29404	0.347998	12.3393	5.56608e-35	5.79893e-32	31.2367	cyp26a1
ENSDARG00000018961	161.874	2.14396	0.174592	12.2799	1.16196e-34	1.11745e-31	30.9518	gtpbp4
ENSDARG00000067995	68.702	-3.43281	0.285158	-12.0383	2.23567e-33	1.99645e-30	29.6997	myhz1.2
ENSDARG00000001721	244.848	1.80063	0.15121	11.9081	1.07344e-32	8.94679e-30	29.0483	oc90
ENSDARG00000015866	473.986	1.99756	0.176141	11.3407	8.25067e-30	6.44687e-27	26.1907	apoa2
ENSDARG00000016771	514.926	2.02859	0.18164	11.1682	5.83515e-29	4.29123e-26	25.3674	-
ENSDARG00000100833	163.556	2.65546	0.238182	11.1489	7.25259e-29	5.03732e-26	25.2978	LOC100536033
ENSDARG00000105590	114.661	2.31905	0.208706	11.1116	1.10205e-28	7.25147e-26	25.1396	si:cabz01007794.1
ENSDARG00000079376	133.465	2.85532	0.259175	11.017	3.16524e-28	1.97859e-25	24.7036	zgc:174153
ENSDARG00000063921	580.5	-1.56962	0.142921	-10.9825	4.64081e-28	2.76283e-25	24.5586	ND5
ENSDARG00000068507	39.6831	-4.86419	0.446628	-10.8909	1.27325e-27	7.23551e-25	24.1405	crybb1
ENSDARG00000063899	1432.17	-1.41093	0.130018	-10.8518	1.95438e-27	1.06233e-24	23.9737	ND2
ENSDARG00000105177	493.684	-1.28075	0.119409	-10.7257	7.70848e-27	4.01548e-24	23.3963	ilf3b
ENSDARG00000070546	67.6756	3.34044	0.314614	10.6176	2.46837e-26	1.23438e-23	22.9085	msgn1
ENSDARG00000089124	675.878	-1.84913	0.174433	-10.6008	2.954e-26	1.42042e-23	22.8476	LOC100334599
ENSDARG00000036239	172.106	1.98301	0.192814	10.2846	8.26974e-25	3.8292e-22	21.4169	gatm
ENSDARG00000071331	46.161	-3.16909	0.308813	-10.2622	1.0435e-24	4.65923e-22	21.3317	-
ENSDARG00000094559	98.5628	3.3319	0.329654	10.1073	5.12864e-24	2.21098e-21	20.6554	zgc:174855
ENSDARG00000013430	746.51	1.74738	0.174432	10.0176	1.27608e-23	5.14632e-21	20.2885	bhmt
ENSDARG00000075527	55.7567	3.36033	0.335402	10.0188	1.2603e-23	5.14632e-21	20.2885	si:dkey-269i1.3
ENSDARG00000096257	86.2594	-2.7555	0.277063	-9.94542	2.64065e-23	1.03167e-20	19.9865	-
ENSDARG00000037997	220.903	-2.11259	0.213019	-9.9174	3.4976e-23	1.32506e-20	19.8778	tubb5
ENSDARG00000063626	271.914	1.56763	0.15887	9.86741	5.76337e-23	2.11923e-20	19.6738	ddx21
ENSDARG00000040295	793.148	1.51842	0.154688	9.81604	9.60399e-23	3.43054e-20	19.4646	apoeb
ENSDARG00000053973	644.649	1.75552	0.179269	9.7927	1.21015e-22	4.2026e-20	19.3765	fetub
ENSDARG00000020850	6017.25	1.02605	0.105804	9.69761	3.08643e-22	1.04288e-19	18.9818	eef1a1l1; eef1a1l2
ENSDARG00000071113	251.369	-1.34565	0.138865	-9.69035	3.31393e-22	1.09028e-19	18.9625	xirp2a
ENSDARG00000060977	116.562	1.90064	0.196812	9.65715	4.5844e-22	1.46959e-19	18.8328	zgc:153018
ENSDARG00000012076	905.059	2.78199	0.289363	9.61419	6.96528e-22	2.177e-19	18.6621	apoa1a
ENSDARG00000053684	378.359	1.89311	0.197172	9.60133	7.89168e-22	2.40639e-19	18.6186	aldob
ENSDARG00000015822	86.5714	2.48554	0.259223	9.58841	8.94493e-22	2.60861e-19	18.5836	sesn3
ENSDARG00000041703	163.858	1.57388	0.164149	9.5881	8.97217e-22	2.60861e-19	18.5836	rrbp1b
ENSDARG00000061120	495.578	2.00432	0.209517	9.5664	1.10698e-21	3.14532e-19	18.5023	slc43a2b
ENSDARG00000100452	337.052	1.42783	0.149492	9.55116	1.28256e-21	3.56324e-19	18.4482	nop53
ENSDARG00000063914	434.762	-1.29757	0.137516	-9.43574	3.88228e-21	1.05514e-18	17.9767	ND3
ENSDARG00000002768	138.312	-4.02933	0.428922	-9.3941	5.77097e-21	1.53508e-18	17.8139	pvalb2
ENSDARG00000094324	279.884	1.43708	0.154084	9.3266	1.09321e-20	2.84736e-18	17.5456	efemp2a
ENSDARG00000023656	469.321	1.40041	0.151889	9.21995	2.97241e-20	7.58389e-18	17.1201	he1a
ENSDARG00000039173	219.701	2.07203	0.227611	9.10338	8.75643e-20	2.18946e-17	16.6597	ctslb
ENSDARG00000070844	329.014	1.58413	0.17418	9.0948	9.4757e-20	2.32285e-17	16.634	gamt
ENSDARG00000007697	95.8834	-2.53927	0.27931	-9.09123	9.79242e-20	2.35432e-17	16.6281	fabp7a
ENSDARG00000079009	132.484	1.75761	0.19354	9.08137	1.07218e-19	2.52913e-17	16.597	abca1b
ENSDARG00000021242	129.299	1.78247	0.197248	9.03671	1.61451e-19	3.7379e-17	16.4274	mvp
ENSDARG00000067990	484.699	-2.81866	0.312146	-9.02996	1.7174e-19	3.90382e-17	16.4085	myhz1.1
ENSDARG00000007795	127.465	1.95598	0.216726	9.02515	1.79457e-19	4.00637e-17	16.3972	cst3
ENSDARG00000095863	731.432	3.24307	0.363262	8.92763	4.35225e-19	9.54594e-17	16.0202	afp4
ENSDARG00000059053	72.1654	2.52946	0.28469	8.88498	6.39299e-19	1.37802e-16	15.8607	slc13a4
ENSDARG00000036292	53.4601	2.82341	0.319034	8.84988	8.76118e-19	1.85648e-16	15.7313	cdx4
ENSDARG00000062262	42.3675	2.95741	0.334978	8.82868	1.05914e-18	2.20689e-16	15.6562	ednrab
ENSDARG00000022767	1576.51	1.2953	0.148529	8.72084	2.76154e-18	5.65979e-16	15.2472	apobb.1
ENSDARG00000053457	1018.62	1.07438	0.123229	8.71855	2.81791e-18	5.68218e-16	15.2455	rpl23
ENSDARG00000028213	3155.28	-1.06656	0.12262	-8.69811	3.37453e-18	6.69657e-16	15.1741	-
ENSDARG00000074667	138.536	2.24219	0.258801	8.66376	4.56465e-18	8.91676e-16	15.0498	akt1s1
ENSDARG00000099351	32.4277	3.65554	0.424595	8.60947	7.3398e-18	1.41172e-15	14.8502	igfbp1a
ENSDARG00000023290	715.274	-1.01672	0.118276	-8.59616	8.24288e-18	1.5614e-15	14.8065	fabp3
ENSDARG00000014587	259.64	1.81863	0.21456	8.47607	2.32928e-17	4.34637e-15	14.3619	slc38a5b
ENSDARG00000032405	193.623	1.45619	0.172647	8.43445	3.32753e-17	6.11776e-15	14.2134	zgc:85975
ENSDARG00000101209	97.169	2.0911	0.248195	8.42522	3.60066e-17	6.52398e-15	14.1855	lamb1a
ENSDARG00000040442	50.7093	-2.50355	0.299069	-8.37114	5.70611e-17	1.01911e-14	13.9918	-
ENSDARG00000035602	59.081	2.30536	0.275803	8.35874	6.33899e-17	1.1162e-14	13.9523	dao.1
ENSDARG00000033539	107.185	1.9327	0.231443	8.35067	6.78782e-17	1.17863e-14	13.9286	paics
ENSDARG00000007329	38.9779	3.15432	0.379421	8.31353	9.28997e-17	1.591e-14	13.7983	tbx16
ENSDARG00000104814	35.4416	-3.19799	0.384894	-8.30874	9.67205e-17	1.63405e-14	13.7867	wu:fc46h12
ENSDARG00000041051	45.9221	2.60796	0.314669	8.28795	1.15214e-16	1.92054e-14	13.7166	mid1ip1a
ENSDARG00000008502	198.395	1.3152	0.159228	8.25985	1.45855e-16	2.39932e-14	13.6199	pno1
ENSDARG00000019122	748.087	1.28092	0.155424	8.24146	1.70119e-16	2.76212e-14	13.5588	he1b
ENSDARG00000098803	73.7418	2.18312	0.266037	8.2061	2.28497e-16	3.6624e-14	13.4362	cyp2aa8
ENSDARG00000020574	1826.06	-2.18573	0.267375	-8.17477	2.96442e-16	4.69129e-14	13.3287	atp2a1
ENSDARG00000045248	1408.77	0.891434	0.109439	8.14547	3.77797e-16	5.90402e-14	13.2289	h3f3d
ENSDARG00000011701	81.5594	2.1044	0.258624	8.1369	4.05519e-16	6.25902e-14	13.2035	ctsll
ENSDARG00000008494	82.1683	2.07438	0.25507	8.13258	4.20241e-16	6.40713e-14	13.1933	myl6
ENSDARG00000092170	1206.08	1.1532	0.142786	8.07642	6.66959e-16	1.00462e-13	12.998	apoc1
ENSDARG00000068478	118.348	1.99514	0.247122	8.0735	6.83116e-16	1.0167e-13	12.9928	gpx4a
ENSDARG00000018637	321.362	1.27113	0.157546	8.06835	7.12571e-16	1.04807e-13	12.9796	sec61g
ENSDARG00000011405	1123.77	1.05934	0.131531	8.05391	8.01908e-16	1.16575e-13	12.9334	rps9
ENSDARG00000040439	219.011	1.27518	0.158581	8.0412	8.89635e-16	1.27842e-13	12.8933	rsl24d1
ENSDARG00000061100	209.467	1.77874	0.221916	8.01539	1.09788e-15	1.55973e-13	12.8069	nars
ENSDARG00000007836	410.815	1.37348	0.171427	8.01206	1.12803e-15	1.58456e-13	12.8001	ctsla
ENSDARG00000063535	412.336	-1.42481	0.178537	-7.98048	1.4576e-15	2.02476e-13	12.6936	chd4a
ENSDARG00000099101	37.5873	-2.75689	0.348141	-7.91889	2.39644e-15	3.29234e-13	12.4825	gch2
ENSDARG00000042236	515.224	-0.91441	0.115717	-7.90215	2.74141e-15	3.72533e-13	12.4288	atrx
ENSDARG00000006019	153.859	1.46488	0.185428	7.90001	2.78883e-15	3.74902e-13	12.4261	tktb
ENSDARG00000036427	73.9946	1.90234	0.241019	7.8929	2.95242e-15	3.92671e-13	12.406	slc3a2a
ENSDARG00000092693	2043.27	1.00603	0.127888	7.86645	3.64832e-15	4.80119e-13	12.3187	tpt1
ENSDARG00000006766	281.012	1.1859	0.150808	7.86369	3.7297e-15	4.85715e-13	12.3136	snd1
ENSDARG00000102879	88.528	-1.66992	0.212575	-7.8557	3.97547e-15	5.12385e-13	12.2904	myt1b
ENSDARG00000020377	160.28	-1.35286	0.172912	-7.82397	5.11846e-15	6.49747e-13	12.1873	eif4g2a
ENSDARG00000070426	203.313	2.97736	0.380575	7.82331	5.14517e-15	6.49747e-13	12.1873	chac1
ENSDARG00000021113	532.738	-1.26928	0.162569	-7.80762	5.82759e-15	7.28565e-13	12.1375	ptmaa
ENSDARG00000036107	59.16	2.40597	0.309162	7.78225	7.12472e-15	8.81914e-13	12.0546	txnipa
ENSDARG00000006691	1150.73	0.915804	0.118184	7.74894	9.26643e-15	1.13577e-12	11.9447	rpl12
ENSDARG00000000563	2800.71	-0.979145	0.126598	-7.73431	1.03966e-14	1.26192e-12	11.899	-
ENSDARG00000086222	108.334	-1.53984	0.199531	-7.71726	1.18854e-14	1.42876e-12	11.845	nat16
ENSDARG00000063911	1384.68	-0.972764	0.12657	-7.68557	1.52317e-14	1.81358e-12	11.7415	ATP6
ENSDARG00000016598	76.5852	1.97724	0.258268	7.65577	1.92164e-14	2.26645e-12	11.6447	ckmt1
ENSDARG00000034273	31.3364	3.15577	0.414581	7.61194	2.70005e-14	3.15477e-12	11.501	sid4
ENSDARG00000016393	218.505	-1.22625	0.161169	-7.60847	2.77354e-14	3.21063e-12	11.4934	arf2b
ENSDARG00000037559	225.442	-1.1028	0.145642	-7.57202	3.67471e-14	4.2148e-12	11.3752	uba1
ENSDARG00000045980	240.869	1.16083	0.153356	7.56947	3.7475e-14	4.2592e-12	11.3707	cst14b.1
ENSDARG00000092807	4570.44	0.991261	0.131318	7.54854	4.40148e-14	4.95741e-12	11.3047	-
ENSDARG00000063917	1515.76	-1.08731	0.144251	-7.53762	4.78609e-14	5.34247e-12	11.2723	ND4
ENSDARG00000026842	202.993	-1.28088	0.170243	-7.52386	5.31828e-14	5.884e-12	11.2303	acin1b
ENSDARG00000070545	705.805	-1.07293	0.143335	-7.48548	7.12873e-14	7.81784e-12	11.1069	top1l
ENSDARG00000061052	355.286	-0.987268	0.131933	-7.48311	7.25864e-14	7.89109e-12	11.1029	nipblb
ENSDARG00000005230	336.352	0.983019	0.132226	7.43439	1.0505e-13	1.13218e-11	10.9461	ssr2
ENSDARG00000027249	591.677	0.912886	0.123274	7.40533	1.30829e-13	1.39797e-11	10.8545	btg1
ENSDARG00000102995	191.118	1.36324	0.184293	7.3971	1.39193e-13	1.47473e-11	10.8313	rbm24a
ENSDARG00000013961	78.9332	1.68614	0.229898	7.33429	2.22903e-13	2.34179e-11	10.6305	slc31a1
ENSDARG00000020956	46.111	2.43606	0.334312	7.28677	3.17484e-13	3.30765e-11	10.4805	pck2
ENSDARG00000102832	634.538	-1.21032	0.166381	-7.27435	3.48102e-13	3.59667e-11	10.4441	-
ENSDARG00000012944	97.5615	-2.11912	0.291775	-7.26286	3.78995e-13	3.88377e-11	10.4107	myhz2
ENSDARG00000090850	96.1345	1.79439	0.247114	7.26139	3.83144e-13	3.89437e-11	10.4096	serpina1l
ENSDARG00000006427	100.729	1.71227	0.236057	7.25363	4.05745e-13	4.09082e-11	10.3882	fabp2
ENSDARG00000055455	121.509	-1.5531	0.215135	-7.21919	5.22983e-13	5.23067e-11	10.2814	gpm6aa
ENSDARG00000102632	250.018	1.27688	0.177873	7.1786	7.04314e-13	6.98836e-11	10.1556	ubc
ENSDARG00000055216	261.901	-0.985278	0.137387	-7.17154	7.41608e-13	7.30046e-11	10.1366	tuba1c
ENSDARG00000036875	2442.09	0.788334	0.111416	7.07557	1.48831e-12	1.45366e-10	9.83754	rps12
ENSDARG00000032929	13.1486	-3.87922	0.548594	-7.07121	1.53585e-12	1.48846e-10	9.82726	cryba1l1
ENSDARG00000088449	132.817	1.55012	0.219348	7.06694	1.58388e-12	1.5232e-10	9.81724	wu:fb55g09
ENSDARG00000054058	248.033	2.44275	0.346169	7.05653	1.70716e-12	1.62923e-10	9.78802	h1fx
ENSDARG00000007708	423.376	0.959665	0.136356	7.03794	1.95103e-12	1.84786e-10	9.73333	nsa2
ENSDARG00000002988	25.734	-2.63958	0.376044	-7.01934	2.22915e-12	2.0954e-10	9.67873	tnnt2d
ENSDARG00000068401	180.98	1.17089	0.168262	6.95875	3.43305e-12	3.20298e-10	9.49445	yap1
ENSDARG00000020008	182.067	-1.20573	0.173547	-6.94761	3.71536e-12	3.4154e-10	9.46656	vcp
ENSDARG00000057556	1131.66	0.74509	0.10724	6.9479	3.70773e-12	3.4154e-10	9.46656	rpl17
ENSDARG00000041065	152.157	1.17796	0.170105	6.92494	4.36151e-12	3.98011e-10	9.4001	hspb1
ENSDARG00000039099	30.2601	-2.78407	0.403798	-6.89472	5.39713e-12	4.88949e-10	9.31074	zgc:174689; aep1
ENSDARG00000074656	24.7221	3.04704	0.444604	6.85339	7.21196e-12	6.48662e-10	9.18798	ctss2.1
ENSDARG00000041607	40.3765	2.38978	0.349557	6.83659	8.11015e-12	7.24236e-10	9.14012	eif4ebp3l
ENSDARG00000035694	160.048	1.47979	0.217594	6.8007	1.04112e-11	9.23122e-10	9.03474	stm
ENSDARG00000036298	1252.69	0.763741	0.112352	6.79778	1.06247e-11	9.35419e-10	9.02899	rps13
ENSDARG00000038713	33.2195	2.27895	0.335473	6.79326	1.09629e-11	9.5845e-10	9.01843	-
ENSDARG00000030479	97.5791	-1.31882	0.194201	-6.79101	1.1135e-11	9.65324e-10	9.01533	hmgb1b
ENSDARG00000054272	247.283	1.19047	0.175321	6.79022	1.1196e-11	9.65324e-10	9.01533	caprin1b
ENSDARG00000075014	40.4194	2.51432	0.370808	6.78064	1.19642e-11	1.0245e-09	8.98949	sqstm1
ENSDARG00000019881	113.283	1.2765	0.188393	6.77573	1.23776e-11	1.05269e-09	8.9777	bsg
ENSDARG00000069142	200.358	1.59245	0.235266	6.76871	1.29938e-11	1.09762e-09	8.95955	aars
ENSDARG00000027355	9.6859	-4.06392	0.601986	-6.75085	1.46978e-11	1.23324e-09	8.90895	slc25a4
ENSDARG00000005236	150.68	-1.441	0.214167	-6.72842	1.71515e-11	1.42005e-09	8.8477	srcap
ENSDARG00000102241	44.7042	2.22027	0.329961	6.72887	1.70986e-11	1.42005e-09	8.8477	zgc:136410
ENSDARG00000089039	64.2365	-1.58923	0.236234	-6.72738	1.72746e-11	1.42084e-09	8.84746	zgc:173585
ENSDARG00000060682	147.182	1.13831	0.16932	6.72281	1.78258e-11	1.45659e-09	8.83666	agr1
ENSDARG00000093702	222.467	1.54082	0.229546	6.71244	1.91398e-11	1.5538e-09	8.8086	si:dkey-126g1.9
ENSDARG00000032630	525.62	-1.24522	0.185666	-6.7068	1.98937e-11	1.60459e-09	8.79464	-
ENSDARG00000021124	1866.56	-0.759728	0.113505	-6.69333	2.18144e-11	1.73718e-09	8.76015	cfl1
ENSDARG00000044601	220.388	-1.02446	0.153057	-6.69333	2.18156e-11	1.73718e-09	8.76015	rtn4a
ENSDARG00000063895	864.378	-0.843149	0.126275	-6.67708	2.43746e-11	1.92868e-09	8.71474	ND1
ENSDARG00000007823	39.5911	2.30434	0.34581	6.6636	2.67209e-11	2.10104e-09	8.67757	atf3
ENSDARG00000045269	34.8555	-2.55576	0.38368	-6.66116	2.71677e-11	2.12282e-09	8.67309	-
ENSDARG00000021787	79.1165	1.53279	0.231098	6.63266	3.29691e-11	2.56012e-09	8.59174	abcb5
ENSDARG00000014690	1311.81	0.784412	0.118655	6.61086	3.82087e-11	2.94867e-09	8.53037	rps4x
ENSDARG00000020573	68.5612	-1.73098	0.261999	-6.60681	3.92679e-11	3.01183e-09	8.52117	ddx3a
ENSDARG00000034203	79.5684	-1.70088	0.257658	-6.60132	4.07514e-11	3.10655e-09	8.50772	zgc:114046; hist1h2ba
ENSDARG00000012682	320.338	-0.97437	0.147963	-6.58521	4.54256e-11	3.44188e-09	8.4632	pfn2l
ENSDARG00000018124	116.091	-1.34297	0.204141	-6.57865	4.74743e-11	3.57545e-09	8.44667	psmd3
ENSDARG00000093584	179.92	1.48485	0.226124	6.56654	5.14963e-11	3.85513e-09	8.41396	zgc:193505
ENSDARG00000043128	44.4735	1.88513	0.288405	6.53639	6.30227e-11	4.68994e-09	8.32883	cldne
ENSDARG00000023797	142.967	-1.2214	0.186899	-6.53507	6.35784e-11	4.7033e-09	8.3276	ryr1b
ENSDARG00000017775	89.479	-1.47622	0.227313	-6.49423	8.34607e-11	6.1378e-09	8.21199	atp5g3a
ENSDARG00000053448	14.3533	3.52768	0.544062	6.48397	8.93417e-11	6.53187e-09	8.18496	si:ch211-251f6.6
ENSDARG00000004169	301.479	-1.04153	0.160702	-6.48112	9.10456e-11	6.61775e-09	8.17929	stmn1a
ENSDARG00000019765	206.993	1.01241	0.15629	6.47774	9.31068e-11	6.72845e-09	8.17209	zgc:158803
ENSDARG00000093022	146.396	1.38532	0.214007	6.47324	9.59217e-11	6.89203e-09	8.16165	seph
ENSDARG00000090912	76.2316	1.41933	0.219402	6.46909	9.85956e-11	7.04367e-09	8.1522	npc2
ENSDARG00000069823	16.8894	-2.98354	0.46142	-6.466	1.0063e-10	7.14814e-09	8.14581	proca1
ENSDARG00000094041	173.219	1.25928	0.195169	6.45223	1.10214e-10	7.78475e-09	8.10876	krt17
ENSDARG00000102417	79.7403	-1.58931	0.246396	-6.45023	1.11684e-10	7.84422e-09	8.10545	psmd7
ENSDARG00000033364	34.0985	2.1862	0.340286	6.42458	1.32232e-10	9.23557e-09	8.03454	mgst3b
ENSDARG00000013755	62.5186	-1.58594	0.247325	-6.41237	1.43277e-10	9.9514e-09	8.00212	actn3a
ENSDARG00000044125	115.718	1.50525	0.235889	6.38117	1.75739e-10	1.21386e-08	7.91583	txn
ENSDARG00000088002	143.224	1.16603	0.183707	6.34719	2.19277e-10	1.50627e-08	7.8221	LOC101882092
ENSDARG00000052641	177.156	-1.29833	0.204753	-6.34096	2.28336e-10	1.55992e-08	7.8069	kpna3
ENSDARG00000056680	21.028	2.90383	0.458382	6.33495	2.37416e-10	1.61314e-08	7.79233	stc2a
ENSDARG00000025581	1149.39	0.811851	0.128349	6.32533	2.52698e-10	1.70769e-08	7.76759	rpl10
ENSDARG00000004735	472.402	-0.8505	0.134519	-6.32253	2.5731e-10	1.72951e-08	7.76208	hnrnpub
ENSDARG00000004748	19.2308	2.8852	0.457193	6.31069	2.77792e-10	1.8572e-08	7.73114	zgc:100868
ENSDARG00000040764	262.447	1.12235	0.178566	6.28534	3.27129e-10	2.17541e-08	7.66246	id1
ENSDARG00000021265	60.5619	-1.53528	0.245338	-6.25782	3.90395e-10	2.58239e-08	7.58798	mybpc2b
ENSDARG00000015164	270.102	2.30752	0.369356	6.24742	4.17275e-10	2.74567e-08	7.56135	mknk2b
ENSDARG00000079727	21.9701	2.64685	0.424054	6.24177	4.32636e-10	2.83184e-08	7.54793	sepp1b
ENSDARG00000014031	47.9517	1.79058	0.287176	6.23514	4.51384e-10	2.93917e-08	7.53178	abcc2
ENSDARG00000036832	1453.51	0.869473	0.139718	6.22306	4.87535e-10	3.15812e-08	7.50057	cyt1l
ENSDARG00000078941	34.3175	-2.14581	0.345077	-6.21835	5.02403e-10	3.23765e-08	7.48977	zgc:112234; ano9a
ENSDARG00000091902	32.3987	2.18014	0.350964	6.21187	5.23569e-10	3.35675e-08	7.47408	b3gnt2b
ENSDARG00000056008	164.997	-1.23618	0.199438	-6.19831	5.7073e-10	3.64044e-08	7.43885	atp5g1
ENSDARG00000041108	36.7627	2.0225	0.326941	6.18613	6.16603e-10	3.91308e-08	7.40748	ctsh
ENSDARG00000003854	175.996	1.2259	0.198233	6.1841	6.24569e-10	3.94362e-08	7.40411	acsl1b
ENSDARG00000037116	137.15	1.17792	0.190536	6.18215	6.32332e-10	3.97257e-08	7.40093	cxcl12a
ENSDARG00000034897	1331.01	0.722101	0.117035	6.16995	6.83107e-10	4.2701e-08	7.36956	rps10
ENSDARG00000061108	145.028	-1.04351	0.169151	-6.16908	6.86875e-10	4.2723e-08	7.36934	ep300b
ENSDARG00000053875	11.0358	-3.29075	0.533834	-6.16437	7.07657e-10	4.37977e-08	7.35855	cryba1b
ENSDARG00000015524	227.631	1.00164	0.162887	6.14927	7.78427e-10	4.79404e-08	7.3193	prps1a
ENSDARG00000021838	1724.33	0.891496	0.145561	6.12457	9.09277e-10	5.57244e-08	7.25395	rps23
ENSDARG00000076312	66.778	-1.88302	0.307598	-6.12168	9.25928e-10	5.64681e-08	7.2482	myot
ENSDARG00000015662	74.9372	1.38664	0.226737	6.11563	9.61747e-10	5.83678e-08	7.23383	pla2g12b
ENSDARG00000071601	177.645	1.30626	0.214433	6.09168	1.11734e-09	6.74833e-08	7.1708	pvalb9
ENSDARG00000013623	316.439	1.14223	0.187683	6.086	1.1577e-09	6.95842e-08	7.15749	vdac2
ENSDARG00000019230	2120.23	0.753988	0.124228	6.06941	1.28384e-09	7.6797e-08	7.11466	rpl7a
ENSDARG00000044684	27.3827	2.44036	0.403243	6.05184	1.43199e-09	8.52509e-08	7.0693	rbp4l
ENSDARG00000075593	333.486	1.15249	0.190781	6.04089	1.53269e-09	9.08137e-08	7.04185	trim71
ENSDARG00000091150	592.989	-0.734403	0.121747	-6.03219	1.61754e-09	9.53888e-08	7.0205	mki67
ENSDARG00000022817	8.44158	-3.53745	0.588184	-6.01418	1.80796e-09	1.06118e-07	6.97421	pvalb3
ENSDARG00000098355	124.046	-1.20376	0.200228	-6.01196	1.83295e-09	1.07082e-07	6.97028	atp5h
ENSDARG00000023532	192.598	0.908781	0.151448	6.00061	1.96574e-09	1.14305e-07	6.94193	pinx1
ENSDARG00000002589	189.332	-2.40418	0.40075	-5.9992	1.9829e-09	1.1477e-07	6.94017	mylpfb
ENSDARG00000042221	82.5986	1.54949	0.258728	5.98888	2.11288e-09	1.21729e-07	6.91461	mthfd1l
ENSDARG00000008697	67.2271	1.36098	0.227411	5.98467	2.16829e-09	1.2378e-07	6.90735	epas1a
ENSDARG00000075831	30.5065	2.21928	0.370782	5.9854	2.1586e-09	1.2378e-07	6.90735	slc7a8a
ENSDARG00000077291	2131.03	0.670671	0.112134	5.98097	2.2181e-09	1.26048e-07	6.89946	rps2
ENSDARG00000036044	1304.25	0.883219	0.147713	5.97928	2.24126e-09	1.26788e-07	6.89692	-
ENSDARG00000037285	6.8752	-3.66952	0.614584	-5.97074	2.36186e-09	1.33009e-07	6.87612	mipa
ENSDARG00000088514	7.43403	-3.6781	0.616247	-5.96854	2.39382e-09	1.34204e-07	6.87223	and1
ENSDARG00000060004	92.508	1.2866	0.21582	5.96143	2.50047e-09	1.39558e-07	6.85525	fzd7a
ENSDARG00000104375	68.1832	1.36783	0.229602	5.9574	2.56286e-09	1.42404e-07	6.84648	sec24a
ENSDARG00000075707	53.1243	1.5607	0.262162	5.95317	2.62999e-09	1.45487e-07	6.83718	wu:fb77a09
ENSDARG00000039547	93.7442	-1.40701	0.236443	-5.95073	2.66952e-09	1.47023e-07	6.83261	si:ch211-113a14.22
ENSDARG00000052846	28.6137	2.11494	0.356258	5.93653	2.91111e-09	1.59626e-07	6.7969	fsta
ENSDARG00000100826	111.274	1.14334	0.192898	5.92717	3.08203e-09	1.6826e-07	6.77402	hif1al
ENSDARG00000035860	1084.21	0.710344	0.120066	5.9163	3.29269e-09	1.78979e-07	6.7472	rps28
ENSDARG00000089750	59.4157	1.6969	0.287523	5.90177	3.59619e-09	1.9463e-07	6.71079	si:dkey-26g8.5
ENSDARG00000091446	82.6469	-1.77294	0.300557	-5.89884	3.6606e-09	1.97262e-07	6.70496	zgc:163040; hist1h4l
ENSDARG00000076839	28.2282	2.31091	0.392265	5.89118	3.83438e-09	2.0574e-07	6.68668	ftr86
ENSDARG00000029500	997.58	0.611319	0.103879	5.88494	3.98203e-09	2.12749e-07	6.67213	rpl34
ENSDARG00000030602	1352.39	0.686175	0.116852	5.87219	4.30082e-09	2.28804e-07	6.64054	rps19
ENSDARG00000041619	1561.58	0.770382	0.131336	5.86572	4.47183e-09	2.36893e-07	6.62545	gnb2l1
ENSDARG00000053254	1749.89	-2.06589	0.352866	-5.85459	4.78175e-09	2.52242e-07	6.59818	mylpfa
ENSDARG00000101324	565.31	1.86079	0.319069	5.83193	5.47896e-09	2.87807e-07	6.5409	apoa1b
ENSDARG00000037870	1571.39	0.580749	0.0996242	5.8294	5.56279e-09	2.89775e-07	6.53794	actb2
ENSDARG00000055868	247.635	1.01145	0.173496	5.82983	5.54844e-09	2.89775e-07	6.53794	rsl1d1
ENSDARG00000040492	35.5541	1.91806	0.32975	5.81671	6.00158e-09	3.11335e-07	6.50677	mthfd1b
ENSDARG00000056481	192.294	-1.13786	0.195738	-5.81318	6.12986e-09	3.16676e-07	6.49939	vat1
ENSDARG00000078578	64.241	-1.38296	0.23795	-5.81197	6.17413e-09	3.1765e-07	6.49805	fam222bb
ENSDARG00000053803	64.2896	-1.3293	0.229228	-5.79903	6.67011e-09	3.41761e-07	6.46628	klhl43
ENSDARG00000005162	283.394	0.81978	0.14168	5.78614	7.20238e-09	3.67527e-07	6.43471	tpm3
ENSDARG00000040027	34.7793	2.05127	0.354728	5.78267	7.35253e-09	3.73664e-07	6.42752	osbpl10b
ENSDARG00000043446	18.622	2.48212	0.431079	5.75792	8.51555e-09	4.31018e-07	6.3655	efhd1
ENSDARG00000069375	8.11633	3.51189	0.611528	5.74281	9.31175e-09	4.69417e-07	6.32844	zgc:162608
ENSDARG00000016443	587.459	0.661126	0.115354	5.73126	9.96855e-09	5.00509e-07	6.30059	eif3c
ENSDARG00000025073	1997.33	0.539807	0.0942667	5.72638	1.02597e-08	5.13067e-07	6.28983	rpl18a
ENSDARG00000058996	28.1408	2.12717	0.372254	5.71431	1.10151e-08	5.48646e-07	6.26071	-
ENSDARG00000091090	13.3703	-2.9818	0.521943	-5.71289	1.11075e-08	5.51056e-07	6.2588	-
ENSDARG00000021669	133.574	1.04361	0.182859	5.70717	1.14868e-08	5.6762e-07	6.24594	sec61a1
ENSDARG00000000551	94.6492	1.79971	0.315799	5.69891	1.20578e-08	5.91164e-07	6.22829	slc1a4
ENSDARG00000025338	18.1533	2.75323	0.4831	5.69908	1.20458e-08	5.91164e-07	6.22829	hagh
ENSDARG00000017244	123.311	-1.04281	0.183161	-5.69341	1.24525e-08	6.08128e-07	6.216	chd6
ENSDARG00000061249	72.9025	-1.52411	0.267897	-5.68915	1.27673e-08	6.21078e-07	6.20685	myom1a
ENSDARG00000075121	48.4421	1.80713	0.318288	5.67766	1.36554e-08	6.61703e-07	6.17934	hbegfa
ENSDARG00000100398	61.0421	-1.41815	0.249813	-5.67682	1.3722e-08	6.62363e-07	6.1789	pax7a
ENSDARG00000035519	216.984	1.14295	0.201897	5.66105	1.50453e-08	7.23447e-07	6.14059	histh1l
ENSDARG00000100697	108.961	2.8538	0.504285	5.65909	1.52173e-08	7.28917e-07	6.13732	-
ENSDARG00000101160	13.8605	2.95994	0.52563	5.63121	1.78949e-08	8.539e-07	6.06859	apoa4a
ENSDARG00000069855	103.105	-1.28341	0.228196	-5.62417	1.86398e-08	8.86066e-07	6.05253	pnisr
ENSDARG00000101082	117.961	1.17925	0.210053	5.61408	1.97615e-08	9.35827e-07	6.0288	eif3s6ip
ENSDARG00000043697	35.1281	-1.82766	0.326852	-5.59169	2.24865e-08	1.06086e-06	5.97434	nefmb
ENSDARG00000060113	32.1195	2.19637	0.393381	5.58331	2.35987e-08	1.10658e-06	5.95602	znf395a
ENSDARG00000069583	58.1198	1.57539	0.282173	5.58306	2.36328e-08	1.10658e-06	5.95602	zgc:114181
ENSDARG00000099776	108.963	1.39137	0.250395	5.55671	2.74914e-08	1.28245e-06	5.89196	glula
ENSDARG00000021193	82.3921	-1.21135	0.218501	-5.54389	2.95819e-08	1.37485e-06	5.86175	coro1cb
ENSDARG00000007024	20.3377	2.41085	0.436968	5.51723	3.44386e-08	1.59464e-06	5.79734	-
ENSDARG00000039515	107.214	1.15364	0.209127	5.51644	3.45944e-08	1.59594e-06	5.79698	atf4a
ENSDARG00000055618	274.979	-1.14684	0.20823	-5.50756	3.63833e-08	1.6723e-06	5.77669	acta1b
ENSDARG00000076120	589.798	-0.589628	0.107127	-5.504	3.71266e-08	1.70021e-06	5.7695	foxp4
ENSDARG00000020364	58.6981	1.3661	0.248335	5.50104	3.77555e-08	1.71804e-06	5.76497	fbp1b
ENSDARG00000099104	1209.87	0.687238	0.124932	5.50088	3.77908e-08	1.71804e-06	5.76497	rpl24
ENSDARG00000001950	160.111	-1.0804	0.19653	-5.49739	3.8546e-08	1.73972e-06	5.75952	ak1
ENSDARG00000070914	116.771	1.1768	0.214057	5.4976	3.84997e-08	1.73972e-06	5.75952	dusp6
ENSDARG00000053269	9.13071	-2.99153	0.544283	-5.49627	3.87905e-08	1.74446e-06	5.75834	slc2a15b
ENSDARG00000056151	13.8835	-2.58073	0.469947	-5.49154	3.98436e-08	1.78539e-06	5.74827	tyrp1b
ENSDARG00000008292	148.761	1.07166	0.195791	5.4735	4.41241e-08	1.97014e-06	5.7055	eif2s3
ENSDARG00000076332	14.507	-2.6036	0.476761	-5.46102	4.73415e-08	2.10628e-06	5.67648	si:ch211-159i8.4
ENSDARG00000032327	208.374	1.10916	0.203552	5.44902	5.06476e-08	2.24164e-06	5.64943	usp36
ENSDARG00000056725	669.371	-0.58133	0.106692	-5.44869	5.07426e-08	2.24164e-06	5.64943	hmgb3a
ENSDARG00000086332	32.0812	1.82255	0.334953	5.44121	5.29192e-08	2.32956e-06	5.63273	bri3
ENSDARG00000057903	181.794	-1.08101	0.199025	-5.43155	5.58666e-08	2.45068e-06	5.61071	-
ENSDARG00000005513	720.869	0.610004	0.1125	5.42225	5.8853e-08	2.57266e-06	5.58962	naca
ENSDARG00000057571	31.1651	-1.68939	0.311686	-5.42018	5.95405e-08	2.59364e-06	5.58609	pgam2
ENSDARG00000014017	140.898	-1.11351	0.205667	-5.41413	6.15875e-08	2.6735e-06	5.57292	rrm1
ENSDARG00000016200	22.6046	2.16374	0.400564	5.40172	6.60051e-08	2.85535e-06	5.54434	trib3
ENSDARG00000022372	25.1544	2.11023	0.391727	5.387	7.1645e-08	3.08864e-06	5.51023	kng1
ENSDARG00000087640	58.5728	-1.36203	0.253307	-5.37701	7.57341e-08	3.2537e-06	5.48762	nsfl1c
ENSDARG00000010481	153.541	-0.884926	0.164683	-5.37352	7.72152e-08	3.30597e-06	5.4807	bzw1a
ENSDARG00000057121	7.91426	3.336	0.621604	5.36675	8.01674e-08	3.42066e-06	5.46589	c7b
ENSDARG00000052348	113.107	-1.09682	0.204498	-5.36351	8.16194e-08	3.45929e-06	5.46101	smarca5
ENSDARG00000058128	302.606	-0.697034	0.129959	-5.3635	8.16263e-08	3.45929e-06	5.46101	msna
ENSDARG00000052377	102.048	-1.06887	0.199442	-5.35931	8.35386e-08	3.52838e-06	5.45243	psmd12
ENSDARG00000002347	9.58487	3.01851	0.563451	5.35718	8.45328e-08	3.54388e-06	5.45052	cyp11a1
ENSDARG00000011573	28.9402	1.97294	0.368313	5.3567	8.4756e-08	3.54388e-06	5.45052	abcb11a
ENSDARG00000070568	118.825	-1.00468	0.187531	-5.35738	8.44389e-08	3.54388e-06	5.45052	atad5a
ENSDARG00000102829	36.708	1.59614	0.298155	5.35339	8.63232e-08	3.59737e-06	5.44401	cobll1b
ENSDARG00000006963	49.5207	-1.56243	0.292178	-5.34753	8.91615e-08	3.67887e-06	5.43429	cse1l
ENSDARG00000033307	52.4303	1.48872	0.27837	5.34799	8.89372e-08	3.67887e-06	5.43429	igf2b
ENSDARG00000094792	14.296	-2.49084	0.465694	-5.34867	8.86007e-08	3.67887e-06	5.43429	twf2
ENSDARG00000099974	62.0105	-1.46848	0.274748	-5.34481	9.05115e-08	3.72229e-06	5.42919	ldb3b
ENSDARG00000015057	34.8685	-1.57242	0.294513	-5.33906	9.34273e-08	3.8296e-06	5.41685	ube2d4
ENSDARG00000099175	211.501	-0.822571	0.154227	-5.33352	9.63275e-08	3.93558e-06	5.40499	hmgb1a
ENSDARG00000087697	42.4027	-1.51182	0.284478	-5.31438	1.0702e-07	4.3582e-06	5.36069	lpl
ENSDARG00000010085	21.2198	2.37008	0.446075	5.31319	1.07724e-07	4.36578e-06	5.35994	p4ha2
ENSDARG00000018334	1092.04	0.628805	0.118368	5.31229	1.08254e-07	4.36578e-06	5.35994	rpl35
ENSDARG00000096533	23.7384	2.0169	0.379643	5.31262	1.0806e-07	4.36578e-06	5.35994	rltgr
ENSDARG00000016691	49.1949	1.425	0.268317	5.31086	1.09109e-07	4.38613e-06	5.35792	cd9b
ENSDARG00000102674	147.524	-0.955012	0.180096	-5.30279	1.14044e-07	4.5698e-06	5.3401	ckap5
ENSDARG00000002216	49.0986	1.44791	0.273928	5.28574	1.25197e-07	5.00069e-06	5.30097	tbx3a
ENSDARG00000040534	95.3646	1.17112	0.221632	5.28409	1.2633e-07	5.02987e-06	5.29844	epcam
ENSDARG00000039007	154.934	-1.00869	0.191516	-5.26687	1.38771e-07	5.50768e-06	5.25903	eno3
ENSDARG00000044895	19.5431	-2.19462	0.41715	-5.261	1.43276e-07	5.66846e-06	5.24653	fmoda
ENSDARG00000086950	44.3654	1.5531	0.295325	5.25894	1.44885e-07	5.71405e-06	5.24306	-
ENSDARG00000039576	168.37	0.829496	0.157868	5.25436	1.48537e-07	5.83963e-06	5.23361	fstl1b
ENSDARG00000045132	157.445	1.05171	0.200247	5.25205	1.50412e-07	5.89481e-06	5.22953	vdac1
ENSDARG00000036316	889.991	0.673831	0.128576	5.24072	1.59953e-07	6.24916e-06	5.20418	rpl39
ENSDARG00000093156	53.1279	-1.82044	0.348777	-5.21949	1.79413e-07	6.9876e-06	5.15567	-
ENSDARG00000007955	38.8604	1.72279	0.330447	5.21351	1.85299e-07	7.19443e-06	5.143	iars
ENSDARG00000058365	113.302	-1.10404	0.212542	-5.19445	2.0533e-07	7.94749e-06	5.09977	hspb8
ENSDARG00000019644	451.297	0.77171	0.148583	5.19382	2.06027e-07	7.94986e-06	5.09964	ldhba
ENSDARG00000061379	28.251	-2.05489	0.395919	-5.19018	2.10088e-07	8.0816e-06	5.0925	cmya5
ENSDARG00000057353	32.4325	-1.78012	0.343597	-5.18084	2.20888e-07	8.471e-06	5.07207	-
ENSDARG00000099184	191.575	-0.87407	0.168852	-5.17655	2.26032e-07	8.64175e-06	5.0634	map2k6
ENSDARG00000022101	98.5159	-1.01557	0.197141	-5.15148	2.58435e-07	9.82054e-06	5.00786	-
ENSDARG00000031495	645.087	-0.601738	0.116806	-5.15161	2.58259e-07	9.82054e-06	5.00786	seta
ENSDARG00000062463	55.7815	-1.36824	0.265638	-5.15076	2.59433e-07	9.82857e-06	5.00751	-
ENSDARG00000076223	96.9012	1.0589	0.20571	5.14753	2.63944e-07	9.96926e-06	5.00134	zgc:92744
ENSDARG00000055100	63.9894	1.26172	0.245454	5.14034	2.74239e-07	1.03269e-05	4.98603	cxcl12b
ENSDARG00000006399	402.755	-0.656609	0.127871	-5.13494	2.82236e-07	1.05961e-05	4.97485	ywhae1
ENSDARG00000077717	1674.21	0.503468	0.0980681	5.13386	2.83861e-07	1.06253e-05	4.97366	rpl29
ENSDARG00000036073	39.3568	1.60131	0.312341	5.1268	2.94712e-07	1.09985e-05	4.95867	cebpg
ENSDARG00000031317	41.6155	1.60529	0.313777	5.11601	3.12068e-07	1.16115e-05	4.93511	ppdpfb
ENSDARG00000012987	35.4966	1.77786	0.347733	5.11273	3.17541e-07	1.17801e-05	4.92885	gpia
ENSDARG00000041925	10.6005	-2.72316	0.532693	-5.11207	3.1865e-07	1.17863e-05	4.92862	cryba2b
ENSDARG00000019365	32.629	1.97153	0.385707	5.11145	3.19692e-07	1.17899e-05	4.92849	zgc:110712
ENSDARG00000071014	138.737	0.853179	0.167026	5.10805	3.25501e-07	1.19689e-05	4.92195	s100u
ENSDARG00000001870	55.8682	1.29195	0.253037	5.10577	3.29454e-07	1.20787e-05	4.91798	atp1a1a.4
ENSDARG00000023157	18.8034	2.23375	0.437755	5.10273	3.34784e-07	1.22382e-05	4.91228	si:rp71-1g18.7; cbln10
ENSDARG00000016889	110.129	0.987828	0.193618	5.10195	3.36168e-07	1.2253e-05	4.91176	eif3g
ENSDARG00000013379	132.516	-0.987258	0.193547	-5.10088	3.38086e-07	1.22871e-05	4.91055	ppp6r3
ENSDARG00000053365	1750.25	0.588852	0.115806	5.08483	3.67956e-07	1.33339e-05	4.87504	rpl31
ENSDARG00000016706	69.4513	1.15858	0.227993	5.08164	3.74195e-07	1.34818e-05	4.87025	atic
ENSDARG00000069981	94.4255	-1.04469	0.205559	-5.08219	3.73117e-07	1.34818e-05	4.87025	cspg5a
ENSDARG00000025977	52.883	-1.35935	0.267849	-5.07508	3.87342e-07	1.39154e-05	4.85651	blmh
ENSDARG00000027310	327.148	1.02784	0.202901	5.06573	4.06842e-07	1.4574e-05	4.83642	lsp1
ENSDARG00000001889	217.155	-0.892271	0.176602	-5.05243	4.36227e-07	1.5582e-05	4.80738	tuba1a; zgc:123298
ENSDARG00000100095	118.092	0.939642	0.186184	5.04685	4.49146e-07	1.59978e-05	4.79594	anxa1b
ENSDARG00000056090	186.074	-0.786805	0.156432	-5.02971	4.91229e-07	1.7447e-05	4.75828	capza1b
ENSDARG00000099380	2184.52	0.453314	0.0902214	5.02446	5.0484e-07	1.78796e-05	4.74764	rpl13
ENSDARG00000079932	76.7453	1.33919	0.266796	5.01953	5.17983e-07	1.82933e-05	4.73771	zgc:152830
ENSDARG00000011597	49.5279	-1.34752	0.269374	-5.00243	5.66115e-07	1.99368e-05	4.70034	atxn2l
ENSDARG00000010965	222.648	-0.78128	0.156235	-5.00067	5.71324e-07	1.9957e-05	4.69991	psma8
ENSDARG00000090228	43.3511	1.35377	0.27072	5.00062	5.71476e-07	1.9957e-05	4.69991	gsta.1
ENSDARG00000100825	82.971	-1.17544	0.235046	-5.00092	5.70583e-07	1.9957e-05	4.69991	calm3a
ENSDARG00000079278	10.0756	-2.56215	0.512991	-4.99452	5.89811e-07	2.05399e-05	4.6874	zgc:174877
ENSDARG00000041895	180.023	0.845475	0.169595	4.98524	6.18841e-07	2.1491e-05	4.66774	cad
ENSDARG00000045928	136.357	-0.945734	0.189826	-4.98211	6.28934e-07	2.1781e-05	4.66192	psma4
ENSDARG00000017741	97.0458	-1.14882	0.23063	-4.98124	6.31781e-07	2.18191e-05	4.66116	g3bp1
ENSDARG00000001873	93.4185	1.27711	0.256813	4.97292	6.59527e-07	2.27146e-05	4.64369	phgdh
ENSDARG00000021257	178.147	0.79031	0.15912	4.96675	6.80846e-07	2.33844e-05	4.63107	eif3d
ENSDARG00000098573	39.3376	-1.79714	0.362058	-4.96369	6.91679e-07	2.36914e-05	4.62541	sgcd
ENSDARG00000015123	110.62	0.987085	0.198921	4.9622	6.97e-07	2.37727e-05	4.62392	dnase1l4.1
ENSDARG00000063912	3164.69	-0.741886	0.149529	-4.96149	6.99539e-07	2.37727e-05	4.62392	COX3
ENSDARG00000098746	13.1073	2.4259	0.488951	4.96143	6.99756e-07	2.37727e-05	4.62392	dhrs13l1
ENSDARG00000024295	30.6716	1.70458	0.34447	4.94843	7.48146e-07	2.53478e-05	4.59606	-
ENSDARG00000071549	10.5594	-2.4506	0.49538	-4.94691	7.54008e-07	2.54773e-05	4.59385	ecm2
ENSDARG00000040565	307.454	-1.86624	0.377557	-4.94294	7.69523e-07	2.59315e-05	4.58617	ckmb
ENSDARG00000103732	91.468	-1.21289	0.245807	-4.93432	8.04324e-07	2.70313e-05	4.56813	plp1a
ENSDARG00000045639	184.559	-0.89346	0.181095	-4.93366	8.07014e-07	2.7049e-05	4.56785	elavl4
ENSDARG00000013295	41.5476	1.6972	0.344141	4.93169	8.15214e-07	2.71568e-05	4.56612	slc2a3a
ENSDARG00000015709	33.3386	1.68174	0.341029	4.93137	8.16547e-07	2.71568e-05	4.56612	hsd17b12a
ENSDARG00000099420	83.0132	-2.34277	0.47508	-4.93132	8.16747e-07	2.71568e-05	4.56612	nme2b.2
ENSDARG00000058543	129.374	0.915467	0.185722	4.92923	8.25561e-07	2.73417e-05	4.56317	lama5
ENSDARG00000059646	93.6073	1.52255	0.3089	4.92896	8.26682e-07	2.73417e-05	4.56317	nt5dc2
ENSDARG00000036252	22.3882	1.87701	0.380924	4.92752	8.3278e-07	2.74707e-05	4.56113	rras2
ENSDARG00000014041	34.7338	-1.55814	0.316793	-4.91847	8.72219e-07	2.8696e-05	4.54218	smarcad1a
ENSDARG00000100223	49.3001	1.29951	0.264377	4.91535	8.86227e-07	2.90803e-05	4.5364	-
ENSDARG00000018111	32.998	1.963	0.399989	4.90765	9.21745e-07	3.01666e-05	4.52047	kdm7aa
ENSDARG00000006413	1142.88	0.551442	0.112386	4.90667	9.26349e-07	3.02382e-05	4.51944	rpl38
ENSDARG00000007982	74.8165	-1.11769	0.228098	-4.90006	9.58086e-07	3.11927e-05	4.50595	onecut1
ENSDARG00000096003	104.259	-0.979609	0.200107	-4.89543	9.80913e-07	3.18529e-05	4.49685	si:dkeyp-80c12.10
ENSDARG00000030270	205.375	-2.13461	0.436433	-4.89104	1.00306e-06	3.24877e-05	4.48828	tnnt3a
ENSDARG00000032725	2343.43	0.450415	0.0923645	4.8765	1.07987e-06	3.48851e-05	4.45736	rps27a
ENSDARG00000039051	17.7841	-2.12786	0.437008	-4.86917	1.12069e-06	3.60421e-05	4.44319	hhatla
ENSDARG00000062326	727.214	-0.526336	0.108099	-4.86903	1.12145e-06	3.60421e-05	4.44319	hmgn7
ENSDARG00000004906	106.716	-0.929783	0.191069	-4.86622	1.13756e-06	3.6466e-05	4.43811	stip1
ENSDARG00000035400	809.208	0.527785	0.108756	4.85292	1.21658e-06	3.88994e-05	4.41006	btf3
ENSDARG00000020454	51.8201	-1.22388	0.252318	-4.85055	1.23118e-06	3.92659e-05	4.40598	psmd8
ENSDARG00000104068	42.9877	1.56552	0.322817	4.84957	1.23727e-06	3.93596e-05	4.40495	gstp1
ENSDARG00000097224	31.3628	-1.65546	0.341442	-4.84845	1.24431e-06	3.94832e-05	4.40359	-
ENSDARG00000006939	9.59568	2.63433	0.543446	4.84745	1.25061e-06	3.95827e-05	4.4025	tbx6l
ENSDARG00000075559	136.423	-0.824147	0.170073	-4.84584	1.2608e-06	3.98044e-05	4.40007	ppm1g
ENSDARG00000002215	45.7087	-1.3209	0.272771	-4.84251	1.28211e-06	4.03751e-05	4.39389	rtca
ENSDARG00000074229	109.988	-0.926151	0.191334	-4.8405	1.29515e-06	4.05826e-05	4.39166	prr12a
ENSDARG00000101295	42.2417	-1.37144	0.283327	-4.84049	1.29519e-06	4.05826e-05	4.39166	psmd4a
ENSDARG00000063908	3224.34	-0.525004	0.108475	-4.83985	1.29936e-06	4.06114e-05	4.39135	COX2
ENSDARG00000007576	5.08173	-3.0716	0.635661	-4.83213	1.35078e-06	4.21133e-05	4.37558	crybb1l1
ENSDARG00000055737	54.949	-1.23283	0.255275	-4.82941	1.36938e-06	4.25871e-05	4.37072	ube3a
ENSDARG00000042905	1220.16	0.713549	0.147785	4.82829	1.37712e-06	4.27215e-05	4.36935	rpl10a
ENSDARG00000041433	8.69211	2.8994	0.601076	4.82367	1.40938e-06	4.36139e-05	4.36037	si:dkey-7c18.24
ENSDARG00000015876	19.6861	-2.16966	0.450201	-4.81931	1.44053e-06	4.44678e-05	4.35195	-
ENSDARG00000020609	46.4459	-1.34906	0.280359	-4.81192	1.49485e-06	4.6031e-05	4.33695	snap25a
ENSDARG00000037244	5.4586	3.02342	0.6286	4.80977	1.51101e-06	4.64144e-05	4.33335	gpr137
ENSDARG00000103057	230.534	-0.691194	0.143836	-4.80542	1.54427e-06	4.73197e-05	4.32496	-
ENSDARG00000036028	17.9075	2.19834	0.457905	4.80085	1.5799e-06	4.81753e-05	4.31718	arrdc3b
ENSDARG00000076129	72.5055	-1.30689	0.272201	-4.8012	1.57717e-06	4.81753e-05	4.31718	si:ch73-36p18.3
ENSDARG00000017397	238.637	-0.68977	0.143724	-4.79926	1.59254e-06	4.84428e-05	4.31477	smarcc1a
ENSDARG00000055108	15.435	2.29829	0.479198	4.7961	1.61781e-06	4.90918e-05	4.30899	gde1
ENSDARG00000104687	22.0065	1.88334	0.393542	4.7856	1.70476e-06	5.16051e-05	4.28731	slc16a9b
ENSDARG00000088091	349.263	0.666297	0.139401	4.77971	1.75549e-06	5.30123e-05	4.27562	pfn1
ENSDARG00000013317	21.0615	-1.7887	0.374405	-4.77745	1.77534e-06	5.34825e-05	4.27179	pygmb
ENSDARG00000003952	368.388	-0.64443	0.13501	-4.7732	1.81318e-06	5.44914e-05	4.26367	pfn2
ENSDARG00000070297	15.222	-2.10199	0.440837	-4.76818	1.85893e-06	5.57323e-05	4.25389	zgc:114046; si:ch211-113a14.28
ENSDARG00000004078	72.089	1.07974	0.226484	4.76739	1.86629e-06	5.58191e-05	4.25322	acsl4a
ENSDARG00000041435	1071.48	0.585988	0.122929	4.76688	1.87101e-06	5.58266e-05	4.25316	uba52
ENSDARG00000078459	60.8421	-1.23333	0.258768	-4.76618	1.87752e-06	5.58875e-05	4.25269	cux1a
ENSDARG00000013505	47.3395	-1.30225	0.27338	-4.76353	1.90236e-06	5.64925e-05	4.24801	ube2kb
ENSDARG00000011665	124.275	1.2079	0.253648	4.7621	1.91586e-06	5.67586e-05	4.24597	aldoaa
ENSDARG00000015889	139.869	-0.807108	0.169656	-4.75733	1.96167e-06	5.79781e-05	4.23674	zc3h15
ENSDARG00000059906	215.222	0.845624	0.177798	4.7561	1.97367e-06	5.80584e-05	4.23613	sdc4
ENSDARG00000078992	95.3533	-1.2057	0.253492	-4.75636	1.97118e-06	5.80584e-05	4.23613	wnk1a
ENSDARG00000089626	79.4162	-1.14918	0.242101	-4.74669	2.06775e-06	6.06833e-05	4.21693	ptges3b
ENSDARG00000032765	230.27	0.89621	0.188987	4.74218	2.11434e-06	6.19052e-05	4.20827	net1
ENSDARG00000024548	12.6508	-2.24172	0.473468	-4.73468	2.19403e-06	6.39959e-05	4.19385	cryba4
ENSDARG00000030775	19.7038	2.0209	0.426846	4.7345	2.19599e-06	6.39959e-05	4.19385	sybl1
ENSDARG00000039196	86.3061	1.07881	0.228119	4.72914	2.25477e-06	6.55562e-05	4.18339	greb1l
ENSDARG00000023160	68.8798	1.17318	0.248163	4.72748	2.27327e-06	6.59406e-05	4.18085	snrnp40
ENSDARG00000077492	43.9811	1.57863	0.334117	4.72479	2.30357e-06	6.66649e-05	4.1761	atp8a2
ENSDARG00000105195	37.5568	-1.48988	0.315479	-4.72259	2.32861e-06	6.72339e-05	4.17241	dnajc21
ENSDARG00000044093	1603.75	0.529161	0.112191	4.71663	2.39781e-06	6.90723e-05	4.1607	rpl13a
ENSDARG00000046157	1025.86	0.576299	0.122448	4.70648	2.52032e-06	7.24345e-05	4.14005	zgc:114188
ENSDARG00000045776	195.379	-0.747971	0.159698	-4.68365	2.81814e-06	8.08082e-05	4.09254	cnbpa
ENSDARG00000089331	7.26508	2.79254	0.596584	4.68088	2.85642e-06	8.17184e-05	4.08768	urahb
ENSDARG00000019778	1969.4	0.525448	0.112272	4.68012	2.86708e-06	8.1836e-05	4.08706	rps6
ENSDARG00000010266	413.33	0.621472	0.132819	4.67909	2.88155e-06	8.20618e-05	4.08586	igf2bp3
ENSDARG00000096419	31.4334	-1.43689	0.307246	-4.67666	2.91579e-06	8.28482e-05	4.08172	-
ENSDARG00000099528	68.5925	1.1855	0.253915	4.6689	3.02823e-06	8.58478e-05	4.06627	dus3l
ENSDARG00000001431	61.212	-1.24325	0.26634	-4.66792	3.04261e-06	8.60605e-05	4.0652	actn3b
ENSDARG00000004094	49.6788	-1.22667	0.262921	-4.66553	3.07815e-06	8.67399e-05	4.06178	acsbg2
ENSDARG00000026712	105.995	-0.846141	0.181366	-4.66538	3.08051e-06	8.67399e-05	4.06178	rab5c
ENSDARG00000063627	119.848	0.908431	0.194901	4.66098	3.14713e-06	8.84168e-05	4.05347	bop1
ENSDARG00000100422	63.018	1.11718	0.239921	4.65644	3.21731e-06	9.01855e-05	4.04486	ptpro
ENSDARG00000013575	77.2408	1.38081	0.296662	4.65448	3.24803e-06	9.08432e-05	4.04171	rfx2
ENSDARG00000007320	1424.61	0.472631	0.101693	4.64761	3.35806e-06	9.37109e-05	4.02821	rpl7
ENSDARG00000071015	38.5409	-1.2603	0.271346	-4.64463	3.40679e-06	9.48589e-05	4.02292	pbxip1a
ENSDARG00000079688	234.421	-0.687193	0.148154	-4.63838	3.51146e-06	9.7556e-05	4.01075	-
ENSDARG00000010946	109.333	1.23203	0.265954	4.63251	3.61255e-06	0.000100142	3.99938	cbsb
ENSDARG00000005754	152.89	0.751769	0.162385	4.62956	3.66451e-06	0.000101358	3.99414	ptprfb
ENSDARG00000021059	37.6787	1.52047	0.328477	4.62883	3.67731e-06	0.000101487	3.99359	alas1
ENSDARG00000030411	9.23662	-2.42377	0.523745	-4.62777	3.69618e-06	0.000101783	3.99232	-
ENSDARG00000056743	56.8748	-1.23185	0.266242	-4.6268	3.71365e-06	0.00010204	3.99123	cavin4b
ENSDARG00000090190	237.149	0.769736	0.166436	4.62481	3.74946e-06	0.000102721	3.98834	bcam
ENSDARG00000104279	338.261	0.670294	0.144944	4.62451	3.75489e-06	0.000102721	3.98834	appa
ENSDARG00000016651	158.456	-0.839408	0.181704	-4.61964	3.84404e-06	0.00010493	3.9791	znf106a
ENSDARG00000001807	9.43552	2.4662	0.533993	4.61842	3.86676e-06	0.000105321	3.97749	tnfrsf21
ENSDARG00000001782	14.9239	2.11975	0.459225	4.61593	3.91331e-06	0.000106357	3.97323	prkacba
ENSDARG00000029069	105.562	-2.51978	0.546466	-4.61104	4.00667e-06	0.000108658	3.96394	tnni2a.4
ENSDARG00000017320	35.7451	1.40791	0.30571	4.60537	4.11736e-06	0.000111418	3.95304	f11r.1
ENSDARG00000034013	46.4605	1.23506	0.268566	4.59871	4.25118e-06	0.000114791	3.94009	rgmd
ENSDARG00000039185	96.9491	0.893189	0.194381	4.59505	4.32639e-06	0.00011657	3.93341	nfyba
ENSDARG00000003269	72.0482	1.09991	0.239591	4.59076	4.41639e-06	0.000118739	3.92541	clcn3
ENSDARG00000012405	438.48	-0.792497	0.172911	-4.58325	4.57803e-06	0.000122821	3.91073	col1a1a
ENSDARG00000099306	43.1538	1.32037	0.288212	4.58125	4.62201e-06	0.000123735	3.90751	zgc:175088
ENSDARG00000004034	127.511	0.895334	0.195948	4.56924	4.89487e-06	0.00013076	3.88352	arhgdig
ENSDARG00000069334	8.17811	2.58414	0.565879	4.56659	4.95712e-06	0.00013186	3.87989	-
ENSDARG00000090286	12.6464	2.16534	0.474136	4.56692	4.94951e-06	0.00013186	3.87989	serpina1
ENSDARG00000051836	24.2293	1.80006	0.394547	4.56235	5.05844e-06	0.000134269	3.87202	si:dkeyp-19e1.3
ENSDARG00000060537	112.389	-0.857848	0.188149	-4.55941	5.12985e-06	0.000135876	3.86686	atad2b
ENSDARG00000058488	11.1741	2.61884	0.574792	4.55614	5.21015e-06	0.000137711	3.86103	adora2ab
ENSDARG00000061131	24.572	-1.66594	0.365979	-4.55199	5.31401e-06	0.00014016	3.85338	kif21a
ENSDARG00000036041	31.319	1.5902	0.349644	4.54804	5.41475e-06	0.000142217	3.84705	f2
ENSDARG00000037190	6.74273	-2.64878	0.582344	-4.54848	5.40343e-06	0.000142217	3.84705	-
ENSDARG00000063295	490.397	0.608062	0.133749	4.5463	5.45979e-06	0.000143099	3.84436	myh9a
ENSDARG00000044485	54.0764	1.52979	0.336675	4.54382	5.52426e-06	0.000144486	3.84017	sall4
ENSDARG00000087779	80.4148	1.03105	0.22765	4.5291	5.92366e-06	0.000154609	3.81077	pum3
ENSDARG00000099123	4.17784	-2.89074	0.639107	-4.52309	6.0943e-06	0.000158731	3.79934	si:dkey-23a13.14
ENSDARG00000044809	18.2283	2.08202	0.460566	4.52056	6.16771e-06	0.000160309	3.79504	fpgs
ENSDARG00000052419	108.356	-0.985818	0.218425	-4.5133	6.38279e-06	0.000165302	3.78172	ankrd12
ENSDARG00000075433	70.4698	-1.40986	0.312388	-4.51318	6.38626e-06	0.000165302	3.78172	myom2a
ENSDARG00000015862	577.631	0.723827	0.160434	4.51169	6.43137e-06	0.000165816	3.78037	rpl5b
ENSDARG00000037009	193.287	-0.723803	0.16043	-4.51165	6.43264e-06	0.000165816	3.78037	banf1
ENSDARG00000025522	19.1991	2.07114	0.459217	4.51015	6.47817e-06	0.000166646	3.7782	sgk1
ENSDARG00000006588	9.98798	2.47952	0.549976	4.50842	6.53109e-06	0.000167663	3.77556	zgc:111983
ENSDARG00000006200	408.715	-0.613386	0.136134	-4.50575	6.61402e-06	0.000169444	3.77098	eif4g1a
ENSDARG00000051939	39.2189	1.4975	0.332613	4.50224	6.72416e-06	0.000171913	3.76469	pcxb
ENSDARG00000045516	60.2614	1.30879	0.290748	4.50145	6.74929e-06	0.000172203	3.76396	itih2
ENSDARG00000057484	214.497	-0.692231	0.154017	-4.49451	6.97304e-06	0.00017755	3.75068	srsf2a
ENSDARG00000104100	24.4581	1.72617	0.384211	4.49276	7.03064e-06	0.000178653	3.74799	bmpr1ba
ENSDARG00000098045	9.07103	-2.37676	0.529341	-4.49003	7.12143e-06	0.000180593	3.7433	-
ENSDARG00000006487	674.503	-0.604287	0.134922	-4.4788	7.50651e-06	0.000189973	3.72131	anp32a
ENSDARG00000011785	15.7091	2.14201	0.478472	4.47677	7.57804e-06	0.000191395	3.71807	tbx6
ENSDARG00000032317	139.79	-0.826961	0.184761	-4.47583	7.61133e-06	0.000191849	3.71704	tox
ENSDARG00000058451	3080.68	0.487517	0.109032	4.47134	7.77307e-06	0.000195531	3.70878	rpl6
ENSDARG00000040971	53.8558	1.64187	0.367334	4.4697	7.83297e-06	0.000196642	3.70632	zgc:92606
ENSDARG00000043453	1426.52	0.527833	0.118128	4.4683	7.88422e-06	0.000197532	3.70436	rps5
ENSDARG00000044565	165.264	0.783701	0.175676	4.46105	8.15583e-06	0.000203928	3.69052	ola1
ENSDARG00000056640	45.9873	1.40181	0.314278	4.46041	8.18046e-06	0.000204136	3.69008	rpia
ENSDARG00000011170	74.101	-1.18846	0.266476	-4.4599	8.19985e-06	0.000204212	3.68992	ndrg2
ENSDARG00000077906	44.3379	-1.1833	0.265572	-4.45568	8.36284e-06	0.000207857	3.68223	rnf165a
ENSDARG00000045316	26.7497	1.56263	0.350864	4.45368	8.44117e-06	0.000209388	3.67905	map7d2b
ENSDARG00000059836	18.8074	1.89866	0.426802	4.44857	8.64449e-06	0.000214007	3.66957	ddit3
ENSDARG00000078113	50.223	-1.10939	0.250007	-4.43745	9.10316e-06	0.000224916	3.64798	atp5ia
ENSDARG00000077533	164.54	0.822084	0.185365	4.43494	9.21e-06	0.000227107	3.64377	eif3f
ENSDARG00000032708	27.8067	1.481	0.334237	4.43098	9.38053e-06	0.000230284	3.63774	arl4cb
ENSDARG00000033683	645.531	-1.49049	0.336361	-4.43123	9.3696e-06	0.000230284	3.63774	tpma
ENSDARG00000099755	28.3451	1.63215	0.368375	4.43067	9.39409e-06	0.000230284	3.63774	pfklb
ENSDARG00000100558	113.469	-0.796659	0.179972	-4.42658	9.57408e-06	0.000234237	3.63034	slbp
ENSDARG00000013144	219.269	0.65434	0.147863	4.4253	9.63076e-06	0.000235164	3.62863	atp1b1a
ENSDARG00000100630	111.308	1.04584	0.236373	4.42453	9.66532e-06	0.000235547	3.62792	lye
ENSDARG00000093494	11.5061	2.20713	0.498998	4.42312	9.72853e-06	0.000236627	3.62594	-
ENSDARG00000006467	11.6632	2.29239	0.518476	4.4214	9.80642e-06	0.000237895	3.62361	pcdh8
ENSDARG00000076847	97.6158	-0.82842	0.187378	-4.42113	9.81874e-06	0.000237895	3.62361	tnrc6c1
ENSDARG00000052816	82.24	0.924554	0.209216	4.41913	9.90974e-06	0.000239635	3.62045	shmt1
ENSDARG00000077855	12.7337	2.14773	0.486611	4.41365	1.01642e-05	0.000245315	3.61028	znrf2a
ENSDARG00000019763	19.72	1.84798	0.419385	4.40639	1.05106e-05	0.000253185	3.59656	acp5a
ENSDARG00000060771	64.7712	-1.01807	0.231226	-4.40293	1.06801e-05	0.000256774	3.59045	map7d3
ENSDARG00000076693	3.89012	-2.81909	0.640406	-4.40203	1.07241e-05	0.000257338	3.5895	crygm2d19
ENSDARG00000078859	6.5977	2.65951	0.604363	4.40053	1.07989e-05	0.000258635	3.58731	g0s2
ENSDARG00000017299	118.445	-0.78575	0.17862	-4.399	1.0875e-05	0.00025996	3.58509	fabp11a
ENSDARG00000019963	16.5816	1.85469	0.421939	4.39563	1.10454e-05	0.000263529	3.57917	sfxn1
ENSDARG00000016153	318.912	0.649942	0.147907	4.39425	1.11155e-05	0.000264697	3.57725	dag1
ENSDARG00000104181	146.798	0.906961	0.206693	4.38795	1.14423e-05	0.000271961	3.56549	tmsb1
ENSDARG00000054320	153.178	-0.703986	0.160588	-4.38379	1.1663e-05	0.000276157	3.55884	ap2a1
ENSDARG00000103846	194.758	0.723482	0.165033	4.38385	1.166e-05	0.000276157	3.55884	hspa5
ENSDARG00000045887	5.01183	2.79268	0.637251	4.38238	1.17389e-05	0.00027704	3.55746	mmp30
ENSDARG00000070922	560.046	-0.549784	0.125456	-4.38228	1.17446e-05	0.00027704	3.55746	cnbpb
ENSDARG00000054818	1547.66	0.540654	0.123638	4.37288	1.22616e-05	0.000288147	3.54039	rpl32
ENSDARG00000104066	227.268	-0.640289	0.146419	-4.37299	1.22558e-05	0.000288147	3.54039	-
ENSDARG00000092947	2949.88	0.594966	0.136107	4.37132	1.23498e-05	0.000289676	3.53809	cyt1
ENSDARG00000075931	11.9578	2.09091	0.478498	4.36972	1.24403e-05	0.000291253	3.53573	acsl5
ENSDARG00000060010	55.973	1.10469	0.252948	4.36727	1.25808e-05	0.000293992	3.53166	iqgap2
ENSDARG00000088813	44.5157	1.24617	0.285477	4.36524	1.26984e-05	0.000296186	3.52843	ppp1r3ab
ENSDARG00000035563	62.9258	1.11293	0.255026	4.36399	1.27711e-05	0.000297326	3.52677	znf703
ENSDARG00000059109	38.4783	1.25075	0.286928	4.35912	1.30588e-05	0.000303458	3.5179	si:dkeyp-113d7.1
ENSDARG00000104587	172.912	-0.890627	0.204383	-4.35765	1.31469e-05	0.00030494	3.51579	srl
ENSDARG00000007241	39.0086	1.23935	0.284682	4.35347	1.33999e-05	0.000310233	3.50831	mycb
ENSDARG00000006837	467.239	0.672725	0.154699	4.34862	1.36998e-05	0.00031659	3.4995	mycn
ENSDARG00000022165	20.6305	1.68371	0.38741	4.34606	1.38605e-05	0.000319713	3.49524	mgst1.2
ENSDARG00000007891	42.3332	1.38822	0.319667	4.34269	1.40749e-05	0.000324059	3.48938	meox1
ENSDARG00000033367	13.2977	2.10608	0.485292	4.33982	1.42601e-05	0.000327119	3.48529	rrm2b
ENSDARG00000103774	36.2832	1.37159	0.316045	4.33986	1.4257e-05	0.000327119	3.48529	limch1b
ENSDARG00000002967	70.2058	1.15387	0.266063	4.33682	1.44556e-05	0.000330995	3.48018	pdap1b
ENSDARG00000015575	9.75252	2.32762	0.536846	4.33573	1.45279e-05	0.000332044	3.4788	cyp3c1
ENSDARG00000035859	24.3487	1.74433	0.402384	4.33498	1.45775e-05	0.000332569	3.47812	angptl4
ENSDARG00000004132	60.4001	-0.991605	0.228847	-4.33304	1.47067e-05	0.000334905	3.47508	usp19
ENSDARG00000011027	78.8456	1.0013	0.231113	4.3325	1.47428e-05	0.000335117	3.4748	fgfr1a
ENSDARG00000100392	2773.22	0.438026	0.10124	4.32662	1.51414e-05	0.000343553	3.46401	-
ENSDARG00000056986	37.8909	1.58829	0.367189	4.32553	1.52166e-05	0.000344633	3.46264	dact2
ENSDARG00000020893	96.1982	-0.949757	0.220145	-4.31423	1.6016e-05	0.000362082	3.44119	slc25a22
ENSDARG00000014867	1792.69	0.445165	0.10324	4.31193	1.61833e-05	0.000365206	3.43746	rpl8
ENSDARG00000103316	170.161	0.815764	0.189208	4.31146	1.6218e-05	0.000365329	3.43732	si:ch211-212k18.5
ENSDARG00000017841	168.223	-0.767268	0.178119	-4.30762	1.65018e-05	0.000371052	3.43057	cand1
ENSDARG00000041623	77.8915	1.3304	0.309137	4.3036	1.68045e-05	0.00037718	3.42345	mt2; mt
ENSDARG00000105117	127.066	0.788934	0.183388	4.302	1.69262e-05	0.000379232	3.42109	sdad1
ENSDARG00000013250	258.549	0.987299	0.229609	4.29991	1.70864e-05	0.000382137	3.41778	tars
ENSDARG00000000212	120.636	0.770925	0.17931	4.29939	1.71266e-05	0.000382352	3.41754	krt97
ENSDARG00000045815	30.2516	-1.5028	0.350195	-4.29132	1.77612e-05	0.000395813	3.40251	mcm10
ENSDARG00000045373	306.464	-0.556152	0.129628	-4.29038	1.78367e-05	0.000396788	3.40144	pabpn1
ENSDARG00000038068	108.565	-1.00286	0.233784	-4.2897	1.78917e-05	0.000397303	3.40088	ddx5
ENSDARG00000042780	261.081	0.774961	0.180754	4.28739	1.80783e-05	0.000400735	3.39714	apoba
ENSDARG00000027750	22.7305	1.62333	0.379114	4.28191	1.85295e-05	0.00041001	3.38721	dpp7
ENSDARG00000013628	121.74	0.852809	0.199193	4.28132	1.85792e-05	0.000410384	3.38681	cd164
ENSDARG00000001220	131.028	-0.799348	0.187004	-4.2745	1.91569e-05	0.000422398	3.37428	mycbp2
ENSDARG00000017445	326.818	0.618948	0.144983	4.26911	1.96258e-05	0.000431976	3.36454	eif3i
ENSDARG00000074183	12.0272	2.14049	0.50169	4.26655	1.98515e-05	0.000436175	3.36034	si:dkey-172j4.3
ENSDARG00000067838	71.3954	1.11725	0.261935	4.26538	1.99559e-05	0.000437699	3.35882	riox1
ENSDARG00000060796	137.334	0.785374	0.184279	4.26188	2.02717e-05	0.000443847	3.35277	slc20a2
ENSDARG00000068732	52.7911	1.16408	0.273234	4.26038	2.04076e-05	0.000446041	3.35063	spry4
ENSDARG00000015325	118.775	0.842885	0.197872	4.25976	2.04651e-05	0.000446517	3.35016	u2af1
ENSDARG00000104034	112.966	0.913322	0.214861	4.25075	2.13055e-05	0.000464044	3.33344	arid3b
ENSDARG00000030053	224.905	0.641067	0.150946	4.24699	2.16664e-05	0.000471084	3.3269	eef1db
ENSDARG00000008703	26.6865	1.58478	0.37324	4.24602	2.17601e-05	0.0004723	3.32578	-
ENSDARG00000015915	27.3531	1.44524	0.340652	4.24257	2.20978e-05	0.0004788	3.31985	slc25a36b
ENSDARG00000005526	30.2125	-1.70082	0.401188	-4.23947	2.24045e-05	0.000484603	3.31461	igfn1.1
ENSDARG00000019181	2193.82	0.468214	0.110462	4.23869	2.2483e-05	0.000485462	3.31384	rpsa
ENSDARG00000009136	45.7182	1.1582	0.273544	4.23407	2.29502e-05	0.000492275	3.30779	tp53bp2a
ENSDARG00000013804	55.7455	1.15999	0.273992	4.23367	2.29909e-05	0.000492275	3.30779	capns1b
ENSDARG00000038141	149.04	0.864555	0.204208	4.2337	2.29873e-05	0.000492275	3.30779	atf4b
ENSDARG00000060594	35.3958	-1.3044	0.308004	-4.23501	2.28545e-05	0.000492275	3.30779	hadhab
ENSDARG00000099449	59.1222	-1.06238	0.250939	-4.23362	2.29954e-05	0.000492275	3.30779	-
ENSDARG00000059711	41.0649	1.1987	0.283673	4.22564	2.38258e-05	0.000509179	3.29313	nol6
ENSDARG00000103919	2880.73	-0.411049	0.0973377	-4.22292	2.41158e-05	0.000514498	3.28862	si:ch73-1a9.3
ENSDARG00000045155	23.9621	-1.41459	0.335131	-4.22102	2.43202e-05	0.000517975	3.28569	phf5a
ENSDARG00000032496	9.03472	2.33135	0.552515	4.21952	2.44819e-05	0.000520532	3.28355	pon1
ENSDARG00000018426	28.1083	-1.39688	0.331194	-4.21772	2.46784e-05	0.000523312	3.28124	aldh7a1
ENSDARG00000088411	6.91302	-2.44093	0.578754	-4.21756	2.46964e-05	0.000523312	3.28124	notum2
ENSDARG00000056314	29.9336	1.37176	0.32641	4.20256	2.63917e-05	0.00055829	3.25314	a2ml
ENSDARG00000058538	103.801	0.843446	0.200906	4.19821	2.69027e-05	0.000568139	3.24555	alcamb
ENSDARG00000053129	42.797	1.1897	0.283786	4.19226	2.76194e-05	0.000582291	3.23486	carhsp1
ENSDARG00000086411	35.1772	1.3381	0.319273	4.19109	2.77618e-05	0.000584307	3.23336	srsf10b
ENSDARG00000102105	63.5477	1.14847	0.274082	4.19023	2.78672e-05	0.000585539	3.23244	dad1
ENSDARG00000055539	20.0961	1.85981	0.444627	4.18287	2.87852e-05	0.000603812	3.2191	epdl2
ENSDARG00000058206	12.1236	2.1263	0.508434	4.18205	2.88897e-05	0.000604989	3.21825	si:ch211-153b23.5
ENSDARG00000025147	48.9867	1.35444	0.32411	4.17895	2.92864e-05	0.000612273	3.21305	cd63
ENSDARG00000051800	57.2276	-1.06188	0.254173	-4.17779	2.94351e-05	0.000614353	3.21158	fnbp4
ENSDARG00000008788	7.49599	2.41393	0.5786	4.17202	3.01915e-05	0.000628044	3.20201	camk1gb
ENSDARG00000077388	29.7982	-1.40606	0.336999	-4.17229	3.01556e-05	0.000628044	3.20201	-
ENSDARG00000015088	36.6045	-1.2076	0.289751	-4.16771	3.0767e-05	0.000638951	3.19453	dnajb11
ENSDARG00000034291	1894.37	0.514437	0.12347	4.16649	3.09328e-05	0.00064133	3.19292	rpl37
ENSDARG00000013475	416.488	0.587906	0.141226	4.16286	3.14281e-05	0.000649446	3.18746	cct4
ENSDARG00000077559	30.8995	1.69864	0.408025	4.16308	3.13987e-05	0.000649446	3.18746	LOC792958
ENSDARG00000000503	107.199	-0.783955	0.188431	-4.16044	3.1764e-05	0.000655304	3.18356	stx1b
ENSDARG00000100402	14.8963	-1.74327	0.4191	-4.15956	3.18866e-05	0.000656749	3.1826	fgd1
ENSDARG00000100442	20.7863	1.58312	0.380814	4.15718	3.22195e-05	0.000662513	3.17881	cfh
ENSDARG00000014201	17.5493	-1.66385	0.400272	-4.1568	3.22736e-05	0.000662536	3.17879	otpa
ENSDARG00000039579	7.99243	2.44345	0.588001	4.15552	3.24543e-05	0.000665154	3.17708	cfd
ENSDARG00000062341	3.58846	-2.66982	0.643247	-4.15054	3.31697e-05	0.000678703	3.16832	wfs1a
ENSDARG00000030583	41.9157	1.21095	0.291887	4.1487	3.34373e-05	0.000683061	3.16554	foxk2
ENSDARG00000077139	5.96008	-2.41184	0.581979	-4.14421	3.40986e-05	0.000695434	3.15774	-
ENSDARG00000011079	57.4424	1.0039	0.242448	4.14065	3.46316e-05	0.000705154	3.15172	wdr3
ENSDARG00000045064	49.9077	1.05825	0.255737	4.13803	3.50301e-05	0.000712108	3.14745	ablim1b
ENSDARG00000059809	84.4149	0.882548	0.213349	4.13665	3.52415e-05	0.000715241	3.14555	caskb; caska
ENSDARG00000039669	27.8104	1.38271	0.33429	4.13627	3.52996e-05	0.00071526	3.14554	zgc:100864
ENSDARG00000002791	98.7528	0.865474	0.209273	4.13562	3.53999e-05	0.000716132	3.14501	atp1a1a.1
ENSDARG00000035993	208.332	-0.676841	0.163738	-4.13368	3.56999e-05	0.000721035	3.14204	sumo3b
ENSDARG00000016733	59.9594	1.47063	0.356053	4.13035	3.62204e-05	0.000730366	3.13646	psat1
ENSDARG00000099996	38.6882	-1.25927	0.305189	-4.12622	3.68781e-05	0.000742432	3.12934	rhot1a
ENSDARG00000055945	515.84	0.602196	0.146394	4.11353	3.89649e-05	0.000783183	3.10614	asph
ENSDARG00000015559	92.3493	0.899481	0.218769	4.11155	3.93012e-05	0.000788674	3.1031	fstl1a
ENSDARG00000071691	50.7843	-1.04731	0.25479	-4.1105	3.94805e-05	0.000790777	3.10195	uqcrc2b
ENSDARG00000103347	22.1043	1.66617	0.405375	4.11019	3.95325e-05	0.000790777	3.10195	cyp2aa3
ENSDARG00000036670	14.2872	1.94651	0.473812	4.10818	3.98786e-05	0.000796425	3.09886	aplnrb
ENSDARG00000035327	356.246	-1.45417	0.354192	-4.10558	4.03293e-05	0.000804142	3.09467	ckma
ENSDARG00000093195	21.6743	-1.48404	0.361502	-4.1052	4.03963e-05	0.000804196	3.09464	si:dkey-261m9.6
ENSDARG00000009438	23.0791	1.5197	0.370489	4.10187	4.09817e-05	0.000814553	3.08908	myog
ENSDARG00000002587	54.3074	-1.0113	0.246799	-4.09766	4.17341e-05	0.00082819	3.08187	dpysl3
ENSDARG00000003189	168.513	-0.702059	0.171402	-4.09597	4.20397e-05	0.000832932	3.07939	psmd1
ENSDARG00000008447	63.9736	-0.962273	0.235491	-4.08623	4.38432e-05	0.000863194	3.06389	fkbp4
ENSDARG00000010571	96.0185	-0.896274	0.21933	-4.08642	4.38082e-05	0.000863194	3.06389	ezh2
ENSDARG00000022309	102.475	0.824909	0.201874	4.08627	4.38371e-05	0.000863194	3.06389	dspa
ENSDARG00000058820	64.5421	-1.07803	0.263764	-4.08709	4.36817e-05	0.000863194	3.06389	bin1b
ENSDARG00000091996	23.731	1.51982	0.372194	4.0834	4.43809e-05	0.000872406	3.05928	si:ch211-117m20.5
ENSDARG00000010207	10.9993	-1.97077	0.482722	-4.08261	4.45336e-05	0.000874033	3.05847	smad3b
ENSDARG00000054723	107.554	-0.838479	0.205588	-4.07844	4.53386e-05	0.000888438	3.05137	si:ch211-242b18.1
ENSDARG00000003835	106.4	0.872786	0.214093	4.07666	4.56872e-05	0.000892471	3.04941	stom
ENSDARG00000004939	106.952	-0.873269	0.214211	-4.07668	4.56833e-05	0.000892471	3.04941	mtdhb
ENSDARG00000036698	213.013	-0.695659	0.17086	-4.07151	4.67086e-05	0.000911001	3.04048	znf865
ENSDARG00000002333	3.59945	-2.62163	0.644114	-4.07014	4.69856e-05	0.000914976	3.03859	fam102bb
ENSDARG00000105208	6.98858	2.34747	0.576811	4.06973	4.70676e-05	0.000915146	3.03851	zgc:85843
ENSDARG00000092337	180.188	0.784321	0.192931	4.06529	4.79733e-05	0.000931308	3.03091	-
ENSDARG00000103937	10.4897	-2.01159	0.495041	-4.06348	4.83468e-05	0.000937103	3.02821	ndrg4
ENSDARG00000030110	53.2569	1.08267	0.266525	4.06215	4.86222e-05	0.000940983	3.02642	myod1
ENSDARG00000069817	3.5971	-2.61616	0.644199	-4.0611	4.88418e-05	0.000943772	3.02513	crygm2d8; zgc:173645
ENSDARG00000099745	98.6045	-0.783917	0.193181	-4.05794	4.95083e-05	0.000955174	3.01992	-
ENSDARG00000035909	12.4885	-1.86085	0.458875	-4.05524	5.00829e-05	0.000964772	3.01558	mfsd2ab
ENSDARG00000071658	36.5336	-1.23958	0.306013	-4.05075	5.10531e-05	0.000981948	3.00791	ywhag2
ENSDARG00000060297	51.9153	-0.987301	0.243805	-4.04956	5.13142e-05	0.000985454	3.00636	arhgap35b
ENSDARG00000044267	58.4502	0.961265	0.237455	4.0482	5.16124e-05	0.000988146	3.00518	sumo1
ENSDARG00000071467	40.2036	-1.08897	0.269001	-4.0482	5.16125e-05	0.000988146	3.00518	zbtb33
ENSDARG00000057911	21.9315	1.52983	0.377978	4.04741	5.17867e-05	0.000989966	3.00438	zgc:86709
ENSDARG00000006385	5.51874	2.45965	0.609157	4.03779	5.39575e-05	0.00102989	2.98721	-
ENSDARG00000078214	296.443	0.631025	0.156299	4.03729	5.40732e-05	0.00103052	2.98694	mybbp1a
ENSDARG00000043509	1113.46	0.48345	0.119788	4.03588	5.43973e-05	0.00103512	2.98501	rpl11
ENSDARG00000067741	19.9185	1.59409	0.395139	4.03426	5.47744e-05	0.00103933	2.98325	-
ENSDARG00000092609	68.507	1.00716	0.249656	4.03422	5.47849e-05	0.00103933	2.98325	aup1
ENSDARG00000071445	10.7879	-2.11766	0.525723	-4.02808	5.6233e-05	0.00106519	2.97257	myoz1b
ENSDARG00000055996	1077.67	0.416177	0.103343	4.02712	5.64641e-05	0.00106795	2.97145	rps8a
ENSDARG00000012215	24.0166	1.47355	0.366143	4.02452	5.70911e-05	0.00107818	2.96731	umps
ENSDARG00000103672	2825.96	-0.398599	0.0991436	-4.02042	5.80945e-05	0.00109547	2.9604	cirbpa
ENSDARG00000025535	138.003	0.712537	0.177265	4.01962	5.82921e-05	0.00109754	2.95958	clint1a
ENSDARG00000011648	230.814	0.605254	0.15062	4.01841	5.85921e-05	0.00110153	2.958	snrpd1
ENSDARG00000020164	223.543	0.647159	0.161434	4.00881	6.10249e-05	0.00114555	2.94099	efnb2a
ENSDARG00000016496	79.4406	-0.841943	0.210054	-4.00823	6.11767e-05	0.00114667	2.94056	cdk8
ENSDARG00000042566	1109.21	0.471906	0.117878	4.00335	6.24519e-05	0.00116708	2.9329	rps7
ENSDARG00000099499	221.463	0.593313	0.148203	4.00339	6.24415e-05	0.00116708	2.9329	ndufa4l
ENSDARG00000001994	124.861	-0.753449	0.188576	-3.99547	6.45648e-05	0.00120476	2.9191	stxbp1a
ENSDARG00000070337	28.6783	-1.32074	0.330838	-3.99209	6.54931e-05	0.00122026	2.91355	hoxc1a
ENSDARG00000089698	14.8728	-1.66404	0.417868	-3.98222	6.82757e-05	0.00127021	2.89612	atf7ip2
ENSDARG00000094729	22.8035	1.78786	0.449882	3.97405	7.06594e-05	0.00131261	2.88187	apela
ENSDARG00000023318	3.27687	-2.56085	0.644612	-3.97271	7.10602e-05	0.00131419	2.88134	fmn2a
ENSDARG00000073872	12.5488	1.9099	0.480743	3.9728	7.10318e-05	0.00131419	2.88134	tpst1
ENSDARG00000099312	247.496	-0.66274	0.16681	-3.97302	7.09659e-05	0.00131419	2.88134	jpt1b
ENSDARG00000033738	162.05	0.699451	0.17628	3.96784	7.25265e-05	0.00133933	2.87311	zgc:153867
ENSDARG00000039914	77.7885	1.05328	0.265592	3.96576	7.31617e-05	0.00134708	2.87061	gapdhs
ENSDARG00000092035	59.6917	-1.03517	0.261004	-3.9661	7.3057e-05	0.00134708	2.87061	si:ch211-156j16.1
ENSDARG00000054823	79.4623	0.995731	0.251147	3.96473	7.34792e-05	0.00135094	2.86936	id3
ENSDARG00000095897	188.047	-0.62778	0.158638	-3.9573	7.58002e-05	0.00139156	2.8565	atp5e
ENSDARG00000058088	25.6933	-1.49049	0.37678	-3.95587	7.62555e-05	0.00139787	2.85453	aifm1
ENSDARG00000090697	234.665	0.599905	0.151805	3.95182	7.75581e-05	0.00141967	2.84781	eif3ea
ENSDARG00000017901	80.407	-0.785667	0.199024	-3.94759	7.89402e-05	0.00144285	2.84078	tln2a
ENSDARG00000098431	45.9316	1.09835	0.27841	3.94507	7.97755e-05	0.00145599	2.83684	comp
ENSDARG00000005926	101.394	0.853055	0.216449	3.94113	8.10977e-05	0.00147796	2.83034	ak2
ENSDARG00000028086	25.5408	1.36466	0.346637	3.93684	8.25621e-05	0.00150246	2.8232	-
ENSDARG00000052942	8.23413	2.20505	0.560171	3.93639	8.27178e-05	0.00150311	2.82301	aspg
ENSDARG00000055278	17.4891	1.68751	0.429039	3.93323	8.38104e-05	0.00151855	2.81857	cfb
ENSDARG00000078557	3.13648	-2.53607	0.644771	-3.9333	8.37889e-05	0.00151855	2.81857	si:ch211-57n23.4
ENSDARG00000062936	35.8911	1.18706	0.301864	3.93245	8.40847e-05	0.00152131	2.81778	ndnf
ENSDARG00000045402	16.2516	1.71607	0.436477	3.93164	8.43676e-05	0.00152422	2.81695	commd3
ENSDARG00000040059	19.0931	1.65342	0.420591	3.93119	8.4527e-05	0.0015249	2.81676	gbp
ENSDARG00000074635	22.4514	-1.55765	0.396264	-3.93083	8.46518e-05	0.00152495	2.81674	abca1a
ENSDARG00000089441	113.83	0.770149	0.196081	3.9277	8.57606e-05	0.00153828	2.81297	si:ch211-105c13.3
ENSDARG00000103271	17.317	1.70085	0.433032	3.92777	8.57366e-05	0.00153828	2.81297	-
ENSDARG00000105397	9.58379	-1.95239	0.497006	-3.9283	8.55468e-05	0.00153828	2.81297	si:dkey-23a13.8
ENSDARG00000000069	61.6189	0.977006	0.248886	3.92552	8.65441e-05	0.00154617	2.81074	dap
ENSDARG00000101557	9.46846	2.03953	0.519509	3.92588	8.64146e-05	0.00154617	2.81074	scarb1
ENSDARG00000103277	3.91489	2.52066	0.642135	3.92544	8.65718e-05	0.00154617	2.81074	cyp24a1
ENSDARG00000004363	5.51626	2.4107	0.614334	3.92408	8.70602e-05	0.00155268	2.80892	lhfpl6
ENSDARG00000067964	8.16691	-2.16454	0.552289	-3.91922	8.88364e-05	0.0015821	2.80077	slc6a5
ENSDARG00000006624	42.9956	-1.0706	0.27324	-3.91816	8.92286e-05	0.00158682	2.79947	ppp2r2ab
ENSDARG00000024047	54.89	-0.952992	0.243433	-3.91481	9.04761e-05	0.00160672	2.79406	tmem38a
ENSDARG00000097635	108.646	0.834233	0.213306	3.91097	9.19258e-05	0.00163015	2.78777	-
ENSDARG00000100317	40.793	-1.16103	0.296926	-3.91017	9.22308e-05	0.00163324	2.78695	ahsa1b
ENSDARG00000060016	97.7771	-0.760433	0.194727	-3.90511	9.41813e-05	0.00166542	2.77848	nsd1a
ENSDARG00000101816	7.49645	-2.18325	0.55915	-3.90458	9.439e-05	0.00166676	2.77813	col5a3b
ENSDARG00000102802	56.5524	1.02876	0.263592	3.90285	9.50682e-05	0.00167637	2.77563	brdt
ENSDARG00000075849	81.6712	-0.871102	0.223502	-3.89751	9.71861e-05	0.0017113	2.76667	prr12b
ENSDARG00000078882	12.1393	1.88025	0.482641	3.89576	9.78893e-05	0.00171884	2.76477	slc22a31
ENSDARG00000092290	32.256	-1.20663	0.309701	-3.8961	9.77528e-05	0.00171884	2.76477	si:dkeyp-26a9.2
ENSDARG00000038585	46.7292	-1.13358	0.291144	-3.89355	9.87865e-05	0.00173216	2.76141	eif4e2
ENSDARG00000102153	101.475	0.823439	0.211531	3.89275	9.91147e-05	0.00173548	2.76058	nrp1a
ENSDARG00000088789	15.5114	1.81198	0.465571	3.89196	9.94375e-05	0.0017387	2.75978	mast1b
ENSDARG00000044774	4.69338	2.44852	0.629499	3.88963	0.000100396	0.00175301	2.75622	pou5f3
ENSDARG00000088439	21.6996	1.49236	0.384278	3.88353	0.000102949	0.00179507	2.74592	gm2a
ENSDARG00000045485	49.7309	1.15544	0.297712	3.88108	0.000103992	0.00180882	2.7426	rassf8b
ENSDARG00000104540	25.2204	1.58109	0.407392	3.881	0.000104027	0.00180882	2.7426	-
ENSDARG00000058448	36.3258	-1.10875	0.286036	-3.87627	0.000106071	0.00184181	2.73476	zrsr2
ENSDARG00000025397	126.937	-0.773434	0.199863	-3.86982	0.000108916	0.00188858	2.72386	srsf3a
ENSDARG00000014420	220.641	-0.535454	0.138452	-3.86744	0.000109983	0.00190444	2.72023	elavl3
ENSDARG00000038066	201.627	-0.647682	0.167542	-3.86579	0.000110729	0.0019147	2.7179	kpna2
ENSDARG00000035622	293.093	0.716447	0.185476	3.86275	0.000112118	0.00193605	2.71308	-
ENSDARG00000058179	18.7865	1.50827	0.390741	3.86003	0.000113371	0.00195499	2.70886	ackr3b
ENSDARG00000070427	48.4044	1.11506	0.28897	3.85876	0.000113963	0.00196248	2.70719	s100v1
ENSDARG00000004296	10.861	1.99068	0.516252	3.85601	0.000115252	0.00197652	2.7041	ambp
ENSDARG00000053291	1018.74	0.400119	0.103757	3.85629	0.000115122	0.00197652	2.7041	pnrc2
ENSDARG00000083519	302.617	-0.673263	0.174573	-3.85663	0.000114962	0.00197652	2.7041	-
ENSDARG00000029150	6625.3	0.476865	0.123682	3.85558	0.000115453	0.00197725	2.70394	hsp90ab1
ENSDARG00000035340	5.38257	-2.26089	0.586895	-3.85228	0.000117022	0.00200138	2.69867	gjd1a
ENSDARG00000030722	61.4132	1.12302	0.291644	3.85066	0.000117798	0.00201189	2.6964	xirp1
ENSDARG00000101043	276.001	0.554935	0.144154	3.84959	0.000118314	0.00201795	2.69509	ppl
ENSDARG00000005791	1420.81	0.466938	0.121356	3.84768	0.000119244	0.00202828	2.69287	rpl28
ENSDARG00000073905	9.16835	2.08352	0.541479	3.84783	0.000119166	0.00202828	2.69287	-
ENSDARG00000036074	14.6695	1.84749	0.4804	3.84573	0.000120194	0.00204166	2.69002	cebpa
ENSDARG00000076317	48.6703	1.04048	0.270645	3.84444	0.000120827	0.00204964	2.68832	plod3
ENSDARG00000005989	39.6999	1.35125	0.352143	3.83721	0.000124439	0.00210804	2.67612	rgl1
ENSDARG00000100143	17.6456	1.55415	0.405241	3.83513	0.000125498	0.00212311	2.67303	-
ENSDARG00000031774	17.5053	1.49783	0.390632	3.83438	0.00012588	0.0021267	2.67229	pus7
ENSDARG00000018492	32.4736	1.30731	0.340991	3.83387	0.000126145	0.0021283	2.67197	znf503
ENSDARG00000060868	55.57	-0.903297	0.235636	-3.83345	0.00012636	0.00212905	2.67181	mbtd1
ENSDARG00000044914	20.4539	1.47612	0.385773	3.8264	0.000130033	0.00218799	2.65996	suclg2
ENSDARG00000079326	37.9049	-1.09412	0.285999	-3.8256	0.000130454	0.00219212	2.65914	-
ENSDARG00000055046	9.31816	2.01284	0.526848	3.82053	0.000133167	0.00223469	2.65078	ponzr5
ENSDARG00000009280	17.2006	-1.58424	0.414842	-3.8189	0.000134049	0.00224649	2.6485	smyd1a
ENSDARG00000096359	63.5474	0.946877	0.248532	3.80988	0.000139037	0.00232696	2.63321	eppk1
ENSDARG00000101407	29.8158	1.26705	0.33271	3.80828	0.000139937	0.0023389	2.63099	tgm1l4
ENSDARG00000032103	30.0822	-1.32438	0.348008	-3.80561	0.000141455	0.00236111	2.62688	mapk6
ENSDARG00000057234	84.1178	-0.837061	0.220248	-3.80054	0.00014438	0.00240672	2.61857	chtopa
ENSDARG00000028507	46.6307	-1.01414	0.266944	-3.79908	0.000145235	0.00241774	2.61659	itgb4
ENSDARG00000017246	12.5102	-1.93238	0.508894	-3.79722	0.000146328	0.00243271	2.61391	-
ENSDARG00000004754	39.9775	-1.34597	0.354532	-3.79648	0.000146763	0.00243558	2.6134	hspa4a
ENSDARG00000104945	68.5586	-0.993362	0.261668	-3.79627	0.000146891	0.00243558	2.6134	sncb
ENSDARG00000011201	3205.33	0.386772	0.101953	3.79363	0.000148463	0.00245839	2.60935	rplp2l
ENSDARG00000097478	668.762	0.440272	0.116246	3.7874	0.00015223	0.00251744	2.59904	qkia
ENSDARG00000040046	30.0407	1.18098	0.311963	3.78565	0.00015331	0.00253195	2.59655	snai2
ENSDARG00000006316	2175.43	0.389857	0.102998	3.78511	0.000153641	0.00253407	2.59618	rpl23a
ENSDARG00000058366	12.5663	1.83211	0.484539	3.78113	0.000156115	0.00257148	2.58982	si:dkey-222f8.3
ENSDARG00000102589	17.0729	-1.60445	0.424582	-3.7789	0.000157526	0.0025913	2.58648	-
ENSDARG00000061735	100.041	-0.702971	0.186188	-3.7756	0.000159624	0.00262236	2.58131	hnrnpm
ENSDARG00000025641	72.7895	0.860838	0.228772	3.76286	0.000167981	0.00275604	2.55972	gli2a
ENSDARG00000098711	15.665	-1.53359	0.407654	-3.762	0.000168559	0.0027619	2.55879	-
ENSDARG00000010873	71.3659	0.868406	0.231022	3.75898	0.000170605	0.00279176	2.55412	si:dkey-156n14.5
ENSDARG00000002758	43.3675	1.14339	0.304369	3.7566	0.000172239	0.00280748	2.55168	dedd1
ENSDARG00000014817	414.378	-0.479905	0.127737	-3.75698	0.000171979	0.00280748	2.55168	ranbp1
ENSDARG00000062634	6.24287	-2.17275	0.578368	-3.75669	0.000172174	0.00280748	2.55168	kat2b
ENSDARG00000037397	230.806	-0.558199	0.148629	-3.75565	0.000172891	0.00281443	2.55061	ssrp1a
ENSDARG00000099514	44.5494	-1.0284	0.274011	-3.75315	0.00017463	0.00283904	2.54683	zgc:112234; si:dkey-23a13.5
ENSDARG00000033655	59.0972	-1.02195	0.272667	-3.74796	0.000178276	0.00289455	2.53842	stmn1b
ENSDARG00000097746	14.4701	1.63149	0.435897	3.74283	0.000181959	0.00295052	2.5301	si:rp71-77l1.1
ENSDARG00000052652	41.171	1.14919	0.307144	3.74152	0.000182909	0.00295825	2.52896	fermt1
ENSDARG00000100952	15.47	1.65307	0.441803	3.74164	0.00018282	0.00295825	2.52896	wu:fj16a03
ENSDARG00000039093	46.3006	-1.03605	0.277039	-3.73971	0.000184234	0.00297583	2.52639	got1
ENSDARG00000019231	176.006	0.618534	0.165568	3.73582	0.000187101	0.00301616	2.52055	spna2
ENSDARG00000100582	153.067	0.701544	0.187796	3.73567	0.000187213	0.00301616	2.52055	si:ch211-195b11.3
ENSDARG00000014914	29.7917	1.18274	0.316921	3.73196	0.000189999	0.00305711	2.51469	lamp2
ENSDARG00000020015	27.8932	-1.27542	0.34188	-3.73061	0.000191016	0.00306887	2.51302	mrps33
ENSDARG00000100259	8.13493	-1.94862	0.52237	-3.73034	0.000191221	0.00306887	2.51302	si:dkey-23a13.1
ENSDARG00000003382	53.5185	0.959581	0.257361	3.72854	0.000192592	0.00307503	2.51215	cwc25
ENSDARG00000008403	23.0864	1.34355	0.360381	3.72815	0.000192889	0.00307503	2.51215	phospho1
ENSDARG00000042826	14.3995	1.97205	0.529023	3.72773	0.000193214	0.00307503	2.51215	egr2b
ENSDARG00000058297	67.4573	-0.982042	0.263453	-3.72758	0.000193327	0.00307503	2.51215	timm13
ENSDARG00000070157	24.982	-1.58471	0.42498	-3.72891	0.000192307	0.00307503	2.51215	tgm2a
ENSDARG00000080337	410334	0.471842	0.126572	3.72786	0.00019311	0.00307503	2.51215	-
ENSDARG00000100406	18.3878	1.55712	0.417551	3.72917	0.000192114	0.00307503	2.51215	zgc:112265
ENSDARG00000061479	23.8037	-1.25443	0.336867	-3.72382	0.000196228	0.0031172	2.50623	thsd7aa
ENSDARG00000003963	42.5211	1.05582	0.2838	3.72029	0.000198993	0.00315712	2.50071	traf4a
ENSDARG00000027109	150.262	-0.600603	0.16152	-3.71844	0.000200457	0.00317229	2.49863	zfr
ENSDARG00000070057	8.6375	2.09114	0.56233	3.7187	0.00020025	0.00317229	2.49863	si:dkey-69o16.5
ENSDARG00000100044	21.387	1.48625	0.399776	3.7177	0.000201044	0.00317757	2.49791	LOC108179070
ENSDARG00000011076	5.48385	-2.30532	0.620794	-3.71351	0.000204406	0.00322662	2.49125	zgc:91968
ENSDARG00000055475	495.386	0.531273	0.143171	3.71075	0.000206643	0.00325371	2.48762	rps27.2
ENSDARG00000058868	99.2003	-0.725492	0.1955	-3.71096	0.000206476	0.00325371	2.48762	apc
ENSDARG00000077456	87.951	-0.825455	0.222879	-3.70361	0.000212554	0.00334258	2.47592	zgc:110216
ENSDARG00000005867	58.6114	-0.945798	0.255443	-3.70259	0.000213413	0.00335188	2.47471	gon4l
ENSDARG00000005762	89.6611	0.749224	0.20247	3.70042	0.000215239	0.00337029	2.47233	col14a1a
ENSDARG00000007009	32.413	1.18209	0.319438	3.70052	0.000215158	0.00337029	2.47233	hoxa11b
ENSDARG00000013443	72.3271	0.980492	0.265014	3.69978	0.000215787	0.00337029	2.47233	atp6v1ba
ENSDARG00000025693	31.338	1.23163	0.332909	3.69961	0.000215934	0.00337029	2.47233	tmem9b
ENSDARG00000099397	9.4514	2.12054	0.57318	3.69961	0.000215927	0.00337029	2.47233	si:cabz01080295.1
ENSDARG00000090268	30.4094	-1.5211	0.411228	-3.69892	0.000216516	0.00337517	2.4717	krtt1c19e
ENSDARG00000089355	97.2808	-0.766268	0.207199	-3.69823	0.00021711	0.00338021	2.47106	si:dkeyp-121d4.3
ENSDARG00000030368	86.882	-0.846413	0.228924	-3.69735	0.000217862	0.00338771	2.47009	naa15b
ENSDARG00000095744	7.73538	2.02444	0.548193	3.69293	0.000221684	0.00344285	2.46308	si:dkey-269i1.4
ENSDARG00000042660	149.028	0.617611	0.167281	3.69206	0.000222449	0.00345044	2.46213	fam32a
ENSDARG00000063330	8.96176	-2.00551	0.543327	-3.69116	0.000223234	0.00345405	2.46167	mgat4a
ENSDARG00000086751	11.2857	-1.81856	0.492639	-3.69146	0.000222971	0.00345405	2.46167	LOC100334869; zgc:114046
ENSDARG00000036820	25.5688	1.28199	0.347733	3.68671	0.000227174	0.00351067	2.45461	mgll
ENSDARG00000009950	75.8981	0.857899	0.232776	3.68552	0.000228238	0.00352204	2.45321	edf1
ENSDARG00000060041	369.95	-0.505123	0.137086	-3.68471	0.000228967	0.00352204	2.45321	lig1
ENSDARG00000069118	61.6441	-0.870089	0.23614	-3.68463	0.000229037	0.00352204	2.45321	ppp2r5eb
ENSDARG00000076590	52.3898	-1.01515	0.275501	-3.68474	0.000228935	0.00352204	2.45321	-
ENSDARG00000035699	70.2844	-0.792218	0.215092	-3.68315	0.000230371	0.0035382	2.45122	srp19
ENSDARG00000101423	19.696	1.42507	0.386977	3.68258	0.00023089	0.00354182	2.45077	cyp2y3
ENSDARG00000013708	133.671	-0.67068	0.182238	-3.68023	0.00023302	0.00357012	2.44732	usp9
ENSDARG00000092945	4.35099	-2.27278	0.618013	-3.67756	0.000235474	0.00360329	2.4433	-
ENSDARG00000061436	8.0452	-2.01885	0.549206	-3.67594	0.000236975	0.003613	2.44213	col6a2
ENSDARG00000069342	61.281	-0.947527	0.257746	-3.67621	0.000236727	0.003613	2.44213	zgc:153115
ENSDARG00000104108	7.93721	2.03674	0.553991	3.67649	0.000236467	0.003613	2.44213	slco1d1
ENSDARG00000008380	142.221	-0.606293	0.164964	-3.6753	0.000237566	0.00361425	2.44198	brd7
ENSDARG00000075752	36.7899	-1.09067	0.296763	-3.67523	0.000237635	0.00361425	2.44198	myo18aa
ENSDARG00000016763	126.311	-0.679075	0.185042	-3.66983	0.000242708	0.00368617	2.43342	znf292a
ENSDARG00000069279	30.5504	1.36097	0.370878	3.66958	0.000242953	0.00368617	2.43342	elovl7a
ENSDARG00000070535	3.29436	2.3622	0.644378	3.66586	0.000246504	0.00373551	2.42765	ripply2
ENSDARG00000056167	84.3471	1.0008	0.273224	3.66294	0.000249336	0.00377385	2.42322	hspe1
ENSDARG00000020178	6.75944	-2.13153	0.582221	-3.66103	0.000251205	0.00379754	2.4205	nova1
ENSDARG00000004452	206.455	-0.542754	0.148324	-3.65925	0.000252951	0.0038147	2.41854	tardbpl
ENSDARG00000014106	57.5701	-1.02617	0.280423	-3.65935	0.000252855	0.0038147	2.41854	cfl2
ENSDARG00000016793	6.67546	-2.16788	0.592623	-3.65811	0.000254077	0.00382708	2.41713	crybb1l2
ENSDARG00000102855	120.09	0.62982	0.172211	3.65725	0.000254935	0.00383538	2.41619	neo1a
ENSDARG00000062765	171.489	-0.598473	0.163843	-3.65272	0.000259475	0.00389899	2.40905	whsc1l1
ENSDARG00000076962	16.5789	1.60868	0.440499	3.65196	0.000260247	0.0039059	2.40828	gdpd5b
ENSDARG00000056028	3.70144	-2.33551	0.640343	-3.64728	0.00026503	0.00397291	2.40089	slc22a7a
ENSDARG00000009341	22.5277	-1.3007	0.35679	-3.64555	0.000266822	0.00399215	2.39879	nrap
ENSDARG00000015355	11.9701	2.35489	0.645985	3.64542	0.000266953	0.00399215	2.39879	fosl1a
ENSDARG00000079497	3.58898	2.3505	0.644896	3.64478	0.000267623	0.00399739	2.39822	zgc:110340
ENSDARG00000102249	14.4077	1.63561	0.448808	3.64435	0.000268072	0.00399933	2.39801	-
ENSDARG00000019949	180.766	1.39082	0.381712	3.64365	0.000268803	0.00400545	2.39735	serpinh1b
ENSDARG00000009018	16.1853	1.52479	0.418843	3.64049	0.000272119	0.00404042	2.39357	rhbg
ENSDARG00000020007	404.136	-0.656514	0.180335	-3.64053	0.000272073	0.00404042	2.39357	col1a2
ENSDARG00000040401	36.0073	1.39605	0.383477	3.6405	0.000272106	0.00404042	2.39357	slc25a20
ENSDARG00000015907	37.5975	1.1122	0.3056	3.63939	0.000273282	0.00405288	2.39224	dcbld1
ENSDARG00000015537	6.21852	-2.09777	0.576878	-3.63641	0.00027646	0.00409514	2.38773	gad2
ENSDARG00000070809	25.2021	-1.33897	0.368489	-3.6337	0.000279391	0.00412878	2.38418	znf516
ENSDARG00000090716	87.667	-0.782354	0.215301	-3.63377	0.00027931	0.00412878	2.38418	cltcb
ENSDARG00000045814	14.4523	-1.5567	0.428704	-3.63117	0.000282144	0.00416454	2.38043	samm50
ENSDARG00000071259	44.8868	1.00294	0.276721	3.62436	0.000289682	0.00427076	2.36949	fbxo34
ENSDARG00000008969	40.025	1.1333	0.312798	3.62309	0.000291104	0.00428456	2.36809	fgb
ENSDARG00000081362	2.6914	-2.34043	0.646007	-3.62291	0.000291304	0.00428456	2.36809	-
ENSDARG00000018903	185.008	0.581789	0.160677	3.62086	0.00029362	0.00431356	2.36516	aimp2
ENSDARG00000011615	20.5669	-1.42444	0.393434	-3.62053	0.000294001	0.00431408	2.36511	mybpc3
ENSDARG00000019530	181.082	-0.534905	0.147788	-3.61941	0.000295274	0.00432602	2.36391	hdgfrp2
ENSDARG00000100718	6.17061	-2.04307	0.564507	-3.61921	0.000295506	0.00432602	2.36391	me2
ENSDARG00000074379	23.3431	-1.32434	0.366012	-3.6183	0.000296549	0.00433621	2.36289	knstrn
ENSDARG00000078604	20.9415	-1.38995	0.384369	-3.61619	0.000298975	0.00436657	2.35986	-
ENSDARG00000089737	277.451	0.710543	0.196615	3.61388	0.000301645	0.00440043	2.35651	zgc:163040; hist1h4l
ENSDARG00000071082	69.3161	1.99364	0.551798	3.61299	0.000302686	0.00441047	2.35551	p4ha1b
ENSDARG00000001129	137.234	-0.634378	0.175618	-3.61227	0.000303533	0.00441766	2.35481	dicer1
ENSDARG00000007960	686.364	-0.390367	0.108144	-3.6097	0.000306555	0.00445646	2.35101	hnrnpaba
ENSDARG00000017441	481.395	-1.49656	0.414649	-3.60923	0.000307112	0.00445937	2.35073	mylz3
ENSDARG00000010641	94.3891	0.817517	0.226556	3.60846	0.00030802	0.0044624	2.35043	slc20a1b
ENSDARG00000054864	100.743	0.673998	0.186783	3.60845	0.000308035	0.0044624	2.35043	aplp2
ENSDARG00000018259	46.9547	-0.999808	0.277234	-3.60636	0.000310517	0.00449316	2.34745	atp1a3a
ENSDARG00000091298	15.2315	-1.57064	0.435597	-3.60572	0.000311292	0.00449396	2.34737	pmela
ENSDARG00000102778	4.84432	2.23502	0.619848	3.60575	0.000311255	0.00449396	2.34737	fgf17
ENSDARG00000044365	9.80196	1.84314	0.511415	3.60399	0.000313366	0.00451868	2.34499	angptl3
ENSDARG00000038785	19.9353	-1.3021	0.361465	-3.60228	0.000315438	0.0045381	2.34313	abcf2a
ENSDARG00000092987	3.10898	2.32275	0.644792	3.60232	0.000315396	0.0045381	2.34313	zmat4a
ENSDARG00000070043	95.9671	0.790607	0.219513	3.60164	0.000316212	0.004544	2.34256	dars
ENSDARG00000043680	58.7579	-1.00493	0.279053	-3.60121	0.000316736	0.00454631	2.34234	ylpm1
ENSDARG00000010878	75.2196	0.808317	0.224555	3.59963	0.000318664	0.00456874	2.3402	cdkn1ca
ENSDARG00000059908	147.404	0.757265	0.210473	3.59791	0.00032078	0.0045938	2.33783	si:ch211-217k17.7
ENSDARG00000069559	9.66709	-1.84298	0.512566	-3.59559	0.000323657	0.00462971	2.33445	muc13a
ENSDARG00000078878	29.468	-1.31552	0.365967	-3.59464	0.000324843	0.00463606	2.33385	-
ENSDARG00000100596	35.4861	-1.36068	0.37852	-3.59475	0.000324709	0.00463606	2.33385	-
ENSDARG00000006615	10.5052	1.88801	0.525279	3.5943	0.000325263	0.00463675	2.33379	hnf1ba
ENSDARG00000068820	136.555	-0.686057	0.190921	-3.59341	0.000326377	0.00464735	2.3328	h2afva
ENSDARG00000054890	5.94608	2.11682	0.589363	3.59171	0.000328516	0.00467248	2.33045	rgra
ENSDARG00000029204	18.4134	-1.42862	0.397855	-3.59082	0.00032964	0.00468314	2.32946	-
ENSDARG00000059805	4.64844	2.21993	0.618876	3.58704	0.000334449	0.00474607	2.32367	slc25a38a
ENSDARG00000098883	15.9138	-1.45304	0.405235	-3.58568	0.000336207	0.00476561	2.32188	stac3
ENSDARG00000077777	2550.93	0.371281	0.103648	3.58214	0.000340796	0.00482517	2.31649	tmsb4x
ENSDARG00000013351	1131.55	0.477674	0.133419	3.58026	0.00034325	0.00485021	2.31424	cirbpb
ENSDARG00000030490	48.9621	-0.910424	0.254295	-3.58019	0.00034334	0.00485021	2.31424	sptb
ENSDARG00000061635	19.2187	-1.48176	0.413934	-3.5797	0.000343986	0.00485386	2.31391	myo5aa
ENSDARG00000078109	28.9631	-1.15465	0.322743	-3.57762	0.000346732	0.00488709	2.31095	usp12a
ENSDARG00000021107	59.0454	0.952451	0.266645	3.57199	0.000354282	0.0049829	2.30252	sf3a2
ENSDARG00000041779	90.4938	-0.849202	0.237741	-3.57195	0.000354327	0.0049829	2.30252	-
ENSDARG00000008030	71.3119	0.788013	0.220829	3.56843	0.000359132	0.0050448	2.29716	myl9b
ENSDARG00000092467	470.907	-0.519176	0.145569	-3.56653	0.000361742	0.00507576	2.2945	-
ENSDARG00000011870	27.0917	1.18629	0.332727	3.56534	0.000363378	0.00508729	2.29351	sp8a
ENSDARG00000086996	8.68587	1.97746	0.554603	3.56554	0.000363112	0.00508729	2.29351	si:ch73-234b20.5
ENSDARG00000089271	9.41664	-1.77426	0.497788	-3.5643	0.000364834	0.00510197	2.29226	si:dkey-114c15.7
ENSDARG00000042708	164.351	-0.739086	0.207478	-3.56224	0.00036771	0.00513643	2.28934	tuba8l
ENSDARG00000077169	3.83347	2.25753	0.633883	3.56143	0.000368834	0.00514638	2.2885	si:ch211-153b23.4
ENSDARG00000018698	75.4523	-0.786883	0.221038	-3.55994	0.00037094	0.00516424	2.28699	carm1
ENSDARG00000019274	13.887	1.699	0.477244	3.56003	0.000370814	0.00516424	2.28699	rasd1
ENSDARG00000074030	221.937	-0.586767	0.164845	-3.55952	0.000371537	0.00516681	2.28678	myt1a
ENSDARG00000017744	128.608	-0.642165	0.180423	-3.55923	0.000371951	0.00516681	2.28678	smc2
ENSDARG00000028625	22.3938	-1.35746	0.381428	-3.55888	0.000372434	0.00516778	2.2867	jph2
ENSDARG00000100821	22.5524	-1.23158	0.346183	-3.5576	0.000374261	0.00518738	2.28505	scrt1a
ENSDARG00000027141	77.2915	-0.880864	0.247726	-3.5558	0.000376836	0.00521728	2.28256	ube2l3b
ENSDARG00000003035	101.511	0.864202	0.243079	3.55524	0.00037764	0.00522262	2.28211	hspa9
ENSDARG00000010516	2057.43	0.336258	0.0946049	3.55434	0.000378935	0.00523475	2.2811	rpl21
ENSDARG00000037000	38.57	1.1334	0.318914	3.55395	0.000379496	0.00523527	2.28106	fkbp11
ENSDARG00000074396	8.76433	-1.84204	0.518341	-3.55373	0.00037981	0.00523527	2.28106	fscn2b
ENSDARG00000056318	33.877	1.11388	0.313575	3.5522	0.000382027	0.00526002	2.27901	kansl2
ENSDARG00000074749	26.9458	1.18587	0.334364	3.54665	0.000390161	0.0053661	2.27034	-
ENSDARG00000030514	36.2692	-1.15587	0.32607	-3.54486	0.000392824	0.0053968	2.26786	acsl1a
ENSDARG00000029524	85.2234	-0.779434	0.219902	-3.54446	0.000393421	0.00539907	2.26768	impdh1b
ENSDARG00000013946	13.9797	1.55895	0.440216	3.54132	0.000398126	0.00545764	2.263	ivns1abpb
ENSDARG00000099555	13.7904	1.53042	0.432417	3.53921	0.000401319	0.00549539	2.26	foxo1a
ENSDARG00000043046	29.1921	1.23143	0.348519	3.53331	0.000410392	0.00561348	2.25077	fbxl5
ENSDARG00000056378	14.901	1.58451	0.44865	3.53174	0.000412835	0.00563457	2.24914	ifi30
ENSDARG00000056531	207.407	-0.524951	0.148638	-3.53174	0.00041283	0.00563457	2.24914	nutf2
ENSDARG00000014348	22.4285	-1.20495	0.341687	-3.52648	0.000421124	0.00574143	2.24098	stk17b
ENSDARG00000043457	280.967	-0.598872	0.169907	-3.52469	0.000423976	0.00576783	2.23899	gapdh
ENSDARG00000086826	31.1894	1.19614	0.339362	3.52469	0.000423983	0.00576783	2.23899	sult6b1
ENSDARG00000020645	23.1257	1.52003	0.431372	3.52371	0.000425546	0.0057828	2.23786	slc7a3a
ENSDARG00000045914	155.062	-0.637023	0.180937	-3.5207	0.000430409	0.00584254	2.2334	si:ch211-51e12.7
ENSDARG00000054362	44.4956	-0.891459	0.253266	-3.51986	0.000431776	0.00585474	2.23249	ccdc47
ENSDARG00000031776	366.707	0.462539	0.131451	3.51872	0.000433636	0.00587358	2.2311	zgc:92066
ENSDARG00000098850	27.2499	-1.20232	0.341981	-3.51574	0.000438527	0.00593341	2.2267	-
ENSDARG00000067997	688.21	-1.46541	0.41749	-3.51005	0.000448019	0.00605528	2.21787	ns:zf-e68
ENSDARG00000035136	99.1009	0.71118	0.202714	3.50829	0.00045099	0.00608885	2.21546	sepw1
ENSDARG00000070801	28.9108	-1.17702	0.335573	-3.5075	0.000452332	0.00609381	2.21511	opa1
ENSDARG00000097959	25.7175	-1.18624	0.338188	-3.50763	0.000452119	0.00609381	2.21511	si:dkey-248g15.3
ENSDARG00000030789	183.261	0.538428	0.153525	3.5071	0.000453012	0.0060964	2.21493	ddx18
ENSDARG00000099429	61.0906	-0.818095	0.233325	-3.50625	0.000454463	0.00610935	2.21401	mrps15
ENSDARG00000043474	9.94446	-1.80278	0.514661	-3.50285	0.000460308	0.00618128	2.20892	atp2b3a
ENSDARG00000002659	76.6628	-0.877138	0.250683	-3.49899	0.000467032	0.00625813	2.20356	mapre1b
ENSDARG00000040838	21.0176	-1.40809	0.40242	-3.49905	0.000466915	0.00625813	2.20356	dcun1d2a
ENSDARG00000102806	15.1801	-1.5945	0.455961	-3.49701	0.000470509	0.00629797	2.2008	si:dkey-23a13.16; zgc:112234
ENSDARG00000058452	42.3114	-0.971043	0.277788	-3.49563	0.000472946	0.00632382	2.19902	abhd17c
ENSDARG00000099954	28.8969	1.21495	0.347599	3.49525	0.000473616	0.00632601	2.19887	plekhm1
ENSDARG00000034956	56.0752	0.901235	0.257904	3.49446	0.000475016	0.00633495	2.19826	myclb
ENSDARG00000059360	224.18	-0.639182	0.182921	-3.4943	0.000475298	0.00633495	2.19826	srsf3b
ENSDARG00000034160	35.7823	-1.05623	0.302497	-3.4917	0.00047996	0.00638347	2.19494	slc4a1ap
ENSDARG00000042684	28.3577	1.29665	0.371344	3.49177	0.000479826	0.00638347	2.19494	serpinc1
ENSDARG00000059866	46.6538	-0.90208	0.25847	-3.49007	0.000482887	0.00641558	2.19276	cactin
ENSDARG00000025855	15.971	-1.56032	0.447167	-3.48934	0.000484211	0.00642633	2.19204	camk2n1a
ENSDARG00000021633	45.6574	-0.972058	0.278672	-3.48818	0.000486328	0.00644758	2.1906	sh3bgr
ENSDARG00000003695	320.904	-0.511463	0.146674	-3.48709	0.000488315	0.00645846	2.18987	vdac3
ENSDARG00000038428	71.4207	0.775719	0.222453	3.48712	0.00048826	0.00645846	2.18987	sulf1
ENSDARG00000053467	38.0145	1.29349	0.370961	3.48688	0.000488698	0.00645846	2.18987	gtpbp1
ENSDARG00000007184	661.556	0.497176	0.142785	3.482	0.000497687	0.00654268	2.18424	zbtb16a
ENSDARG00000013207	74.444	0.825387	0.237028	3.48224	0.000497237	0.00654268	2.18424	zeb1b
ENSDARG00000069503	35.3692	1.0536	0.302553	3.48237	0.000496988	0.00654268	2.18424	cldnh
ENSDARG00000070230	37.7998	1.30537	0.374829	3.48257	0.000496622	0.00654268	2.18424	aldh1l2
ENSDARG00000102946	24.1121	1.50825	0.433124	3.48226	0.000497201	0.00654268	2.18424	-
ENSDARG00000058379	10.5806	-1.65846	0.476421	-3.48108	0.000499405	0.00655836	2.1832	otpb
ENSDARG00000038000	5.01834	2.10566	0.60504	3.48019	0.000501054	0.00657312	2.18223	crls1
ENSDARG00000017014	153.52	-0.597928	0.171846	-3.47943	0.000502482	0.00658494	2.18145	ywhae2
ENSDARG00000000442	20.7419	1.31874	0.379083	3.47877	0.000503712	0.00659414	2.18084	slc39a13
ENSDARG00000035924	34.3969	-1.27833	0.368044	-3.4733	0.000514099	0.00672309	2.17243	dync1li2
ENSDARG00000051735	70.5876	-0.812961	0.234288	-3.46991	0.000520625	0.00680132	2.16741	si:ch211-113a14.18
ENSDARG00000087390	3.72863	2.23955	0.646034	3.46661	0.000527066	0.00687827	2.16252	hbbe1.3
ENSDARG00000010565	4.74065	-2.15915	0.622989	-3.46579	0.000528667	0.00689197	2.16166	aqp4
ENSDARG00000012656	76.9646	0.801439	0.231295	3.46501	0.000530205	0.00690482	2.16085	atf6
ENSDARG00000063229	46.4895	1.0796	0.311849	3.46194	0.000536304	0.00697698	2.15633	xpo1b
ENSDARG00000038609	19.3005	1.54371	0.446542	3.45703	0.000546173	0.00708386	2.14973	mpz
ENSDARG00000052178	92.1384	0.706316	0.204315	3.457	0.00054622	0.00708386	2.14973	eif2s1b
ENSDARG00000089806	47.061	1.06938	0.309334	3.45704	0.000546141	0.00708386	2.14973	si:dkey-239j18.3
ENSDARG00000070404	8.58835	1.77722	0.514156	3.45658	0.00054708	0.00708766	2.1495	fam212ab
ENSDARG00000103791	297.09	0.65738	0.190204	3.45619	0.000547866	0.0070905	2.14932	nme2b.1
ENSDARG00000100854	40.3063	-0.93041	0.269407	-3.45355	0.000553259	0.00715289	2.14552	ago4
ENSDARG00000052437	5.67007	2.05711	0.595747	3.45299	0.000554402	0.00716026	2.14507	mia
ENSDARG00000035458	2.54223	-2.2285	0.645868	-3.45039	0.000559767	0.00721523	2.14175	atp2a1l
ENSDARG00000042725	20.9368	1.44265	0.418115	3.45037	0.000559812	0.00721523	2.14175	cebpb
ENSDARG00000031587	7.32037	1.91924	0.556393	3.44943	0.00056177	0.007233	2.14068	flvcr1
ENSDARG00000018303	36.6997	1.02116	0.296118	3.4485	0.000563707	0.00723559	2.14053	etv4
ENSDARG00000034823	30.1315	1.13111	0.327976	3.44877	0.000563141	0.00723559	2.14053	copg2
ENSDARG00000057583	301.04	-0.528033	0.1531	-3.44893	0.000562812	0.00723559	2.14053	prrc2c
ENSDARG00000055276	5.06204	2.10005	0.609101	3.44779	0.000565196	0.00724727	2.13983	rel
ENSDARG00000017821	11.4222	1.72766	0.501509	3.44493	0.000571203	0.00731678	2.13568	gata5
ENSDARG00000059049	25.3942	1.25336	0.364136	3.442	0.000577427	0.00738893	2.13142	zgc:174904
ENSDARG00000014488	12.1593	-1.53425	0.446036	-3.43974	0.000582277	0.00744338	2.12823	ca2
ENSDARG00000006584	27.3986	-1.33788	0.389157	-3.4379	0.000586251	0.00748653	2.12572	phf8
ENSDARG00000058032	8.4759	1.84646	0.537403	3.4359	0.000590591	0.00753425	2.12296	si:dkey-6n6.2
ENSDARG00000027529	13.0969	1.63375	0.476031	3.43201	0.000599122	0.00762752	2.11762	hmox1a
ENSDARG00000099115	26.8341	1.27298	0.37091	3.43204	0.000599063	0.00762752	2.11762	-
ENSDARG00000055099	13.8191	-1.48359	0.432324	-3.43167	0.000599866	0.00762922	2.11752	fam184b
ENSDARG00000098105	19.0764	1.50779	0.439464	3.43098	0.000601398	0.00764093	2.11685	tmem106c
ENSDARG00000058992	32.2735	1.22128	0.356462	3.4261	0.000612311	0.00777169	2.10948	cers2b
ENSDARG00000006758	12.561	1.53411	0.447961	3.42465	0.000615597	0.00780547	2.1076	fam234b
ENSDARG00000105424	4.45931	2.1357	0.623795	3.42373	0.000617691	0.00782408	2.10657	si:rp71-46j2.7
ENSDARG00000019998	36.9059	1.05265	0.307745	3.42052	0.000625007	0.00790875	2.10189	slc30a7
ENSDARG00000087203	4.20507	-2.13514	0.624415	-3.41943	0.000627536	0.0079247	2.10102	-
ENSDARG00000105394	5.11243	2.0919	0.611722	3.41969	0.000626914	0.0079247	2.10102	-
ENSDARG00000098488	8.66507	-1.70053	0.497811	-3.41602	0.000635428	0.00801626	2.09603	-
ENSDARG00000035066	112.444	-0.630814	0.184792	-3.41364	0.000641007	0.0080785	2.09267	ubtf
ENSDARG00000058226	19.6975	1.32528	0.388332	3.41276	0.000643084	0.00808131	2.09252	ak3
ENSDARG00000058819	19.2262	1.61197	0.472341	3.41272	0.000643169	0.00808131	2.09252	nog1
ENSDARG00000099761	11.7924	1.63792	0.479941	3.41276	0.000643082	0.00808131	2.09252	vox
ENSDARG00000101471	11.3668	-1.71887	0.503888	-3.41122	0.000646739	0.00811801	2.09055	fgd4a
ENSDARG00000079745	89.9712	0.772559	0.226605	3.40928	0.000651355	0.00816774	2.0879	si:ch211-166a6.5
ENSDARG00000101406	1056.78	-0.459877	0.134983	-3.40691	0.000657017	0.00823048	2.08457	rplp2
ENSDARG00000078419	25.0985	1.21838	0.357945	3.40382	0.000664517	0.00831611	2.08008	LOC101884302
ENSDARG00000089042	15.9124	1.44529	0.424936	3.40118	0.00067095	0.00838822	2.07633	foxb1a
ENSDARG00000026183	71.3341	0.814337	0.239631	3.3983	0.000678059	0.00845173	2.07305	polr2eb
ENSDARG00000026236	12.7376	1.64327	0.48352	3.39856	0.000677424	0.00845173	2.07305	zgc:56585
ENSDARG00000038716	4.04202	-2.12761	0.625995	-3.39876	0.000676929	0.00845173	2.07305	casq1a
ENSDARG00000077377	7.24977	-1.92882	0.568148	-3.39493	0.000686455	0.00854787	2.06814	si:dkey-85n7.6
ENSDARG00000070818	40.6871	-0.946753	0.279075	-3.39247	0.000692663	0.0086166	2.06466	pax7b
ENSDARG00000056650	2.37973	-2.18937	0.645716	-3.39061	0.00069736	0.0086664	2.06216	zgc:113276
ENSDARG00000035692	1350.89	0.336995	0.0994402	3.38892	0.00070169	0.00871155	2.0599	rps3a
ENSDARG00000026875	20.0403	-1.26042	0.372187	-3.38652	0.000707855	0.00877937	2.05654	fam57ba
ENSDARG00000016676	145.765	-0.551655	0.162929	-3.38587	0.000709531	0.00878273	2.05637	gnao1a
ENSDARG00000023190	147.045	-0.579797	0.171237	-3.38592	0.000709393	0.00878273	2.05637	kpna4
ENSDARG00000057249	56.5029	-0.880948	0.260298	-3.38439	0.000713379	0.00882162	2.05445	zmynd11
ENSDARG00000054804	105.657	-0.641846	0.189669	-3.38403	0.000714313	0.00882444	2.05431	anp32e
ENSDARG00000061039	30.9058	-1.00915	0.298239	-3.3837	0.000715162	0.00882621	2.05423	atp10a
ENSDARG00000056525	77.8635	0.872577	0.258124	3.38045	0.000723672	0.00891364	2.04994	bcar1
ENSDARG00000074244	26.7965	-1.10683	0.327413	-3.38053	0.000723456	0.00891364	2.04994	arhgef10lb
ENSDARG00000011373	10.2852	1.75235	0.518469	3.37986	0.000725238	0.00892414	2.04943	mknk2a
ENSDARG00000005320	3.59277	2.15358	0.638281	3.37403	0.000740756	0.00909141	2.04137	nipsnap1
ENSDARG00000012002	7.54154	1.83798	0.544757	3.37394	0.000741013	0.00909141	2.04137	slc38a7
ENSDARG00000024141	158.76	-0.756233	0.224108	-3.37441	0.000739728	0.00909141	2.04137	cav3
ENSDARG00000054911	45.6338	-0.958453	0.284248	-3.37189	0.000746537	0.0091502	2.03857	tmsb
ENSDARG00000089505	42.5647	-0.972962	0.288909	-3.36772	0.000757938	0.00928085	2.03241	bod1l1
ENSDARG00000076411	10.3623	-1.63853	0.486732	-3.36639	0.000761593	0.00931647	2.03075	cavin1a
ENSDARG00000020448	26.3081	1.20471	0.357937	3.3657	0.000763488	0.00933053	2.03009	adi1
ENSDARG00000054929	30.7874	-1.06721	0.317145	-3.36506	0.000765274	0.00934197	2.02956	zgc:110540
ENSDARG00000083699	14.4765	-1.56405	0.464823	-3.36483	0.000765919	0.00934197	2.02956	-
ENSDARG00000041381	50.217	-0.973448	0.289497	-3.36254	0.000772281	0.00941039	2.02639	arntl2
ENSDARG00000088619	40.6294	1.0316	0.306828	3.36214	0.000773399	0.00941484	2.02619	rexo4
ENSDARG00000093569	13.9396	1.52622	0.454341	3.35919	0.000781702	0.00950665	2.02197	bckdhbl
ENSDARG00000015206	114.49	-0.632276	0.188397	-3.35608	0.000790553	0.00960495	2.0175	hnrnpua
ENSDARG00000039677	36.9041	0.955864	0.284841	3.35578	0.000791402	0.00960593	2.01746	dsc2l
ENSDARG00000041182	1538.58	0.322727	0.0961784	3.3555	0.000792215	0.00960647	2.01744	rpl4
ENSDARG00000074311	19.0112	-1.40513	0.418892	-3.35441	0.000795349	0.00963513	2.01614	mast2
ENSDARG00000041481	42.5956	-0.966183	0.288108	-3.35355	0.00079783	0.00964724	2.0156	smg5
ENSDARG00000053990	401.549	-0.470774	0.140393	-3.35326	0.000798664	0.00964724	2.0156	hmgb2b
ENSDARG00000099722	12.6698	-1.53552	0.457886	-3.3535	0.000797959	0.00964724	2.0156	zgc:153993
ENSDARG00000102787	38.6751	-0.971665	0.289792	-3.35298	0.000799478	0.00964775	2.01557	fam193a
ENSDARG00000057859	22.573	1.21157	0.36147	3.35178	0.00080293	0.00967075	2.01454	hoxd10a
ENSDARG00000077516	17.9936	-1.34951	0.402608	-3.35191	0.000802568	0.00967075	2.01454	recql4
ENSDARG00000019924	53.4817	-0.878042	0.262013	-3.35114	0.00080479	0.00967451	2.01437	cmpk
ENSDARG00000069043	5.23353	2.06488	0.616129	3.35138	0.000804109	0.00967451	2.01437	hsd11b1lb
ENSDARG00000011020	63.5193	-0.817251	0.244044	-3.34879	0.000811668	0.00974781	2.01109	hnrnpa1a
ENSDARG00000008333	61.5429	0.980906	0.293062	3.34709	0.000816653	0.00979826	2.00885	znfl2a
ENSDARG00000039960	22.4046	1.24504	0.372129	3.34573	0.000820661	0.00983692	2.00714	-
ENSDARG00000057013	26.9699	-1.1838	0.353918	-3.34486	0.000823255	0.00985856	2.00619	cadm3
ENSDARG00000098855	10.2046	1.67785	0.502095	3.3417	0.000832672	0.00996179	2.00166	osxm
ENSDARG00000040002	16.2932	1.4502	0.434176	3.34012	0.000837409	0.0100089	1.99961	pnpla7b
ENSDARG00000006526	49.9683	1.74013	0.521205	3.33866	0.000841826	0.0100521	1.99774	fn1b
ENSDARG00000006514	88.2987	0.787097	0.235773	3.33837	0.000842706	0.010053	1.99771	her6
ENSDARG00000029353	10.7784	1.71904	0.51501	3.33788	0.000844215	0.0100614	1.99734	serpine2
ENSDARG00000054290	592.748	-0.463037	0.138806	-3.33585	0.000850392	0.0101116	1.99518	acin1a
ENSDARG00000093232	13.3696	-1.55592	0.466444	-3.3357	0.000850854	0.0101116	1.99518	-
ENSDARG00000099371	255.598	0.540886	0.162146	3.3358	0.000850557	0.0101116	1.99518	cygb1
ENSDARG00000033852	24.6783	-1.16857	0.350593	-3.33312	0.000858767	0.0101863	1.99199	-
ENSDARG00000078989	54.3629	-0.833926	0.250179	-3.33331	0.000858192	0.0101863	1.99199	alpk3a
ENSDARG00000069382	3.97304	2.13106	0.641203	3.32352	0.000888878	0.0105334	1.97743	mxtx1
ENSDARG00000011564	155.449	-0.581296	0.17497	-3.32226	0.000892916	0.0105524	1.97665	sfpq
ENSDARG00000059654	223.035	0.505241	0.152079	3.32223	0.00089301	0.0105524	1.97665	eif3ba
ENSDARG00000079780	156.997	-0.557126	0.167688	-3.32239	0.000892491	0.0105524	1.97665	-
ENSDARG00000054007	18.9525	-1.37739	0.414822	-3.32045	0.000898727	0.0106099	1.97429	ppp1r2
ENSDARG00000052746	35.524	1.03514	0.311776	3.32015	0.0008997	0.0106114	1.97423	grinab
ENSDARG00000077785	16.4744	1.43081	0.431044	3.3194	0.000902118	0.0106299	1.97347	atf5b
ENSDARG00000058533	44.6966	-0.932352	0.280948	-3.31859	0.000904733	0.0106506	1.97262	pole
ENSDARG00000071005	18.5019	1.26732	0.381983	3.31774	0.000907505	0.0106732	1.9717	ppp1r3ca
ENSDARG00000088130	74.0369	-0.739366	0.222934	-3.31653	0.000911442	0.0107094	1.97023	si:dkey-30c15.10
ENSDARG00000044212	14.1065	-1.43635	0.433382	-3.31429	0.000918765	0.0107854	1.96717	-
ENSDARG00000059775	17.0869	-1.35441	0.408968	-3.31178	0.000927046	0.0108724	1.96368	slc32a1
ENSDARG00000006128	52.856	-0.868374	0.262345	-3.31005	0.000932802	0.0109255	1.96156	cep170aa
ENSDARG00000024209	24.8381	1.20662	0.36455	3.30989	0.000933324	0.0109255	1.96156	wasf2
ENSDARG00000095817	14.2877	1.4964	0.452371	3.30791	0.000939964	0.0109929	1.95889	znhit6
ENSDARG00000099865	352.194	-0.487595	0.147435	-3.3072	0.000942346	0.0110105	1.95819	hnrnpabb
ENSDARG00000060637	5.53153	-1.95109	0.590251	-3.30554	0.00094795	0.0110656	1.95602	clstn2
ENSDARG00000006395	191.208	-0.575487	0.174169	-3.3042	0.000952492	0.0111083	1.95435	rbm25b
ENSDARG00000098646	53.7931	1.64371	0.497902	3.30128	0.000962449	0.0112139	1.95024	mthfd2
ENSDARG00000063682	20.5783	-1.24381	0.376853	-3.30053	0.000965034	0.0112336	1.94948	-
ENSDARG00000005112	26.3306	1.17528	0.356863	3.29338	0.000989908	0.0115124	1.93883	cdh17
ENSDARG00000041232	1591.21	0.403901	0.122656	3.29297	0.000991362	0.0115186	1.9386	rps29
ENSDARG00000091293	20.0351	1.2938	0.393061	3.2916	0.000996208	0.0115642	1.93689	dmxl2
ENSDARG00000025859	27.9598	-1.00496	0.305423	-3.29038	0.00100053	0.0116036	1.93541	lmf2b
ENSDARG00000075482	20.2469	-1.22621	0.372953	-3.28783	0.00100964	0.0116983	1.93188	zgc:173587; zgc:114046
ENSDARG00000054155	448.586	-0.600333	0.182638	-3.28701	0.00101259	0.0117216	1.93101	pcna
ENSDARG00000000229	38.9171	-1.00463	0.305714	-3.28617	0.00101561	0.0117457	1.93012	usp49
ENSDARG00000011125	232.212	0.56583	0.172424	3.28162	0.00103213	0.011917	1.92383	snrpb
ENSDARG00000061841	10.5214	1.6395	0.49961	3.28157	0.00103232	0.011917	1.92383	tiparp
ENSDARG00000016513	23.1057	-1.15269	0.351361	-3.28063	0.00103576	0.0119346	1.92319	setd3
ENSDARG00000103162	10.1356	1.74056	0.530523	3.28084	0.00103498	0.0119346	1.92319	-
ENSDARG00000094451	21.6856	1.25486	0.382956	3.27677	0.00105002	0.0120878	1.91765	cfp
ENSDARG00000018820	138.496	0.639573	0.195318	3.27452	0.00105842	0.0121733	1.91459	flncb
ENSDARG00000034368	20.9137	1.35554	0.41428	3.27205	0.00106772	0.012269	1.91119	hexb
ENSDARG00000056480	27.6775	1.26421	0.386543	3.27055	0.00107337	0.0123113	1.9097	cpvl
ENSDARG00000099197	2895.39	-0.985021	0.301163	-3.27072	0.00107274	0.0123113	1.9097	actc1b
ENSDARG00000021938	9.10591	1.71806	0.525558	3.26901	0.00107924	0.0123673	1.90773	smad9
ENSDARG00000023111	20.9223	1.19993	0.367242	3.26742	0.00108534	0.0124257	1.90568	plg
ENSDARG00000090352	7.92432	1.82775	0.559611	3.26611	0.00109036	0.0124718	1.90407	-
ENSDARG00000077264	93.4753	0.676978	0.207329	3.26523	0.00109373	0.012499	1.90313	wdr43
ENSDARG00000103648	25.8388	-1.12715	0.345346	-3.26383	0.00109917	0.0125497	1.90137	znf536
ENSDARG00000013931	194.811	0.517412	0.158593	3.26251	0.00110429	0.0125965	1.89975	eif3m
ENSDARG00000041505	7.16264	1.76569	0.541427	3.26119	0.00110948	0.0126442	1.89811	itm2bb
ENSDARG00000091715	10.5246	1.6268	0.498902	3.26075	0.00111118	0.0126521	1.89784	-
ENSDARG00000043973	53.639	0.922592	0.282976	3.26032	0.00111287	0.0126598	1.89757	znf292b
ENSDARG00000038151	12.3147	1.55998	0.478606	3.25942	0.00111642	0.0126771	1.89698	zgc:92360
ENSDARG00000097150	7.03084	1.84412	0.565779	3.25943	0.00111637	0.0126771	1.89698	-
ENSDARG00000078313	63.8	-0.79309	0.243447	-3.25775	0.00112298	0.01274	1.89483	LOC100332329
ENSDARG00000093549	150.284	0.795835	0.24432	3.25734	0.0011246	0.0127468	1.8946	sepp1a
ENSDARG00000035133	168.9	0.54628	0.167819	3.25518	0.00113322	0.0128303	1.89176	pho
ENSDARG00000039208	180.008	-0.540893	0.166174	-3.25498	0.00113401	0.0128303	1.89176	nasp
ENSDARG00000001879	55.1522	0.827624	0.254415	3.25304	0.00114177	0.0129063	1.8892	nav2b
ENSDARG00000010791	157.122	-0.592336	0.182132	-3.25224	0.00114501	0.0129196	1.88875	dla
ENSDARG00000021987	562.865	-0.380964	0.117133	-3.2524	0.00114433	0.0129196	1.88875	si:ch211-165e15.1
ENSDARG00000040237	245.528	0.490863	0.150966	3.25147	0.00114808	0.0129309	1.88837	mef2d
ENSDARG00000088972	2.62455	2.10066	0.646045	3.25158	0.00114766	0.0129309	1.88837	si:dkey-238d18.4
ENSDARG00000021195	22.822	-1.18506	0.364652	-3.24983	0.00115474	0.0129941	1.88625	st8sia6
ENSDARG00000024492	217.416	0.573315	0.176481	3.2486	0.00115976	0.013039	1.88476	col9a2
ENSDARG00000012422	97.7016	-0.938927	0.289523	-3.24302	0.00118271	0.0132731	1.87703	col11a2
ENSDARG00000104230	70.0201	0.726143	0.223903	3.24312	0.0011823	0.0132731	1.87703	sec23a
ENSDARG00000013478	70.0588	0.731617	0.225626	3.24261	0.0011844	0.0132801	1.8768	rrp15
ENSDARG00000010244	508.07	0.465567	0.143678	3.24036	0.0011938	0.0133736	1.87375	rpl22l1
ENSDARG00000100366	46.6745	0.82452	0.254503	3.23972	0.00119646	0.0133913	1.87318	-
ENSDARG00000062788	3.38647	2.09096	0.645525	3.23916	0.00119881	0.0134057	1.87271	irg1l
ENSDARG00000100887	3.61613	2.07527	0.641002	3.23754	0.00120566	0.0134702	1.87062	si:dkey-11f4.20
ENSDARG00000087093	70.2545	0.700552	0.216409	3.23717	0.00120721	0.0134755	1.87046	si:ch211-157c3.4
ENSDARG00000074465	12.1212	-1.45407	0.449232	-3.23679	0.00120881	0.0134813	1.87027	vps13c
ENSDARG00000013730	56.5518	0.893719	0.276196	3.23581	0.00121299	0.0135158	1.86916	slc4a4a
ENSDARG00000105287	16.1213	1.5121	0.467348	3.2355	0.00121428	0.0135182	1.86908	mpp1
ENSDARG00000053963	11.0842	1.5611	0.482592	3.23483	0.00121717	0.0135383	1.86844	npm2b
ENSDARG00000003684	19.6711	-1.20154	0.371705	-3.2325	0.00122712	0.0136369	1.86528	obsl1a
ENSDARG00000074381	23.9024	1.19074	0.368425	3.23197	0.00122942	0.0136503	1.86486	-
ENSDARG00000037068	2.38706	-2.08186	0.644428	-3.23055	0.00123552	0.0137058	1.86309	si:dkey-166n8.9
ENSDARG00000063416	48.6385	1.13438	0.351305	3.22904	0.00124208	0.0137663	1.86118	-
ENSDARG00000086789	18.8041	1.2361	0.383342	3.22455	0.00126172	0.0139716	1.85475	bahd1
ENSDARG00000058603	6.26928	-1.87013	0.580095	-3.22383	0.0012649	0.0139945	1.85404	jph1a
ENSDARG00000019810	37.5835	-0.936392	0.290559	-3.22273	0.00126976	0.0140117	1.85351	nfe2l3
ENSDARG00000054103	4.85306	1.99003	0.617502	3.22272	0.00126982	0.0140117	1.85351	ripply1
ENSDARG00000071652	43.6691	0.941717	0.29221	3.22274	0.00126969	0.0140117	1.85351	rrp8
ENSDARG00000029474	14.3791	1.43118	0.444265	3.22146	0.00127539	0.0140607	1.85199	camk1b
ENSDARG00000033854	2.54146	-2.07466	0.644087	-3.22109	0.00127704	0.0140665	1.85181	abrab
ENSDARG00000033760	5.97759	-1.86131	0.577908	-3.22078	0.00127842	0.0140694	1.85172	pmelb
ENSDARG00000014428	57.1428	-0.777389	0.241409	-3.22022	0.00128092	0.0140845	1.85126	ppp2r5d
ENSDARG00000061757	31.1027	0.983332	0.305431	3.21949	0.0012842	0.0141081	1.85053	rabgap1l
ENSDARG00000007277	7.90205	1.74133	0.540919	3.2192	0.00128551	0.0141101	1.85047	myf5
ENSDARG00000038754	28.6464	1.0555	0.328113	3.21688	0.00129594	0.0141997	1.84772	plk3
ENSDARG00000099959	712.378	0.468357	0.145591	3.21693	0.0012957	0.0141997	1.84772	smyhc1
ENSDARG00000025903	6.45201	1.93246	0.601124	3.21475	0.00130559	0.0142804	1.84526	lgals9l1
ENSDARG00000101813	837.322	-0.445138	0.138465	-3.2148	0.00130536	0.0142804	1.84526	nap1l1
ENSDARG00000086327	28.9111	-1.04322	0.324685	-3.21303	0.00131341	0.0143534	1.84305	srrm4
ENSDARG00000104222	56.5962	0.799443	0.248884	3.21211	0.00131765	0.0143871	1.84203	-
ENSDARG00000003109	22.632	1.25374	0.390531	3.21035	0.00132575	0.0144629	1.83974	rcan1a
ENSDARG00000038737	53.5563	-0.822325	0.256297	-3.20848	0.00133436	0.0145361	1.83755	phf20b
ENSDARG00000052769	14.4715	1.46075	0.455289	3.2084	0.00133478	0.0145361	1.83755	glrbb
ENSDARG00000027744	11.264	1.55485	0.484711	3.20779	0.00133761	0.0145498	1.83714	gadd45ba
ENSDARG00000086591	43.6799	-0.843104	0.262844	-3.20762	0.00133837	0.0145498	1.83714	LOC108179079; si:ch211-113a14.11
ENSDARG00000055678	974.04	0.92862	0.289601	3.20655	0.00134337	0.0145915	1.8359	akap12b
ENSDARG00000017891	100.015	0.708216	0.220906	3.20597	0.00134609	0.0146084	1.8354	tcp1
ENSDARG00000090297	17.2514	1.42447	0.444354	3.20571	0.00134728	0.0146086	1.83539	ldlrad2
ENSDARG00000020009	8.60072	1.65169	0.515456	3.20432	0.0013538	0.0146538	1.83405	bmp2k
ENSDARG00000033614	56.5695	0.905302	0.282511	3.20449	0.00135304	0.0146538	1.83405	rasgef1ba
ENSDARG00000029072	128.068	0.616767	0.192581	3.20264	0.00136174	0.0147177	1.83216	klf6a
ENSDARG00000037307	14.6003	1.5094	0.471308	3.20257	0.00136205	0.0147177	1.83216	gnpda1
ENSDARG00000068261	6.85671	1.79561	0.560842	3.20163	0.00136652	0.0147532	1.83111	pros1
ENSDARG00000014329	446.413	0.401233	0.125404	3.19951	0.00137663	0.0148009	1.82971	npm1a
ENSDARG00000023445	19.1818	-1.24286	0.38846	-3.19946	0.00137686	0.0148009	1.82971	atp2b3b
ENSDARG00000070348	19.2642	1.30809	0.408804	3.19981	0.00137519	0.0148009	1.82971	hoxc10a
ENSDARG00000074759	60.4093	-0.776715	0.242728	-3.19994	0.00137455	0.0148009	1.82971	ccar1
ENSDARG00000078430	38.5062	0.937932	0.293134	3.19967	0.00137584	0.0148009	1.82971	tiam1a
ENSDARG00000060927	6.50013	1.85531	0.579935	3.19917	0.00137824	0.014803	1.82965	-
ENSDARG00000005645	107.238	0.674407	0.210999	3.19625	0.00139227	0.0149409	1.82562	robo3
ENSDARG00000051778	9.9513	-1.64478	0.514731	-3.19541	0.00139633	0.0149717	1.82473	zgc:194989
ENSDARG00000100636	33.2121	-1.01188	0.316695	-3.19512	0.00139771	0.0149736	1.82467	rbm12
ENSDARG00000070538	47.2089	0.845342	0.26466	3.19407	0.00140283	0.0150156	1.82346	hey1
ENSDARG00000029457	3.51857	-2.02758	0.634949	-3.19329	0.00140661	0.0150431	1.82266	cacna1sa
ENSDARG00000033466	75.5181	0.779713	0.244204	3.19287	0.00140865	0.0150521	1.8224	tagln2
ENSDARG00000056836	70.9331	0.730363	0.228797	3.19219	0.00141201	0.0150751	1.82174	si:ch211-125o16.4
ENSDARG00000035963	2.60096	2.06183	0.645983	3.19177	0.00141403	0.0150838	1.82149	ccdc96
ENSDARG00000022424	7.03839	1.74269	0.546074	3.19131	0.00141628	0.0150949	1.82117	slc26a5
ENSDARG00000095254	15.1288	1.3966	0.43767	3.19098	0.00141789	0.0150992	1.82104	si:dkey-239j18.2
ENSDARG00000035095	8.26411	1.68173	0.527301	3.18931	0.00142614	0.0151741	1.8189	tdgf1
ENSDARG00000033012	83.9092	-0.725911	0.227666	-3.18849	0.00143019	0.0152042	1.81804	pcnt
ENSDARG00000089871	37.5176	0.986947	0.310138	3.18229	0.00146117	0.0155204	1.8091	jcada
ENSDARG00000036855	80.2121	-0.658463	0.20739	-3.175	0.00149839	0.0159022	1.79854	plagx
ENSDARG00000105255	13.2542	-1.44248	0.454887	-3.17107	0.00151877	0.0161049	1.79304	zbtb4
ENSDARG00000002968	19.3606	1.25082	0.394628	3.16962	0.00152637	0.0161718	1.79124	a1cf
ENSDARG00000035564	59.3114	-0.743215	0.234737	-3.16616	0.00154467	0.0163518	1.78643	dgcr8
ENSDARG00000098350	28.5611	-1.20413	0.38041	-3.16535	0.00154899	0.0163836	1.78559	mxd3
ENSDARG00000076657	85.5548	-0.612958	0.193691	-3.16461	0.0015529	0.0164111	1.78486	plagl2
ENSDARG00000038780	64.3482	-0.758467	0.239718	-3.16399	0.00155621	0.0164322	1.7843	ubtfl
ENSDARG00000032970	276.234	-0.520522	0.16455	-3.16332	0.00155982	0.0164564	1.78366	cox4i1
ENSDARG00000077545	13.0438	-1.38385	0.437544	-3.16278	0.00156271	0.016473	1.78323	si:dkey-16p21.7
ENSDARG00000089302	166.782	-0.540721	0.171065	-3.16092	0.00157273	0.0165647	1.78082	hnrnpa0a
ENSDARG00000080019	11.7272	-1.49726	0.473826	-3.15994	0.00157802	0.0166064	1.77972	si:dkey-82j4.2
ENSDARG00000052708	16.5041	1.30371	0.41271	3.15891	0.0015836	0.0166511	1.77856	tnni1b
ENSDARG00000053431	2.23218	-2.03306	0.64379	-3.15796	0.00158879	0.0166916	1.7775	si:ch211-257p13.3
ENSDARG00000052765	2.53142	-2.03107	0.643243	-3.15755	0.00159099	0.0167007	1.77727	gria2b
ENSDARG00000045958	28.5821	-1.0719	0.339548	-3.15685	0.00159481	0.0167268	1.77659	egfl6
ENSDARG00000053857	39.6034	-0.849754	0.269225	-3.15629	0.00159789	0.016745	1.77611	ccdc187
ENSDARG00000073771	9.41069	-1.68071	0.53286	-3.15413	0.00160979	0.0168556	1.77326	tbc1d12b
ENSDARG00000055022	41.2111	-0.973368	0.308773	-3.15237	0.0016195	0.0169289	1.77137	pds5a
ENSDARG00000099194	371.057	-0.460153	0.145966	-3.15247	0.00161893	0.0169289	1.77137	incenp
ENSDARG00000052000	22.8736	1.25752	0.399069	3.15113	0.00162641	0.0169869	1.76989	cav2
ENSDARG00000079198	54.4832	-0.793893	0.252033	-3.14996	0.00163292	0.0170407	1.76851	usp13
ENSDARG00000057940	374.063	-0.432176	0.137343	-3.1467	0.00165126	0.0172178	1.76402	dido1
ENSDARG00000053466	15.4405	-1.30078	0.413838	-3.1432	0.00167109	0.01741	1.7592	timmdc1
ENSDARG00000037361	75.5252	0.764915	0.243412	3.14247	0.00167527	0.017439	1.75848	kdelr2b
ENSDARG00000063153	3.37659	-2.0052	0.638351	-3.14122	0.00168243	0.0174989	1.75699	bcl11ab
ENSDARG00000099439	76.869	0.753973	0.240082	3.14048	0.00168669	0.0175287	1.75625	serp1
ENSDARG00000098317	20.59	-1.27382	0.405802	-3.13903	0.00169506	0.0176011	1.75446	dync1li1
ENSDARG00000079765	5.3128	-1.81824	0.57971	-3.13647	0.00170995	0.0177409	1.75102	si:ch211-112f3.4
ENSDARG00000015184	18.8183	-1.20207	0.383305	-3.13607	0.00171229	0.0177504	1.75079	mpp3a
ENSDARG00000043795	372.532	-0.395287	0.126144	-3.13363	0.00172661	0.0178693	1.74789	arhgdia
ENSDARG00000058148	110.396	-0.625742	0.199678	-3.13376	0.00172585	0.0178693	1.74789	dnajc7
ENSDARG00000039211	16.1399	1.37435	0.438622	3.13334	0.00172828	0.0178718	1.74783	zgc:77439
ENSDARG00000044261	20.4795	1.16764	0.372771	3.13231	0.00173434	0.0179196	1.74667	si:ch211-243g18.2
ENSDARG00000026655	60.13	0.82831	0.264528	3.13127	0.0017405	0.0179684	1.74549	tspo
ENSDARG00000105112	184.917	0.55721	0.177994	3.13051	0.00174504	0.0180004	1.74472	ntn1a
ENSDARG00000059746	47.2686	1.20838	0.386065	3.12998	0.00174819	0.018018	1.74429	plod1a
ENSDARG00000074390	11.1699	1.53871	0.491769	3.12892	0.00175447	0.0180679	1.74309	tmem176l.4
ENSDARG00000039020	37.1505	-0.943297	0.301541	-3.12825	0.00175849	0.0180944	1.74246	fbxo5
ENSDARG00000029818	221.775	0.545574	0.174612	3.1245	0.00178107	0.0183116	1.73727	srsf5a
ENSDARG00000029663	177.525	-0.522986	0.167437	-3.12348	0.00178725	0.0183601	1.73613	rab1ab
ENSDARG00000063661	14.4114	1.36921	0.438411	3.12312	0.00178944	0.018362	1.73608	nuak2
ENSDARG00000103308	5.58494	1.90519	0.610059	3.12297	0.00179038	0.018362	1.73608	mst1
ENSDARG00000011921	48.7035	-0.888169	0.284455	-3.12235	0.00179414	0.0183705	1.73588	txnl1
ENSDARG00000051762	19.6252	-1.2471	0.399396	-3.12245	0.0017935	0.0183705	1.73588	-
ENSDARG00000052567	73.6293	-0.6728	0.215498	-3.12207	0.00179582	0.0183726	1.73583	tmem35
ENSDARG00000045853	20.0571	-1.15548	0.370299	-3.12041	0.00180599	0.0184616	1.73373	rad51ap1
ENSDARG00000063910	238.825	-0.633653	0.203144	-3.11923	0.00181322	0.0185203	1.73235	ATP8
ENSDARG00000010487	34.9636	-0.967654	0.310409	-3.11735	0.00182487	0.0186241	1.72993	sae1
ENSDARG00000070231	7.27114	-1.70565	0.547396	-3.11593	0.00183368	0.0186988	1.72819	-
ENSDARG00000052565	27.339	-1.04592	0.335733	-3.11533	0.00183741	0.0187215	1.72766	cenpi
ENSDARG00000024829	12.893	-1.54249	0.495183	-3.11499	0.00183953	0.0187279	1.72751	tnw
ENSDARG00000025826	7.06497	1.72214	0.552994	3.11421	0.00184439	0.0187468	1.72707	gna12a
ENSDARG00000104472	4.50228	1.92859	0.619271	3.11428	0.00184392	0.0187468	1.72707	-
ENSDARG00000021351	14.245	-1.46794	0.4721	-3.10937	0.00187484	0.0190408	1.72031	nefma
ENSDARG00000039605	13.1647	1.44273	0.464099	3.10866	0.00187939	0.019056	1.71997	mat1a
ENSDARG00000099139	38.1125	-0.876979	0.2821	-3.10876	0.00187877	0.019056	1.71997	fbxw5
ENSDARG00000093025	7.96669	-1.69	0.543703	-3.10832	0.00188153	0.0190624	1.71982	-
ENSDARG00000006392	26.1578	-1.02222	0.328955	-3.10749	0.00188686	0.0191008	1.71895	exosc9
ENSDARG00000004692	17.057	-1.27469	0.410527	-3.105	0.00190282	0.0192468	1.71564	nabp1a
ENSDARG00000056978	18.3392	-1.17832	0.379653	-3.10368	0.00191131	0.019317	1.71406	letm1
ENSDARG00000037392	154.663	-0.478633	0.154305	-3.10187	0.001923	0.0194195	1.71176	med19a
ENSDARG00000016348	2.68022	-1.99989	0.644803	-3.10155	0.00192512	0.0194253	1.71163	dip2bb
ENSDARG00000002707	7.07194	1.71163	0.552311	3.09903	0.00194155	0.0195752	1.70829	her11
ENSDARG00000036542	12.0857	-1.40392	0.453267	-3.09733	0.00195273	0.019672	1.70615	pknox1.2
ENSDARG00000056196	9.87362	1.54327	0.498328	3.09689	0.00195563	0.0196854	1.70586	slc2a2
ENSDARG00000027828	3.88605	-1.93671	0.626663	-3.09051	0.00199816	0.0200974	1.69686	grin1a
ENSDARG00000003421	3.96378	-1.96791	0.63691	-3.08978	0.00200305	0.0201303	1.69615	igf2bp2a
ENSDARG00000103665	9.25277	-1.64259	0.531845	-3.08848	0.00201183	0.0202024	1.6946	-
ENSDARG00000070098	81.464	-0.662815	0.21463	-3.08817	0.00201392	0.0202071	1.6945	lcorl
ENSDARG00000027547	9.80733	1.54117	0.499144	3.08762	0.00201764	0.0202281	1.69404	zgc:92789
ENSDARG00000024006	4.44357	1.90484	0.617027	3.08713	0.002021	0.0202456	1.69367	rprmb
ENSDARG00000078733	12.1853	1.5638	0.50667	3.08643	0.00202575	0.0202769	1.693	cnnm2b
ENSDARG00000036895	10.9365	1.44373	0.467845	3.08592	0.00202925	0.0202958	1.69259	dap1b
ENSDARG00000043035	2.24839	-1.98254	0.642655	-3.08492	0.00203604	0.0203473	1.69149	capn3b
ENSDARG00000035352	10.2948	-1.48065	0.480065	-3.08427	0.00204054	0.0203761	1.69088	pafah1b2
ENSDARG00000042561	2.59981	1.9898	0.64535	3.08329	0.00204729	0.0204271	1.68979	lpar2b
ENSDARG00000101074	40.5771	-0.978006	0.317267	-3.08259	0.00205206	0.0204584	1.68913	glud1b
ENSDARG00000060309	72.0161	-0.683307	0.22173	-3.08171	0.00205816	0.0205029	1.68818	srgap3
ENSDARG00000105116	158.707	0.512406	0.166321	3.08082	0.00206433	0.0205479	1.68723	p4hb
ENSDARG00000006031	22.645	1.28494	0.417511	3.07762	0.00208662	0.0207533	1.68291	abat
ENSDARG00000004074	31.7259	-0.941573	0.306039	-3.07665	0.00209344	0.0208046	1.68184	bach2b
ENSDARG00000074242	2770.12	0.304964	0.0991542	3.07565	0.00210041	0.0208573	1.68074	serbp1a
ENSDARG00000074502	120.087	-0.684101	0.222491	-3.07473	0.00210691	0.0209052	1.67975	zmiz1a
ENSDARG00000030449	16.8145	1.40869	0.458221	3.07426	0.00211027	0.020922	1.6794	crabp2b
ENSDARG00000011611	47.8411	-0.847934	0.275848	-3.07392	0.00211268	0.0209284	1.67926	actr1
ENSDARG00000042563	20.2785	-1.12094	0.364687	-3.07369	0.00211426	0.0209284	1.67926	mis18bp1
ENSDARG00000004517	24.1885	1.09319	0.355826	3.07226	0.00212445	0.0210126	1.67752	ppat
ENSDARG00000003940	36.0248	-0.950429	0.309395	-3.07189	0.00212706	0.0210218	1.67733	mtfr1l
ENSDARG00000056250	6.11509	1.78125	0.580238	3.06987	0.00214152	0.021148	1.67473	add3b
ENSDARG00000044899	6.40186	-1.77012	0.577136	-3.06708	0.00216163	0.0213165	1.67128	tmem183a
ENSDARG00000063916	22.5402	-1.15602	0.376917	-3.06703	0.002162	0.0213165	1.67128	ND4L
ENSDARG00000036040	24.2819	1.04708	0.341448	3.06659	0.00216512	0.0213305	1.671	atg13
ENSDARG00000099805	12.0105	1.47912	0.482393	3.0662	0.00216797	0.0213417	1.67077	LOC100332847
ENSDARG00000090903	6.8779	1.76779	0.577151	3.06296	0.00219159	0.0215572	1.66641	creb3l3b
ENSDARG00000006409	39.2419	-0.905232	0.295604	-3.06231	0.00219634	0.0215577	1.6664	mapk12b
ENSDARG00000031616	3.03138	1.96543	0.641826	3.06225	0.00219681	0.0215577	1.6664	g6pca.1
ENSDARG00000055505	5.27566	1.86178	0.607921	3.06253	0.00219472	0.0215577	1.6664	pdgfaa; LOC103909601
ENSDARG00000101613	7.24801	1.71314	0.559907	3.05969	0.00221564	0.0217254	1.66303	si:dkey-238i5.2
ENSDARG00000015010	3.63421	1.92576	0.629535	3.05901	0.00222067	0.0217428	1.66269	ccdc114
ENSDARG00000019300	15.9793	1.30053	0.425183	3.05875	0.00222262	0.0217428	1.66269	ints7
ENSDARG00000040649	40.7056	1.08601	0.355048	3.05878	0.00222237	0.0217428	1.66269	prickle1a
ENSDARG00000017988	9.3627	1.57179	0.513925	3.05841	0.00222518	0.0217507	1.66253	dse
ENSDARG00000003607	50.0202	0.765019	0.250274	3.05672	0.00223772	0.0218563	1.66042	nr2f6a
ENSDARG00000079895	31.9409	-0.959709	0.314069	-3.05573	0.00224517	0.0219118	1.65932	-
ENSDARG00000037030	84.6205	-0.646681	0.211717	-3.05446	0.00225463	0.0219871	1.65783	casz1
ENSDARG00000098359	18.0381	1.32112	0.432955	3.0514	0.00227778	0.0221955	1.65374	il17rd
ENSDARG00000042187	105.51	-0.611894	0.200612	-3.05013	0.00228744	0.0222723	1.65224	smek1
ENSDARG00000031756	61.4666	-0.807748	0.264956	-3.04861	0.00229903	0.0223558	1.65061	mef2aa
ENSDARG00000076135	5.7637	1.81405	0.595055	3.04854	0.00229959	0.0223558	1.65061	mmrn2a
ENSDARG00000070447	12.5538	1.46381	0.480445	3.04678	0.00231304	0.022469	1.64842	slc39a9
ENSDARG00000056995	9.41178	1.60919	0.528237	3.04634	0.00231645	0.0224847	1.64811	snai1a
ENSDARG00000018898	45.6778	0.895599	0.29404	3.04584	0.00232031	0.0224872	1.64806	zfand5a
ENSDARG00000043126	24.4782	1.2606	0.413862	3.04594	0.00231952	0.0224872	1.64806	blf
ENSDARG00000057323	57.8302	-0.775867	0.254758	-3.04551	0.00232286	0.0224945	1.64792	e2f8
ENSDARG00000044562	249.064	-0.609602	0.200226	-3.04457	0.0023301	0.0225472	1.64691	cycsb
ENSDARG00000011175	59.3673	0.710945	0.233598	3.04345	0.00233881	0.0226139	1.64562	atp6v1d
ENSDARG00000029639	99.4284	-0.618539	0.203256	-3.04315	0.00234117	0.0226192	1.64552	tomm70a
ENSDARG00000044943	87.4058	-0.609087	0.200201	-3.04237	0.0023472	0.02266	1.64474	npepps
ENSDARG00000037229	128.404	-0.582018	0.191411	-3.04067	0.00236056	0.0227714	1.64261	denr
ENSDARG00000023920	13.6576	1.39294	0.458287	3.03945	0.00237007	0.0228455	1.6412	llgl2
ENSDARG00000025889	18.773	-1.2153	0.400335	-3.03571	0.0023997	0.0230955	1.63647	usp14
ENSDARG00000078391	13.9206	-1.29418	0.426287	-3.03593	0.00239796	0.0230955	1.63647	fam98a
ENSDARG00000014626	22.7759	1.2271	0.404269	3.03535	0.00240253	0.0231049	1.6363	dlx3b
ENSDARG00000002970	76.4862	-0.671494	0.221329	-3.03392	0.00241401	0.0231897	1.63471	ss18
ENSDARG00000017762	156.211	-0.501544	0.165319	-3.03379	0.00241505	0.0231897	1.63471	srrt
ENSDARG00000077403	33.1706	1.07127	0.353785	3.02802	0.00246163	0.0236188	1.62674	col8a1a
ENSDARG00000100712	3.78805	1.91561	0.633136	3.02559	0.00248148	0.023791	1.62359	-
ENSDARG00000075942	13.0755	-1.44765	0.478622	-3.02463	0.00248935	0.0238482	1.62254	-
ENSDARG00000001785	9.04248	-1.55355	0.513824	-3.02351	0.00249857	0.0238633	1.62227	irx2a
ENSDARG00000007682	60.6853	0.750948	0.248318	3.02414	0.00249341	0.0238633	1.62227	ppdpfa
ENSDARG00000012932	10.6801	1.49163	0.493293	3.02383	0.00249595	0.0238633	1.62227	mat2b
ENSDARG00000070432	50.7764	-0.868226	0.287153	-3.02357	0.00249814	0.0238633	1.62227	ino80
ENSDARG00000035986	26.1858	-1.05672	0.349534	-3.02324	0.00250087	0.023867	1.6222	ptpn2b
ENSDARG00000010596	32.5221	-0.940434	0.311204	-3.02192	0.00251175	0.0239297	1.62106	slc7a6os
ENSDARG00000039302	26.5083	1.09244	0.361477	3.02215	0.00250986	0.0239297	1.62106	terfa
ENSDARG00000099117	24.5389	-1.13758	0.376463	-3.02175	0.00251317	0.0239297	1.62106	si:dkey-33i11.4
ENSDARG00000014746	42.7911	-0.881115	0.291689	-3.02073	0.00252164	0.0239805	1.62014	rbfox1
ENSDARG00000020866	9.18131	1.586	0.525055	3.02065	0.00252235	0.0239805	1.62014	apoa4b.2
ENSDARG00000103590	6.29833	1.76668	0.58495	3.02023	0.00252582	0.0239953	1.61987	-
ENSDARG00000042010	13.0988	1.47324	0.487927	3.01939	0.00253288	0.0240441	1.61899	-
ENSDARG00000088492	26.0548	-1.07271	0.355336	-3.01885	0.00253738	0.0240685	1.61855	cntrl
ENSDARG00000003132	16.1231	1.40094	0.464137	3.01837	0.00254135	0.0240713	1.6185	apip
ENSDARG00000026726	100.389	0.628451	0.20821	3.01835	0.00254153	0.0240713	1.6185	anxa1a
ENSDARG00000105010	15.1675	1.22874	0.407333	3.01654	0.00255675	0.0241972	1.61624	lztfl1
ENSDARG00000010246	348.54	-0.649043	0.215226	-3.01564	0.00256438	0.0242511	1.61527	prmt1
ENSDARG00000052536	40.3399	-0.828114	0.274874	-3.0127	0.00258933	0.0244684	1.61139	tia1
ENSDARG00000018002	12.1641	-1.31697	0.43718	-3.01242	0.00259177	0.024473	1.61131	-
ENSDARG00000078546	11.6448	1.5945	0.529989	3.00855	0.00262497	0.0247613	1.60623	cars2
ENSDARG00000102123	29.5372	0.987642	0.328294	3.0084	0.00262626	0.0247613	1.60623	phtf2
ENSDARG00000070513	8.66174	-1.60657	0.534122	-3.00786	0.00263092	0.0247865	1.60578	brpf3a
ENSDARG00000002344	288.516	0.5366	0.178432	3.0073	0.00263578	0.024795	1.60564	tubb4b
ENSDARG00000018968	11.886	1.45895	0.485117	3.00742	0.00263472	0.024795	1.60564	acvr1ba
ENSDARG00000009862	25.5703	-0.987337	0.328389	-3.00661	0.0026418	0.0248142	1.6053	dcps
ENSDARG00000030278	30.3705	-1.03229	0.343328	-3.00671	0.00264094	0.0248142	1.6053	idh3a
ENSDARG00000101009	44.9402	0.894779	0.297657	3.00607	0.00264646	0.0248393	1.60486	cited4b
ENSDARG00000017960	59.1793	0.856757	0.2852	3.00405	0.00266409	0.0249861	1.6023	sfxn2
ENSDARG00000075560	192.742	-0.444528	0.148099	-3.00155	0.00268605	0.0251732	1.59906	kmt2cb
ENSDARG00000038446	31.4773	0.928169	0.309328	3.0006	0.00269451	0.0252335	1.59802	nrp2b
ENSDARG00000102099	5.30271	-1.75666	0.585536	-3.00009	0.00269904	0.025257	1.59762	-
ENSDARG00000029075	43.3546	0.909798	0.303298	2.99969	0.00270258	0.0252712	1.59737	pfkfb4b
ENSDARG00000014591	137.588	-0.529441	0.176812	-2.99437	0.00275012	0.0256966	1.59013	ilf2
ENSDARG00000079751	55.2599	-0.768481	0.25672	-2.99346	0.00275831	0.0257539	1.58916	megf8
ENSDARG00000045487	858.228	0.409172	0.136834	2.99028	0.00278721	0.0260043	1.58496	rps16
ENSDARG00000098904	5.08413	-1.75844	0.58815	-2.98978	0.00279179	0.0260276	1.58457	pex1
ENSDARG00000025254	52.1267	-0.835226	0.279415	-2.98919	0.00279719	0.0260584	1.58405	s100a10b
ENSDARG00000015918	33.7022	-0.963418	0.322344	-2.98879	0.00280086	0.0260733	1.5838	dlat
ENSDARG00000074663	2.25392	1.92713	0.645002	2.98779	0.00281005	0.0261393	1.58271	zgc:162183
ENSDARG00000029621	24.0781	1.02915	0.344741	2.98527	0.00283324	0.026322	1.57968	sgms1
ENSDARG00000098989	2.71825	-1.91419	0.641225	-2.9852	0.0028339	0.026322	1.57968	LOC101885160
ENSDARG00000031907	82.2237	0.665256	0.222944	2.98395	0.0028455	0.0264101	1.57823	ptbp1b
ENSDARG00000042799	16.8978	-1.27266	0.426556	-2.98356	0.00284916	0.0264245	1.57799	atpaf1
ENSDARG00000100244	63.263	-0.712794	0.238951	-2.98301	0.00285429	0.0264525	1.57753	ebf3a
ENSDARG00000059596	48.4122	-0.791475	0.265488	-2.98121	0.0028711	0.0265885	1.57531	clip2
ENSDARG00000007818	41.6411	0.871543	0.292448	2.98016	0.00288096	0.0266378	1.5745	palm1b
ENSDARG00000016173	258.095	-0.41856	0.14045	-2.98013	0.00288123	0.0266378	1.5745	cct3
ENSDARG00000042128	35.976	0.933074	0.313116	2.97997	0.00288281	0.0266378	1.5745	pacsin1b
ENSDARG00000094965	32.1178	-0.938598	0.315175	-2.97802	0.00290117	0.0267876	1.57207	nfil3-5
ENSDARG00000076557	14.9624	1.38997	0.46718	2.97524	0.00292756	0.0269975	1.56868	bicc2
ENSDARG00000089719	10.3529	-1.50211	0.50488	-2.97517	0.00292822	0.0269975	1.56868	si:dkey-108k21.11
ENSDARG00000014222	117.563	0.621159	0.208839	2.97435	0.00293614	0.0270506	1.56782	zgc:86598
ENSDARG00000011602	4.90668	-1.76631	0.593973	-2.97372	0.00294217	0.0270675	1.56755	si:dkeyp-117h8.2
ENSDARG00000071353	96.4853	-0.615823	0.20709	-2.9737	0.00294231	0.0270675	1.56755	si:ch211-235e9.8
ENSDARG00000092673	14.7724	-1.43906	0.484395	-2.97083	0.00296993	0.0273015	1.56381	-
ENSDARG00000076791	12.055	-1.39305	0.468969	-2.97045	0.00297363	0.0273154	1.56359	cdk13
ENSDARG00000014018	12.6113	-1.56464	0.526875	-2.96966	0.0029813	0.0273658	1.56279	lhx1a
ENSDARG00000018010	47.941	0.803084	0.27047	2.96922	0.00298558	0.027376	1.56263	crtap
ENSDARG00000019060	118.577	-0.64273	0.216473	-2.96909	0.00298679	0.027376	1.56263	snx12
ENSDARG00000016375	41.9021	1.062	0.357753	2.96852	0.00299239	0.0274072	1.56213	asns
ENSDARG00000019920	3.65079	1.87766	0.632601	2.96815	0.00299597	0.0274199	1.56193	lft1
ENSDARG00000034056	65.3418	-0.754754	0.25445	-2.96622	0.00301489	0.0275729	1.55952	csnk1g2b
ENSDARG00000009629	28.2032	0.977267	0.32972	2.96393	0.00303733	0.0277578	1.55661	unc119.1
ENSDARG00000035890	33.6563	0.938658	0.317195	2.95925	0.00308388	0.0281626	1.55033	fuca1.1
ENSDARG00000038826	17.0948	-1.29616	0.438051	-2.95893	0.00308707	0.0281712	1.5502	jph1b
ENSDARG00000075354	31.3484	-0.901225	0.304642	-2.95831	0.00309332	0.0282076	1.54963	espl1
ENSDARG00000008748	156.452	-0.493296	0.166783	-2.95772	0.00309927	0.0282413	1.54911	ube2na
ENSDARG00000088318	94.9087	-0.590752	0.199764	-2.95725	0.00310401	0.0282639	1.54877	ubap2a
ENSDARG00000015998	29.0375	-0.921974	0.311889	-2.9561	0.00311557	0.0283361	1.54766	wdhd1
ENSDARG00000069888	3.72991	1.87388	0.633922	2.95601	0.00311647	0.0283361	1.54766	cldna
ENSDARG00000033537	28.6333	1.03601	0.350701	2.95412	0.00313562	0.0284894	1.54532	p4ha1a
ENSDARG00000045230	10.3342	1.47924	0.501452	2.94992	0.00317852	0.0288583	1.53973	cox6b1
ENSDARG00000103730	48.0552	0.827123	0.280511	2.94863	0.00319185	0.0289583	1.53823	-
ENSDARG00000029292	20.0662	-1.0705	0.363101	-2.94822	0.0031961	0.0289753	1.53797	zgc:55943
ENSDARG00000100719	37.7273	1.00192	0.339863	2.948	0.00319837	0.0289753	1.53797	uraha
ENSDARG00000027357	100.732	-0.562575	0.190954	-2.94614	0.00321772	0.0290874	1.53629	cd2bp2
ENSDARG00000055912	16.3061	1.33533	0.453211	2.94638	0.00321519	0.0290874	1.53629	nipa2
ENSDARG00000094210	14.7087	1.37107	0.465359	2.94627	0.00321633	0.0290874	1.53629	zgc:109934; zgc:194125; LOC100006428; zgc:173594
ENSDARG00000075192	46.8483	0.824969	0.280094	2.94533	0.00322615	0.0291426	1.53547	yme1l1a
ENSDARG00000013979	19.3665	1.15197	0.391266	2.94421	0.00323782	0.0292211	1.5343	ndfip1
ENSDARG00000077293	12.6814	-1.39429	0.473596	-2.94405	0.00323952	0.0292211	1.5343	synpo2la
ENSDARG00000070512	14.964	-1.3376	0.454382	-2.94378	0.00324232	0.0292253	1.53424	tnrc5
ENSDARG00000009733	15.7901	-1.24708	0.423691	-2.94337	0.00324656	0.0292425	1.53399	-
ENSDARG00000005423	25.2113	1.19641	0.406718	2.94162	0.00326504	0.0293877	1.53183	pgam1a
ENSDARG00000054848	13.0721	1.48053	0.503771	2.93889	0.00329388	0.0296063	1.52862	-
ENSDARG00000070061	15.5035	1.26818	0.431517	2.93888	0.00329406	0.0296063	1.52862	gfer
ENSDARG00000068177	114.056	0.541998	0.184556	2.93678	0.00331645	0.0297861	1.52599	pak2a
ENSDARG00000094316	5.12117	1.80643	0.615415	2.93531	0.00333215	0.0299056	1.52425	si:rp71-80o10.4
ENSDARG00000014499	28.2664	-1.04108	0.354704	-2.93508	0.00333467	0.0299067	1.52423	nutf2l
ENSDARG00000008803	373.024	-0.366557	0.124945	-2.93374	0.00334902	0.0300139	1.52268	marcksb
ENSDARG00000008852	13.7285	1.24841	0.425784	2.93203	0.00336755	0.0301584	1.52059	elp4
ENSDARG00000080677	7.04288	-1.64272	0.560444	-2.9311	0.00337762	0.030227	1.51961	-
ENSDARG00000055510	13.0148	1.33059	0.454036	2.93059	0.00338322	0.0302553	1.5192	ypel3
ENSDARG00000015292	48.8729	-0.859432	0.293558	-2.92764	0.00341545	0.0305201	1.51541	ube2g1a
ENSDARG00000060030	60.8399	-0.70254	0.239985	-2.92743	0.00341771	0.0305201	1.51541	setd1a
ENSDARG00000061918	46.8024	-0.808516	0.276341	-2.92579	0.00343584	0.0306602	1.51343	cplx2
ENSDARG00000089640	9.69299	1.4393	0.492122	2.92467	0.00344816	0.0307482	1.51218	si:dkey-117n7.5
ENSDARG00000016809	22.2061	-1.16042	0.396825	-2.92426	0.00345272	0.0307586	1.51203	prkacab
ENSDARG00000094978	2.15753	1.88495	0.644621	2.92413	0.00345425	0.0307586	1.51203	-
ENSDARG00000026907	2.25686	1.88396	0.644477	2.92324	0.00346404	0.0308031	1.51141	slc48a1a
ENSDARG00000069808	12.2881	1.43024	0.489267	2.92323	0.00346418	0.0308031	1.51141	ostm1
ENSDARG00000040184	1112.02	0.295142	0.100981	2.92274	0.0034697	0.0308083	1.51133	syncrip
ENSDARG00000089243	13.6876	-1.20881	0.413563	-2.92291	0.00346779	0.0308083	1.51133	r3hcc1l
ENSDARG00000089790	69.9487	0.736442	0.25206	2.92169	0.00348134	0.0308898	1.51018	efna5a
ENSDARG00000052103	9.66772	-1.53379	0.52511	-2.92089	0.00349033	0.0309415	1.50946	dtymk
ENSDARG00000103278	4.29573	-1.82126	0.623565	-2.92073	0.00349212	0.0309415	1.50946	-
ENSDARG00000037060	37.449	-0.839132	0.287336	-2.92039	0.00349594	0.0309534	1.50929	-
ENSDARG00000035151	9.8064	1.43317	0.490825	2.91992	0.00350125	0.0309785	1.50894	si:dkey-261j4.3
ENSDARG00000077060	78.7279	-0.672479	0.230389	-2.91889	0.00351285	0.0310153	1.50842	LOC567058
ENSDARG00000078803	22.7579	1.09326	0.374527	2.91906	0.00351093	0.0310153	1.50842	gas2l1
ENSDARG00000092651	36.1268	-0.976624	0.334547	-2.91924	0.00350884	0.0310153	1.50842	si:dkey-57a22.11
ENSDARG00000102891	29.0984	-0.930198	0.318924	-2.91667	0.00353785	0.0312139	1.50565	ppp1r26
ENSDARG00000053122	9.87294	-1.47109	0.504524	-2.91579	0.00354784	0.03128	1.50473	clvs2
ENSDARG00000104559	148.014	0.544166	0.186876	2.91191	0.00359231	0.0316498	1.49963	tmem63ba
ENSDARG00000029533	1766.57	0.279815	0.0961112	2.91136	0.00359855	0.0316824	1.49918	rpl18
ENSDARG00000044155	40.8312	0.845869	0.290567	2.9111	0.00360164	0.0316873	1.49911	mafaa
ENSDARG00000055113	40.3683	-0.820648	0.282003	-2.91007	0.00361348	0.0317691	1.49799	pom121
ENSDARG00000092873	138.766	-0.502008	0.172673	-2.90728	0.00364591	0.0320318	1.49442	zgc:193541
ENSDARG00000076229	68.3621	0.677865	0.233261	2.90603	0.00366042	0.0321366	1.493	mkl1b
ENSDARG00000063375	4.06169	1.80095	0.619778	2.90579	0.00366326	0.032139	1.49297	pter
ENSDARG00000007294	50.9081	-0.822754	0.28319	-2.90531	0.00366895	0.0321663	1.4926	aco2
ENSDARG00000095580	22.1992	1.14607	0.394517	2.905	0.00367259	0.0321757	1.49247	si:ch211-67e16.11
ENSDARG00000002131	104.829	-0.56405	0.194184	-2.90472	0.00367576	0.0321809	1.4924	celf2
ENSDARG00000030656	8.76944	-1.43992	0.496219	-2.90178	0.00371054	0.0324627	1.48862	42981
ENSDARG00000017121	34.5908	1.16553	0.401723	2.90133	0.00371577	0.0324857	1.48831	-
ENSDARG00000026369	110.519	0.590417	0.203541	2.90073	0.00372294	0.0325256	1.48777	dbi
ENSDARG00000074908	8.6865	-1.59113	0.548604	-2.90032	0.00372783	0.0325457	1.48751	col6a1
ENSDARG00000025350	205.471	-0.524596	0.180964	-2.89889	0.00374488	0.0326717	1.48583	prdx2
ENSDARG00000002750	16.7759	-1.25049	0.431511	-2.89793	0.00375638	0.0327292	1.48506	phf20a
ENSDARG00000079525	5.6264	1.69216	0.583927	2.8979	0.00375671	0.0327292	1.48506	slc39a5
ENSDARG00000044619	25.8488	0.969133	0.334494	2.89731	0.00376381	0.0327682	1.48455	birc2
ENSDARG00000090872	145.942	-0.466091	0.160937	-2.8961	0.00377827	0.0328712	1.48318	si:dkey-276j7.1
ENSDARG00000062506	106.028	-0.635595	0.21951	-2.89552	0.00378534	0.0329098	1.48267	zc3h18
ENSDARG00000054829	7.33145	-1.50626	0.520275	-2.89512	0.00379015	0.0329287	1.48243	pik3c3
ENSDARG00000020143	6.41484	-1.70225	0.58821	-2.89396	0.00380422	0.0329551	1.48208	pah
ENSDARG00000027899	96.1247	-0.553748	0.191348	-2.89393	0.00380454	0.0329551	1.48208	-
ENSDARG00000041299	20.2681	-1.0922	0.377432	-2.89378	0.00380636	0.0329551	1.48208	zgc:110796
ENSDARG00000060797	2.77168	-1.86955	0.646004	-2.89402	0.00380347	0.0329551	1.48208	pfkmb
ENSDARG00000077341	46.5193	0.785415	0.271367	2.89429	0.00380012	0.0329551	1.48208	ppp1r14c
ENSDARG00000027182	19.9557	1.10635	0.382502	2.89241	0.00382301	0.0330763	1.48048	rnf25
ENSDARG00000030155	63.8298	-0.724189	0.250535	-2.89057	0.00384546	0.0332475	1.47824	ssbp3b
ENSDARG00000057027	5.33524	-1.72194	0.595863	-2.88982	0.00385466	0.033304	1.4775	rtn2b
ENSDARG00000057586	15.184	-1.21896	0.421877	-2.88937	0.00386012	0.0333052	1.47749	sall3b
ENSDARG00000078847	17.1684	1.23752	0.428289	2.88945	0.0038592	0.0333052	1.47749	si:dkey-238o13.4
ENSDARG00000045092	17.7635	1.17086	0.405453	2.88779	0.00387959	0.0334041	1.4762	cdk5rap3
ENSDARG00000057691	239.855	-0.463283	0.160412	-2.88807	0.00387611	0.0334041	1.4762	srsf1a
ENSDARG00000077202	7.41574	-1.53029	0.529883	-2.88798	0.00387728	0.0334041	1.4762	LOC103911725
ENSDARG00000029472	104.36	-0.582302	0.201662	-2.88751	0.00388303	0.0334107	1.47611	mllt4a
ENSDARG00000091001	38.1744	0.820315	0.284124	2.88718	0.00388716	0.0334232	1.47595	-
ENSDARG00000006192	50.9687	0.693042	0.240156	2.8858	0.00390423	0.0335187	1.47471	gatad2ab
ENSDARG00000075989	101.173	0.575027	0.199272	2.88563	0.00390631	0.0335187	1.47471	arpc2
ENSDARG00000102750	82.5552	0.727342	0.252045	2.88576	0.00390465	0.0335187	1.47471	cdh1
ENSDARG00000098980	2.34566	-1.86378	0.646002	-2.88511	0.00391282	0.0335515	1.47429	-
ENSDARG00000017834	9.74171	-1.40883	0.48844	-2.88434	0.00392233	0.0335869	1.47383	micall2b
ENSDARG00000078640	23.5904	-0.962396	0.333651	-2.88444	0.00392107	0.0335869	1.47383	fam117aa
ENSDARG00000034195	158.495	-0.486082	0.168613	-2.88284	0.00394112	0.0337248	1.47205	top2b
ENSDARG00000100254	11.5871	1.3564	0.470951	2.88014	0.003975	0.0339915	1.46863	zgc:85789
ENSDARG00000075445	53.8385	-0.782803	0.271843	-2.87961	0.00398167	0.0340252	1.4682	psmb5
ENSDARG00000005699	147.478	-0.554451	0.192576	-2.87912	0.00398783	0.0340313	1.46812	ddx19
ENSDARG00000059263	11.8684	1.33068	0.462179	2.87914	0.0039876	0.0340313	1.46812	hoxd12a
ENSDARG00000016319	32.8105	0.98025	0.340687	2.87727	0.00401126	0.0342079	1.46587	c9
ENSDARG00000001733	11.1235	1.31935	0.458687	2.87637	0.0040228	0.0342829	1.46492	gulp1a
ENSDARG00000069654	2.63293	-1.85669	0.645974	-2.87425	0.0040499	0.0344903	1.4623	ppp6r2b
ENSDARG00000057738	118.105	-0.583988	0.203249	-2.87327	0.00406253	0.0345744	1.46125	hells
ENSDARG00000016163	12.6981	-1.24678	0.434309	-2.87072	0.00409534	0.0348062	1.45834	usp33
ENSDARG00000038954	15.6015	-1.12248	0.391009	-2.87072	0.00409532	0.0348062	1.45834	ctnnbip1
ENSDARG00000054271	27.6332	0.962027	0.335163	2.87033	0.00410048	0.0348262	1.45809	cdkn1bb
ENSDARG00000014190	4.26521	-1.73094	0.603193	-2.86963	0.00410952	0.0348793	1.45743	sst2
ENSDARG00000006878	59.9418	-0.647071	0.225564	-2.86868	0.00412193	0.0349609	1.45642	phf21aa
ENSDARG00000038147	650.13	0.524231	0.182824	2.86741	0.00413842	0.035077	1.45498	hbbe3
ENSDARG00000030949	54.5365	0.825193	0.288083	2.86442	0.00417768	0.0353781	1.45127	srprb
ENSDARG00000063924	1437.63	-0.383763	0.133982	-2.86428	0.0041796	0.0353781	1.45127	CYTB
ENSDARG00000019302	19.7939	-1.06226	0.371132	-2.8622	0.00420707	0.0355865	1.44871	mid1ip1b
ENSDARG00000055647	24.8746	1.02739	0.359113	2.86091	0.00422432	0.0357082	1.44723	ftr82
ENSDARG00000015128	1364.6	0.399318	0.139663	2.85916	0.00424765	0.0358811	1.44513	rpl27
ENSDARG00000040657	39.6423	0.811612	0.283898	2.85882	0.00425227	0.0358959	1.44496	wipi1
ENSDARG00000102907	4.95377	1.69052	0.591483	2.8581	0.00426187	0.0359527	1.44427	-
ENSDARG00000076299	30.7536	1.13221	0.396228	2.85748	0.00427016	0.0359983	1.44372	emilin3
ENSDARG00000071051	40.7789	-0.759725	0.265905	-2.85713	0.00427486	0.0360137	1.44353	cbx6a
ENSDARG00000004539	6.0634	1.62728	0.569872	2.85552	0.0042967	0.0361733	1.44161	ptgs2a
ENSDARG00000045075	9.71913	1.43359	0.502439	2.85327	0.00432716	0.0363807	1.43913	tmem106a
ENSDARG00000095796	26.5732	0.941778	0.33006	2.85335	0.00432607	0.0363807	1.43913	si:dkey-87o1.2
ENSDARG00000056029	49.0758	0.803471	0.281641	2.85282	0.00433327	0.0364077	1.43881	cyp26c1
ENSDARG00000009285	2060.88	0.291249	0.102138	2.85152	0.00435106	0.0364255	1.43859	rpl15
ENSDARG00000011065	22.8663	-0.971336	0.340624	-2.85164	0.00434949	0.0364255	1.43859	camk2b1
ENSDARG00000017591	232.831	0.441294	0.154759	2.85148	0.00435157	0.0364255	1.43859	fat1a
ENSDARG00000029688	2.46263	1.83303	0.642797	2.85165	0.00434924	0.0364255	1.43859	hsp70.1
ENSDARG00000033172	88.4134	0.602882	0.211434	2.85139	0.00435288	0.0364255	1.43859	nr2f5
ENSDARG00000044968	14.9109	-1.23044	0.431362	-2.85244	0.00433846	0.0364255	1.43859	vcla
ENSDARG00000061736	52.9857	-0.695641	0.244072	-2.85015	0.00436987	0.0365433	1.43719	ank3a
ENSDARG00000023028	363.18	-0.473081	0.166	-2.84989	0.0043734	0.0365483	1.43713	cdv3
ENSDARG00000070981	136.461	-0.630727	0.221362	-2.8493	0.00438152	0.0365917	1.43662	ash1l
ENSDARG00000056929	186.496	-0.540028	0.189554	-2.84895	0.00438643	0.0365981	1.43654	kdm6bb
ENSDARG00000087443	9.88651	-1.42288	0.499462	-2.84882	0.00438814	0.0365981	1.43654	ptp4a2a
ENSDARG00000070959	865.246	-0.335344	0.117765	-2.84758	0.00440527	0.0366676	1.43572	si:ch211-288g17.3
ENSDARG00000075622	52.9597	0.756221	0.265556	2.84768	0.00440387	0.0366676	1.43572	zgc:174938
ENSDARG00000103878	2.24739	1.83212	0.643329	2.84788	0.00440111	0.0366676	1.43572	anpepb
ENSDARG00000091402	29.4578	0.90687	0.31851	2.84722	0.00441023	0.0366844	1.43552	eif2b1
ENSDARG00000034307	5.39097	-1.67998	0.590294	-2.84601	0.00442712	0.0368004	1.43415	chrne
ENSDARG00000068516	31.7748	0.942672	0.33141	2.84443	0.00444913	0.0369588	1.43228	hapln1b
ENSDARG00000077428	4.03829	-1.7655	0.621393	-2.8412	0.00449441	0.0373102	1.42817	camta1a
ENSDARG00000013776	29.2657	-1.0231	0.360243	-2.84004	0.00451079	0.0374213	1.42688	thop1
ENSDARG00000058730	17.8487	1.10599	0.389621	2.83864	0.00453069	0.0375615	1.42526	rdh10a
ENSDARG00000076559	43.7598	-0.735844	0.259262	-2.83823	0.00453643	0.0375841	1.425	rb1cc1
ENSDARG00000058062	34.8183	0.905887	0.319638	2.83411	0.00459538	0.0380474	1.41968	magt1
ENSDARG00000074073	6.30803	-1.56142	0.55151	-2.83117	0.00463783	0.0383734	1.41597	map6b
ENSDARG00000103522	49.0138	-0.773512	0.273258	-2.8307	0.00464457	0.0384037	1.41563	si:zfos-943e10.1
ENSDARG00000006754	32.5977	1.00263	0.354321	2.82973	0.00465873	0.0384699	1.41488	mllt3
ENSDARG00000075252	175.92	-0.466758	0.16494	-2.82986	0.00465689	0.0384699	1.41488	phrf1
ENSDARG00000012244	156.997	0.443953	0.156902	2.82949	0.00466217	0.0384729	1.41485	ube2e3
ENSDARG00000105293	60.9209	-0.699197	0.24716	-2.82892	0.00467048	0.0385161	1.41436	srsf4
ENSDARG00000056092	2.84321	-1.82537	0.645443	-2.82809	0.00468259	0.0385905	1.41352	si:dkey-12h9.6
ENSDARG00000002172	20.7508	1.01905	0.360379	2.82772	0.00468814	0.0386108	1.41329	aplnra
ENSDARG00000076472	6.80848	1.53617	0.543354	2.82721	0.00469559	0.0386467	1.41289	ovol1
ENSDARG00000025299	25.8947	0.988951	0.349998	2.82559	0.00471939	0.038817	1.41098	tspan9a
ENSDARG00000103962	101.533	-0.52283	0.185051	-2.82533	0.00472325	0.0388232	1.41091	add1
ENSDARG00000062082	31.5651	1.00349	0.355206	2.82508	0.00472684	0.0388272	1.41086	hipk3b
ENSDARG00000032856	10.1031	1.44699	0.51226	2.82471	0.00473232	0.038842	1.4107	ccdc120
ENSDARG00000075569	84.6068	-0.63067	0.223282	-2.82454	0.00473486	0.038842	1.4107	gpbp1l1
ENSDARG00000021488	15.2701	1.21357	0.429727	2.82405	0.0047421	0.0388759	1.41032	cyth1b
ENSDARG00000007135	113.329	-0.559802	0.198396	-2.82165	0.00477777	0.0391426	1.40735	cnot3a
ENSDARG00000055429	27.5565	-0.973254	0.34503	-2.82078	0.00479068	0.0392227	1.40646	kat6b
ENSDARG00000056745	5.83192	-1.6308	0.578328	-2.81986	0.00480452	0.0393103	1.40549	necab2
ENSDARG00000099129	11.8764	-1.26656	0.449231	-2.8194	0.00481135	0.0393404	1.40516	phlda1
ENSDARG00000099203	51.2148	-0.709653	0.251801	-2.81831	0.00482775	0.0394487	1.40397	atp1b2a
ENSDARG00000076815	790.392	0.307927	0.109278	2.81783	0.00483496	0.0394818	1.4036	eif3s10
ENSDARG00000055357	85.6965	-0.578537	0.205367	-2.81708	0.00484617	0.0395475	1.40288	leo1
ENSDARG00000017673	809.578	-0.33071	0.117444	-2.81589	0.00486416	0.0396035	1.40227	nova2
ENSDARG00000037760	6.47478	1.64131	0.58284	2.81606	0.00486162	0.0396035	1.40227	uncx4.1
ENSDARG00000043716	168.776	0.477155	0.169457	2.81579	0.0048657	0.0396035	1.40227	cldn5a
ENSDARG00000058801	54.1297	-0.799055	0.283753	-2.81602	0.00486221	0.0396035	1.40227	rev3l
ENSDARG00000042530	53.9046	0.745771	0.264929	2.81498	0.00487798	0.0396776	1.40145	nup205
ENSDARG00000053058	468.82	0.385485	0.136951	2.81477	0.0048812	0.039678	1.40145	rps11
ENSDARG00000103589	30.6984	0.910173	0.323489	2.81361	0.00489885	0.0397956	1.40016	gata6
ENSDARG00000012972	139.43	0.528461	0.187945	2.81178	0.00492677	0.0399964	1.39798	cfl1l
ENSDARG00000076239	38.4592	0.881743	0.313613	2.81157	0.00493008	0.0399973	1.39797	si:ch211-74f19.2
ENSDARG00000015790	55.831	0.781803	0.278121	2.81101	0.00493858	0.0400403	1.3975	atp1b3a
ENSDARG00000100028	39.4371	-0.750563	0.267277	-2.80819	0.0049821	0.0403669	1.39397	-
ENSDARG00000044808	24.2495	-0.911795	0.324957	-2.8059	0.00501766	0.0406287	1.39117	slc4a4b
ENSDARG00000018319	88.8211	-0.54117	0.192931	-2.805	0.00503167	0.0407158	1.39024	arglu1b
ENSDARG00000044588	313.606	0.396018	0.141215	2.80436	0.00504158	0.0407696	1.38966	emp2
ENSDARG00000036558	147.825	0.490966	0.175099	2.80393	0.00504838	0.0407982	1.38936	col18a1a
ENSDARG00000052712	148.956	0.605038	0.215801	2.80369	0.00505221	0.0408028	1.38931	suclg1
ENSDARG00000103472	28.7962	-0.878426	0.31354	-2.80164	0.00508443	0.0410365	1.38683	nedd8l
ENSDARG00000075806	3.09963	-1.7904	0.63932	-2.80048	0.00510269	0.0411573	1.38555	kirrel3a
ENSDARG00000056438	39.2627	0.923582	0.329993	2.7988	0.00512937	0.0413318	1.38372	her9
ENSDARG00000076542	47.8954	-0.734916	0.262592	-2.7987	0.00513094	0.0413318	1.38372	pogzb
ENSDARG00000079501	12.4121	1.26938	0.453603	2.79844	0.00513495	0.0413375	1.38366	si:ch211-149l1.2
ENSDARG00000002582	6.93675	-1.49565	0.534549	-2.79796	0.00514268	0.0413486	1.38354	tbx15
ENSDARG00000042551	4.60925	1.71006	0.611184	2.79794	0.00514294	0.0413486	1.38354	-
ENSDARG00000043279	10.7187	1.3898	0.496819	2.79739	0.00515175	0.0413928	1.38308	aqp12
ENSDARG00000005023	56.9346	0.679877	0.243224	2.79527	0.00518564	0.0416383	1.38051	fkbp9
ENSDARG00000036830	35.7764	0.903326	0.323297	2.79411	0.00520429	0.0417386	1.37946	krt91
ENSDARG00000077946	12.3262	-1.24723	0.446385	-2.79408	0.0052048	0.0417386	1.37946	smarcc2
ENSDARG00000099269	26.838	0.933283	0.334073	2.79365	0.00521164	0.0417666	1.37917	-
ENSDARG00000070537	24.0788	-1.02399	0.3668	-2.79168	0.00524349	0.041995	1.3768	stmn2b
ENSDARG00000038107	11.3923	-1.35512	0.485563	-2.79083	0.00525738	0.0420792	1.37593	sgcg
ENSDARG00000020258	194.426	-0.461461	0.165382	-2.79028	0.00526627	0.0421234	1.37548	ewsr1a
ENSDARG00000006408	57.7605	0.74293	0.266303	2.78979	0.0052742	0.0421599	1.3751	hmgb3b
ENSDARG00000027041	15.1627	-1.10874	0.397923	-2.78632	0.00533094	0.0425862	1.37073	pcdh17
ENSDARG00000003827	16.9258	1.24978	0.448707	2.7853	0.00534783	0.0426666	1.36991	snapc1b
ENSDARG00000019636	11.9907	1.3293	0.477249	2.78534	0.00534708	0.0426666	1.36991	yif1a
ENSDARG00000010124	8.32921	1.52013	0.545817	2.78506	0.0053518	0.0426711	1.36987	sp5l
ENSDARG00000010160	1075.55	0.329254	0.118294	2.78335	0.00538009	0.042842	1.36813	rps15a
ENSDARG00000074332	138.742	-0.51696	0.185733	-2.78336	0.00537999	0.042842	1.36813	wu:fb69f10
ENSDARG00000102640	150.943	0.566619	0.203693	2.78172	0.00540709	0.0430296	1.36623	pdia3
ENSDARG00000074471	17.3896	1.09229	0.392971	2.77957	0.00544317	0.0432892	1.36362	vps39
ENSDARG00000017321	3.90989	1.73334	0.623932	2.77809	0.00546794	0.0434585	1.36193	kdr
ENSDARG00000012684	151.97	0.491767	0.177135	2.77622	0.00549945	0.0436812	1.35971	atp2b1a
ENSDARG00000075565	13.4346	-1.21362	0.437226	-2.77573	0.00550777	0.0437194	1.35933	-
ENSDARG00000058328	48.6112	-0.802945	0.289399	-2.77453	0.00552823	0.0438541	1.35799	lsm7
ENSDARG00000101844	187.278	0.476191	0.171674	2.77381	0.00554038	0.0439226	1.35731	mibp2
ENSDARG00000092553	1539.73	0.283897	0.10236	2.77351	0.00554557	0.0439358	1.35718	slc25a5
ENSDARG00000015072	11.484	1.40666	0.507367	2.77247	0.00556319	0.0440475	1.35608	dmrt2a
ENSDARG00000076939	23.0021	0.993964	0.358647	2.77143	0.00558114	0.04415	1.35507	znf451
ENSDARG00000098745	14.052	1.25885	0.454246	2.77131	0.0055832	0.04415	1.35507	tfec
ENSDARG00000054201	103.958	-0.513567	0.185343	-2.7709	0.00559022	0.0441776	1.3548	-
ENSDARG00000079834	6.0853	1.61123	0.581719	2.76977	0.00560959	0.0443027	1.35357	kdf1a
ENSDARG00000100917	16.8467	1.24884	0.451857	2.76379	0.0057135	0.0450948	1.34587	-
ENSDARG00000006983	4.43379	-1.6537	0.59849	-2.76313	0.00572504	0.0451573	1.34527	celf3b
ENSDARG00000036995	36.7223	-0.982735	0.355696	-2.76285	0.00572988	0.0451671	1.34518	lsm6
ENSDARG00000015869	3.41779	-1.73003	0.626626	-2.76086	0.00576494	0.0454148	1.3428	slc22a16
ENSDARG00000014366	35.0611	-0.874261	0.316699	-2.76054	0.00577062	0.0454309	1.34265	luc7l3
ENSDARG00000060115	20.3484	-1.12082	0.406112	-2.75988	0.00578231	0.0454943	1.34204	lrrn1
ENSDARG00000008287	34.0998	0.824419	0.299033	2.75695	0.00583433	0.0458748	1.33843	fam114a1
ENSDARG00000002991	15.2857	-1.14012	0.413611	-2.75651	0.00584213	0.0458784	1.33839	cep135
ENSDARG00000011740	252.67	-0.381573	0.138421	-2.75661	0.00584042	0.0458784	1.33839	u2af2b
ENSDARG00000003797	4.31602	-1.68792	0.612458	-2.75598	0.00585167	0.0459244	1.33796	asb2a.1
ENSDARG00000063711	16.9635	-1.07457	0.389978	-2.75547	0.00586085	0.0459676	1.33755	trim3a
ENSDARG00000020876	8.54864	1.4949	0.542598	2.75507	0.0058679	0.0459941	1.3373	pdk2a
ENSDARG00000045978	14.5051	-1.19191	0.432849	-2.75365	0.00589347	0.0461508	1.33582	chchd6b
ENSDARG00000101543	6.62371	1.50679	0.547218	2.75355	0.00589528	0.0461508	1.33582	-
ENSDARG00000007641	6.34587	1.55117	0.563577	2.75236	0.0059167	0.0462526	1.33486	msx1a
ENSDARG00000034470	169.176	-0.578792	0.210299	-2.75224	0.00591897	0.0462526	1.33486	aldoab
ENSDARG00000044691	50.3605	0.894622	0.325057	2.7522	0.00591963	0.0462526	1.33486	ppp1r3b
ENSDARG00000074306	5.25324	1.67149	0.607372	2.75201	0.00592309	0.0462526	1.33486	wu:fa26c03
ENSDARG00000005774	96.5729	-0.74905	0.272387	-2.74994	0.00596054	0.0465161	1.3324	ddx3b
ENSDARG00000043646	12.5233	-1.3009	0.473107	-2.7497	0.00596507	0.0465223	1.33234	slc6a8
ENSDARG00000003641	39.9331	0.833358	0.303186	2.74867	0.00598381	0.0466394	1.33125	tfg
ENSDARG00000100374	95.5449	-0.558552	0.203258	-2.74799	0.00599617	0.0467066	1.33062	txnrd1
ENSDARG00000071863	13.8789	-1.14727	0.417531	-2.74774	0.00600077	0.0467133	1.33056	itgb1a
ENSDARG00000058105	2058.14	0.273679	0.0996446	2.74656	0.00602247	0.0468531	1.32926	rpl36a
ENSDARG00000058646	21.3599	-1.0004	0.364434	-2.74507	0.00604979	0.0470363	1.32757	ptprna
ENSDARG00000019223	163.58	-0.425593	0.155118	-2.74367	0.00607565	0.0472081	1.32598	arglu1a
ENSDARG00000019702	33.9635	1.02922	0.375349	2.74203	0.00610616	0.0473862	1.32435	aldocb
ENSDARG00000102571	319.032	0.398313	0.14526	2.74206	0.00610552	0.0473862	1.32435	metap2b
ENSDARG00000040087	13.8864	1.14783	0.418651	2.74172	0.0061118	0.0473876	1.32434	epb41l4a
ENSDARG00000053263	13.0745	-1.21006	0.44137	-2.74161	0.00611391	0.0473876	1.32434	zgc:113372
ENSDARG00000099283	69.9525	-0.600014	0.219055	-2.7391	0.00616076	0.0477211	1.32129	-
ENSDARG00000105323	20.9924	1.11723	0.408168	2.73718	0.0061969	0.0479713	1.31902	si:ch1073-456m8.1
ENSDARG00000031664	48.0443	0.756059	0.276356	2.73582	0.00622249	0.0481098	1.31777	sox21a
ENSDARG00000059097	100.412	0.648581	0.237058	2.73595	0.00621995	0.0481098	1.31777	nktr
ENSDARG00000002445	24.9075	0.946254	0.346072	2.73427	0.00625183	0.0482962	1.31609	prdm1a
ENSDARG00000058421	4.01006	-1.65979	0.607059	-2.73414	0.00625433	0.0482962	1.31609	lgi1b
ENSDARG00000078244	9.01369	-1.52688	0.558553	-2.73363	0.00626394	0.0483406	1.31569	si:ch211-197l9.2
ENSDARG00000010276	3.10656	1.76394	0.646	2.73055	0.00632281	0.048737	1.31214	ptgs2b
ENSDARG00000101277	37.8167	-0.80827	0.296011	-2.73054	0.0063231	0.048737	1.31214	znf207b
ENSDARG00000021948	158.888	-0.582109	0.213342	-2.72852	0.00636193	0.0489457	1.31029	tnc
ENSDARG00000025953	5.02947	-1.63835	0.600442	-2.72857	0.00636093	0.0489457	1.31029	rhoq
ENSDARG00000037517	43.6121	0.76982	0.282138	2.72853	0.0063618	0.0489457	1.31029	slc35c2
ENSDARG00000012311	3.50891	-1.70506	0.625109	-2.72762	0.00637936	0.0489705	1.31007	myoz2a
ENSDARG00000026453	46.6378	-0.796564	0.291987	-2.72808	0.00637035	0.0489705	1.31007	zgc:66474
ENSDARG00000031796	10.6073	-1.3521	0.495648	-2.72794	0.00637319	0.0489705	1.31007	ache
ENSDARG00000052082	41.0942	0.790886	0.289963	2.72754	0.00638082	0.0489705	1.31007	gabarapb
ENSDARG00000010400	31.3549	-0.851295	0.312317	-2.72574	0.00641583	0.049209	1.30796	lrrfip2
ENSDARG00000035958	353.009	0.515642	0.189248	2.72469	0.00643614	0.0493043	1.30712	tnni2b.1
ENSDARG00000074121	115.314	-0.545236	0.200095	-2.72488	0.00643242	0.0493043	1.30712	dnmbp
ENSDARG00000045694	39.5958	0.814333	0.298925	2.72421	0.00644562	0.0493467	1.30674	prickle1b
ENSDARG00000036237	36.3876	0.908491	0.333619	2.72314	0.00646642	0.049385	1.30641	slc27a2a
ENSDARG00000042732	40.6586	0.776698	0.285192	2.72343	0.00646087	0.049385	1.30641	tmem189
ENSDARG00000059323	100.69	0.551279	0.202435	2.72324	0.0064646	0.049385	1.30641	rpn1
ENSDARG00000103129	67.9281	0.823096	0.302193	2.72374	0.00645469	0.049385	1.30641	-
ENSDARG00000100011	10.9806	-1.31054	0.481412	-2.72229	0.00648321	0.049483	1.30554	-
ENSDARG00000070108	161.493	-0.478115	0.175682	-2.72148	0.00649907	0.0495738	1.30475	dek
ENSDARG00000017675	38.1216	0.864926	0.317977	2.72009	0.00652635	0.0497234	1.30344	cirh1a
ENSDARG00000024219	26.3576	-0.884117	0.325034	-2.72008	0.00652664	0.0497234	1.30344	zgc:55582
ENSDARG00000001897	27.6503	0.917025	0.337423	2.71773	0.00657314	0.0500471	1.30062	man2b1
ENSDARG00000015224	59.6909	0.670766	0.246873	2.71705	0.00658662	0.0501031	1.30014	cd2ap
ENSDARG00000060298	41.2695	-0.867369	0.319243	-2.71696	0.0065885	0.0501031	1.30014	nin
ENSDARG00000015536	150.808	-0.529187	0.194789	-2.71672	0.00659318	0.0501082	1.30009	sox6
ENSDARG00000005916	24.9465	-1.18427	0.436241	-2.71472	0.00663318	0.0503816	1.29773	srpk3
ENSDARG00000097351	15.1072	1.17117	0.43173	2.71273	0.00667314	0.0506543	1.29538	flnb
ENSDARG00000103950	2.32664	-1.7524	0.646044	-2.71251	0.00667749	0.0506566	1.29536	pcdh1gc6
ENSDARG00000075542	223.343	-0.441276	0.162914	-2.70864	0.00675591	0.0512204	1.29056	zfhx4
ENSDARG00000090834	7.30881	1.48844	0.549819	2.70715	0.00678631	0.0513988	1.28905	epor
ENSDARG00000105018	35.8344	0.77007	0.284464	2.70709	0.00678767	0.0513988	1.28905	lrrc20
ENSDARG00000070012	2.98705	1.74864	0.646044	2.70669	0.00679578	0.0514291	1.28879	sesn2
ENSDARG00000009779	30.0081	0.951354	0.351549	2.70618	0.00680626	0.0514772	1.28839	mcl1a
ENSDARG00000039966	10.9246	1.48917	0.550603	2.70461	0.00683845	0.0516894	1.2866	prom1a
ENSDARG00000007405	29.9352	0.855822	0.316548	2.7036	0.0068592	0.051794	1.28572	strap
ENSDARG00000074979	84.2116	-0.561352	0.207636	-2.70354	0.00686057	0.051794	1.28572	larp4ab
ENSDARG00000074752	15.955	1.08887	0.402928	2.70239	0.00688423	0.0519413	1.28449	hlfa
ENSDARG00000062338	62.5081	-0.71241	0.263644	-2.70217	0.00688881	0.0519445	1.28446	zeb2a
ENSDARG00000102792	2.66657	1.74355	0.645611	2.70061	0.00692119	0.0521572	1.28269	-
ENSDARG00000008153	98.045	0.539939	0.199979	2.69997	0.00693448	0.0522121	1.28223	serinc5
ENSDARG00000040110	92.8154	-0.59888	0.221819	-2.69986	0.00693683	0.0522121	1.28223	kif20bb
ENSDARG00000018846	16.979	1.09379	0.405292	2.69876	0.00695975	0.0523531	1.28106	-
ENSDARG00000056483	63.3537	0.615559	0.228289	2.69641	0.00700922	0.0526935	1.27824	ssbp4
ENSDARG00000062361	83.4139	-0.640044	0.237419	-2.69584	0.0070211	0.0527511	1.27777	zgc:158234
ENSDARG00000078998	3.19142	-1.71698	0.637124	-2.6949	0.00704104	0.0528691	1.2768	lhfpl4a
ENSDARG00000042329	13.8472	1.26584	0.469824	2.69428	0.00705407	0.0529352	1.27626	si:dkey-91m11.5
ENSDARG00000039347	1753.37	0.268889	0.0998206	2.69373	0.00706584	0.0529917	1.27579	rps24
ENSDARG00000016360	11.9308	-1.30909	0.486087	-2.69312	0.00707875	0.0530249	1.27552	kpna1
ENSDARG00000060222	4.94033	-1.59236	0.591257	-2.69317	0.00707766	0.0530249	1.27552	scn1ba
ENSDARG00000014165	84.5341	0.551987	0.205053	2.69192	0.00710413	0.0531831	1.27423	ssr3
ENSDARG00000045352	41.5894	0.857872	0.318769	2.69121	0.00711941	0.0532357	1.2738	cst14a.2
ENSDARG00000090309	55.4041	-0.638052	0.237089	-2.69119	0.00711967	0.0532357	1.2738	ubxn1
ENSDARG00000056027	61.8968	-0.625543	0.232523	-2.69024	0.00714009	0.0533565	1.27281	hoxb8a
ENSDARG00000079687	271.235	-0.373518	0.1389	-2.68911	0.00716428	0.0534733	1.27186	rnf10
ENSDARG00000086098	9.17974	1.39125	0.517329	2.68929	0.00716038	0.0534733	1.27186	LOC566587
ENSDARG00000012458	58.7683	0.629992	0.23441	2.68757	0.0071975	0.0536572	1.27037	zgc:77849
ENSDARG00000012881	36.012	-1.02136	0.380022	-2.68763	0.00719619	0.0536572	1.27037	slc4a1a
ENSDARG00000062359	2.96704	-1.71067	0.636783	-2.68643	0.00722199	0.0538077	1.26916	scn3b
ENSDARG00000019239	96.0884	-0.524001	0.195118	-2.68556	0.00724077	0.0539155	1.26829	cul1a
ENSDARG00000021569	9.9985	1.2908	0.480696	2.68527	0.00724714	0.0539308	1.26816	gdap2
ENSDARG00000062370	28.6091	-0.88584	0.33031	-2.68184	0.00732175	0.0544536	1.26397	bcl2l13
ENSDARG00000100231	3.24862	1.70946	0.637543	2.68133	0.00733307	0.0544916	1.26367	ccdc135
ENSDARG00000103322	21.8954	1.06935	0.39883	2.68121	0.00733558	0.0544916	1.26367	si:ch73-347e22.8
ENSDARG00000036481	11.9644	1.30852	0.488138	2.68063	0.00734832	0.0545084	1.26354	tcn2
ENSDARG00000039512	2.40038	-1.73004	0.645384	-2.68063	0.00734839	0.0545084	1.26354	ap1m3
ENSDARG00000060521	22.4694	-1.08803	0.405905	-2.68051	0.00735092	0.0545084	1.26354	rbm27
ENSDARG00000069261	9.72015	-1.32784	0.495465	-2.67999	0.00736238	0.054561	1.26312	metap2a
ENSDARG00000038686	2.53834	1.72871	0.645621	2.6776	0.00741522	0.0548551	1.26078	si:ch211-134m17.9
ENSDARG00000045141	7.30561	1.54713	0.57775	2.67786	0.00740937	0.0548551	1.26078	aqp8a.1
ENSDARG00000070866	32.6435	0.814771	0.304283	2.67768	0.00741349	0.0548551	1.26078	tmem11
ENSDARG00000078362	4.75502	-1.60288	0.598716	-2.67719	0.00742423	0.0548893	1.26051	zmp:0000000846
ENSDARG00000058984	16.6412	-1.10389	0.412396	-2.67677	0.00743357	0.0549258	1.26022	rad23ab
ENSDARG00000042115	38.6577	-0.818621	0.305901	-2.6761	0.00744838	0.0549703	1.25987	tmem198a
ENSDARG00000078186	34.9724	0.82233	0.30728	2.67616	0.00744715	0.0549703	1.25987	tex2
ENSDARG00000103507	13.5135	1.18211	0.441847	2.67539	0.0074642	0.0550545	1.25921	n4bp2l2
ENSDARG00000023536	130.764	-0.469088	0.175364	-2.67494	0.00747423	0.055083	1.25898	nnt
ENSDARG00000099972	69.8752	-0.625582	0.233878	-2.67482	0.00747687	0.055083	1.25898	nup153
ENSDARG00000087247	8.2668	-1.36139	0.509089	-2.67417	0.00749152	0.0551584	1.25839	kcnab2a
ENSDARG00000094709	19.2594	-0.996384	0.37266	-2.67371	0.00750172	0.055201	1.25805	arl8
ENSDARG00000008732	20.9685	-0.998467	0.373584	-2.67267	0.00752494	0.0553393	1.25697	zgc:66479
ENSDARG00000102546	92.436	-0.544027	0.203654	-2.67133	0.00755506	0.0555282	1.25549	cdk11b
ENSDARG00000045911	15.7904	-1.12802	0.422356	-2.67078	0.00756763	0.0555878	1.25502	tulp4a
ENSDARG00000060434	30.2564	-0.928375	0.347769	-2.66951	0.0075961	0.0557642	1.25364	map1b
ENSDARG00000086957	44.9053	-0.671377	0.251517	-2.66931	0.00760064	0.0557648	1.25364	si:dkeyp-118a3.2
ENSDARG00000019081	11.0247	1.21222	0.454188	2.66898	0.00760825	0.055771	1.25359	zgc:101723
ENSDARG00000052429	17.1607	1.06732	0.399914	2.66888	0.00761041	0.055771	1.25359	syngr2a
ENSDARG00000020136	5.90618	1.54751	0.579879	2.66867	0.00761516	0.0557732	1.25357	ptges
ENSDARG00000016439	2.83083	-1.72317	0.64597	-2.66757	0.0076403	0.0559079	1.25253	slc7a1
ENSDARG00000078887	5.82674	-1.5621	0.585611	-2.66747	0.00764251	0.0559079	1.25253	atp10d
ENSDARG00000020217	20.5296	0.987811	0.370551	2.66579	0.00768076	0.0561549	1.25061	cpsf4
ENSDARG00000077227	39.03	-0.766172	0.287541	-2.66456	0.00770889	0.0563276	1.24928	fbxl6
ENSDARG00000038768	61.919	-0.6613	0.248419	-2.66203	0.00776698	0.0566858	1.24653	mrpl12
ENSDARG00000098380	8.54011	-1.3697	0.5145	-2.66219	0.00776336	0.0566858	1.24653	-
ENSDARG00000034423	32.6268	-0.944716	0.355171	-2.65989	0.00781659	0.056915	1.24477	sncga
ENSDARG00000045131	8.28398	-1.33221	0.500796	-2.66018	0.00780982	0.056915	1.24477	id4
ENSDARG00000045482	5.39259	-1.56869	0.589742	-2.65995	0.00781524	0.056915	1.24477	stk38l
ENSDARG00000061256	29.6228	1.02553	0.385543	2.65995	0.00781518	0.056915	1.24477	si:dkey-44g23.5
ENSDARG00000100170	16.7405	1.07667	0.404924	2.65896	0.0078383	0.0570398	1.24382	pam
ENSDARG00000019566	22.7111	-0.913813	0.343888	-2.6573	0.00787693	0.0572876	1.24194	-
ENSDARG00000013863	210.356	-0.408093	0.153727	-2.65467	0.0079387	0.0576363	1.2393	fam133b
ENSDARG00000052695	97.3764	-0.55676	0.209714	-2.65485	0.00793439	0.0576363	1.2393	nr2f1a
ENSDARG00000070353	5.7828	-1.55568	0.585936	-2.65502	0.00793026	0.0576363	1.2393	hoxc13a
ENSDARG00000088581	9.54595	1.38714	0.52289	2.65283	0.00798207	0.0579175	1.23719	f10
ENSDARG00000038359	7.81042	1.39029	0.524136	2.65254	0.00798879	0.0579326	1.23708	enosf1
ENSDARG00000077934	195.838	0.407811	0.153758	2.6523	0.00799456	0.0579409	1.23701	tegt
ENSDARG00000073731	3.6156	1.65717	0.625361	2.64994	0.00805054	0.0583128	1.23424	dok4
ENSDARG00000028148	57.348	0.679241	0.25654	2.64769	0.00810428	0.058663	1.23164	pax2a
ENSDARG00000067848	17.187	-1.1418	0.431272	-2.64753	0.00810827	0.058663	1.23164	nmrk2
ENSDARG00000031427	101.428	-0.547361	0.206838	-2.64633	0.00813698	0.0588366	1.23035	calm2a
ENSDARG00000055133	379.906	-0.399102	0.150876	-2.64523	0.00816344	0.0589938	1.22919	cenpf
ENSDARG00000062089	23.743	-1.1493	0.434525	-2.64496	0.00816998	0.0590006	1.22914	uggt2
ENSDARG00000087732	7.20016	-1.42807	0.539954	-2.6448	0.00817381	0.0590006	1.22914	-
ENSDARG00000103759	19.6028	1.14347	0.432429	2.64429	0.00818632	0.0590568	1.22873	fahd2a
ENSDARG00000019815	15.1077	1.09832	0.415683	2.6422	0.00823682	0.059386	1.22632	fn1a
ENSDARG00000030265	3.82336	-1.61396	0.610897	-2.64195	0.00824303	0.059386	1.22632	scdb
ENSDARG00000053405	4.46303	1.63503	0.618905	2.64182	0.0082462	0.059386	1.22632	sord
ENSDARG00000029671	31.5027	0.86287	0.326788	2.64046	0.00827944	0.059591	1.22482	xpr1b
ENSDARG00000020811	12.4483	1.20058	0.454732	2.6402	0.00828574	0.059602	1.22474	efemp2b
ENSDARG00000001953	8.54473	1.54148	0.584435	2.63755	0.00835071	0.0596618	1.2243	pfkfb3
ENSDARG00000002026	9.82642	-1.34901	0.51127	-2.63854	0.00832627	0.0596618	1.2243	qkib
ENSDARG00000013414	3.20203	-1.67488	0.634768	-2.63857	0.00832575	0.0596618	1.2243	lin7a
ENSDARG00000013681	23.7767	1.02844	0.389813	2.63828	0.00833267	0.0596618	1.2243	si:dkey-42i9.6
ENSDARG00000014956	7.69124	1.44994	0.549736	2.63753	0.00835132	0.0596618	1.2243	diablob
ENSDARG00000016687	58.8505	-0.60326	0.228713	-2.63763	0.0083487	0.0596618	1.2243	acadvl
ENSDARG00000018025	28.5385	0.932559	0.353472	2.63828	0.00833273	0.0596618	1.2243	tbx2a
ENSDARG00000025875	6.72686	-1.5246	0.578016	-2.63763	0.00834866	0.0596618	1.2243	kctd2
ENSDARG00000059327	10.6064	1.27643	0.483868	2.63798	0.00834025	0.0596618	1.2243	gata2a
ENSDARG00000071465	18.5646	-1.04499	0.396197	-2.63757	0.00835036	0.0596618	1.2243	lrrc39
ENSDARG00000077383	31.055	0.917774	0.347817	2.63867	0.0083232	0.0596618	1.2243	anxa11a
ENSDARG00000103720	7.61267	1.42633	0.540596	2.63845	0.00832867	0.0596618	1.2243	-
ENSDARG00000036080	496.73	0.443218	0.168114	2.63642	0.00837865	0.0598229	1.22313	cd81a
ENSDARG00000042652	96.171	0.64485	0.244646	2.63584	0.00839284	0.0598558	1.22289	rreb1b
ENSDARG00000058949	7.54326	-1.43296	0.543623	-2.63594	0.00839037	0.0598558	1.22289	spin1
ENSDARG00000096849	89.6179	0.576591	0.218773	2.63557	0.00839959	0.0598698	1.22279	-
ENSDARG00000059337	180.977	0.458071	0.173828	2.6352	0.00840882	0.0599015	1.22256	tgif1
ENSDARG00000020133	3.70563	1.65905	0.630202	2.63257	0.00847407	0.0603319	1.21945	jdp2b
ENSDARG00000104571	5.2804	1.55808	0.591903	2.63232	0.00848039	0.0603425	1.21938	gadd45ab
ENSDARG00000076850	6.08245	-1.65053	0.627312	-2.63111	0.00851058	0.0605229	1.21808	si:ch211-157b11.14
ENSDARG00000039343	44.5471	-0.714187	0.271477	-2.63074	0.00851986	0.0605545	1.21785	ahcyl2
ENSDARG00000015990	268.987	-0.383418	0.145849	-2.62888	0.00856678	0.0608533	1.21572	hcfc1a
ENSDARG00000010717	15.8407	-1.06756	0.406143	-2.62852	0.00857566	0.0608818	1.21551	chchd10
ENSDARG00000018491	18.5398	-1.03983	0.395637	-2.62825	0.00858242	0.0608952	1.21542	pdia4
ENSDARG00000001939	36.5371	-0.827491	0.314979	-2.62713	0.00861082	0.0609929	1.21472	b3gat3
ENSDARG00000002609	19.9456	-1.00299	0.381732	-2.62747	0.00860233	0.0609929	1.21472	rnf145a
ENSDARG00000019000	245.408	-0.402191	0.153087	-2.6272	0.00860903	0.0609929	1.21472	smc3
ENSDARG00000056150	39.2498	0.822729	0.31325	2.62643	0.00862861	0.0610843	1.21407	rbms2b
ENSDARG00000019581	81.4132	0.613298	0.233715	2.62413	0.00868709	0.0614635	1.21138	uso1
ENSDARG00000056019	2.99358	-1.68054	0.640606	-2.62336	0.0087067	0.0615326	1.21089	ttbk1a
ENSDARG00000094300	22.8704	0.913035	0.348034	2.62341	0.00870554	0.0615326	1.21089	-
ENSDARG00000055477	27.5331	-0.984912	0.375588	-2.62232	0.00873327	0.0616855	1.20982	pelo
ENSDARG00000020072	12.3345	1.22684	0.467948	2.62174	0.00874829	0.0617567	1.20932	thbs4b
ENSDARG00000103007	1017.74	0.339206	0.129404	2.6213	0.00875961	0.0618017	1.209	rps3
ENSDARG00000017794	4.01832	-1.6066	0.613064	-2.62061	0.00877728	0.0618915	1.20837	sdr16c5b
ENSDARG00000022418	50.1616	-0.752138	0.287044	-2.62029	0.00878549	0.0619039	1.20828	faf1
ENSDARG00000099889	39.0411	0.779363	0.297449	2.62016	0.00878895	0.0619039	1.20828	dusp27
ENSDARG00000035507	13.2388	1.2035	0.459572	2.61875	0.00882531	0.062125	1.20673	ddx31
ENSDARG00000075923	8.27824	-1.31956	0.504022	-2.61806	0.00884323	0.0622161	1.2061	si:ch1073-179p4.3
ENSDARG00000031138	44.6411	0.724325	0.2767	2.61772	0.00885182	0.0622416	1.20592	-
ENSDARG00000105193	3.44965	-1.63299	0.624221	-2.61605	0.00889538	0.0625127	1.20403	-
ENSDARG00000028098	5.66822	-1.53327	0.586334	-2.61501	0.00892254	0.0626683	1.20295	fut9d
ENSDARG00000034836	25.0264	0.928339	0.355206	2.61352	0.00896151	0.0629067	1.2013	si:dkey-222n6.2
ENSDARG00000036592	3.31381	-1.66452	0.637054	-2.61284	0.00897937	0.0629966	1.20068	setd4
ENSDARG00000060729	45.3622	-0.692498	0.265185	-2.61138	0.00901777	0.0632306	1.19907	trim8b
ENSDARG00000076895	58.7299	0.598242	0.229142	2.6108	0.0090332	0.0633033	1.19857	flrt3
ENSDARG00000023963	154.285	0.489123	0.187371	2.61045	0.00904235	0.0633319	1.19838	tpm4a; tpm4b
ENSDARG00000038074	34.12	0.80709	0.309241	2.60991	0.00905662	0.0633963	1.19794	ergic3
ENSDARG00000015385	35.9962	-0.747179	0.286324	-2.60956	0.00906591	0.0634258	1.19773	ndufs3
ENSDARG00000034670	41.1168	-0.764808	0.293122	-2.60918	0.00907592	0.0634333	1.19768	ube2e2
ENSDARG00000034957	13.5198	1.13001	0.433097	2.60914	0.00907713	0.0634333	1.19768	hddc2
ENSDARG00000009493	14.3373	-1.08624	0.416543	-2.60774	0.00911427	0.0636573	1.19615	si:ch211-45c16.2
ENSDARG00000102317	1870.24	0.276227	0.105973	2.60659	0.00914497	0.0638361	1.19493	rpl26
ENSDARG00000099960	4.61905	1.57793	0.605512	2.60595	0.00916203	0.0639195	1.19437	elovl1a
ENSDARG00000001557	16.9624	-1.03267	0.396317	-2.60566	0.00916961	0.0639195	1.19437	tomm34
ENSDARG00000075624	4.33854	-1.54903	0.594508	-2.60557	0.00917226	0.0639195	1.19437	bend5
ENSDARG00000062376	3.21621	-1.63781	0.628695	-2.6051	0.00918484	0.0639715	1.19401	nlgn3b
ENSDARG00000063254	2.1933	-1.68162	0.645879	-2.60361	0.0092248	0.0642141	1.19237	r3hdm4
ENSDARG00000005629	31.6219	-0.813432	0.312448	-2.60342	0.00922998	0.0642144	1.19237	smyd2b
ENSDARG00000077839	8.03687	-1.3101	0.503538	-2.60179	0.00927373	0.0644829	1.19056	dhx30
ENSDARG00000008867	125.135	-0.467535	0.179775	-2.60067	0.00930429	0.0646446	1.18947	rap1b
ENSDARG00000045940	170.817	0.410572	0.157879	2.60055	0.00930734	0.0646446	1.18947	lsm12b
ENSDARG00000003866	48.0577	-0.657458	0.252942	-2.59925	0.0093429	0.0648338	1.1882	tm9sf2
ENSDARG00000062323	6.03928	-1.44969	0.55779	-2.59898	0.00935013	0.0648338	1.1882	adam23a
ENSDARG00000087303	4.36483	1.61215	0.620263	2.59914	0.00934569	0.0648338	1.1882	cebpd
ENSDARG00000062868	20.4192	-0.997318	0.383801	-2.59853	0.00936243	0.0648831	1.18787	-
ENSDARG00000069113	40.6169	-0.753947	0.290181	-2.59819	0.00937156	0.0649104	1.18769	dbn1
ENSDARG00000010018	49.649	0.658445	0.253522	2.5972	0.00939884	0.0649218	1.18761	qki2
ENSDARG00000045463	13.3444	-1.22439	0.471462	-2.59699	0.00940436	0.0649218	1.18761	ralaa
ENSDARG00000063100	49.6901	-0.806939	0.310661	-2.59749	0.00939078	0.0649218	1.18761	psmd14
ENSDARG00000078856	9.0457	1.31602	0.506564	2.59794	0.00937856	0.0649218	1.18761	slc22a23
ENSDARG00000086699	37.0275	-0.737192	0.283856	-2.59706	0.00940244	0.0649218	1.18761	smim15
ENSDARG00000101637	657.692	0.353329	0.136036	2.59731	0.0093957	0.0649218	1.18761	ccnd1
ENSDARG00000007136	5.12326	-1.5119	0.582326	-2.59631	0.00942308	0.0649471	1.18744	sh3bp5lb
ENSDARG00000039322	5.62534	1.51493	0.583499	2.59629	0.00942362	0.0649471	1.18744	LOC402879
ENSDARG00000081443	7.36728	-1.40541	0.541269	-2.59651	0.00941749	0.0649471	1.18744	-
ENSDARG00000038667	8.45321	1.36858	0.52719	2.59598	0.00943202	0.0649692	1.18729	-
ENSDARG00000056499	16.8245	-1.00775	0.388301	-2.59528	0.00945135	0.0650665	1.18664	ca6
ENSDARG00000100990	38.2741	0.710377	0.273999	2.59262	0.00952474	0.0655357	1.18352	nme3
ENSDARG00000025403	36.4195	0.749676	0.289366	2.59076	0.00957656	0.0658559	1.18141	ftr83
ENSDARG00000102624	27.2936	-0.869413	0.33564	-2.59031	0.00958885	0.0659042	1.18109	kif22
ENSDARG00000018105	4.74734	-1.55461	0.60036	-2.58946	0.00961272	0.066032	1.18025	casq1b
ENSDARG00000077300	32.2322	-0.885577	0.342045	-2.58907	0.00962354	0.06607	1.18	usp42
ENSDARG00000008662	8.64913	1.31595	0.508501	2.58789	0.00965655	0.0662239	1.17899	fign
ENSDARG00000040072	12.9612	1.22781	0.474439	2.58793	0.00965552	0.0662239	1.17899	scpep1
ENSDARG00000030765	25.8776	-0.844289	0.32631	-2.58739	0.00967071	0.0662483	1.17882	hadh
ENSDARG00000058656	175.462	-0.533102	0.206034	-2.58745	0.00966887	0.0662483	1.17882	desma
ENSDARG00000057075	20.7266	0.986454	0.38134	2.58681	0.00968688	0.0663228	1.17834	lamtor3
ENSDARG00000074526	128.51	0.520428	0.201305	2.58527	0.00973034	0.0665839	1.17663	zbtb16b
ENSDARG00000017180	18.2399	1.04882	0.406018	2.58319	0.00978917	0.0669244	1.17442	npc1
ENSDARG00000043571	63.445	0.61323	0.237406	2.58304	0.00979334	0.0669244	1.17442	zgc:103670
ENSDARG00000103824	107.192	-0.549444	0.21272	-2.58294	0.00979616	0.0669244	1.17442	hint1
ENSDARG00000091481	11.5354	1.24828	0.483517	2.58166	0.00983258	0.0671365	1.17304	foxc1a
ENSDARG00000006010	32.4796	0.789412	0.305961	2.58011	0.00987694	0.0674026	1.17132	bmi1a
ENSDARG00000035175	83.441	0.633531	0.245682	2.57867	0.00991818	0.0676471	1.16975	schip1
ENSDARG00000014273	10.3931	-1.23808	0.480215	-2.57819	0.00993197	0.0677042	1.16938	camk2d2
ENSDARG00000015540	9.15751	1.36623	0.530046	2.57757	0.00994965	0.0677214	1.16927	psen2
ENSDARG00000019195	24.8378	0.895605	0.347465	2.57754	0.00995075	0.0677214	1.16927	vps9d1
ENSDARG00000086856	15.6395	1.36044	0.527786	2.57764	0.0099477	0.0677214	1.16927	stk35
ENSDARG00000033320	9.85306	-1.27252	0.493898	-2.57649	0.00998081	0.0678153	1.16867	sar1ab
ENSDARG00000062363	12.6593	-1.15434	0.448021	-2.57653	0.00997978	0.0678153	1.16867	phex
ENSDARG00000079229	6.44797	1.54991	0.601474	2.57685	0.00997052	0.0678153	1.16867	znf414
ENSDARG00000005359	19.8184	-1.00919	0.391993	-2.57452	0.0100379	0.0680921	1.1669	sucla2
ENSDARG00000103231	25.0045	-0.917509	0.356354	-2.57472	0.0100322	0.0680921	1.1669	-
ENSDARG00000103893	62.1354	-0.611555	0.237524	-2.57471	0.0100325	0.0680921	1.1669	srsf2b
ENSDARG00000038099	59.1921	0.626342	0.243342	2.57392	0.0100554	0.0681742	1.16638	gskip
ENSDARG00000063684	11.388	1.23103	0.478439	2.57301	0.0100818	0.0683161	1.16548	ppm1h
ENSDARG00000032637	42.92	-0.764665	0.29723	-2.57264	0.0100926	0.068352	1.16525	si:dkey-261m9.12
ENSDARG00000061544	2.39985	-1.66159	0.646029	-2.57201	0.010111	0.0684394	1.16469	ano6
ENSDARG00000063563	42.6585	0.811132	0.315414	2.57165	0.0101217	0.0684745	1.16447	-
ENSDARG00000099705	2.72326	-1.65488	0.643786	-2.57055	0.0101537	0.0686539	1.16333	foxred1
ENSDARG00000103917	74.9149	0.678209	0.263901	2.56994	0.0101717	0.0687386	1.1628	-
ENSDARG00000098820	4.72703	1.55771	0.606583	2.56801	0.0102283	0.069084	1.16062	ftr67
ENSDARG00000011672	49.6139	0.676137	0.263382	2.56714	0.0102542	0.0692217	1.15976	sema3b
ENSDARG00000037852	3.08456	1.64191	0.640004	2.56547	0.0103037	0.0695177	1.1579	zgc:101663
ENSDARG00000057184	2.60656	-1.65579	0.645479	-2.56521	0.0103115	0.0695251	1.15786	zgc:55781
ENSDARG00000057672	13.8966	1.08484	0.42299	2.56468	0.010327	0.0695251	1.15786	plpp5
ENSDARG00000087854	26.3293	-0.992561	0.387006	-2.56472	0.010326	0.0695251	1.15786	si:dkey-108k21.13; zgc:112234
ENSDARG00000103787	99.6231	-0.493044	0.192224	-2.56494	0.0103193	0.0695251	1.15786	chd1
ENSDARG00000020541	19.8329	0.987333	0.38507	2.56403	0.0103464	0.069618	1.15728	ism1
ENSDARG00000044874	102.517	0.600962	0.234405	2.56378	0.0103539	0.0696313	1.1572	zgc:92107
ENSDARG00000046002	16.8812	0.990547	0.386668	2.56175	0.0104146	0.0700017	1.15489	necap2
ENSDARG00000099774	18.3494	-1.02362	0.399663	-2.56122	0.0104305	0.070071	1.15446	cyb5b
ENSDARG00000036816	30.5897	-0.758087	0.296048	-2.56069	0.0104464	0.07014	1.15403	LOC100537384
ENSDARG00000004525	45.7289	0.700212	0.273534	2.55987	0.0104712	0.0702688	1.15324	zgc:63882
ENSDARG00000005525	20.4892	0.985141	0.385006	2.55877	0.0105045	0.0703788	1.15256	acy3.2
ENSDARG00000006773	30.2869	-0.842429	0.329201	-2.55901	0.010497	0.0703788	1.15256	elovl4a
ENSDARG00000031044	11.6383	-1.27214	0.497161	-2.55881	0.0105031	0.0703788	1.15256	lipg
ENSDARG00000005834	5.41827	-1.54839	0.605308	-2.55802	0.0105271	0.0704928	1.15186	gatad2b
ENSDARG00000006865	4.43667	-1.58116	0.618219	-2.5576	0.0105398	0.0705398	1.15157	glra4a
ENSDARG00000013655	47.8036	0.77714	0.303918	2.55707	0.0105558	0.0706094	1.15114	tpd52l2b
ENSDARG00000077256	136.234	-0.469594	0.183681	-2.55657	0.0105711	0.0706737	1.15074	nat8l
ENSDARG00000040284	9.75252	1.35316	0.529491	2.55558	0.010601	0.070829	1.14979	si:dkey-79d12.5
ENSDARG00000102565	20.3092	-0.996385	0.389909	-2.55543	0.0106057	0.070829	1.14979	vasnb
ENSDARG00000043663	23.9605	0.863524	0.338049	2.55443	0.0106361	0.0709945	1.14878	faub
ENSDARG00000058419	179.756	0.407802	0.159716	2.55329	0.0106711	0.0711899	1.14758	gcn1
ENSDARG00000101561	49.2363	-0.637598	0.249786	-2.55258	0.0106929	0.0712975	1.14693	dbt
ENSDARG00000003293	13.9746	1.06977	0.419157	2.55219	0.0107047	0.071338	1.14668	sox9a
ENSDARG00000055504	22.2749	1.04265	0.408567	2.55196	0.0107118	0.0713477	1.14662	si:ch211-212k18.7
ENSDARG00000054856	3.8815	1.61507	0.633275	2.55035	0.0107616	0.0715364	1.14547	zgc:113305
ENSDARG00000067717	24.1856	0.903314	0.354165	2.55055	0.0107554	0.0715364	1.14547	tomm7
ENSDARG00000070187	95.8168	-0.498352	0.195396	-2.55047	0.0107577	0.0715364	1.14547	dyrk1b
ENSDARG00000098890	19.155	1.09507	0.429391	2.5503	0.0107631	0.0715364	1.14547	cyp2aa9
ENSDARG00000097902	13.9164	1.13087	0.443512	2.54981	0.0107781	0.0715982	1.1451	si:ch73-204p21.2
ENSDARG00000004154	10.7225	-1.15417	0.452901	-2.5484	0.0108218	0.0718504	1.14357	orai1b
ENSDARG00000039269	5.39793	1.54321	0.605615	2.54817	0.010829	0.0718601	1.14351	arg2
ENSDARG00000043493	83.7938	-0.559143	0.219483	-2.54755	0.0108482	0.0719492	1.14297	cltca
ENSDARG00000011821	15.5499	1.24619	0.489382	2.54645	0.0108824	0.0721379	1.14184	plod2
ENSDARG00000041991	40.787	0.708232	0.278418	2.54377	0.0109664	0.0726125	1.13899	rrp9
ENSDARG00000077404	52.3477	0.683135	0.268535	2.54393	0.0109612	0.0726125	1.13899	ncoa3
ENSDARG00000100003	168.491	0.57655	0.226666	2.54361	0.0109714	0.0726125	1.13899	glulb
ENSDARG00000103479	27.3065	0.830944	0.326711	2.54336	0.0109792	0.0726257	1.13891	ptprfa
ENSDARG00000019713	12.3319	1.16084	0.456509	2.54286	0.0109948	0.0726903	1.13852	-
ENSDARG00000035918	5.20823	-1.51161	0.59457	-2.54237	0.0110104	0.072755	1.13814	bzw2
ENSDARG00000069065	27.1478	0.995268	0.391591	2.5416	0.0110347	0.0728766	1.13741	btg3
ENSDARG00000093193	25.0569	0.908233	0.357385	2.54133	0.0110432	0.0728942	1.13731	chia.6; chia.5
ENSDARG00000035324	152.409	-0.531947	0.209435	-2.53991	0.011088	0.0731513	1.13578	hnrpl
ENSDARG00000091678	18.4166	-1.03008	0.406034	-2.53692	0.0111832	0.0737409	1.13229	ints12
ENSDARG00000082979	16.0217	-1.12895	0.445041	-2.53674	0.0111891	0.073741	1.13229	-
ENSDARG00000045885	72.5787	0.581946	0.229469	2.53605	0.0112109	0.0738456	1.13168	scaf11
ENSDARG00000074451	5.88786	1.42869	0.563568	2.53508	0.0112421	0.074012	1.1307	mnd1
ENSDARG00000033376	7.33794	-1.42501	0.56256	-2.53308	0.0113066	0.0743972	1.12844	chchd4a
ENSDARG00000077361	197.348	-0.393221	0.155318	-2.53172	0.0113504	0.0746463	1.12699	bptf
ENSDARG00000005315	90.9938	-0.502756	0.198877	-2.52798	0.011472	0.0754067	1.12259	celf1
ENSDARG00000033596	22.1213	-0.960855	0.380201	-2.52723	0.0114965	0.075528	1.12189	polr2c
ENSDARG00000039133	21.3297	-1.06815	0.422686	-2.52704	0.0115027	0.0755287	1.12189	lamb4
ENSDARG00000087525	10.8326	1.33189	0.527187	2.5264	0.0115237	0.0756268	1.12132	LOC564731
ENSDARG00000032651	93.5326	-0.562233	0.222578	-2.52601	0.0115366	0.0756719	1.12107	ppp1r10
ENSDARG00000104451	32.7907	-0.849377	0.336376	-2.52508	0.0115672	0.0758326	1.12014	slc39a7
ENSDARG00000008637	15.2161	1.04725	0.414888	2.52419	0.0115967	0.0759862	1.11927	mtp
ENSDARG00000102047	23.8628	-0.858383	0.340224	-2.52299	0.0116361	0.0762048	1.11802	mab21l1
ENSDARG00000029290	7.65799	1.39297	0.552659	2.52049	0.0117193	0.0767092	1.11515	stx11b.1
ENSDARG00000011312	16.151	-1.03633	0.411216	-2.52016	0.0117302	0.0767404	1.11498	stk3
ENSDARG00000077009	25.4959	1.03198	0.409662	2.51909	0.0117659	0.0769337	1.11388	wdfy4
ENSDARG00000039150	38.2107	0.772796	0.306962	2.51756	0.0118171	0.0772278	1.11223	lgmn
ENSDARG00000071395	105.955	0.483326	0.192042	2.51677	0.0118437	0.0773616	1.11147	camk2g1
ENSDARG00000062385	6.75748	1.39612	0.554918	2.5159	0.011873	0.0775125	1.11063	flcn
ENSDARG00000069066	30.9426	-0.768138	0.305385	-2.51531	0.0118927	0.0776008	1.11013	nufip2
ENSDARG00000036510	87.6107	0.507727	0.201964	2.51395	0.0119387	0.0778601	1.10868	ccnt2b
ENSDARG00000056713	15.4951	-1.10983	0.441888	-2.51157	0.0120195	0.0783464	1.10598	pskh1
ENSDARG00000093007	34.7332	-0.758008	0.301867	-2.51107	0.0120367	0.0784171	1.10559	mphosph6
ENSDARG00000054696	125.504	-0.528577	0.210523	-2.51079	0.0120463	0.0784387	1.10547	psmb4
ENSDARG00000037177	143.567	-0.444347	0.177004	-2.51037	0.0120603	0.0784894	1.10519	zc3h13
ENSDARG00000103404	31.9346	-0.798563	0.318213	-2.50952	0.0120894	0.0786379	1.10437	uchl5
ENSDARG00000039989	10.3845	-1.2131	0.484046	-2.50618	0.0122044	0.0793448	1.10048	snrnp48
ENSDARG00000095152	3.87872	-1.57917	0.630214	-2.50577	0.0122186	0.0793956	1.1002	-
ENSDARG00000029841	7.19968	1.34426	0.536567	2.5053	0.0122349	0.0794602	1.09985	-
ENSDARG00000058371	728.658	0.339391	0.13548	2.50511	0.0122414	0.079461	1.09985	krt5
ENSDARG00000019137	145.425	0.440129	0.175724	2.50466	0.012257	0.0795043	1.09961	tram1
ENSDARG00000056464	16.9185	-1.03811	0.414493	-2.50452	0.0122617	0.0795043	1.09961	fitm1
ENSDARG00000091655	29.7487	-0.814198	0.325112	-2.50437	0.0122671	0.0795043	1.09961	gcsha
ENSDARG00000004318	5.79991	-1.42862	0.570529	-2.50403	0.0122789	0.079539	1.09942	cbwd
ENSDARG00000033234	47.2974	-0.750377	0.299747	-2.50337	0.0123017	0.0796454	1.09884	stmn2a
ENSDARG00000052170	26.6845	0.840209	0.335687	2.50296	0.0123161	0.0796974	1.09856	uap1
ENSDARG00000028816	11.7737	1.1763	0.470218	2.50159	0.0123635	0.0799633	1.09711	tmed3
ENSDARG00000056023	65.2788	0.630494	0.252139	2.50058	0.0123989	0.0801503	1.09609	hoxb9a
ENSDARG00000003693	84.7129	0.698011	0.279232	2.49975	0.0124281	0.0802254	1.09569	hars
ENSDARG00000012519	123.872	-0.469917	0.188003	-2.49952	0.0124361	0.0802254	1.09569	hcfc1b
ENSDARG00000036279	81.3294	0.568885	0.227559	2.49995	0.0124211	0.0802254	1.09569	lamc1
ENSDARG00000061081	12.0994	-1.08689	0.43484	-2.49952	0.0124362	0.0802254	1.09569	arpp21
ENSDARG00000092798	250.731	0.429574	0.171978	2.49784	0.0124953	0.0805656	1.09385	ppib
ENSDARG00000013346	49.3126	-0.643378	0.25761	-2.49749	0.0125075	0.0806026	1.09365	fam208ab
ENSDARG00000019008	31.4378	0.748166	0.299603	2.4972	0.012518	0.0806286	1.09351	erp44
ENSDARG00000017230	48.2803	-0.728798	0.291918	-2.49658	0.0125397	0.0807266	1.09298	fbxw11b
ENSDARG00000004843	14.9858	1.04837	0.420267	2.49454	0.0126121	0.0811512	1.0907	foxp1a
ENSDARG00000059653	13.1538	-1.09369	0.43853	-2.494	0.0126313	0.081233	1.09027	kdm2aa
ENSDARG00000011932	62.0576	-0.658811	0.264181	-2.49379	0.0126389	0.0812398	1.09023	prkcbp1l
ENSDARG00000037618	16.3179	1.27595	0.511946	2.49236	0.0126898	0.0814891	1.0889	ddit4
ENSDARG00000100789	33.4088	0.803505	0.322391	2.49233	0.0126907	0.0814891	1.0889	plgrkt
ENSDARG00000014770	54.92	-0.639264	0.256527	-2.492	0.0127027	0.0815086	1.0888	usp4
ENSDARG00000086216	20.8898	0.970746	0.389563	2.49188	0.0127068	0.0815086	1.0888	prr13
ENSDARG00000002377	12.4329	1.2041	0.483312	2.49134	0.0127261	0.0815905	1.08836	-
ENSDARG00000074899	69.4788	-0.543136	0.218074	-2.49061	0.0127524	0.0817175	1.08769	taok2a
ENSDARG00000041887	60.7551	-0.604307	0.242669	-2.49025	0.0127652	0.0817576	1.08747	sf3a1
ENSDARG00000031562	15.2815	1.00951	0.405623	2.48879	0.0128179	0.081927	1.08657	tada2a
ENSDARG00000069402	8.91833	-1.27611	0.512696	-2.48902	0.0128095	0.081927	1.08657	lrrc4.1
ENSDARG00000079524	2.28424	1.60789	0.646043	2.48883	0.0128165	0.081927	1.08657	si:ch211-168h21.3
ENSDARG00000095743	148.955	-0.507625	0.203933	-2.48917	0.0128041	0.081927	1.08657	sox11b
ENSDARG00000103744	18.1879	-0.984998	0.395926	-2.48783	0.0128525	0.082106	1.08563	hacd1
ENSDARG00000069433	8.86425	1.26969	0.51055	2.48691	0.0128857	0.0822555	1.08483	tnk1
ENSDARG00000070950	3.32824	1.56193	0.628081	2.48682	0.012889	0.0822555	1.08483	-
ENSDARG00000036549	57.3551	-0.586243	0.235831	-2.48586	0.0129237	0.0824208	1.08396	agpat3
ENSDARG00000054616	110.661	0.52271	0.210283	2.48574	0.0129281	0.0824208	1.08396	-
ENSDARG00000014047	10.1021	1.26895	0.510696	2.48474	0.0129647	0.0825384	1.08334	cldn7b
ENSDARG00000015731	3.0033	-1.59682	0.642644	-2.48477	0.0129636	0.0825384	1.08334	ano5a
ENSDARG00000036629	2160.98	0.25208	0.101465	2.4844	0.012977	0.0825384	1.08334	rps14
ENSDARG00000053479	9.93556	1.20339	0.484348	2.48457	0.0129709	0.0825384	1.08334	gdf6a
ENSDARG00000104014	25.0425	0.887348	0.357178	2.48433	0.0129796	0.0825384	1.08334	-
ENSDARG00000055381	22.6315	0.869188	0.349916	2.48399	0.0129919	0.0825752	1.08315	bambia
ENSDARG00000031770	80.44	0.552308	0.222432	2.48304	0.0130267	0.0827538	1.08221	kat7b
ENSDARG00000095896	185.132	-0.460382	0.185445	-2.48258	0.0130435	0.0828186	1.08187	pou3f3b
ENSDARG00000071347	2.22943	-1.59802	0.643816	-2.48211	0.0130608	0.0828866	1.08152	aftphb
ENSDARG00000061370	24.2683	0.91009	0.366726	2.48166	0.0130772	0.0829481	1.08119	tsen34
ENSDARG00000076833	57.946	-0.681398	0.274673	-2.48076	0.0131101	0.0831149	1.08032	atp1b1b
ENSDARG00000099375	15.4918	1.04076	0.419586	2.48045	0.0131218	0.083147	1.08015	poldip3
ENSDARG00000021794	36.7532	-0.769316	0.310249	-2.47967	0.0131503	0.0832354	1.07969	hmmr
ENSDARG00000056695	18.5998	1.13741	0.45871	2.47958	0.0131539	0.0832354	1.07969	phc2a
ENSDARG00000073799	2.92555	1.59062	0.641504	2.47952	0.0131558	0.0832354	1.07969	zgc:194210
ENSDARG00000063299	13.4572	-1.13437	0.457678	-2.47854	0.0131923	0.0834243	1.07871	pcloa
ENSDARG00000097546	2.79158	1.58517	0.639642	2.47822	0.0132041	0.0834569	1.07854	-
ENSDARG00000092310	17.9878	0.949864	0.383445	2.47719	0.0132422	0.0836556	1.07751	si:ch211-199g17.2
ENSDARG00000021143	14.0861	-1.01343	0.409261	-2.47624	0.0132776	0.0838366	1.07657	rtn1b
ENSDARG00000093304	17.3253	1.00731	0.406907	2.47553	0.013304	0.0839185	1.07614	-
ENSDARG00000102591	9.19857	1.23087	0.497206	2.47557	0.0133023	0.0839185	1.07614	btr30
ENSDARG00000025309	7.27009	-1.31637	0.53181	-2.47527	0.0133135	0.0839362	1.07605	dpf3
ENSDARG00000035872	9.36498	-1.2623	0.510124	-2.47451	0.0133421	0.0840739	1.07534	hsd17b12b
ENSDARG00000071714	9.39284	1.29761	0.524472	2.47413	0.013356	0.0841189	1.07511	znf983
ENSDARG00000044491	16.4852	-1.00772	0.407426	-2.47339	0.0133839	0.0842098	1.07464	kif20a
ENSDARG00000102154	5.69933	1.39923	0.565697	2.47345	0.0133815	0.0842098	1.07464	si:dkey-262g12.10
ENSDARG00000104105	34.0145	-0.866876	0.350532	-2.47303	0.0133972	0.0842514	1.07442	ttf2
ENSDARG00000039345	17.8875	-1.07336	0.434119	-2.4725	0.0134172	0.08432	1.07407	drg1
ENSDARG00000076435	5.86699	1.42143	0.57497	2.47217	0.0134294	0.08432	1.07407	abhd10a
ENSDARG00000090585	7.96007	-1.29923	0.525573	-2.47202	0.0134351	0.08432	1.07407	gpc1b
ENSDARG00000105384	12.012	-1.12646	0.455643	-2.47224	0.013427	0.08432	1.07407	si:dkey-23a13.22
ENSDARG00000056078	11.0191	1.14196	0.462282	2.47027	0.013501	0.0846503	1.07237	rftn2
ENSDARG00000074747	58.4348	-0.601498	0.243495	-2.47027	0.0135012	0.0846503	1.07237	brwd1
ENSDARG00000062956	4.1549	-1.47636	0.598266	-2.46773	0.0135972	0.0852089	1.06952	dagla
ENSDARG00000101858	39.9461	-0.76162	0.308693	-2.46724	0.0136158	0.0852829	1.06914	-
ENSDARG00000094753	4.10197	-1.49366	0.605498	-2.46683	0.0136315	0.0853386	1.06885	si:dkey-71d15.2
ENSDARG00000003411	11.7745	1.15791	0.469522	2.46615	0.0136575	0.0854585	1.06824	foxa2
ENSDARG00000030092	12.8462	1.12093	0.45457	2.46591	0.0136668	0.0854736	1.06817	tram2
[truncated: 29,702 more rows]
[truncated: 1 more columns]

## Sheet: Table S3-0.078 uM DMP
	baseMean	log2FoldChange	lfcSE	stat	pvalue	padj	"=-LOG10" Padj	Gene Symbol
ENSDARG00000079376	275.339	3.81067	0.213236	17.8706	1.9971e-71	1.97912e-67	66.7035	zgc:174153
ENSDARG00000059227	684.018	3.41833	0.192633	17.7453	1.87412e-70	9.28626e-67	66.0322	fabp1b.1
ENSDARG00000095863	827.399	3.4762	0.20121	17.2764	7.07822e-67	2.33817e-63	62.6311	afp4
ENSDARG00000100833	245.053	3.15686	0.192656	16.386	2.40808e-60	5.96601e-57	56.2243	LOC100536033
ENSDARG00000041490	790.873	3.39002	0.209588	16.1747	7.60695e-59	1.5077e-55	54.8217	LOC568656
ENSDARG00000012076	1086.91	2.98444	0.199076	14.9915	8.34552e-51	1.3784e-47	46.8606	apoa1a
ENSDARG00000094559	120.008	3.5003	0.263291	13.2944	2.49397e-40	3.53075e-37	36.4521	zgc:174855
ENSDARG00000101334	153.115	3.12104	0.238812	13.069	4.95117e-39	6.13326e-36	35.2123	ctsc
ENSDARG00000015866	657.05	2.3817	0.185137	12.8645	7.12891e-38	7.84972e-35	34.1051	apoa2
ENSDARG00000058358	753.014	1.71937	0.149524	11.499	1.33515e-30	1.32314e-27	26.8784	krt8
ENSDARG00000013968	496.241	2.36609	0.210472	11.2419	2.53973e-29	2.0974e-26	25.6783	psap
ENSDARG00000068478	171.788	2.45392	0.218241	11.2441	2.47646e-29	2.0974e-26	25.6783	gpx4a
ENSDARG00000053684	498.793	2.19741	0.196855	11.1626	6.21815e-29	4.74014e-26	25.3242	aldob
ENSDARG00000006019	223.474	1.97388	0.183952	10.7304	7.32389e-27	5.18427e-24	23.2853	tktb
ENSDARG00000016771	606.054	2.1205	0.206751	10.2563	1.10834e-24	7.32242e-22	21.1353	-
ENSDARG00000090850	149.135	2.36609	0.231876	10.2041	1.90071e-24	1.17725e-21	20.9291	serpina1l
ENSDARG00000033539	130.669	2.10934	0.211291	9.98314	1.80663e-23	9.94649e-21	20.0023	paics
ENSDARG00000089750	94.0418	2.3185	0.232175	9.986	1.75523e-23	9.94649e-21	20.0023	si:dkey-26g8.5
ENSDARG00000019122	1120.26	1.85282	0.185784	9.97297	2.00153e-23	1.04396e-20	19.9813	he1b
ENSDARG00000039173	269.257	2.23267	0.229793	9.71604	2.5761e-22	1.27646e-19	18.894	ctslb
ENSDARG00000013430	904.667	1.90653	0.197013	9.6772	3.76895e-22	1.77859e-19	18.7499	bhmt
ENSDARG00000013623	444.839	1.63001	0.170549	9.55743	1.20722e-21	5.43799e-19	18.2646	vdac2
ENSDARG00000023656	710.289	1.95656	0.210352	9.30136	1.38664e-20	5.97459e-18	17.2237	he1a
ENSDARG00000103791	474.942	1.45385	0.159975	9.08798	1.00895e-19	4.16614e-17	16.3803	nme2b.1
ENSDARG00000007795	182.57	2.33223	0.258073	9.03708	1.60913e-19	6.37857e-17	16.1953	cst3
ENSDARG00000078941	33.6758	-3.11753	0.348172	-8.95402	3.42781e-19	1.30652e-16	15.8839	zgc:112234; ano9a
ENSDARG00000092807	5872.61	1.32065	0.150472	8.77672	1.68312e-18	5.75374e-16	15.24	-
ENSDARG00000093022	185.513	1.6597	0.189103	8.77668	1.68374e-18	5.75374e-16	15.24	seph
ENSDARG00000102632	311.668	1.52487	0.17365	8.7813	1.61599e-18	5.75374e-16	15.24	ubc
ENSDARG00000079009	149.352	1.78245	0.21106	8.44522	3.0348e-17	1.0025e-14	13.9989	abca1b
ENSDARG00000020574	2413.98	-1.09134	0.130249	-8.3789	5.3423e-17	1.70781e-14	13.7676	atp2a1
ENSDARG00000011405	1694.07	1.65742	0.198332	8.35684	6.44224e-17	1.99508e-14	13.7	rps9
ENSDARG00000040295	803.185	1.36418	0.163695	8.33365	7.8386e-17	2.35396e-14	13.6282	apoeb
ENSDARG00000019763	47.1488	2.94332	0.354201	8.30974	9.59088e-17	2.79546e-14	13.5535	acp5a
ENSDARG00000035602	75.4038	2.46501	0.298621	8.25464	1.52362e-16	4.31401e-14	13.3651	dao.1
ENSDARG00000036237	82.7071	2.2033	0.268009	8.22099	2.01833e-16	5.55601e-14	13.2552	slc27a2a
ENSDARG00000000563	2806.88	-1.34266	0.165011	-8.13679	4.05888e-16	1.08712e-13	12.9637	-
ENSDARG00000053457	1247.23	1.29693	0.159633	8.12443	4.49484e-16	1.17221e-13	12.931	rpl23
ENSDARG00000028213	3306.72	-1.2249	0.153771	-7.96571	1.64282e-15	4.17444e-13	12.3794	-
ENSDARG00000006427	138.519	2.05638	0.258978	7.94038	2.01568e-15	4.99385e-13	12.3016	fabp2
ENSDARG00000075527	40.9394	2.65052	0.336463	7.87762	3.33681e-15	7.87328e-13	12.1038	si:dkey-269i1.3
ENSDARG00000102241	55.7901	2.38621	0.302894	7.87802	3.3262e-15	7.87328e-13	12.1038	zgc:136410
ENSDARG00000089039	65.2882	-1.96633	0.249761	-7.87284	3.46672e-15	7.98959e-13	12.0975	zgc:173585
ENSDARG00000089806	85.0622	1.97854	0.253023	7.81959	5.29971e-15	1.19364e-12	11.9231	si:dkey-239j18.3
ENSDARG00000016598	96.8322	2.15558	0.280902	7.67381	1.66966e-14	3.67696e-12	11.4345	ckmt1
ENSDARG00000055514	260.871	1.63854	0.213682	7.66815	1.745e-14	3.75933e-12	11.4249	icn2
ENSDARG00000101324	556.993	1.72357	0.225063	7.65816	1.88618e-14	3.97703e-12	11.4004	apoa1b
ENSDARG00000090286	29.9372	3.09269	0.405075	7.63485	2.26078e-14	4.66758e-12	11.3309	serpina1
ENSDARG00000058597	99.9458	1.79144	0.237557	7.54108	4.66104e-14	9.42672e-12	11.0256	nt5c3a
ENSDARG00000036834	493.919	1.63835	0.218466	7.49935	6.41372e-14	1.2712e-11	10.8958	cki; krt92
ENSDARG00000036044	1809.7	1.36125	0.182591	7.45517	8.97487e-14	1.74394e-11	10.7585	-
ENSDARG00000100697	81.748	2.57847	0.347642	7.41704	1.19771e-13	2.28256e-11	10.6416	-
ENSDARG00000039185	149.397	1.56451	0.212465	7.36359	1.79029e-13	3.34751e-11	10.4753	nfyba
ENSDARG00000045980	274.057	1.23571	0.169599	7.28607	3.19136e-13	5.85673e-11	10.2323	cst14b.1
ENSDARG00000008494	79.6371	1.83439	0.252071	7.2773	3.4057e-13	6.13645e-11	10.2121	myl6
ENSDARG00000036239	173.204	1.78304	0.248283	7.18151	6.89481e-13	1.22014e-10	9.91359	gatm
ENSDARG00000015325	154.723	1.21191	0.170251	7.11837	1.09208e-12	1.89869e-10	9.72155	u2af1
ENSDARG00000015662	92.4965	1.59805	0.226141	7.06658	1.58802e-12	2.71333e-10	9.5665	pla2g12b
ENSDARG00000023160	95.3991	1.60596	0.235941	6.80659	9.99424e-12	1.67869e-09	8.77503	snrnp40
ENSDARG00000105177	570.233	-0.99523	0.146792	-6.77985	1.20303e-11	1.987e-09	8.7018	ilf3b
ENSDARG00000092155	64.5833	1.64072	0.243147	6.74785	1.5005e-11	2.43769e-09	8.61302	apoc2
ENSDARG00000034203	85.3664	-1.73031	0.258725	-6.68783	2.26501e-11	3.62036e-09	8.44125	zgc:114046; hist1h2ba
ENSDARG00000074656	28.0419	2.82776	0.423554	6.67628	2.45092e-11	3.85533e-09	8.41394	ctss2.1
ENSDARG00000053217	92.2169	1.56011	0.234792	6.64466	3.03916e-11	4.70595e-09	8.32735	cox7a2a
ENSDARG00000018404	311.427	1.12071	0.169404	6.61556	3.70138e-11	5.64319e-09	8.24848	krt18
ENSDARG00000013351	1548.51	0.989803	0.152414	6.49416	8.34968e-11	1.235e-08	7.90833	cirbpb
ENSDARG00000069583	85.0053	1.9949	0.307107	6.4958	8.25936e-11	1.235e-08	7.90833	zgc:114181
ENSDARG00000061169	120.955	-1.59301	0.248647	-6.40671	1.48697e-10	2.13563e-08	7.67047	larp1b
ENSDARG00000090912	86.539	1.46799	0.229063	6.40867	1.46793e-10	2.13563e-08	7.67047	npc2
ENSDARG00000023797	156.187	-1.20487	0.188247	-6.40047	1.54899e-10	2.19292e-08	7.65898	ryr1b
ENSDARG00000025581	1382.84	1.01575	0.160155	6.34231	2.26345e-10	3.15926e-08	7.50041	rpl10
ENSDARG00000091446	89.2327	-1.76396	0.278242	-6.33966	2.30269e-10	3.1694e-08	7.49902	zgc:163040; hist1h4l
ENSDARG00000041619	1929.74	1.03324	0.163867	6.30535	2.87545e-10	3.90353e-08	7.40854	gnb2l1
ENSDARG00000022767	1529.15	1.04712	0.166443	6.29114	3.15143e-10	4.22036e-08	7.37465	apobb.1
ENSDARG00000070835	862.924	-1.12011	0.180621	-6.20143	5.5954e-10	7.39338e-08	7.13116	tnnc2
ENSDARG00000002344	368.332	0.898419	0.145107	6.19143	5.96198e-10	7.7741e-08	7.10935	tubb4b
ENSDARG00000034273	22.7043	2.43799	0.393902	6.18933	6.04211e-10	7.77627e-08	7.10923	sid4
ENSDARG00000021838	2151.18	1.15801	0.187358	6.18073	6.38074e-10	8.10681e-08	7.09115	rps23
ENSDARG00000062262	30.1131	2.17416	0.352005	6.17649	6.55411e-10	8.1189e-08	7.0905	ednrab
ENSDARG00000070844	272.81	1.03888	0.168187	6.17693	6.53615e-10	8.1189e-08	7.0905	gamt
ENSDARG00000039832	11.3261	3.08198	0.50351	6.121	9.29903e-10	1.1377e-07	6.94397	gsta.2; gsta3
ENSDARG00000044267	79.9446	1.39583	0.231668	6.02513	1.68977e-09	2.04215e-07	6.68991	sumo1
ENSDARG00000074552	99.8513	1.4328	0.239144	5.99138	2.08069e-09	2.4843e-07	6.6048	ndufs7
ENSDARG00000022372	27.4255	2.05047	0.343397	5.97115	2.35582e-09	2.77931e-07	6.55606	kng1
ENSDARG00000007836	385.539	1.06082	0.178186	5.95344	2.62559e-09	3.06112e-07	6.51412	ctsla
ENSDARG00000099499	298.549	1.05158	0.17768	5.9184	3.25095e-09	3.74615e-07	6.42641	ndufa4l
ENSDARG00000097635	135.94	1.12073	0.189788	5.90517	3.52284e-09	4.0128e-07	6.39655	-
ENSDARG00000006691	1284.12	0.955272	0.162635	5.87372	4.26118e-09	4.79867e-07	6.31888	rpl12
ENSDARG00000041065	166.959	1.17286	0.200765	5.84194	5.15954e-09	5.74507e-07	6.2407	hspb1
ENSDARG00000101082	139.888	1.32088	0.226401	5.83426	5.40285e-09	5.94913e-07	6.22555	eif3s6ip
ENSDARG00000005191	247.531	0.962937	0.165571	5.81586	6.03244e-09	6.56939e-07	6.18247	ahcy
ENSDARG00000013961	76.505	1.43527	0.247304	5.80368	6.48764e-09	6.98832e-07	6.15563	slc31a1
ENSDARG00000093549	224.49	1.40583	0.245113	5.73542	9.72699e-09	1.0365e-06	5.98443	sepp1a
ENSDARG00000012215	33.8483	1.85582	0.323773	5.73187	9.93295e-09	1.04719e-06	5.97998	umps
ENSDARG00000015822	59.1271	1.64188	0.286952	5.72178	1.05416e-08	1.09966e-06	5.95874	sesn3
ENSDARG00000006260	660.587	0.988559	0.17316	5.70894	1.1368e-08	1.1735e-06	5.93052	tuba8l4
ENSDARG00000016319	51.4221	1.64178	0.288574	5.68928	1.27574e-08	1.30336e-06	5.88494	c9
ENSDARG00000011125	289.733	0.869934	0.153014	5.68534	1.30554e-08	1.30512e-06	5.88435	snrpb
ENSDARG00000088449	144.196	1.49493	0.262902	5.68628	1.29834e-08	1.30512e-06	5.88435	wu:fb55g09
ENSDARG00000092693	2189.86	0.957567	0.168472	5.68385	1.31697e-08	1.30512e-06	5.88435	tpt1
ENSDARG00000021242	109.055	1.26704	0.225446	5.62015	1.90796e-08	1.87207e-06	5.72768	mvp
ENSDARG00000009018	24.3201	2.00412	0.361834	5.53876	3.04616e-08	2.95956e-06	5.52877	rhbg
ENSDARG00000021107	84.3245	1.44756	0.261464	5.53635	3.08848e-08	2.97154e-06	5.52702	sf3a2
ENSDARG00000100422	79.9975	1.38316	0.2501	5.53042	3.19457e-08	3.04406e-06	5.51655	ptpro
ENSDARG00000034897	1650.93	0.989121	0.179076	5.52347	3.32373e-08	3.13697e-06	5.50349	rps10
ENSDARG00000036298	1455.74	0.894859	0.162617	5.50286	3.73669e-08	3.49345e-06	5.45675	rps13
ENSDARG00000077777	3193.89	0.704192	0.128195	5.49313	3.94864e-08	3.6571e-06	5.43686	tmsb4x
ENSDARG00000039547	95.8147	-1.66301	0.302943	-5.48954	4.02984e-08	3.69775e-06	5.43206	si:ch211-113a14.22
ENSDARG00000041607	30.4415	1.76951	0.323941	5.46245	4.69618e-08	4.26965e-06	5.36961	eif4ebp3l
ENSDARG00000035860	1371.74	1.01776	0.18737	5.43179	5.57926e-08	5.02641e-06	5.29874	rps28
ENSDARG00000037559	249.472	-1.00932	0.186032	-5.42551	5.77892e-08	5.15938e-06	5.2874	uba1
ENSDARG00000045248	1696.28	1.07686	0.19856	5.42336	5.84882e-08	5.17516e-06	5.28608	h3f3d
ENSDARG00000045399	181.774	1.11157	0.20517	5.41781	6.03323e-08	5.29109e-06	5.27645	cct5
ENSDARG00000021257	213.628	0.985985	0.182477	5.40333	6.54152e-08	5.68653e-06	5.24515	eif3d
ENSDARG00000040764	252.469	0.854783	0.158406	5.39614	6.80888e-08	5.86748e-06	5.23155	id1
ENSDARG00000099104	1698.13	1.19066	0.221481	5.37588	7.62095e-08	6.51065e-06	5.18638	rpl24
ENSDARG00000008363	60.7651	1.64919	0.306868	5.37426	7.68975e-08	6.51329e-06	5.1862	mcl1b
ENSDARG00000071331	64.3876	-1.2381	0.231037	-5.35886	8.37487e-08	7.03347e-06	5.15283	-
ENSDARG00000015524	232.329	0.857825	0.160124	5.35727	8.44904e-08	7.03614e-06	5.15267	prps1a
ENSDARG00000006200	409.07	-0.929631	0.174292	-5.33376	9.61983e-08	7.94437e-06	5.09994	eif4g1a
ENSDARG00000104181	175.973	1.09442	0.205304	5.33073	9.78163e-08	8.01124e-06	5.0963	tmsb1
ENSDARG00000103271	23.7404	1.98943	0.374355	5.31429	1.07076e-07	8.69777e-06	5.06059	-
ENSDARG00000077533	206.029	1.09964	0.207605	5.29677	1.17867e-07	9.4964e-06	5.02244	eif3f
ENSDARG00000088514	8.45456	-2.66304	0.504239	-5.2813	1.2827e-07	1.02512e-05	4.98922	and1
ENSDARG00000009978	118.352	1.25768	0.23877	5.26732	1.38432e-07	1.09749e-05	4.9596	icn
ENSDARG00000071601	192.75	1.26826	0.241251	5.25701	1.46416e-07	1.15157e-05	4.93871	pvalb9
ENSDARG00000020504	669.261	0.832196	0.158462	5.2517	1.50706e-07	1.16679e-05	4.93301	h3f3a
ENSDARG00000037997	302.42	-0.880871	0.167687	-5.25305	1.49599e-07	1.16679e-05	4.93301	tubb5
ENSDARG00000006487	734.777	-0.595274	0.113596	-5.24027	1.60342e-07	1.2223e-05	4.91282	anp32a
ENSDARG00000056483	88.5787	1.14398	0.21826	5.24134	1.59419e-07	1.2223e-05	4.91282	ssbp4
ENSDARG00000040298	32.2569	1.66312	0.318222	5.22628	1.72955e-07	1.30839e-05	4.88326	apoa4b.1
ENSDARG00000077559	38.0969	1.87309	0.359257	5.21379	1.85018e-07	1.38904e-05	4.85729	LOC792958
ENSDARG00000037867	209.109	0.993706	0.190755	5.20934	1.89511e-07	1.41207e-05	4.85014	atp5j2
ENSDARG00000093702	218.027	1.30581	0.250773	5.20715	1.91765e-07	1.4182e-05	4.84826	si:dkey-126g1.9
ENSDARG00000036427	60.0837	1.32463	0.255662	5.18116	2.20508e-07	1.61869e-05	4.79084	slc3a2a
ENSDARG00000036942	31.77	2.01532	0.39002	5.16724	2.37576e-07	1.73116e-05	4.76166	gpd1c
ENSDARG00000079932	92.601	1.47416	0.285922	5.1558	2.52551e-07	1.81361e-05	4.74146	zgc:152830
ENSDARG00000086411	44.465	1.56661	0.303828	5.15625	2.51951e-07	1.81361e-05	4.74146	srsf10b
ENSDARG00000020956	39.814	1.90903	0.370737	5.14929	2.61473e-07	1.86417e-05	4.72951	pck2
ENSDARG00000013804	66.702	1.31491	0.255684	5.14272	2.70791e-07	1.91681e-05	4.71742	capns1b
ENSDARG00000075482	18.7597	-2.07319	0.404639	-5.12356	2.99814e-07	2.1072e-05	4.67629	zgc:173587; zgc:114046
ENSDARG00000021987	528.773	-0.904246	0.176876	-5.11231	3.18241e-07	2.22096e-05	4.65346	si:ch211-165e15.1
ENSDARG00000059646	89.3375	1.29654	0.254542	5.0936	3.51321e-07	2.43468e-05	4.61356	nt5dc2
ENSDARG00000022684	549.27	0.895297	0.175858	5.09103	3.56124e-07	2.45083e-05	4.61069	fkbp1aa
ENSDARG00000004296	14.7875	2.20727	0.433913	5.08691	3.63942e-07	2.48736e-05	4.60426	ambp
ENSDARG00000024651	118.677	1.09436	0.215778	5.07169	3.94291e-07	2.67632e-05	4.57246	snrpa1
ENSDARG00000057353	37.4966	-1.47935	0.293356	-5.04283	4.58685e-07	3.09222e-05	4.50973	-
ENSDARG00000023151	23.6471	1.83945	0.365387	5.03426	4.79697e-07	3.21202e-05	4.49322	ucp1
ENSDARG00000051735	63.4753	-1.60901	0.319751	-5.03207	4.85209e-07	3.22713e-05	4.49118	si:ch211-113a14.18
ENSDARG00000043279	18.4056	2.03732	0.405189	5.02807	4.9545e-07	3.27327e-05	4.48502	aqp12
ENSDARG00000033738	203.398	0.994027	0.197822	5.02485	5.03838e-07	3.30665e-05	4.48061	zgc:153867
ENSDARG00000019881	110.007	1.03127	0.205452	5.01954	5.17945e-07	3.35479e-05	4.47433	bsg
ENSDARG00000032405	189.891	1.20568	0.240177	5.01999	5.16741e-07	3.35479e-05	4.47433	zgc:85975
ENSDARG00000005230	322.868	0.697005	0.139279	5.00438	5.60414e-07	3.6063e-05	4.44294	ssr2
ENSDARG00000054723	112.058	-1.01308	0.202795	-4.99557	5.8661e-07	3.75052e-05	4.42591	si:ch211-242b18.1
ENSDARG00000076856	39.4059	-1.50678	0.301757	-4.99335	5.93397e-07	3.76959e-05	4.42371	frem2a
ENSDARG00000011648	297.92	0.964862	0.194382	4.96375	6.91459e-07	4.36456e-05	4.36006	snrpd1
ENSDARG00000034916	49.2552	1.33648	0.270442	4.94181	7.73998e-07	4.85463e-05	4.31384	hat1
ENSDARG00000053291	1222.29	0.632011	0.128016	4.93698	7.93432e-07	4.94523e-05	4.30581	pnrc2
ENSDARG00000104279	413.619	0.915334	0.185552	4.93302	8.09668e-07	5.01488e-05	4.29974	appa
ENSDARG00000017014	156.494	-0.836847	0.169818	-4.9279	8.31179e-07	5.11614e-05	4.29106	ywhae2
ENSDARG00000071113	313.15	-0.748349	0.152047	-4.92184	8.57334e-07	5.24455e-05	4.28029	xirp2a
ENSDARG00000101406	1061.56	-0.737914	0.150005	-4.91925	8.6877e-07	5.28191e-05	4.27721	rplp2
ENSDARG00000097224	35.1185	-1.49503	0.304841	-4.90429	9.37656e-07	5.66596e-05	4.24673	-
ENSDARG00000098591	580.624	0.658014	0.134248	4.90149	9.51142e-07	5.71262e-05	4.24316	tubb2b
ENSDARG00000054823	96.0334	1.18654	0.242218	4.89865	9.64982e-07	5.72684e-05	4.24208	id3
ENSDARG00000086751	11.1547	-2.3056	0.470662	-4.89863	9.65069e-07	5.72684e-05	4.24208	LOC100334869; zgc:114046
ENSDARG00000003607	66.1728	1.16704	0.238575	4.89171	9.99633e-07	5.89664e-05	4.2294	nr2f6a
ENSDARG00000069912	22.2003	-1.92274	0.394294	-4.8764	1.08038e-06	6.29799e-05	4.2008	hmga2
ENSDARG00000079994	70.797	-1.24753	0.255791	-4.87716	1.07626e-06	6.29799e-05	4.2008	wu:fi15d04
ENSDARG00000041435	1355.95	0.906905	0.18629	4.86824	1.12596e-06	6.5253e-05	4.1854	uba52
ENSDARG00000077291	2651.7	0.944474	0.1942	4.86341	1.15378e-06	6.64764e-05	4.17733	rps2
ENSDARG00000054818	1886.37	0.791045	0.163332	4.84319	1.27772e-06	7.31919e-05	4.13554	rpl32
ENSDARG00000055475	627.753	0.864862	0.178657	4.84091	1.29246e-06	7.36107e-05	4.13306	rps27.2
ENSDARG00000030602	1632.86	0.897639	0.187075	4.79828	1.60037e-06	9.05536e-05	4.04309	rps19
ENSDARG00000099776	106.635	1.1612	0.242054	4.7973	1.60822e-06	9.05536e-05	4.04309	glula
ENSDARG00000100826	114.069	1.0018	0.208897	4.79568	1.62121e-06	9.07693e-05	4.04206	hif1al
ENSDARG00000042905	1478.74	0.932203	0.194497	4.79289	1.64394e-06	9.1525e-05	4.03846	rpl10a
ENSDARG00000042660	182.54	0.876269	0.182925	4.79031	1.66528e-06	9.21949e-05	4.03529	fam32a
ENSDARG00000020101	160.946	0.819044	0.171162	4.7852	1.70821e-06	9.40466e-05	4.02666	psmc2
ENSDARG00000086332	31.9354	1.59251	0.334003	4.76796	1.86104e-06	0.000101895	3.99185	bri3
ENSDARG00000013966	39.9748	1.53209	0.322305	4.75354	1.99887e-06	0.00010884	3.96321	psma6b
ENSDARG00000031317	41.6376	1.42738	0.300672	4.74729	2.06156e-06	0.000111639	3.95218	ppdpfb
ENSDARG00000011841	395.633	0.905351	0.191966	4.71619	2.40301e-06	0.000129423	3.88799	atp5l
ENSDARG00000061120	330.416	1.06443	0.225964	4.7106	2.4699e-06	0.000132306	3.87842	slc43a2b
ENSDARG00000034427	107.816	0.967313	0.205681	4.70298	2.56397e-06	0.000136607	3.86453	jpt2
ENSDARG00000005236	175.001	-1.11491	0.237729	-4.68984	2.73422e-06	0.000144855	3.83907	srcap
ENSDARG00000015057	38.9462	-1.38809	0.296042	-4.68881	2.74801e-06	0.000144855	3.83907	ube2d4
ENSDARG00000053254	2519.84	-0.715219	0.153284	-4.66598	3.07153e-06	0.000161052	3.79303	mylpfa
ENSDARG00000019644	544.724	0.971099	0.208386	4.66009	3.16069e-06	0.000164855	3.7829	ldhba
ENSDARG00000099306	48.3167	1.3337	0.286308	4.65828	3.18862e-06	0.000165441	3.78136	zgc:175088
ENSDARG00000045958	28.0939	-1.53264	0.329307	-4.65413	3.25352e-06	0.000167929	3.77487	egfl6
ENSDARG00000101500	7.32051	-2.3535	0.506064	-4.65059	3.30981e-06	0.000169949	3.76968	-
ENSDARG00000099420	116.112	-1.02989	0.221662	-4.64621	3.38082e-06	0.0001727	3.76271	nme2b.2
ENSDARG00000014690	1486.88	0.855955	0.184426	4.64119	3.46405e-06	0.000176045	3.75438	rps4x
ENSDARG00000022165	23.5786	1.67866	0.362589	4.62964	3.66294e-06	0.000185203	3.73235	mgst1.2
ENSDARG00000070057	11.2339	2.19275	0.474327	4.62285	3.78496e-06	0.000190401	3.72033	si:dkey-69o16.5
ENSDARG00000075831	25.715	1.70143	0.368317	4.61948	3.8471e-06	0.000192549	3.71546	slc7a8a
ENSDARG00000040492	31.238	1.49534	0.324534	4.60764	4.07269e-06	0.000202816	3.6929	mthfd1b
ENSDARG00000012458	77.4441	1.03486	0.224727	4.60498	4.12509e-06	0.000203543	3.69134	zgc:77849
ENSDARG00000036875	2849.54	0.915539	0.198838	4.60445	4.13548e-06	0.000203543	3.69134	rps12
ENSDARG00000059053	44.9111	1.49717	0.325204	4.60378	4.14891e-06	0.000203543	3.69134	slc13a4
ENSDARG00000014488	11.6898	-2.07836	0.451584	-4.60238	4.17695e-06	0.000203909	3.69056	ca2
ENSDARG00000044125	102.204	1.07778	0.234816	4.58988	4.43507e-06	0.000215449	3.66666	txn
ENSDARG00000036161	724.08	0.727985	0.158831	4.5834	4.57472e-06	0.000220641	3.65631	hnrnpa0l
ENSDARG00000038559	463.461	1.0409	0.227129	4.58287	4.58648e-06	0.000220641	3.65631	h1f0
ENSDARG00000070447	17.3025	1.82462	0.398474	4.57903	4.67136e-06	0.000223638	3.65045	slc39a9
ENSDARG00000095921	143.489	0.921748	0.201405	4.57659	4.72606e-06	0.000225169	3.64749	-
ENSDARG00000036776	6.37555	2.38554	0.521427	4.57502	4.76182e-06	0.000225788	3.6463	aldh8a1
ENSDARG00000062590	786.23	-0.693494	0.151719	-4.57092	4.85578e-06	0.000229146	3.63989	pleca
ENSDARG00000075709	118.111	0.993073	0.217506	4.56574	4.97741e-06	0.000233773	3.63121	ndufb3
ENSDARG00000036107	39.7692	1.52934	0.335528	4.55802	5.16373e-06	0.00024138	3.6173	txnipa
ENSDARG00000070297	17.1261	-1.84068	0.404126	-4.55472	5.24562e-06	0.000244057	3.61251	zgc:114046; si:ch211-113a14.28
ENSDARG00000057075	29.5186	1.48036	0.325401	4.54935	5.38126e-06	0.000249198	3.60346	lamtor3
ENSDARG00000021252	368.507	0.678885	0.149373	4.54491	5.49581e-06	0.000253319	3.59633	cct6a
ENSDARG00000027249	565.309	0.612145	0.13472	4.54385	5.52366e-06	0.000253423	3.59615	btg1
ENSDARG00000051778	9.66408	-2.17811	0.480213	-4.53572	5.74072e-06	0.000260966	3.58342	zgc:194989
ENSDARG00000063921	701.598	-1.01005	0.222648	-4.53653	5.71884e-06	0.000260966	3.58342	ND5
ENSDARG00000054578	78.9101	1.05959	0.233693	4.53413	5.78408e-06	0.000261736	3.58214	arl6ip1
ENSDARG00000076223	106.513	1.04803	0.23141	4.52889	5.92935e-06	0.00026709	3.57334	zgc:92744
ENSDARG00000068507	58.122	-1.30312	0.288253	-4.52074	6.16232e-06	0.000276328	3.55857	crybb1
ENSDARG00000013931	253.993	0.905031	0.200596	4.51172	6.43047e-06	0.000287054	3.54204	eif3m
ENSDARG00000099375	24.1463	1.62283	0.360194	4.50543	6.62386e-06	0.000294361	3.53112	poldip3
ENSDARG00000053269	10.9274	-1.99877	0.444025	-4.50149	6.74794e-06	0.000297209	3.52694	slc2a15b
ENSDARG00000089355	97.2056	-1.07906	0.239682	-4.50206	6.72977e-06	0.000297209	3.52694	si:dkeyp-121d4.3
ENSDARG00000057583	305.318	-0.77138	0.171676	-4.49323	7.0152e-06	0.000307613	3.51199	prrc2c
ENSDARG00000009735	106.45	-0.918721	0.20472	-4.4877	7.19968e-06	0.000313888	3.50322	gigfy2
ENSDARG00000034291	2343.73	0.796352	0.177478	4.48705	7.22165e-06	0.000313888	3.50322	rpl37
ENSDARG00000045132	179.366	1.10763	0.246925	4.48569	7.26775e-06	0.000314513	3.50236	vdac1
ENSDARG00000000086	28.6205	-1.45073	0.324797	-4.46659	7.94778e-06	0.000342446	3.46541	itsn1
ENSDARG00000087456	80.3036	1.06283	0.238299	4.46007	8.19316e-06	0.00035149	3.45409	-
ENSDARG00000105507	7.49243	-2.27929	0.511489	-4.4562	8.34271e-06	0.000356363	3.44811	zgc:112234; si:ch1073-159d7.13
ENSDARG00000070922	591.964	-0.648095	0.145841	-4.44384	8.83673e-06	0.000373076	3.4282	cnbpb
ENSDARG00000093195	20.7884	-1.96401	0.441986	-4.44359	8.8469e-06	0.000373076	3.4282	si:dkey-261m9.6
ENSDARG00000098488	8.71122	-2.05682	0.46274	-4.44487	8.79446e-06	0.000373076	3.4282	-
ENSDARG00000010312	20.383	2.0059	0.451984	4.43799	9.08012e-06	0.000381288	3.41875	cp
ENSDARG00000063126	216.805	-1.00584	0.227241	-4.42633	9.58498e-06	0.00040079	3.39708	gusb
ENSDARG00000052712	181.307	0.844622	0.191357	4.41386	1.01542e-05	0.000422806	3.37386	suclg1
ENSDARG00000031511	73.087	1.21215	0.275948	4.39267	1.11965e-05	0.000464257	3.33324	psmb2
ENSDARG00000076833	50.918	-1.55324	0.353814	-4.38999	1.13356e-05	0.000468068	3.32969	atp1b1b
ENSDARG00000094041	178.355	1.10942	0.253429	4.37764	1.19972e-05	0.00049333	3.30686	krt17
ENSDARG00000053973	621.027	1.40156	0.320272	4.37614	1.20798e-05	0.000494671	3.30568	fetub
ENSDARG00000019230	2354.94	0.784775	0.179524	4.37141	1.23445e-05	0.000503432	3.29806	rpl7a
ENSDARG00000098850	26.5068	-1.65528	0.379194	-4.36525	1.26979e-05	0.000515724	3.28758	-
ENSDARG00000042751	18.0775	-1.63389	0.374491	-4.36297	1.28311e-05	0.000519004	3.28483	riok3
ENSDARG00000094191	29.7697	1.47898	0.339824	4.35219	1.34784e-05	0.000542971	3.26522	nup37
ENSDARG00000052641	216.652	-0.788691	0.181321	-4.34969	1.36331e-05	0.000546978	3.26203	kpna3
ENSDARG00000001769	8.86643	-2.05853	0.47352	-4.34729	1.37832e-05	0.000550617	3.25915	ptpra
ENSDARG00000015422	63.9931	1.0521	0.242059	4.34647	1.38349e-05	0.000550617	3.25915	ppil1
ENSDARG00000099371	177.387	-0.784492	0.181051	-4.333	1.47094e-05	0.00058308	3.23427	cygb1
ENSDARG00000009250	109.139	0.86726	0.20048	4.32591	1.51901e-05	0.000599736	3.22204	etfb
ENSDARG00000042732	55.0207	1.19225	0.275685	4.32469	1.52749e-05	0.000600693	3.22135	tmem189
ENSDARG00000037962	134.043	0.87132	0.201834	4.31702	1.58147e-05	0.000617023	3.2097	psmb7
ENSDARG00000083699	14.9091	-1.83118	0.424153	-4.31726	1.57977e-05	0.000617023	3.2097	-
ENSDARG00000040401	42.0566	1.47893	0.342796	4.3143	1.60107e-05	0.000622221	3.20606	slc25a20
ENSDARG00000038667	13.9826	1.90517	0.441791	4.31238	1.61509e-05	0.000625217	3.20397	-
ENSDARG00000038713	24.7734	1.55294	0.361157	4.29992	1.70862e-05	0.000658851	3.18121	-
ENSDARG00000019398	23.6331	1.50337	0.349835	4.29737	1.72839e-05	0.000663888	3.17791	psma6a
ENSDARG00000006385	6.67874	2.22391	0.518026	4.29305	1.76235e-05	0.000674321	3.17113	-
ENSDARG00000037307	18.5615	1.70941	0.399085	4.28333	1.84118e-05	0.000699468	3.15523	gnpda1
ENSDARG00000039677	45.354	1.18335	0.276278	4.28321	1.84219e-05	0.000699468	3.15523	dsc2l
ENSDARG00000056167	98.0679	1.10817	0.258912	4.28009	1.86815e-05	0.000706617	3.15082	hspe1
ENSDARG00000003854	159.588	0.837054	0.195822	4.27456	1.91515e-05	0.000710828	3.14824	acsl1b
ENSDARG00000005926	110.391	0.838859	0.196153	4.27656	1.89803e-05	0.000710828	3.14824	ak2
ENSDARG00000036316	1004.77	0.744649	0.174173	4.27534	1.90847e-05	0.000710828	3.14824	rpl39
ENSDARG00000036832	2065.49	1.30628	0.305562	4.27501	1.91126e-05	0.000710828	3.14824	cyt1l
ENSDARG00000039302	38.2416	1.52902	0.357574	4.2761	1.90196e-05	0.000710828	3.14824	terfa
ENSDARG00000069135	31.6528	1.67196	0.39241	4.26074	2.03749e-05	0.000753417	3.12296	ppp1r15a
ENSDARG00000004757	449.027	-0.670922	0.157589	-4.25742	2.06795e-05	0.00075471	3.12222	ybx1
ENSDARG00000057556	1285.81	0.819238	0.19244	4.25711	2.07091e-05	0.00075471	3.12222	rpl17
ENSDARG00000091801	80.7721	1.04477	0.245316	4.25886	2.05475e-05	0.00075471	3.12222	serpinb14
ENSDARG00000092798	307.298	0.702955	0.165127	4.25705	2.07146e-05	0.00075471	3.12222	ppib
ENSDARG00000000069	70.7226	1.07667	0.253238	4.25161	2.12235e-05	0.000770422	3.11327	dap
ENSDARG00000029639	96.7383	-1.02338	0.240868	-4.24872	2.15e-05	0.000774781	3.11082	tomm70a
ENSDARG00000088383	116.845	0.91212	0.214654	4.24925	2.14487e-05	0.000774781	3.11082	cox5aa
ENSDARG00000038000	6.93378	2.1542	0.50749	4.24481	2.18782e-05	0.000785554	3.10482	crls1
ENSDARG00000023157	17.0862	1.80269	0.425211	4.23951	2.24008e-05	0.000801416	3.09614	si:rp71-1g18.7; cbln10
ENSDARG00000007221	64.3496	1.07162	0.253005	4.23557	2.27972e-05	0.000812664	3.09009	pbk
ENSDARG00000035986	26.2382	-1.37352	0.325492	-4.21981	2.44506e-05	0.000867702	3.06163	ptpn2b
ENSDARG00000037244	5.33423	2.23674	0.530133	4.21921	2.45163e-05	0.000867702	3.06163	gpr137
ENSDARG00000070866	42.494	1.17105	0.277659	4.21758	2.4694e-05	0.000870881	3.06004	tmem11
ENSDARG00000030490	48.8722	-1.21865	0.289353	-4.21163	2.53534e-05	0.000890965	3.05014	sptb
ENSDARG00000020007	446.615	-0.604926	0.143871	-4.20463	2.61511e-05	0.00091575	3.03822	col1a2
ENSDARG00000045155	25.4748	-1.46979	0.350175	-4.1973	2.70121e-05	0.000942571	3.02569	phf5a
ENSDARG00000019778	2372.86	0.747175	0.178139	4.19434	2.73668e-05	0.000951597	3.02155	rps6
ENSDARG00000078992	113.882	-0.834769	0.199254	-4.18947	2.79606e-05	0.000968843	3.01375	wnk1a
ENSDARG00000026712	116.199	-0.802139	0.191685	-4.18467	2.85578e-05	0.000986091	3.00608	rab5c
ENSDARG00000038075	173.733	0.850214	0.20356	4.17673	2.9573e-05	0.0010176	2.99242	cyc1
ENSDARG00000105397	10.0098	-2.01034	0.481475	-4.17537	2.97496e-05	0.00102013	2.99134	si:dkey-23a13.8
ENSDARG00000059630	27.9914	-1.32665	0.317864	-4.17364	2.99767e-05	0.00102086	2.99104	mlec
ENSDARG00000098573	47.0903	-1.32048	0.316364	-4.17394	2.9937e-05	0.00102086	2.99104	sgcd
ENSDARG00000075989	123.633	0.828674	0.198658	4.17136	3.02788e-05	0.00102761	2.98817	arpc2
ENSDARG00000010873	83.3058	0.99267	0.238031	4.17034	3.04151e-05	0.00102872	2.9877	si:dkey-156n14.5
ENSDARG00000099514	36.0904	-2.09476	0.502499	-4.16869	3.06354e-05	0.00103264	2.98605	zgc:112234; si:dkey-23a13.5
ENSDARG00000045352	52.563	1.14574	0.275147	4.16412	3.12562e-05	0.00105	2.97881	cst14a.2
ENSDARG00000077664	48.2185	1.15869	0.27882	4.1557	3.24291e-05	0.00108572	2.96428	zgc:110239
ENSDARG00000020364	57.514	1.11755	0.269094	4.15302	3.28113e-05	0.00109482	2.96066	fbp1b
ENSDARG00000101199	37.2935	1.48265	0.357376	4.1487	3.34373e-05	0.00111196	2.95391	rbp4
ENSDARG00000019181	2577.63	0.642541	0.154999	4.14545	3.39154e-05	0.00111662	2.9521	rpsa
ENSDARG00000077934	234.849	0.635156	0.153208	4.14572	3.38745e-05	0.00111662	2.9521	tegt
ENSDARG00000105323	31.4366	1.60357	0.386687	4.14696	3.36926e-05	0.00111662	2.9521	si:ch1073-456m8.1
ENSDARG00000022101	110.245	-0.893076	0.215588	-4.14251	3.43529e-05	0.00112356	2.94941	-
ENSDARG00000104682	336.705	0.83165	0.20073	4.14312	3.42606e-05	0.00112356	2.94941	tpm2
ENSDARG00000008502	167.697	0.769937	0.186034	4.13869	3.49296e-05	0.00113866	2.94361	pno1
ENSDARG00000076332	17.581	-1.66865	0.403674	-4.13367	3.57017e-05	0.00116001	2.93554	si:ch211-159i8.4
ENSDARG00000018334	1255.95	0.741093	0.179447	4.12987	3.62965e-05	0.00117548	2.92978	rpl35
ENSDARG00000033999	15.6675	1.75602	0.425542	4.12654	3.68257e-05	0.00118488	2.92633	cyp26a1
ENSDARG00000091090	16.8934	-1.63653	0.396553	-4.1269	3.67679e-05	0.00118488	2.92633	-
ENSDARG00000008703	28.4475	1.48944	0.361063	4.12514	3.70509e-05	0.0011869	2.92559	-
ENSDARG00000042236	611.892	-0.577191	0.139936	-4.12466	3.71279e-05	0.0011869	2.92559	atrx
ENSDARG00000076312	88.5732	-0.882876	0.21435	-4.11885	3.8077e-05	0.00121272	2.91624	myot
ENSDARG00000097057	72.219	1.05768	0.256829	4.11822	3.81806e-05	0.00121272	2.91624	fxyd6l
ENSDARG00000018961	94.5189	0.935162	0.227426	4.11193	3.92364e-05	0.00124228	2.90578	gtpbp4
ENSDARG00000060521	22.4683	-1.48875	0.362657	-4.10512	4.04099e-05	0.00127536	2.89437	rbm27
ENSDARG00000102674	165.92	-0.807383	0.196956	-4.0993	4.14408e-05	0.00130374	2.88481	ckap5
ENSDARG00000089976	43.7147	1.1546	0.281952	4.09502	4.22124e-05	0.00132381	2.87817	spcs3
ENSDARG00000014569	117.652	0.881959	0.215526	4.09212	4.27444e-05	0.00132789	2.87684	-
ENSDARG00000016706	68.7736	0.940592	0.22982	4.09273	4.26327e-05	0.00132789	2.87684	atic
ENSDARG00000079278	11.9222	-1.79577	0.438721	-4.09319	4.25479e-05	0.00132789	2.87684	zgc:174877
ENSDARG00000033089	5.19887	-2.1206	0.51886	-4.08703	4.36932e-05	0.00135312	2.86866	-
ENSDARG00000099755	27.9353	1.43355	0.351756	4.07541	4.59339e-05	0.00141808	2.8483	pfklb
ENSDARG00000016763	130.515	-0.860424	0.21127	-4.07262	4.64868e-05	0.0014307	2.84445	znf292a
ENSDARG00000068995	245.084	0.903294	0.221879	4.07111	4.67902e-05	0.00143557	2.84297	zgc:101846
ENSDARG00000075538	6.78561	-2.05633	0.505232	-4.07007	4.69989e-05	0.00143753	2.84238	zgc:163061
ENSDARG00000044093	1833.09	0.636191	0.156481	4.0656	4.79089e-05	0.00145638	2.83672	rpl13a
ENSDARG00000063075	41.8109	-1.13904	0.280216	-4.06488	4.80562e-05	0.00145638	2.83672	soga1
ENSDARG00000103590	9.02117	1.99513	0.490817	4.06491	4.80511e-05	0.00145638	2.83672	-
ENSDARG00000054438	23.8124	1.42352	0.350599	4.06024	4.90233e-05	0.00148106	2.82943	fzd2
ENSDARG00000105208	8.60368	2.08077	0.512563	4.05954	4.91695e-05	0.00148106	2.82943	zgc:85843
ENSDARG00000097691	140.755	0.985672	0.24307	4.0551	5.01125e-05	0.00150489	2.82249	-
ENSDARG00000105414	11.7067	-1.79519	0.442803	-4.05415	5.03171e-05	0.00150647	2.82204	zgc:112234; si:ch73-368j24.10
ENSDARG00000101160	8.70122	1.97615	0.488836	4.04256	5.28702e-05	0.00157814	2.80185	apoa4a
ENSDARG00000012987	33.1482	1.45045	0.358998	4.04028	5.33865e-05	0.00158705	2.79941	gpia
ENSDARG00000071082	46.2682	1.52111	0.376527	4.03984	5.34887e-05	0.00158705	2.79941	p4ha1b
ENSDARG00000099281	11.572	1.82965	0.453377	4.03561	5.44599e-05	0.00161104	2.79289	-
ENSDARG00000017084	83.5952	0.858042	0.213332	4.0221	5.76818e-05	0.00170127	2.76923	bud31
ENSDARG00000067990	729.976	-0.814885	0.203165	-4.01095	6.04752e-05	0.00177837	2.74998	myhz1.1
ENSDARG00000100442	21.7672	1.44479	0.360508	4.00766	6.13224e-05	0.00179794	2.74522	cfh
ENSDARG00000053365	2125.68	0.816497	0.203822	4.00592	6.17763e-05	0.00180591	2.7433	rpl31
ENSDARG00000074229	121.863	-0.823817	0.205701	-4.00494	6.20345e-05	0.00180812	2.74277	prr12a
ENSDARG00000016788	29.4584	-1.34728	0.336518	-4.00359	6.23886e-05	0.00181311	2.74158	zeb1a
ENSDARG00000028336	13.4991	1.82051	0.455486	3.99685	6.4192e-05	0.00186007	2.73047	dhdhl
ENSDARG00000032708	28.4822	1.33286	0.333722	3.99391	6.49913e-05	0.00187774	2.72637	arl4cb
ENSDARG00000098670	130.769	0.865862	0.216921	3.9916	6.56301e-05	0.00189068	2.72338	map4k4
ENSDARG00000105195	44.6601	-1.09755	0.275358	-3.98592	6.72204e-05	0.00193088	2.71424	dnajc21
ENSDARG00000025073	2486.77	0.823033	0.206594	3.98382	6.78155e-05	0.00194235	2.71167	rpl18a
ENSDARG00000073732	95.6517	-0.919857	0.230987	-3.98228	6.82563e-05	0.00194373	2.71136	myh14
ENSDARG00000099184	215.656	-0.721401	0.181129	-3.98281	6.81053e-05	0.00194373	2.71136	map2k6
ENSDARG00000042010	33.4597	2.01779	0.506808	3.98137	6.85178e-05	0.00194559	2.71095	-
ENSDARG00000073872	13.0775	1.73917	0.437161	3.97832	6.94025e-05	0.00196508	2.70662	tpst1
ENSDARG00000025147	50.5221	1.21601	0.305794	3.97657	6.99159e-05	0.00197398	2.70466	cd63
ENSDARG00000016239	73.4946	0.975494	0.245586	3.97211	7.12377e-05	0.00200558	2.69776	psmd13
ENSDARG00000015128	1778.21	0.803266	0.202312	3.97043	7.17433e-05	0.0020141	2.69592	rpl27
ENSDARG00000099999	128.086	-0.983324	0.247736	-3.96924	7.21009e-05	0.00201842	2.69499	tcf3b
ENSDARG00000007347	33.5762	1.23754	0.312429	3.96101	7.46331e-05	0.00208342	2.68122	degs1
ENSDARG00000095254	18.4782	1.53497	0.387592	3.96027	7.48664e-05	0.00208406	2.68109	si:dkey-239j18.2
ENSDARG00000091236	5.46578	2.09148	0.528416	3.95803	7.55717e-05	0.0020978	2.67824	cst14b.2
ENSDARG00000040245	325.973	0.646123	0.163766	3.9454	7.96679e-05	0.00220533	2.65653	kpnb3
ENSDARG00000007385	371.948	0.73239	0.185752	3.94284	8.05212e-05	0.00222274	2.65311	cct7
ENSDARG00000080337	314528	-0.536841	0.13667	-3.92801	8.5653e-05	0.00235784	2.62749	-
ENSDARG00000030213	50.8672	1.11325	0.283735	3.92354	8.72581e-05	0.00239537	2.62063	sap30l
ENSDARG00000005479	117.954	-0.724987	0.184869	-3.92164	8.79495e-05	0.00240768	2.6184	tenm3; zgc:153720
ENSDARG00000043923	57.1596	1.09514	0.279331	3.92059	8.83318e-05	0.00241148	2.61772	sox9b
ENSDARG00000033367	13.6535	1.80612	0.460787	3.91963	8.86841e-05	0.00241445	2.61718	rrm2b
ENSDARG00000026842	252.041	-0.712867	0.182243	-3.91163	9.16741e-05	0.00247619	2.60622	acin1b
ENSDARG00000054355	145.115	0.942968	0.241068	3.91162	9.16774e-05	0.00247619	2.60622	dcaf7
ENSDARG00000102832	815.249	-0.544523	0.139209	-3.91156	9.17015e-05	0.00247619	2.60622	-
ENSDARG00000087390	5.15558	2.07235	0.53005	3.90972	9.24024e-05	0.00248834	2.60409	hbbe1.3
ENSDARG00000070674	87.9481	0.821898	0.210461	3.90522	9.41387e-05	0.00252822	2.59718	psmd6
ENSDARG00000104587	202.628	-0.614567	0.157572	-3.90023	9.60999e-05	0.00257392	2.58941	srl
ENSDARG00000026369	132.051	0.792116	0.20314	3.89936	9.64459e-05	0.00257622	2.58902	dbi
ENSDARG00000032637	37.8669	-1.55887	0.399927	-3.89789	9.70357e-05	0.00258501	2.58754	si:dkey-261m9.12
ENSDARG00000020015	29.7085	-1.32833	0.340908	-3.89643	9.7619e-05	0.00259358	2.5861	mrps33
ENSDARG00000060199	23.5349	1.35598	0.348077	3.89564	9.79392e-05	0.00259513	2.58584	mrpl18
ENSDARG00000060977	77.5091	0.928888	0.238666	3.89199	9.94233e-05	0.00262044	2.58163	zgc:153018
ENSDARG00000061052	428.457	-0.581647	0.149427	-3.89252	9.92102e-05	0.00262044	2.58163	nipblb
ENSDARG00000044565	173.722	0.702109	0.180459	3.89068	9.99635e-05	0.00262074	2.58158	ola1
ENSDARG00000062020	116.756	-0.882993	0.226922	-3.89117	9.97619e-05	0.00262074	2.58158	gse1
ENSDARG00000040439	202.207	0.904832	0.233023	3.88302	0.000103167	0.00269758	2.56903	rsl24d1
ENSDARG00000013475	451.504	0.571213	0.147212	3.88021	0.000104364	0.00272172	2.56516	cct4
ENSDARG00000006399	457.698	-0.49391	0.127313	-3.8795	0.00010467	0.00272252	2.56503	ywhae1
ENSDARG00000032651	91.4158	-0.959039	0.247285	-3.87827	0.000105202	0.00272921	2.56396	ppp1r10
ENSDARG00000102105	64.9849	0.998565	0.257612	3.87624	0.000106083	0.00274485	2.56148	dad1
ENSDARG00000040027	29.0746	1.48191	0.382487	3.8744	0.000106889	0.00275852	2.55932	osbpl10b
ENSDARG00000063518	14.9805	1.58471	0.409115	3.8735	0.000107284	0.00276152	2.55885	zgc:153913
ENSDARG00000090228	41.3626	1.06965	0.276208	3.87262	0.000107672	0.00276432	2.55841	gsta.1
ENSDARG00000098228	138.867	-0.66783	0.172505	-3.87136	0.00010823	0.00277148	2.55729	thrap3b
ENSDARG00000098845	17.1196	-1.41897	0.366776	-3.86876	0.000109392	0.00279402	2.55377	lrp12
ENSDARG00000100514	29.309	1.33444	0.345018	3.86774	0.000109849	0.00279846	2.55308	cfap20
ENSDARG00000015460	45.3327	1.16267	0.300941	3.86345	0.000111796	0.00284077	2.54656	racgap1
ENSDARG00000051939	37.079	1.20654	0.312392	3.86226	0.000112344	0.0028474	2.54555	pcxb
ENSDARG00000068123	76.1128	0.960547	0.248757	3.86139	0.000112745	0.00285025	2.54512	gkap1
ENSDARG00000096978	13.9374	-1.85854	0.481518	-3.85975	0.000113502	0.00286209	2.54332	-
ENSDARG00000035329	178.357	0.815502	0.211532	3.85522	0.000115627	0.00290092	2.53746	capns1a
ENSDARG00000057322	145.821	0.890858	0.231064	3.85547	0.000115509	0.00290092	2.53746	tmem47
ENSDARG00000100095	120.528	0.782284	0.203009	3.85345	0.000116466	0.0029146	2.53542	anxa1b
ENSDARG00000058868	105.178	-0.810768	0.21047	-3.85219	0.000117067	0.00292226	2.53428	apc
ENSDARG00000016260	588.928	-0.543296	0.141105	-3.85029	0.000117978	0.0029376	2.53201	fxr2
ENSDARG00000009212	1053.01	0.629483	0.163649	3.84654	0.000119798	0.00297543	2.52645	ppiaa
ENSDARG00000095142	17.6184	-1.45994	0.37993	-3.84265	0.000121712	0.00301542	2.52065	si:ch211-208h16.4
ENSDARG00000057853	235.921	0.621067	0.161681	3.8413	0.000122384	0.0030245	2.51935	atp6v0ca
ENSDARG00000027109	160.463	-0.663597	0.172873	-3.83864	0.000123716	0.00304948	2.51577	zfr
ENSDARG00000086222	131.186	-0.987835	0.257379	-3.83806	0.00012401	0.00304948	2.51577	nat16
ENSDARG00000005162	275.18	0.550525	0.143568	3.83458	0.000125778	0.00307767	2.51178	tpm3
ENSDARG00000101891	32.2661	-1.288	0.335866	-3.83486	0.000125634	0.00307767	2.51178	arid1ab
ENSDARG00000099635	183.414	0.713262	0.186275	3.82909	0.000128617	0.0031394	2.50315	akap8l
ENSDARG00000046030	43.4351	1.16683	0.304853	3.82751	0.000129445	0.00314412	2.5025	zgc:110339
ENSDARG00000077530	60.9853	-0.900803	0.235341	-3.82765	0.000129371	0.00314412	2.5025	-
ENSDARG00000097959	59.4445	0.948736	0.247945	3.8264	0.000130029	0.00315058	2.50161	si:dkey-248g15.3
ENSDARG00000017844	46.2467	1.06397	0.278145	3.82524	0.000130643	0.00315774	2.50062	-
ENSDARG00000019717	37.6939	1.27536	0.333733	3.82151	0.000132635	0.00319067	2.49612	pbx2
ENSDARG00000042835	88.0862	-0.786892	0.205912	-3.82149	0.000132649	0.00319067	2.49612	tfdp2
ENSDARG00000074121	118.73	-0.730821	0.19147	-3.81689	0.000135144	0.00324279	2.48908	dnmbp
ENSDARG00000071212	108.502	-0.801885	0.210137	-3.816	0.000135633	0.00324667	2.48856	p3h1
ENSDARG00000006584	28.9978	-1.39394	0.365602	-3.81273	0.00013744	0.003282	2.48386	phf8
ENSDARG00000042530	64.9861	0.941835	0.247176	3.81038	0.000138754	0.00330542	2.48077	nup205
ENSDARG00000018637	261.176	0.638664	0.167671	3.80903	0.000139511	0.00331547	2.47946	sec61g
ENSDARG00000060030	61.7104	-0.936523	0.246435	-3.80029	0.000144529	0.00342652	2.46515	setd1a
ENSDARG00000071009	25.8263	-1.32094	0.347686	-3.79922	0.000145151	0.00343304	2.46432	kif20ba
ENSDARG00000044575	37.7687	-1.08082	0.284662	-3.79685	0.000146545	0.00344954	2.46224	vars
ENSDARG00000055120	127.187	0.902783	0.23777	3.79688	0.00014653	0.00344954	2.46224	ctsba
ENSDARG00000077456	88.7482	-1.09435	0.288452	-3.79386	0.000148321	0.00348309	2.45804	zgc:110216
ENSDARG00000035325	46.8402	1.0277	0.270939	3.79312	0.000148769	0.00348534	2.45775	srsf7a
ENSDARG00000103515	40.1992	-1.17946	0.311075	-3.79157	0.000149699	0.00349886	2.45607	-
ENSDARG00000016871	187.614	0.677124	0.178713	3.78888	0.000151327	0.0035286	2.4524	smarce1
ENSDARG00000038228	183.469	0.693263	0.183032	3.78765	0.000152077	0.00353775	2.45127	sepw2a
ENSDARG00000057249	60.928	-0.876534	0.231492	-3.78645	0.000152813	0.00354655	2.45019	zmynd11
ENSDARG00000038737	54.2978	-1.07565	0.284284	-3.78372	0.000154503	0.0035774	2.44643	phf20b
ENSDARG00000080009	126.304	-0.825047	0.218329	-3.77891	0.000157517	0.00363869	2.43906	bahcc1b
ENSDARG00000051718	35.4862	-1.35954	0.35995	-3.77702	0.000158719	0.00365791	2.43677	si:ch211-113a14.24
ENSDARG00000102417	103.663	-0.754303	0.199838	-3.77457	0.000160284	0.00368541	2.43351	psmd7
ENSDARG00000045801	21.0327	-1.32419	0.351056	-3.77203	0.000161926	0.00371092	2.43052	fbxl14b
ENSDARG00000046157	1195.88	0.719594	0.190788	3.7717	0.000162142	0.00371092	2.43052	zgc:114188
ENSDARG00000029064	136.443	0.779158	0.206698	3.76955	0.00016354	0.00373428	2.42779	uqcrq
ENSDARG00000038121	23.6407	-1.29164	0.343211	-3.76339	0.000167625	0.00381877	2.41808	LOC565819
ENSDARG00000015862	598.584	0.60633	0.161201	3.76133	0.000169013	0.00382402	2.41748	rpl5b
ENSDARG00000091001	49.96	1.14232	0.303622	3.76231	0.000168353	0.00382402	2.41748	-
ENSDARG00000102249	15.4297	1.54442	0.410573	3.76162	0.000168819	0.00382402	2.41748	-
ENSDARG00000079727	13.5568	1.62368	0.432058	3.75801	0.000171268	0.00386621	2.41271	sepp1b
ENSDARG00000019702	38.8037	1.13922	0.303409	3.75475	0.000173513	0.00389391	2.40961	aldocb
ENSDARG00000040725	73.7929	0.964513	0.256903	3.75438	0.000173772	0.00389391	2.40961	zgc:114130
ENSDARG00000044601	263.891	-0.63472	0.169044	-3.75477	0.000173504	0.00389391	2.40961	rtn4a
ENSDARG00000095744	9.07849	1.84301	0.490953	3.75395	0.000174067	0.00389391	2.40961	si:dkey-269i1.4
ENSDARG00000005791	1680.22	0.653666	0.174209	3.7522	0.000175286	0.00389482	2.40951	rpl28
ENSDARG00000026829	75.8793	1.01544	0.270577	3.75288	0.000174816	0.00389482	2.40951	cotl1
ENSDARG00000043453	1659.63	0.671222	0.178875	3.75247	0.000175104	0.00389482	2.40951	rps5
ENSDARG00000077620	198.086	0.717939	0.191372	3.75153	0.000175758	0.00389657	2.40932	cdca7a
ENSDARG00000090697	259.684	0.629485	0.168124	3.74416	0.000180996	0.00400373	2.39754	eif3ea
ENSDARG00000077044	12.6253	1.61507	0.43204	3.73824	0.000185311	0.00409006	2.38827	arl6ip5a
ENSDARG00000079637	22.5389	-1.28304	0.34328	-3.73759	0.000185791	0.00409153	2.38811	-
ENSDARG00000089124	708.129	-1.66327	0.445126	-3.73662	0.000186508	0.00409822	2.3874	LOC100334599
ENSDARG00000013443	75.8474	0.896946	0.240302	3.73259	0.000189523	0.0041531	2.38163	atp6v1ba
ENSDARG00000056640	42.4033	1.06896	0.286418	3.73216	0.000189844	0.0041531	2.38163	rpia
ENSDARG00000075354	31.8363	-1.1701	0.313674	-3.73031	0.000191243	0.00417449	2.3794	espl1
ENSDARG00000042876	70.2253	0.85777	0.230297	3.72463	0.000195602	0.00426025	2.37056	abracl
ENSDARG00000061764	360.781	-0.582574	0.156552	-3.72127	0.00019822	0.00430781	2.36574	-
ENSDARG00000054696	206.147	0.603927	0.162398	3.7188	0.000200173	0.00434074	2.36244	psmb4
ENSDARG00000059001	21.3551	1.46172	0.393424	3.71538	0.000202897	0.00439019	2.35752	pim2
ENSDARG00000032630	659.868	-0.648815	0.174735	-3.71314	0.000204704	0.00441964	2.35461	-
ENSDARG00000060113	23.0033	1.44561	0.389581	3.71068	0.0002067	0.00445303	2.35134	znf395a
ENSDARG00000015164	136.84	1.03621	0.279373	3.70905	0.000208039	0.00447216	2.34948	mknk2b
ENSDARG00000063899	1893.6	-0.568739	0.153608	-3.70254	0.000213451	0.00457857	2.33927	ND2
ENSDARG00000045367	119.368	0.847393	0.229039	3.69978	0.000215786	0.00461867	2.33548	tuba1b
ENSDARG00000041232	1862.76	0.574377	0.155844	3.6856	0.000228164	0.00487308	2.3122	rps29
ENSDARG00000052437	6.5412	1.87634	0.51045	3.67586	0.000237051	0.005052	2.29654	mia
ENSDARG00000095273	169.132	0.686529	0.187001	3.67126	0.000241359	0.00513277	2.28965	cox8a
ENSDARG00000101569	62.2123	-0.967864	0.263738	-3.6698	0.000242739	0.00515106	2.2881	ppargc1b
ENSDARG00000078250	39.7578	-1.10084	0.30002	-3.66922	0.000243291	0.00515175	2.28805	zgc:194398
ENSDARG00000101079	5.8078	-1.88323	0.513598	-3.66674	0.00024566	0.00519081	2.28476	hectd4
ENSDARG00000092170	1042.09	0.639787	0.174526	3.66586	0.000246506	0.00519761	2.2842	apoc1
ENSDARG00000036670	14.3129	1.65049	0.450372	3.66473	0.000247599	0.00520956	2.2832	aplnrb
ENSDARG00000003382	57.5224	0.925407	0.253166	3.65533	0.000256847	0.00535836	2.27097	cwc25
ENSDARG00000017891	110.875	0.747389	0.204495	3.65481	0.000257374	0.00535836	2.27097	tcp1
ENSDARG00000063535	516.565	-0.777628	0.21268	-3.65633	0.000255853	0.00535836	2.27097	chd4a
ENSDARG00000093584	136.278	0.741747	0.20294	3.65501	0.000257175	0.00535836	2.27097	zgc:193505
ENSDARG00000102746	31.5179	1.16745	0.319425	3.65487	0.000257317	0.00535836	2.27097	tmem39a
ENSDARG00000035882	21.1867	1.37733	0.377054	3.65287	0.000259324	0.00536615	2.27034	hrsp12
ENSDARG00000037285	8.9549	-1.72544	0.472412	-3.65241	0.000259793	0.00536615	2.27034	mipa
ENSDARG00000044422	22.4284	-1.49232	0.408599	-3.65229	0.000259914	0.00536615	2.27034	acvr2ba
ENSDARG00000058102	10.8303	1.69833	0.464833	3.65363	0.000258559	0.00536615	2.27034	sardh
ENSDARG00000101220	8.2051	-1.76555	0.483754	-3.64968	0.000262562	0.00540955	2.26684	polrmt
ENSDARG00000077872	6.34993	1.85519	0.509393	3.64195	0.000270577	0.00556311	2.25468	-
ENSDARG00000096257	127.715	-0.847552	0.232882	-3.6394	0.000273271	0.00560685	2.25128	-
ENSDARG00000039949	24.9666	1.34562	0.370222	3.63462	0.000278391	0.0057001	2.24412	fibina
ENSDARG00000061951	195.135	-0.688464	0.189457	-3.63387	0.0002792	0.00570489	2.24375	golgb1
ENSDARG00000009640	180.365	0.712466	0.19617	3.63188	0.000281365	0.00573731	2.24129	psmb1
ENSDARG00000008433	125.462	-0.842502	0.232344	-3.6261	0.000287737	0.00584317	2.23335	unc45b
ENSDARG00000055278	16.5301	1.41958	0.391476	3.62622	0.000287596	0.00584317	2.23335	cfb
ENSDARG00000055133	388.843	-0.604294	0.166679	-3.6255	0.000288403	0.00584472	2.23324	cenpf
ENSDARG00000052746	48.4152	1.33492	0.368435	3.62321	0.000290971	0.00588474	2.23027	grinab
ENSDARG00000092947	3294.32	0.644975	0.178045	3.62254	0.000291719	0.00588786	2.23004	cyt1
ENSDARG00000012682	392.084	-0.526889	0.145597	-3.61882	0.000295946	0.00596103	2.22468	pfn2l
ENSDARG00000056978	19.3028	-1.26798	0.350611	-3.61648	0.00029864	0.00600308	2.22163	letm1
ENSDARG00000055108	12.718	1.68761	0.466945	3.61414	0.000301344	0.00604517	2.21859	gde1
ENSDARG00000012002	8.74445	1.73939	0.481466	3.6127	0.000303029	0.0060667	2.21705	slc38a7
ENSDARG00000032458	27.9301	-1.22082	0.338149	-3.61032	0.000305823	0.0061103	2.21394	mark2b
ENSDARG00000017244	144.606	-0.737998	0.204467	-3.60937	0.000306945	0.00612038	2.21322	chd6
ENSDARG00000037860	215.302	0.550872	0.152668	3.6083	0.000308214	0.00613333	2.2123	cox6b2
ENSDARG00000089719	10.6816	-1.71102	0.474734	-3.60417	0.000313152	0.0062191	2.20627	si:dkey-108k21.11
ENSDARG00000088087	502.022	-0.495091	0.137423	-3.60267	0.000314966	0.00624262	2.20463	kdm6ba
ENSDARG00000101260	50.9709	0.980893	0.272544	3.59903	0.000319409	0.00631806	2.19942	gpatch2
ENSDARG00000070108	168.717	-0.613571	0.170688	-3.5947	0.000324771	0.00641132	2.19305	dek
ENSDARG00000017320	33.6314	1.08332	0.302209	3.58469	0.000337482	0.00664899	2.17724	f11r.1
ENSDARG00000062025	12.6117	-1.57378	0.439563	-3.58034	0.000343146	0.00674717	2.17088	cpox
ENSDARG00000078828	6.63798	-1.74196	0.486792	-3.57844	0.000345647	0.0067829	2.16858	npb
ENSDARG00000070289	8.37282	-1.79726	0.502775	-3.57468	0.000350654	0.00686755	2.1632	si:ch211-113a14.29
ENSDARG00000056322	83.8747	-0.778848	0.217972	-3.57316	0.000352699	0.00688041	2.16239	ldb3a
ENSDARG00000069122	24.3084	1.30435	0.364989	3.57366	0.000352027	0.00688041	2.16239	si:ch211-216l23.2
ENSDARG00000009733	16.3891	-1.42837	0.40012	-3.56985	0.000357189	0.0069271	2.15945	-
ENSDARG00000055360	111.963	0.866798	0.242809	3.56988	0.000357147	0.0069271	2.15945	llph
ENSDARG00000098836	8.30953	-1.70589	0.47779	-3.57038	0.000356468	0.0069271	2.15945	-
ENSDARG00000068432	493.821	-0.481123	0.135002	-3.56383	0.000365478	0.00707399	2.15034	si:dkey-56m19.5
ENSDARG00000093612	31.4553	-1.12385	0.315427	-3.56293	0.000366733	0.00708445	2.14969	si:dkey-92i17.2
ENSDARG00000032725	2690.36	0.570512	0.160356	3.55778	0.000374004	0.00721085	2.14201	rps27a
ENSDARG00000008170	47.5927	1.00495	0.282521	3.5571	0.000374969	0.00721543	2.14174	dbnla
ENSDARG00000034262	17.981	-1.30445	0.367804	-3.54658	0.000390271	0.00749532	2.12521	pld2
ENSDARG00000019530	191.191	-0.634352	0.178893	-3.54598	0.000391154	0.00749775	2.12507	hdgfrp2
ENSDARG00000028119	214.597	0.590058	0.166486	3.5442	0.000393811	0.0075341	2.12297	sumo3a
ENSDARG00000027750	21.0957	1.29269	0.365391	3.53783	0.000403433	0.00770332	2.11332	dpp7
ENSDARG00000021720	54.8032	-0.987781	0.279877	-3.52934	0.000416605	0.00793952	2.10021	col7a1
ENSDARG00000024295	27.3934	1.27295	0.360798	3.52816	0.000418465	0.00794443	2.09994	-
ENSDARG00000074645	12.0792	-1.48652	0.421315	-3.52829	0.000418247	0.00794443	2.09994	-
ENSDARG00000102307	53.505	-0.966469	0.274125	-3.52565	0.000422448	0.00800471	2.09665	taf2
ENSDARG00000055737	65.9206	-0.817502	0.231956	-3.52439	0.000424456	0.00802741	2.09542	ube3a
ENSDARG00000069118	67.1446	-0.851076	0.24166	-3.5218	0.000428634	0.00809097	2.092	ppp2r5eb
ENSDARG00000061660	8.01399	-1.78318	0.506516	-3.52049	0.000430752	0.00811549	2.09069	-
ENSDARG00000039263	11.5297	-1.49777	0.425513	-3.51992	0.000431677	0.00811749	2.09058	zbtb48
ENSDARG00000100596	38.9749	-1.26018	0.358088	-3.51918	0.00043288	0.0081247	2.09019	-
ENSDARG00000015978	260.993	0.575105	0.163535	3.51671	0.000436927	0.00818516	2.08697	zgc:86599
ENSDARG00000100259	9.2164	-1.57763	0.448728	-3.51578	0.000438464	0.00819845	2.08627	si:dkey-23a13.1
ENSDARG00000069828	7.55263	1.7556	0.499585	3.51411	0.000441226	0.00823455	2.08436	si:ch211-117n7.7
ENSDARG00000015759	121.05	0.866399	0.24734	3.50286	0.000460289	0.00857419	2.06681	tspan7
ENSDARG00000029019	27.4287	-1.12384	0.320982	-3.50124	0.000463097	0.00861031	2.06498	epb41b
ENSDARG00000003411	15.7401	1.44154	0.4124	3.49548	0.000473211	0.0087491	2.05804	foxa2
ENSDARG00000036895	14.3343	1.57133	0.449528	3.4955	0.000473172	0.0087491	2.05804	dap1b
ENSDARG00000040440	67.2818	0.882633	0.252491	3.4957	0.000472816	0.0087491	2.05804	snrpd2
ENSDARG00000011020	66.715	-0.91877	0.263535	-3.48632	0.000489707	0.00903724	2.04396	hnrnpa1a
ENSDARG00000039943	44.7791	1.15463	0.331431	3.48377	0.000494402	0.00909002	2.04143	fam46ba
ENSDARG00000078989	58.9186	-0.810372	0.232606	-3.48388	0.0004942	0.00909002	2.04143	alpk3a
ENSDARG00000074667	121.839	1.53215	0.440109	3.48129	0.000499005	0.00915767	2.03822	akt1s1
ENSDARG00000078733	13.1736	1.49908	0.430724	3.48037	0.000500714	0.00917204	2.03753	cnnm2b
ENSDARG00000040266	16.2241	1.33859	0.384818	3.4785	0.000504236	0.00921951	2.03529	sox19b
ENSDARG00000067717	30.0057	1.11619	0.320946	3.4778	0.000505545	0.00922643	2.03497	tomm7
ENSDARG00000005423	25.9073	1.12976	0.325195	3.4741	0.000512567	0.00932025	2.03057	pgam1a
ENSDARG00000013307	1731.3	0.551494	0.158724	3.47455	0.000511717	0.00932025	2.03057	rpl19
ENSDARG00000058105	2608.9	0.635243	0.182891	3.47335	0.00051401	0.00932937	2.03015	rpl36a
ENSDARG00000031774	17.49	1.29287	0.372996	3.46618	0.000527917	0.00956428	2.01935	pus7
ENSDARG00000051956	16.5843	-1.65534	0.477909	-3.46371	0.000532782	0.0096348	2.01616	isca1
ENSDARG00000098201	9.70273	-1.56398	0.451907	-3.46083	0.000538505	0.00972055	2.01231	mtmr3
ENSDARG00000040314	28.2909	1.30311	0.376614	3.46008	0.000540023	0.00973022	2.01188	psph
ENSDARG00000020043	27.2091	1.17334	0.339363	3.45748	0.000545258	0.00980672	2.00848	cnot8
ENSDARG00000016745	35.8331	0.992844	0.287215	3.4568	0.000546638	0.00980846	2.0084	slc35f6
ENSDARG00000021984	41.8188	0.97175	0.281151	3.45632	0.000547597	0.00980846	2.0084	ndufa2
ENSDARG00000040565	442.937	-0.620574	0.179579	-3.45571	0.000548849	0.00980846	2.0084	ckmb
ENSDARG00000052617	31.8805	1.05267	0.304639	3.45548	0.000549313	0.00980846	2.0084	raver1
ENSDARG00000042823	64.3349	0.980272	0.2839	3.45288	0.00055464	0.00988576	2.00499	-
ENSDARG00000002710	531.236	-0.567345	0.164707	-3.44456	0.000571986	0.0101584	1.99318	ncl
ENSDARG00000007867	71.3132	-0.766555	0.222518	-3.44491	0.00057126	0.0101584	1.99318	dazap2
ENSDARG00000058533	49.4284	-0.853931	0.247961	-3.44381	0.000573585	0.0101686	1.99274	pole
ENSDARG00000001857	64.9223	-0.77951	0.226464	-3.44209	0.000577247	0.010197	1.99153	aff4
ENSDARG00000073771	10.6674	-1.50935	0.438438	-3.44257	0.000576221	0.010197	1.99153	tbc1d12b
ENSDARG00000051775	5.65151	-1.7831	0.518899	-3.43631	0.000589689	0.0103983	1.98304	si:dkey-108k21.15; zgc:110434
ENSDARG00000078775	7.30266	-1.6835	0.490072	-3.43522	0.000592069	0.0104217	1.98206	rasa2
ENSDARG00000070098	87.6286	-0.70761	0.206257	-3.43073	0.000601961	0.010577	1.97564	lcorl
ENSDARG00000028327	41.8829	0.986378	0.287898	3.42613	0.000612239	0.0107386	1.96905	gmfb
ENSDARG00000093945	58.2891	0.9038	0.263941	3.42425	0.000616488	0.010794	1.96682	vma21
ENSDARG00000012688	283.835	0.616929	0.180324	3.42122	0.000623418	0.0108387	1.96502	eif1b
ENSDARG00000055510	18.1523	1.54095	0.450245	3.42247	0.000620552	0.0108387	1.96502	ypel3
ENSDARG00000056725	745.759	-0.491516	0.143635	-3.42199	0.00062165	0.0108387	1.96502	hmgb3a
ENSDARG00000069855	127.279	-0.730752	0.213588	-3.42131	0.000623203	0.0108387	1.96502	pnisr
ENSDARG00000033175	113.998	0.776408	0.227247	3.41658	0.000634131	0.0110057	1.95838	snrpe
ENSDARG00000062209	20.5661	-1.17973	0.345403	-3.41553	0.000636579	0.0110106	1.95819	mrps5
ENSDARG00000100679	7.35884	-1.66837	0.48847	-3.41551	0.000636636	0.0110106	1.95819	lrch3
ENSDARG00000007438	182.57	0.722688	0.211681	3.41405	0.000640052	0.0110504	1.95662	ube2ib
ENSDARG00000059711	40.9726	0.989112	0.290451	3.40543	0.000660599	0.0113853	1.94366	nol6
ENSDARG00000007320	1694.98	0.666038	0.195633	3.40453	0.000662776	0.0113934	1.94335	rpl7
ENSDARG00000008593	18.4393	-1.33785	0.392989	-3.40429	0.00066337	0.0113934	1.94335	nbas
ENSDARG00000069937	8.4016	-1.57498	0.462732	-3.40365	0.000664913	0.0114001	1.94309	dnm2a
ENSDARG00000033327	22.3732	-1.14805	0.337558	-3.40104	0.000671302	0.0114898	1.93969	unc5b
ENSDARG00000059475	28.3426	-1.046	0.307719	-3.3992	0.000675838	0.0115373	1.9379	camsap3
ENSDARG00000078878	31.8289	-1.31598	0.387169	-3.39897	0.000676404	0.0115373	1.9379	-
ENSDARG00000014790	53.4509	0.888337	0.261429	3.39801	0.000678791	0.0115581	1.93711	g3bp2
ENSDARG00000057782	310.445	-0.586355	0.172663	-3.39596	0.000683891	0.011625	1.93461	-
ENSDARG00000009871	102.917	0.682847	0.201256	3.39293	0.000691486	0.0117339	1.93056	snrpc
ENSDARG00000018840	26.9161	1.23813	0.365015	3.39199	0.000693875	0.0117368	1.93045	trpc4apa
ENSDARG00000074807	18.573	-1.23385	0.363761	-3.39193	0.000694022	0.0117368	1.93045	tbrg4
ENSDARG00000037281	26.5738	1.18031	0.348193	3.38983	0.000699369	0.0118071	1.92786	fgg
ENSDARG00000059109	36.9334	0.974833	0.287656	3.38888	0.000701778	0.0118276	1.9271	si:dkeyp-113d7.1
ENSDARG00000076239	46.6714	1.0577	0.312216	3.38773	0.000704745	0.0118574	1.92601	si:ch211-74f19.2
ENSDARG00000058679	14.5616	1.51675	0.447943	3.38603	0.000709105	0.0118904	1.9248	zgc:114104
ENSDARG00000096992	248.316	-0.575157	0.169852	-3.38622	0.000708618	0.0118904	1.9248	zgc:153405
ENSDARG00000011462	22.0959	1.19244	0.352427	3.38351	0.000715667	0.0119769	1.92166	otub1b
ENSDARG00000026634	70.631	-0.804379	0.237763	-3.38312	0.00071668	0.0119769	1.92166	ehmt1b
ENSDARG00000058451	3370.37	0.494501	0.146193	3.38252	0.00071823	0.0119826	1.92145	rpl6
ENSDARG00000006370	42.1328	0.96489	0.285538	3.37919	0.000726988	0.0121083	1.91692	atp6v1h
ENSDARG00000022129	209.084	0.681485	0.2019	3.37535	0.000737212	0.012223	1.91282	rbm4.3
ENSDARG00000055505	5.71601	1.73185	0.513106	3.37522	0.000737575	0.012223	1.91282	pdgfaa; LOC103909601
ENSDARG00000102015	113.239	-0.890563	0.263838	-3.37541	0.000737049	0.012223	1.91282	-
ENSDARG00000017661	16.0699	-1.27022	0.376699	-3.37197	0.000746335	0.0123476	1.90842	braf
ENSDARG00000001057	85.8434	0.796653	0.236344	3.37073	0.000749688	0.0123618	1.90792	bysl
ENSDARG00000013379	161.213	-0.57412	0.170325	-3.37074	0.000749678	0.0123618	1.90792	ppp6r3
ENSDARG00000042458	29.4944	1.05018	0.311657	3.36965	0.000752637	0.0123898	1.90694	-
ENSDARG00000020850	5337.87	0.556092	0.165102	3.36817	0.000756682	0.0124357	1.90533	eef1a1l1; eef1a1l2
ENSDARG00000090747	13.7175	-1.4663	0.43558	-3.36631	0.00076181	0.0124992	1.90312	si:ch73-269m14.2
ENSDARG00000078722	15.3508	-1.34272	0.399012	-3.36512	0.000765116	0.0125327	1.90195	clip1a
ENSDARG00000020708	116.208	0.690071	0.20524	3.36226	0.000773059	0.0126419	1.89819	mdkb
ENSDARG00000009689	84.995	-0.732327	0.217878	-3.36118	0.000776112	0.0126501	1.89791	daam1b
ENSDARG00000012519	126.79	-0.680707	0.202508	-3.36138	0.000775529	0.0126501	1.89791	hcfc1b
ENSDARG00000075542	232.896	-0.586154	0.174445	-3.36012	0.000779097	0.0126779	1.89695	zfhx4
ENSDARG00000036549	58.8641	-0.77695	0.231306	-3.35898	0.000782316	0.0127094	1.89587	agpat3
ENSDARG00000003487	72.2473	0.754509	0.225015	3.35316	0.000798956	0.0129585	1.88744	nup93
ENSDARG00000008735	26.0607	1.16554	0.347706	3.35208	0.000802061	0.0129876	1.88647	atp6ap2
ENSDARG00000103390	24.4857	-1.15273	0.343939	-3.35156	0.000803574	0.0129909	1.88636	cacna2d2a
ENSDARG00000032103	33.6341	-1.16821	0.34869	-3.35027	0.000807326	0.0130303	1.88505	mapk6
ENSDARG00000022978	34.1707	-1.04845	0.313175	-3.3478	0.000814558	0.0131195	1.88208	tmpob
ENSDARG00000045269	50.288	-0.877873	0.262249	-3.34748	0.000815502	0.0131195	1.88208	-
ENSDARG00000004132	69.7561	-0.748317	0.2237	-3.34518	0.000822291	0.0131767	1.88019	usp19
ENSDARG00000018882	29.2359	1.07059	0.319977	3.34582	0.00082039	0.0131767	1.88019	jak2b
ENSDARG00000039343	45.6112	-0.915625	0.273809	-3.34403	0.000825703	0.0131767	1.88019	ahcyl2
ENSDARG00000052082	48.0974	0.914622	0.273477	3.34442	0.000824535	0.0131767	1.88019	gabarapb
ENSDARG00000077057	23.2042	-1.12713	0.337038	-3.34423	0.000825124	0.0131767	1.88019	esco1
ENSDARG00000089331	4.9286	1.76695	0.528563	3.34294	0.000828969	0.0132075	1.87918	urahb
ENSDARG00000034823	31.6241	1.03079	0.308579	3.34044	0.000836458	0.0132417	1.87806	copg2
ENSDARG00000088581	11.8158	1.49032	0.446053	3.34113	0.000834382	0.0132417	1.87806	f10
ENSDARG00000098852	15.5571	1.35433	0.405419	3.34056	0.000836083	0.0132417	1.87806	smdt1b
ENSDARG00000098932	92.382	-0.74053	0.221677	-3.34057	0.000836053	0.0132417	1.87806	gigyf1a
ENSDARG00000035136	106.493	0.669697	0.200769	3.33567	0.000850951	0.0134496	1.87129	sepw1
ENSDARG00000056078	15.1003	1.41973	0.425734	3.33479	0.000853653	0.0134709	1.8706	rftn2
ENSDARG00000103417	19.5441	1.28697	0.386311	3.33142	0.000864039	0.0136131	1.86604	-
ENSDARG00000040286	25.7046	1.10649	0.332274	3.33005	0.000868292	0.0136584	1.8646	ubl7b
ENSDARG00000021193	101.554	-0.687573	0.206622	-3.32769	0.000875691	0.0137529	1.8616	coro1cb
ENSDARG00000016651	178.879	-0.69982	0.210609	-3.32284	0.000891064	0.0139501	1.85542	znf106a
ENSDARG00000074390	11.9225	1.44557	0.434982	3.32328	0.000889659	0.0139501	1.85542	tmem176l.4
ENSDARG00000006128	58.5818	-0.780907	0.235149	-3.3209	0.000897275	0.0140252	1.85309	cep170aa
ENSDARG00000004427	35.9844	1.26914	0.382321	3.31956	0.0009016	0.0140447	1.85249	dpy30
ENSDARG00000042777	76.6898	0.72341	0.217934	3.3194	0.000902114	0.0140447	1.85249	ndufa11
ENSDARG00000060494	141.063	-0.633327	0.190807	-3.31919	0.000902774	0.0140447	1.85249	eprs
ENSDARG00000098583	61.1285	1.00359	0.302468	3.31801	0.000906615	0.0140824	1.85132	wbp1
ENSDARG00000020298	86.0933	0.724857	0.218499	3.31745	0.000908444	0.0140887	1.85113	btg2
ENSDARG00000020841	22.0108	1.25132	0.3773	3.31651	0.000911486	0.0141138	1.85036	rbm7
ENSDARG00000042566	1256.29	0.558773	0.168574	3.3147	0.000917409	0.0141833	1.84822	rps7
ENSDARG00000036754	94.9647	-0.631552	0.190734	-3.31117	0.000929072	0.0143413	1.84341	hmgn3
ENSDARG00000059367	52.1214	0.979181	0.295961	3.30847	0.000938059	0.0144575	1.83991	mfap2
ENSDARG00000054304	40.7172	-1.02973	0.311542	-3.30527	0.000948861	0.0146013	1.83561	homeza
ENSDARG00000010113	114.448	0.720456	0.218542	3.29665	0.000978454	0.0149239	1.82612	ndufb8
ENSDARG00000010784	105.345	-0.718516	0.217961	-3.29653	0.000978865	0.0149239	1.82612	ppp1r12a
ENSDARG00000069808	13.7937	1.4095	0.42755	3.29668	0.000978355	0.0149239	1.82612	ostm1
ENSDARG00000074183	10.134	1.56822	0.475614	3.29725	0.000976361	0.0149239	1.82612	si:dkey-172j4.3
ENSDARG00000100452	248.686	0.593351	0.179956	3.29721	0.000976515	0.0149239	1.82612	nop53
ENSDARG00000101120	12.9579	-1.38068	0.418782	-3.2969	0.000977571	0.0149239	1.82612	kif3b
ENSDARG00000070228	41.3972	-1.06903	0.324335	-3.29606	0.000980514	0.0149261	1.82605	cdk6
ENSDARG00000102879	116.383	-0.758893	0.230356	-3.29444	0.000986177	0.0149893	1.82422	myt1b
ENSDARG00000054154	172.488	-0.601546	0.182705	-3.29244	0.000993206	0.015073	1.8218	bms1
ENSDARG00000037488	344.485	-0.546916	0.166374	-3.28727	0.00101165	0.0153294	1.81447	canx
ENSDARG00000030716	86.4907	0.90681	0.275903	3.2867	0.00101368	0.0153368	1.81427	ing4
ENSDARG00000011201	3658.25	0.498374	0.151705	3.28516	0.00101923	0.0153973	1.81256	rplp2l
ENSDARG00000103415	93.6975	0.815024	0.24836	3.28163	0.0010321	0.0155679	1.80777	-
ENSDARG00000078604	23.8916	-1.15601	0.3524	-3.28039	0.00103663	0.0156125	1.80653	-
ENSDARG00000098059	140.516	0.719348	0.219381	3.279	0.00104177	0.0156661	1.80504	-
ENSDARG00000013478	77.1448	0.744928	0.227259	3.27788	0.00104591	0.0157045	1.80398	rrp15
ENSDARG00000017454	77.8536	0.756434	0.231026	3.27423	0.00105949	0.0158844	1.79903	nup50
ENSDARG00000009106	176.453	0.622314	0.190557	3.26575	0.00109173	0.0163429	1.78667	serinc1
ENSDARG00000004537	145.5	-0.698316	0.213887	-3.26489	0.00109508	0.0163684	1.78599	kmt2a
ENSDARG00000075622	62.801	0.904048	0.277191	3.26147	0.00110837	0.0165422	1.78141	zgc:174938
ENSDARG00000017843	102.111	0.704551	0.216477	3.25463	0.00113541	0.0169202	1.77159	-
ENSDARG00000017140	54.543	0.852336	0.262196	3.25076	0.00115095	0.0171247	1.76638	zgc:63587
ENSDARG00000102978	56.9027	0.806587	0.248153	3.25036	0.00115259	0.0171247	1.76638	eif4a3
ENSDARG00000057882	54.6901	0.903327	0.278045	3.24885	0.00115873	0.0171901	1.76472	arpc3
ENSDARG00000009253	43.7495	0.911686	0.280769	3.2471	0.00116586	0.01727	1.76271	zgc:56576
ENSDARG00000029500	1086.42	0.598851	0.184512	3.24559	0.00117208	0.017333	1.76113	rpl34
ENSDARG00000040110	98.5504	-0.667872	0.205802	-3.24522	0.00117361	0.017333	1.76113	kif20bb
ENSDARG00000091902	20.5815	1.19564	0.369019	3.24005	0.00119508	0.0176239	1.7539	b3gnt2b
ENSDARG00000077536	134.897	-0.609911	0.188293	-3.23917	0.00119879	0.0176523	1.7532	snrnp200
ENSDARG00000043128	30.3652	0.989083	0.305495	3.23764	0.00120523	0.0177018	1.75198	cldne
ENSDARG00000044212	15.4431	-1.33087	0.411088	-3.23743	0.00120611	0.0177018	1.75198	-
ENSDARG00000074844	8.98652	1.54012	0.475772	3.2371	0.00120751	0.0177018	1.75198	-
ENSDARG00000086746	28.7242	-1.1002	0.340318	-3.23286	0.00122559	0.0179362	1.74627	prodha
ENSDARG00000092726	8.88341	1.52776	0.472623	3.2325	0.00122712	0.0179362	1.74627	-
ENSDARG00000007024	14.9306	1.53332	0.474489	3.23153	0.00123131	0.017971	1.74543	-
ENSDARG00000071467	46.7451	-0.826794	0.255917	-3.23071	0.00123481	0.0179956	1.74483	zbtb33
ENSDARG00000016427	21.6209	1.22335	0.378968	3.2281	0.00124617	0.0181345	1.7415	fignl1
ENSDARG00000036041	28.0644	1.163	0.360375	3.2272	0.00125009	0.0181648	1.74077	f2
ENSDARG00000057317	407.102	-0.471152	0.146062	-3.22569	0.00125669	0.018234	1.73912	-
ENSDARG00000024278	46.9064	0.915027	0.283725	3.22505	0.0012595	0.0182481	1.73878	adh8b
ENSDARG00000104068	36.3205	1.0465	0.32465	3.22347	0.00126649	0.0183226	1.73701	gstp1
ENSDARG00000068503	16.7181	1.2989	0.403419	3.21972	0.00128316	0.0185366	1.73197	gbgt1l4
ENSDARG00000062338	63.7322	-0.925052	0.287623	-3.2162	0.00129901	0.018711	1.7279	zeb2a
ENSDARG00000074131	76.7361	-0.839564	0.261015	-3.21654	0.00129748	0.018711	1.7279	-
ENSDARG00000056480	29.9719	1.19651	0.37229	3.21391	0.00130939	0.0188332	1.72508	cpvl
ENSDARG00000008969	39.4641	0.921645	0.286884	3.2126	0.00131539	0.018892	1.72372	fgb
ENSDARG00000011701	47.7999	0.926591	0.288556	3.21113	0.00132213	0.0189613	1.72213	ctsll
ENSDARG00000045853	21.6377	-1.11597	0.347593	-3.21057	0.0013247	0.0189708	1.72191	rad51ap1
ENSDARG00000041481	46.547	-0.925908	0.288548	-3.20885	0.00133268	0.0190576	1.71993	smg5
ENSDARG00000000503	122.33	-0.586784	0.182896	-3.2083	0.00133523	0.0190665	1.71973	stx1b
ENSDARG00000001431	76.3798	-0.702548	0.219134	-3.20602	0.00134586	0.0191906	1.71691	actn3b
ENSDARG00000102081	27.7662	-1.12836	0.352186	-3.20388	0.00135589	0.0193058	1.71431	mprip
ENSDARG00000039576	168.082	0.622572	0.194504	3.20082	0.00137035	0.0194559	1.71095	fstl1b
ENSDARG00000080010	86.7282	0.842497	0.263202	3.20095	0.00136975	0.0194559	1.71095	adh5
ENSDARG00000074340	284.952	0.547228	0.171014	3.1999	0.00137474	0.0194902	1.71018	serf2
ENSDARG00000004748	9.33299	1.50319	0.470024	3.19812	0.00138327	0.0195552	1.70874	zgc:100868
ENSDARG00000055216	485.769	0.623548	0.194949	3.19852	0.00138134	0.0195552	1.70874	tuba1c
ENSDARG00000074703	17.7489	1.26589	0.396041	3.19636	0.00139172	0.0196466	1.70671	ccdc97
ENSDARG00000101423	19.3894	1.19059	0.37254	3.19588	0.00139404	0.0196514	1.70661	cyp2y3
ENSDARG00000056378	14.5885	1.32287	0.414142	3.19425	0.00140197	0.0197351	1.70476	ifi30
ENSDARG00000003132	17.1828	1.31976	0.413589	3.19099	0.00141785	0.0198905	1.70135	apip
ENSDARG00000077353	107.58	-0.659225	0.206631	-3.19034	0.00142103	0.0198905	1.70135	rerea
ENSDARG00000086591	45.9666	-0.937071	0.293704	-3.19053	0.00142012	0.0198905	1.70135	LOC108179079; si:ch211-113a14.11
ENSDARG00000105590	56.2703	0.801074	0.251068	3.19067	0.00141943	0.0198905	1.70135	si:cabz01007794.1
ENSDARG00000016889	109.445	0.770568	0.241612	3.18928	0.00142627	0.0199143	1.70084	eif3g
ENSDARG00000036784	12.0141	1.37542	0.431306	3.18896	0.00142785	0.0199143	1.70084	commd7
ENSDARG00000087616	154.23	0.74201	0.232694	3.18878	0.00142876	0.0199143	1.70084	maptb
ENSDARG00000023082	15.6423	1.26409	0.396681	3.18668	0.00143918	0.0200312	1.69829	krt1-19d
ENSDARG00000070437	1124.55	0.591398	0.185659	3.18539	0.00144557	0.0200921	1.69698	rpl22
ENSDARG00000057940	396.952	-0.510575	0.160328	-3.18457	0.0014497	0.0201212	1.69635	dido1
ENSDARG00000011175	67.8428	0.79637	0.250456	3.17967	0.00147441	0.0204355	1.68962	atp6v1d
ENSDARG00000030756	88.0838	-0.692412	0.21779	-3.17926	0.00147653	0.0204363	1.6896	dnmt1
ENSDARG00000071863	14.2272	-1.32374	0.417105	-3.17363	0.00150546	0.0208077	1.68178	itgb1a
ENSDARG00000074531	18.1437	-1.22172	0.385387	-3.17011	0.00152381	0.021032	1.67712	spag9a
ENSDARG00000103893	64.1826	-0.783567	0.247205	-3.1697	0.00152596	0.0210324	1.67711	srsf2b
ENSDARG00000036826	5.69569	-1.62097	0.511876	-3.16673	0.00154164	0.0211895	1.67388	ankrd52a
ENSDARG00000045776	226.876	-0.504607	0.159344	-3.16677	0.00154143	0.0211895	1.67388	cnbpa
ENSDARG00000091905	28.2051	-1.35694	0.428668	-3.16548	0.00154829	0.0212514	1.67261	si:dkey-108k21.21
ENSDARG00000105037	388.612	0.45081	0.142557	3.16231	0.0015652	0.0214539	1.66849	snrpf
ENSDARG00000067817	27.6748	1.19485	0.377937	3.16152	0.00156948	0.0214829	1.66791	-
ENSDARG00000030913	63.7375	-0.741183	0.234494	-3.16078	0.00157349	0.0214928	1.66771	cluha
ENSDARG00000104701	64.8658	-0.77311	0.24461	-3.16058	0.00157455	0.0214928	1.66771	map7d1b
ENSDARG00000010052	34.7164	1.02127	0.323307	3.15883	0.00158405	0.0215928	1.66569	ndrg3b
ENSDARG00000044669	309.993	0.539967	0.170971	3.15825	0.00158722	0.0216062	1.66542	hp1bp3
ENSDARG00000077545	14.2918	-1.26228	0.399872	-3.15672	0.00159553	0.0216896	1.66375	si:dkey-16p21.7
ENSDARG00000099139	40.8932	-0.89544	0.283837	-3.15477	0.00160627	0.0218057	1.66143	fbxw5
ENSDARG00000068650	23.1398	-1.05497	0.334579	-3.15312	0.00161537	0.0218394	1.66076	fam214b
ENSDARG00000070448	52.3944	-0.834685	0.26467	-3.15368	0.00161224	0.0218394	1.66076	grk4
ENSDARG00000098105	17.416	1.21232	0.384479	3.15315	0.0016152	0.0218394	1.66076	tmem106c
ENSDARG00000076939	26.4405	1.08327	0.34384	3.15051	0.00162987	0.0220021	1.65754	znf451
ENSDARG00000098646	37.9987	1.05042	0.333449	3.15015	0.00163184	0.0220021	1.65754	mthfd2
ENSDARG00000024160	66.8809	0.780528	0.248078	3.1463	0.00165349	0.0222335	1.65299	hao1
ENSDARG00000105393	17.0875	-1.37781	0.437866	-3.14665	0.00165155	0.0222335	1.65299	si:ch1073-159d7.6; zgc:112234
ENSDARG00000074758	775.774	-0.518161	0.164725	-3.14561	0.00165743	0.0222562	1.65255	csde1
ENSDARG00000007323	76.2058	0.681985	0.216851	3.14495	0.00166114	0.022276	1.65216	chmp4bb
ENSDARG00000042799	17.1908	-1.39019	0.442149	-3.14417	0.00166559	0.0223054	1.65159	atpaf1
ENSDARG00000061804	5.32492	-1.604	0.510599	-3.1414	0.00168143	0.0224568	1.64865	si:ch211-194e15.5
ENSDARG00000074306	6.44574	1.61905	0.515343	3.14169	0.00167975	0.0224568	1.64865	wu:fa26c03
ENSDARG00000027529	13.2538	1.39358	0.444018	3.13856	0.00169779	0.0226448	1.64503	hmox1a
ENSDARG00000037259	28.882	1.06083	0.338316	3.13564	0.00171482	0.0228412	1.64128	ndufb6
ENSDARG00000100376	6.01797	1.6009	0.511052	3.13256	0.0017329	0.0230511	1.63731	amdhd2
ENSDARG00000028017	33.1603	1.10817	0.353915	3.13118	0.00174105	0.0230975	1.63643	tp53inp1
ENSDARG00000057403	15.6545	-1.25348	0.400302	-3.13133	0.00174017	0.0230975	1.63643	-
ENSDARG00000007787	5.72641	-1.6418	0.524665	-3.12923	0.00175262	0.0232199	1.63414	zgc:112965
ENSDARG00000080019	13.3298	-1.30369	0.416823	-3.12769	0.00176187	0.0233113	1.63243	si:dkey-82j4.2
ENSDARG00000013670	62.0003	-0.739229	0.236463	-3.12619	0.00177088	0.0233917	1.63094	hyou1
ENSDARG00000054814	68.0991	-0.838981	0.268397	-3.12589	0.00177267	0.0233917	1.63094	si:ch211-251p5.5
ENSDARG00000037503	380.044	-0.431707	0.138159	-3.12471	0.00177981	0.0234546	1.62977	thoc2
ENSDARG00000038835	147.673	0.64958	0.207952	3.1237	0.00178593	0.0234852	1.62921	ppid
ENSDARG00000058448	41.9815	-0.858858	0.274963	-3.12354	0.00178687	0.0234852	1.62921	zrsr2
ENSDARG00000062646	8.9858	-1.51519	0.485192	-3.12287	0.00179095	0.0235078	1.62879	-
ENSDARG00000044684	17.0174	1.3654	0.437883	3.11818	0.00181969	0.0238533	1.62245	rbp4l
ENSDARG00000014804	4.90895	-1.59241	0.510923	-3.11674	0.00182866	0.0238762	1.62204	cacna2d1a
ENSDARG00000015536	163.101	-0.550306	0.176557	-3.11687	0.00182781	0.0238762	1.62204	sox6
ENSDARG00000019808	257.255	-0.512131	0.164277	-3.11748	0.00182405	0.0238762	1.62204	evpla
ENSDARG00000052073	97.2226	0.758797	0.24351	3.11609	0.00183268	0.0238972	1.62165	blcap
ENSDARG00000033012	89.5456	-0.771867	0.247888	-3.11377	0.00184711	0.0240222	1.61939	pcnt
ENSDARG00000056314	28.2462	1.06245	0.341192	3.11394	0.00184609	0.0240222	1.61939	a2ml
ENSDARG00000013397	24.2502	-1.08558	0.348808	-3.11226	0.00185659	0.0241138	1.61773	bnip2
ENSDARG00000077717	1964.32	0.658475	0.211884	3.10771	0.00188541	0.024456	1.61161	rpl29
ENSDARG00000015610	60.2046	0.807206	0.25987	3.10618	0.00189519	0.0245039	1.61076	tubg1
ENSDARG00000070568	141.938	-0.6385	0.205538	-3.10648	0.0018933	0.0245039	1.61076	atad5a
ENSDARG00000078882	10.9111	1.42463	0.458673	3.10598	0.00189652	0.0245039	1.61076	slc22a31
ENSDARG00000038424	31.0942	1.00424	0.323373	3.10551	0.00189951	0.0245106	1.61065	si:dkey-8k3.2
ENSDARG00000055504	26.5571	1.16057	0.373896	3.10398	0.00190937	0.0245775	1.60946	si:ch211-212k18.7
ENSDARG00000104373	263.709	1.12309	0.361827	3.10394	0.00190965	0.0245775	1.60946	si:zfos-932h1.6
ENSDARG00000044436	17.705	-1.10548	0.356334	-3.10237	0.00191976	0.0246755	1.60773	rps6ka4
ENSDARG00000008867	132.501	-0.558854	0.180283	-3.09987	0.00193608	0.024853	1.60462	rap1b
ENSDARG00000012078	227.173	-0.503298	0.162515	-3.09693	0.00195535	0.0250438	1.6013	meis1b
ENSDARG00000037870	1688.03	0.538861	0.174004	3.09683	0.00195599	0.0250438	1.6013	actb2
ENSDARG00000078887	6.32638	-1.50295	0.485536	-3.09544	0.00196519	0.0251291	1.59982	atp10d
ENSDARG00000063626	205.727	0.793025	0.256223	3.09505	0.00196778	0.0251298	1.59981	ddx21
ENSDARG00000007791	102.878	0.71905	0.232622	3.09107	0.00199437	0.0254039	1.5951	ppp2r1ba
ENSDARG00000098695	88.8026	-0.642458	0.207824	-3.09135	0.00199249	0.0254039	1.5951	-
ENSDARG00000102741	208.942	0.559832	0.181212	3.08938	0.00200574	0.0255159	1.59319	sumo2b
ENSDARG00000015472	74.4171	-0.83986	0.272014	-3.08756	0.0020181	0.0256402	1.59108	gpc4
ENSDARG00000076870	29.0179	-0.998011	0.323328	-3.08669	0.00202402	0.0256728	1.59053	piezo1
ENSDARG00000100354	58.6757	0.839494	0.271996	3.08642	0.00202585	0.0256728	1.59053	-
ENSDARG00000013708	150.242	-0.54223	0.175974	-3.08131	0.00206093	0.0260841	1.58362	usp9
ENSDARG00000100666	116.617	-0.610758	0.19824	-3.0809	0.00206379	0.026087	1.58358	ep300a
ENSDARG00000074979	88.6778	-0.65469	0.212528	-3.08048	0.00206666	0.0260899	1.58353	larp4ab
ENSDARG00000071549	13.6295	-1.28133	0.416004	-3.08008	0.00206942	0.0260915	1.5835	ecm2
ENSDARG00000001913	41.0834	-0.913579	0.297161	-3.07436	0.00210955	0.02653	1.57626	palmda
ENSDARG00000102365	14.3163	-1.29683	0.421822	-3.07436	0.00210951	0.02653	1.57626	-
ENSDARG00000010878	77.5324	0.686094	0.223232	3.07345	0.00211596	0.0265313	1.57624	cdkn1ca
ENSDARG00000077229	8.94249	-1.39996	0.455536	-3.07321	0.00211769	0.0265313	1.57624	ano8b
ENSDARG00000079017	16.0132	-1.24561	0.405242	-3.07373	0.00211398	0.0265313	1.57624	tlnrd1
ENSDARG00000029556	57.5629	0.870533	0.283629	3.06927	0.00214584	0.0268501	1.57105	kansl3
ENSDARG00000038312	30.0823	0.937348	0.305558	3.06766	0.00215744	0.0269612	1.56926	rcl1
ENSDARG00000073786	8.21264	1.4986	0.488717	3.0664	0.00216656	0.027041	1.56798	cmbl
ENSDARG00000031495	741.305	-0.408057	0.133121	-3.0653	0.0021745	0.0270719	1.56748	seta
ENSDARG00000035914	61.0049	0.858765	0.280138	3.06551	0.00217298	0.0270719	1.56748	tmem167a
ENSDARG00000000212	71.1334	-0.977138	0.318855	-3.06452	0.00218017	0.0271085	1.56689	krt97
ENSDARG00000061736	57.0285	-0.722439	0.235825	-3.06345	0.00218801	0.027172	1.56588	ank3a
ENSDARG00000036028	12.319	1.36886	0.446915	3.06292	0.0021919	0.0271861	1.56565	arrdc3b
ENSDARG00000061379	35.6173	-1.14706	0.374554	-3.06248	0.00219515	0.0271924	1.56555	cmya5
ENSDARG00000102850	17.3902	1.19743	0.391452	3.05894	0.00222123	0.0274812	1.56096	-
ENSDARG00000005513	765.301	0.538408	0.176283	3.05422	0.00225644	0.0278726	1.55482	naca
ENSDARG00000017500	53.6414	-0.823056	0.269531	-3.05366	0.00226072	0.0278726	1.55482	rock2a
ENSDARG00000103774	32.8315	0.969962	0.317648	3.05358	0.00226131	0.0278726	1.55482	limch1b
ENSDARG00000042864	44.5446	0.834202	0.273264	3.05274	0.00226765	0.0278994	1.55441	rpl7l1
ENSDARG00000104375	57.7678	0.829632	0.271784	3.05254	0.00226911	0.0278994	1.55441	sec24a
ENSDARG00000031907	90.6151	0.682786	0.223755	3.05149	0.0022771	0.0279452	1.55369	ptbp1b
ENSDARG00000052244	156.485	-0.650061	0.213133	-3.05003	0.00228822	0.0279452	1.55369	zgc:158564
ENSDARG00000060004	76.211	0.68981	0.226102	3.05088	0.00228172	0.0279452	1.55369	fzd7a
ENSDARG00000071496	9.9397	1.4018	0.459633	3.04982	0.00228976	0.0279452	1.55369	zic6
ENSDARG00000098880	12.4631	-1.2515	0.4103	-3.05021	0.00228678	0.0279452	1.55369	pclob
ENSDARG00000102452	190.425	0.765664	0.250985	3.05063	0.00228358	0.0279452	1.55369	eif3ha
ENSDARG00000008292	132.294	0.618698	0.202949	3.04854	0.00229954	0.0280301	1.55238	eif2s3
ENSDARG00000018312	7.54834	-1.41601	0.464884	-3.04594	0.00231954	0.0282391	1.54915	rell1
ENSDARG00000041108	23.9897	1.04793	0.344315	3.04353	0.00233821	0.0284314	1.5462	ctsh
ENSDARG00000100143	16.2169	1.19406	0.392612	3.04131	0.00235551	0.0286067	1.54353	-
ENSDARG00000004939	123.63	-0.64154	0.211126	-3.03866	0.00237634	0.0288244	1.54024	mtdhb
ENSDARG00000053569	390.08	0.5226	0.17214	3.03591	0.0023981	0.0290527	1.53681	sox3
ENSDARG00000092673	17.135	-1.1978	0.394666	-3.03497	0.00240557	0.0291077	1.53599	-
ENSDARG00000036329	74.0416	0.788033	0.260018	3.03069	0.00243996	0.0294878	1.53036	ndufa1
ENSDARG00000018476	177.754	-0.519734	0.171556	-3.02953	0.00244936	0.0295654	1.52922	pak2b
ENSDARG00000037478	9.9036	1.4805	0.488947	3.02794	0.0024623	0.0295896	1.52886	cdh8
ENSDARG00000056929	204.934	-0.501678	0.165642	-3.02869	0.00245617	0.0295896	1.52886	kdm6bb
ENSDARG00000061862	185.222	-0.562346	0.185705	-3.02818	0.00246033	0.0295896	1.52886	-
ENSDARG00000104839	12.4825	1.41291	0.466643	3.02781	0.00246331	0.0295896	1.52886	mansc1
ENSDARG00000022232	100.614	-0.590695	0.195172	-3.02654	0.00247374	0.0296789	1.52755	ppan
ENSDARG00000042684	27.1607	1.02518	0.338855	3.02541	0.00248298	0.0297537	1.52646	serpinc1
ENSDARG00000008049	46.7766	0.966214	0.31943	3.02481	0.0024879	0.0297767	1.52612	si:dkey-42i9.4
ENSDARG00000086950	35.8974	0.951306	0.314698	3.02292	0.00250352	0.0299275	1.52393	-
ENSDARG00000006316	2457.06	0.474558	0.157045	3.0218	0.00251279	0.0300021	1.52285	rpl23a
ENSDARG00000081303	10.5416	1.38081	0.457614	3.0174	0.0025495	0.0304037	1.51707	-
ENSDARG00000041592	17.795	1.22341	0.405594	3.01633	0.00255851	0.0304379	1.51658	dcun1d2b
ENSDARG00000093374	35.3486	-1.04642	0.346895	-3.01653	0.00255687	0.0304379	1.51658	-
ENSDARG00000099722	14.6163	-1.22088	0.40535	-3.01191	0.00259613	0.0308485	1.51077	zgc:153993
ENSDARG00000034146	37.9044	0.912322	0.302946	3.0115	0.0025996	0.0308528	1.51071	ccnk
ENSDARG00000015851	100.35	-0.680856	0.226216	-3.00976	0.00261453	0.030882	1.51029	pnn
ENSDARG00000032553	21.4365	1.58043	0.52502	3.01022	0.00261057	0.030882	1.51029	egln3
ENSDARG00000096249	20.3799	-1.11833	0.371531	-3.01005	0.00261203	0.030882	1.51029	ap1m1
ENSDARG00000098432	66.6181	0.702882	0.233472	3.01056	0.00260768	0.030882	1.51029	-
ENSDARG00000020890	53.3014	0.779962	0.259188	3.00925	0.0026189	0.0308968	1.51009	tmod4
ENSDARG00000003866	49.8539	-0.820964	0.272937	-3.00789	0.00263065	0.0309985	1.50866	tm9sf2
ENSDARG00000103057	260.947	-0.540502	0.179722	-3.00743	0.0026347	0.0310094	1.50851	-
ENSDARG00000030949	59.1871	0.816127	0.271494	3.00605	0.00264661	0.0311126	1.50706	srprb
ENSDARG00000013655	57.9691	0.954174	0.317553	3.00478	0.00265777	0.0312068	1.50575	tpd52l2b
ENSDARG00000036830	39.8478	0.912959	0.303922	3.00393	0.00266519	0.0312568	1.50506	krt91
ENSDARG00000030786	36.0672	0.983574	0.327502	3.00326	0.00267102	0.0312882	1.50462	mpi
ENSDARG00000041974	67.693	0.770236	0.256585	3.00188	0.00268318	0.0313935	1.50316	brk1
ENSDARG00000002589	299.701	-0.541438	0.180502	-2.99962	0.00270314	0.0315897	1.50045	mylpfb
ENSDARG00000015907	36.5887	0.878398	0.293043	2.9975	0.00272199	0.0317495	1.49826	dcbld1
ENSDARG00000019765	184.285	0.554879	0.185122	2.99737	0.00272322	0.0317495	1.49826	zgc:158803
ENSDARG00000103598	24.0641	1.0816	0.36112	2.99512	0.00274334	0.0319465	1.49558	siva1
ENSDARG00000052556	12.3373	-1.31085	0.438597	-2.98872	0.00280147	0.0325469	1.48749	fgfrl1b
ENSDARG00000053803	78.4376	-0.794004	0.265666	-2.98873	0.00280138	0.0325469	1.48749	klhl43
ENSDARG00000073841	59.3929	-0.799442	0.267533	-2.98819	0.00280632	0.0325651	1.48725	herc2
ENSDARG00000051783	2811.4	0.546409	0.182902	2.98744	0.00281327	0.0326076	1.48668	rplp0
ENSDARG00000100392	3260.23	0.6058	0.203138	2.98221	0.00286179	0.0331312	1.47976	-
ENSDARG00000007127	10.4303	1.37078	0.45977	2.98144	0.00286894	0.0331753	1.47919	acat2
ENSDARG00000079317	108.347	-0.687764	0.23095	-2.97798	0.00290159	0.0335137	1.47478	dlc1
ENSDARG00000088178	76.8576	0.641528	0.215551	2.97622	0.00291824	0.0336667	1.4728	tp53inp2
ENSDARG00000058047	68.2417	0.776732	0.261145	2.97433	0.00293629	0.0338003	1.47108	pafah1b3
ENSDARG00000076357	4.91034	-1.53867	0.517322	-2.97429	0.00293664	0.0338003	1.47108	-
ENSDARG00000102907	6.12325	1.54379	0.519252	2.9731	0.00294805	0.0338923	1.4699	-
ENSDARG00000057903	232.297	-0.472027	0.158791	-2.97263	0.00295265	0.0339059	1.46973	-
ENSDARG00000005251	37.286	0.836212	0.281659	2.96888	0.00298885	0.0342818	1.46494	rpe
ENSDARG00000060001	9.80338	1.37482	0.463391	2.96686	0.00300856	0.0344283	1.46309	mettl9
ENSDARG00000060785	6.13578	1.50209	0.506274	2.96696	0.00300765	0.0344283	1.46309	pcnxl4
ENSDARG00000018985	25.9654	1.21648	0.410224	2.9654	0.00302292	0.0345526	1.46152	gatsl2
ENSDARG00000040002	16.603	1.24234	0.419002	2.96501	0.00302676	0.0345566	1.46147	pnpla7b
ENSDARG00000069342	71.0328	-0.706874	0.238448	-2.96448	0.00303191	0.0345756	1.46123	zgc:153115
ENSDARG00000058231	33.0938	-0.945524	0.319202	-2.96215	0.00305498	0.0346791	1.45993	nt5c2b
ENSDARG00000069463	85.3049	-0.617353	0.208398	-2.96238	0.00305272	0.0346791	1.45993	alox12
ENSDARG00000101680	61.8883	0.787446	0.265832	2.96219	0.00305459	0.0346791	1.45993	arl1
ENSDARG00000103923	140.613	-0.507193	0.171188	-2.96278	0.00304876	0.0346791	1.45993	tfap4
ENSDARG00000009950	76.6873	0.679911	0.229622	2.961	0.00306643	0.0347692	1.45881	edf1
ENSDARG00000099745	114.389	-0.551889	0.186524	-2.95881	0.00308832	0.0349775	1.45621	-
ENSDARG00000045230	10.7416	1.34045	0.453109	2.95834	0.00309298	0.0349902	1.45605	cox6b1
ENSDARG00000041569	32.1172	0.907312	0.3068	2.95734	0.00310303	0.035024	1.45563	ces2
ENSDARG00000052966	184.185	0.543405	0.183747	2.95736	0.00310285	0.035024	1.45563	nmt1a
ENSDARG00000076836	107.702	0.676049	0.228706	2.95598	0.00311679	0.0351393	1.45421	-
ENSDARG00000037108	21.884	1.11075	0.375982	2.95426	0.00313415	0.0352948	1.45229	pfdn6
ENSDARG00000042825	31.0438	-0.888668	0.300914	-2.95323	0.00314472	0.0353736	1.45132	rnf169
ENSDARG00000098361	42.8603	0.841963	0.285197	2.95222	0.00315502	0.0354493	1.45039	nudcd3
ENSDARG00000012586	14.8273	-1.23768	0.420174	-2.94563	0.00322298	0.0361355	1.44207	fmnl2a
ENSDARG00000017397	277.899	-0.443945	0.150742	-2.94506	0.00322897	0.0361355	1.44207	smarcc1a
ENSDARG00000027612	11.9115	-1.22522	0.416031	-2.94503	0.00322924	0.0361355	1.44207	gatad1
ENSDARG00000071150	28.9694	-0.93762	0.318389	-2.94489	0.00323068	0.0361355	1.44207	cica
ENSDARG00000069661	18.3669	1.16989	0.39758	2.94254	0.00325533	0.0363701	1.43926	si:dkey-121j17.6
ENSDARG00000045465	22.936	1.01046	0.343483	2.94179	0.00326322	0.0364172	1.43869	lancl2
ENSDARG00000100990	43.7469	0.793013	0.269613	2.9413	0.00326834	0.0364334	1.4385	nme3
ENSDARG00000000943	24.2232	-1.02745	0.349455	-2.94016	0.00328043	0.0364893	1.43783	dzip1
ENSDARG00000018146	27.5131	0.924492	0.314439	2.94013	0.00328073	0.0364893	1.43783	gpx1a
ENSDARG00000035692	1593.06	0.524864	0.178538	2.93978	0.00328445	0.0364898	1.43783	rps3a
ENSDARG00000099555	12.9437	1.20523	0.410316	2.93733	0.00331053	0.0367384	1.43488	foxo1a
ENSDARG00000035122	21.9632	-1.0591	0.360708	-2.93617	0.00332293	0.0368347	1.43374	camsap1b
ENSDARG00000052840	37.8236	0.816369	0.278257	2.93387	0.00334766	0.037026	1.43149	ndufs4
ENSDARG00000102435	7.63828	1.42814	0.486769	2.93391	0.0033472	0.037026	1.43149	plekhf1
ENSDARG00000078578	84.496	-0.601669	0.205173	-2.93249	0.00336253	0.037149	1.43005	fam222bb
ENSDARG00000003860	250.036	-0.613277	0.20921	-2.9314	0.00337437	0.0372383	1.42901	cbx3a
ENSDARG00000099630	5.66591	-1.48397	0.506467	-2.93005	0.00338911	0.0373594	1.4276	-
ENSDARG00000013295	33.5375	1.08194	0.369461	2.92843	0.00340674	0.0374289	1.42679	slc2a3a
ENSDARG00000077215	30.5717	-0.878122	0.29985	-2.92854	0.0034056	0.0374289	1.42679	eif4g3a
ENSDARG00000099203	54.4612	-0.762293	0.260268	-2.92888	0.00340182	0.0374289	1.42679	atp1b2a
ENSDARG00000002220	36.2935	0.831278	0.284165	2.92534	0.00344079	0.0377193	1.42344	zgc:103692
ENSDARG00000091419	102.015	0.725808	0.248104	2.92542	0.00343994	0.0377193	1.42344	nrarpa
ENSDARG00000039052	11.9478	-1.2	0.410597	-2.92258	0.00347142	0.0378763	1.42163	klhl40a
ENSDARG00000039211	16.5917	1.20353	0.411812	2.92251	0.00347224	0.0378763	1.42163	zgc:77439
ENSDARG00000074548	24.97	1.03787	0.355067	2.92302	0.00346651	0.0378763	1.42163	zbtb17
ENSDARG00000092881	25.5846	-0.935558	0.320141	-2.92233	0.00347423	0.0378763	1.42163	-
ENSDARG00000103235	18.0331	1.14952	0.393201	2.9235	0.00346125	0.0378763	1.42163	mfsd8
ENSDARG00000002215	54.0796	-0.902913	0.309021	-2.92185	0.00347962	0.0378795	1.4216	rtca
ENSDARG00000063661	15.9405	1.28123	0.438533	2.92162	0.00348216	0.0378795	1.4216	nuak2
ENSDARG00000029533	2189.46	0.584644	0.20015	2.92103	0.00348873	0.0379093	1.42125	rpl18
ENSDARG00000017901	90.6849	-0.645203	0.220918	-2.92056	0.00349404	0.0379255	1.42107	tln2a
ENSDARG00000031562	18.1824	1.12621	0.385706	2.91987	0.00350174	0.0379675	1.42059	tada2a
ENSDARG00000059298	54.6849	0.756855	0.259252	2.91938	0.00350733	0.0379865	1.42037	spcs1
ENSDARG00000038107	12.7711	-1.22458	0.419536	-2.91889	0.00351279	0.0380041	1.42017	sgcg
ENSDARG00000045296	33.7864	0.870441	0.298317	2.91784	0.00352462	0.0380905	1.41918	myeov2
ENSDARG00000032296	141.159	0.616883	0.211497	2.91674	0.00353708	0.0381835	1.41812	pomp
ENSDARG00000097048	23.6704	1.01802	0.349127	2.9159	0.00354661	0.0382447	1.41743	-
ENSDARG00000058158	8.0365	1.3961	0.479037	2.91439	0.00356384	0.038347	1.41627	trim55b
ENSDARG00000103007	1245.61	0.608716	0.208861	2.91446	0.00356304	0.038347	1.41627	rps3
ENSDARG00000043509	1173.18	0.399839	0.137248	2.91326	0.0035768	0.0384448	1.41516	rpl11
ENSDARG00000033760	7.03919	-1.41771	0.48705	-2.9108	0.00360501	0.038706	1.41222	pmelb
ENSDARG00000014914	28.7933	0.914801	0.314492	2.90882	0.00362791	0.0387369	1.41188	lamp2
ENSDARG00000055759	31.0228	0.898551	0.308937	2.90853	0.00363134	0.0387369	1.41188	efhd2
ENSDARG00000056504	25.31	0.991504	0.340789	2.90943	0.00362083	0.0387369	1.41188	frg1
ENSDARG00000075666	17.05	1.11952	0.384902	2.90859	0.00363057	0.0387369	1.41188	tsc22d3
ENSDARG00000090352	7.35064	1.448	0.497822	2.90867	0.00362967	0.0387369	1.41188	-
ENSDARG00000098355	150.9	-0.726467	0.249666	-2.90976	0.00361712	0.0387369	1.41188	atp5h
ENSDARG00000059866	52.8833	-0.725601	0.249532	-2.90784	0.0036393	0.03878	1.41139	cactin
ENSDARG00000039007	190.877	-0.531204	0.182738	-2.90692	0.00365004	0.038811	1.41105	eno3
ENSDARG00000061249	99.5816	-0.577797	0.198748	-2.90719	0.00364695	0.038811	1.41105	myom1a
ENSDARG00000014867	2089.67	0.59292	0.203998	2.90651	0.00365489	0.0388209	1.41093	rpl8
ENSDARG00000074849	74.7309	0.741947	0.255352	2.90559	0.00366559	0.038893	1.41013	rac1a
ENSDARG00000099122	26.2574	1.02475	0.352899	2.9038	0.00368659	0.0390739	1.40811	naa38
ENSDARG00000068265	31.3229	0.912083	0.314449	2.90057	0.00372482	0.0394369	1.4041	tomm5
ENSDARG00000013072	11.6004	-1.22858	0.423706	-2.8996	0.00373634	0.0395167	1.40322	mmp15b
ENSDARG00000002971	40.6967	0.940438	0.324545	2.89771	0.00375896	0.0397135	1.40106	phc1
ENSDARG00000100223	42.7259	0.811526	0.280221	2.89602	0.00377931	0.039886	1.39918	-
ENSDARG00000006290	111.082	0.547088	0.188946	2.89547	0.00378586	0.0399126	1.39889	ndufs5
ENSDARG00000078847	18.475	1.17375	0.405578	2.89402	0.0038034	0.0400124	1.39781	si:dkey-238o13.4
ENSDARG00000104066	256.153	-0.505808	0.174759	-2.89431	0.00379991	0.0400124	1.39781	-
ENSDARG00000090194	12.3473	1.20124	0.415184	2.89327	0.00381257	0.0400664	1.39722	lamtor5
ENSDARG00000009493	15.1063	-1.19946	0.414705	-2.89233	0.00382396	0.040101	1.39684	si:ch211-45c16.2
ENSDARG00000016058	18.9742	1.0654	0.368319	2.89259	0.00382075	0.040101	1.39684	fibpa
ENSDARG00000053129	43.1693	0.974986	0.337285	2.89069	0.00384392	0.0401828	1.39596	carhsp1
ENSDARG00000069692	39.2015	-1.00108	0.346241	-2.89128	0.00383677	0.0401828	1.39596	-
ENSDARG00000094018	10.0908	-1.27689	0.441675	-2.89101	0.00384	0.0401828	1.39596	si:dkey-111e8.1
ENSDARG00000003749	67.4208	0.691798	0.239437	2.88927	0.00386139	0.0403228	1.39445	polb
ENSDARG00000098595	8.565	-1.43877	0.498755	-2.88473	0.00391756	0.0408663	1.38863	si:ch1073-159d7.11
ENSDARG00000102471	11.7326	-1.32981	0.461285	-2.88284	0.00394107	0.0410684	1.38649	trak2
ENSDARG00000079610	47.3152	-0.786694	0.273071	-2.88092	0.0039652	0.0412331	1.38475	-
ENSDARG00000103917	48.1846	-0.783298	0.271891	-2.88092	0.00396512	0.0412331	1.38475	-
ENSDARG00000075727	12.4693	1.37746	0.478401	2.8793	0.00398556	0.0414013	1.38299	-
ENSDARG00000077839	8.70982	-1.29253	0.449372	-2.87631	0.0040235	0.0417517	1.37933	dhx30
ENSDARG00000019998	36.4281	0.837234	0.29119	2.87521	0.00403757	0.0418102	1.37872	slc30a7
ENSDARG00000079751	61.3633	-0.664126	0.230959	-2.87551	0.00403369	0.0418102	1.37872	megf8
ENSDARG00000104554	5.29803	-1.46389	0.509209	-2.87483	0.00404247	0.0418172	1.37865	zgc:114046; LOC100329290
ENSDARG00000005526	40.9796	-0.766118	0.266527	-2.87445	0.00404737	0.0418242	1.37857	igfn1.1
ENSDARG00000039579	5.54421	1.51229	0.526199	2.87399	0.00405318	0.0418406	1.3784	cfd
ENSDARG00000006413	1201.87	0.461159	0.160494	2.87336	0.00406125	0.0418803	1.37799	rpl38
ENSDARG00000008487	38.9541	-0.916143	0.319148	-2.87059	0.00409705	0.0422055	1.37463	dmd
ENSDARG00000043973	58.8208	0.902997	0.314695	2.86943	0.00411208	0.0423164	1.37349	znf292b
ENSDARG00000035890	36.496	0.905572	0.315893	2.86671	0.00414767	0.0426384	1.3702	fuca1.1
ENSDARG00000101128	5.4441	-1.47084	0.513294	-2.86549	0.0041637	0.0427589	1.36897	-
ENSDARG00000025522	13.2598	1.25458	0.437882	2.86512	0.00416855	0.0427643	1.36892	sgk1
ENSDARG00000039667	64.2969	0.732128	0.255597	2.86439	0.00417816	0.0428186	1.36837	mrpl38
ENSDARG00000094010	19.554	-1.02477	0.357811	-2.864	0.0041833	0.042827	1.36828	swt1
ENSDARG00000020741	26.6893	0.976264	0.341289	2.86052	0.00422945	0.0432548	1.36397	fga
ENSDARG00000059323	114.93	0.653379	0.228513	2.85927	0.00424618	0.043381	1.3627	rpn1
ENSDARG00000037783	30.426	0.996051	0.348502	2.85809	0.00426201	0.0434979	1.36153	proza
ENSDARG00000058543	77.8327	-0.675744	0.236485	-2.85746	0.00427053	0.04354	1.36111	lama5
ENSDARG00000101066	44.2662	0.769313	0.26948	2.85481	0.0043063	0.0438597	1.35793	srp14
ENSDARG00000105350	6.24465	-1.40902	0.493736	-2.8538	0.00432004	0.0439544	1.357	si:ch1073-153i20.4
ENSDARG00000071586	126.627	0.576872	0.202182	2.85324	0.00432765	0.0439867	1.35668	tgfbi
ENSDARG00000029011	33.376	1.0315	0.361827	2.85082	0.00436066	0.0442768	1.35382	xpnpep1
ENSDARG00000068401	145.047	0.494035	0.173452	2.84825	0.00439601	0.04459	1.35076	yap1
ENSDARG00000004956	82.8364	0.680102	0.238845	2.84746	0.00440689	0.0446091	1.35058	zmat2
ENSDARG00000017235	862.471	0.500528	0.17577	2.84764	0.00440453	0.0446091	1.35058	eif5a
ENSDARG00000045373	344.12	-0.441635	0.155222	-2.84518	0.00443864	0.0448846	1.3479	pabpn1
ENSDARG00000052074	11.3246	1.21331	0.426911	2.84206	0.00448225	0.0452745	1.34415	si:ch211-122f10.4
ENSDARG00000079895	35.64	-0.832951	0.29311	-2.84177	0.00448634	0.0452745	1.34415	-
ENSDARG00000055477	30.7598	-0.906332	0.319215	-2.83925	0.00452194	0.045546	1.34155	pelo
ENSDARG00000078694	24.9207	-0.958766	0.337687	-2.83922	0.00452243	0.045546	1.34155	-
ENSDARG00000008551	41.8168	0.860902	0.303319	2.83827	0.00453586	0.0456349	1.3407	pole3
ENSDARG00000005629	33.5234	-0.888689	0.313618	-2.83367	0.00460169	0.0462034	1.33533	smyd2b
ENSDARG00000099449	71.6925	-0.637424	0.224923	-2.83397	0.00459738	0.0462034	1.33533	-
ENSDARG00000015123	99.5242	0.567508	0.200331	2.83285	0.00461352	0.0462753	1.33465	dnase1l4.1
ENSDARG00000031911	20.3595	-1.2259	0.432867	-2.83206	0.00462491	0.0463426	1.33402	-
ENSDARG00000043055	5.99632	-1.40216	0.495186	-2.83158	0.00463181	0.0463649	1.33381	hiat1b
ENSDARG00000011597	62.8819	-0.682029	0.240975	-2.83029	0.00465062	0.0465062	1.33249	atxn2l
ENSDARG00000007065	21.1543	-1.07858	0.381287	-2.8288	0.00467232	0.0466208	1.33142	mrps18b
ENSDARG00000013505	59.3061	-0.716841	0.253461	-2.82821	0.00468089	0.0466208	1.33142	ube2kb
ENSDARG00000035557	28.9538	0.919331	0.325034	2.82841	0.00467793	0.0466208	1.33142	gabarapa
ENSDARG00000087854	27.0926	-1.12126	0.396389	-2.82868	0.00467402	0.0466208	1.33142	si:dkey-108k21.13; zgc:112234
ENSDARG00000060016	113.948	-0.516674	0.182782	-2.82673	0.00470262	0.0467807	1.32993	nsd1a
ENSDARG00000100510	55.8409	0.73068	0.258513	2.82647	0.00470639	0.0467807	1.32993	-
ENSDARG00000090152	14.6709	1.13967	0.403464	2.82472	0.00473218	0.0469899	1.328	anapc10
ENSDARG00000058696	52.784	-0.725937	0.2572	-2.82246	0.00476563	0.0471903	1.32615	tbl1xr1a
ENSDARG00000075783	13.2993	1.17083	0.414743	2.82303	0.00475725	0.0471903	1.32615	hmgxb4a
ENSDARG00000090872	234.327	0.601851	0.213241	2.82239	0.00476665	0.0471903	1.32615	si:dkey-276j7.1
ENSDARG00000010437	4.93408	-1.47572	0.523094	-2.82114	0.00478534	0.0473281	1.32488	fam46c
ENSDARG00000035910	61.5274	-0.637802	0.226203	-2.8196	0.00480831	0.0475079	1.32323	znf281b
ENSDARG00000076657	91.7177	-0.666508	0.236473	-2.81854	0.0048242	0.0476174	1.32223	plagl2
ENSDARG00000099640	35.6807	0.888117	0.315233	2.81734	0.00484238	0.0477492	1.32103	eed
ENSDARG00000025641	73.6787	0.690029	0.245003	2.81641	0.00485634	0.0477917	1.32065	gli2a
ENSDARG00000090656	12.8867	-1.13241	0.402056	-2.81654	0.00485439	0.0477917	1.32065	-
ENSDARG00000075569	92.2167	-0.622743	0.221177	-2.81559	0.00486884	0.0478673	1.31996	gpbp1l1
ENSDARG00000042522	17.1064	1.1823	0.419995	2.81504	0.00487708	0.0479008	1.31966	katnbl1
ENSDARG00000045676	60.2371	-0.657449	0.233576	-2.81471	0.0048822	0.0479035	1.31963	calua
ENSDARG00000100366	26.7398	-0.931523	0.331145	-2.81303	0.00490764	0.0481056	1.3178	-
ENSDARG00000099996	47.8026	-0.727917	0.258851	-2.81211	0.00492178	0.0481965	1.31698	rhot1a
ENSDARG00000038141	94.8363	-0.584275	0.207931	-2.80994	0.00495507	0.0484745	1.31449	atf4b
ENSDARG00000103337	278.518	-0.449473	0.159979	-2.80957	0.0049607	0.0484818	1.31442	-
ENSDARG00000024642	13.0577	-1.23104	0.438262	-2.80891	0.0049709	0.0485336	1.31396	pip5k1ab
ENSDARG00000011371	5.69065	1.45922	0.519622	2.80822	0.00498158	0.04859	1.31345	zgc:64106
ENSDARG00000006408	62.4628	0.724228	0.258008	2.807	0.00500055	0.0487271	1.31223	hmgb3b
ENSDARG00000009214	13.5484	1.13993	0.406486	2.80436	0.00504161	0.0488868	1.31081	mfsd13a
ENSDARG00000021509	96.3038	0.618414	0.220463	2.80506	0.00503067	0.0488868	1.31081	tab2
ENSDARG00000041581	6.50183	-1.36866	0.487967	-2.80481	0.00503456	0.0488868	1.31081	znf143b
ENSDARG00000074581	16.4204	-1.09059	0.388884	-2.8044	0.00504099	0.0488868	1.31081	add2
ENSDARG00000077361	210.268	-0.467916	0.166822	-2.80488	0.0050336	0.0488868	1.31081	bptf
ENSDARG00000018825	34.0515	0.835627	0.298041	2.80373	0.00505145	0.0489092	1.31061	tmem248
ENSDARG00000098304	46.6301	-0.738861	0.263542	-2.80359	0.00505379	0.0489092	1.31061	taok1b
ENSDARG00000019000	263.137	-0.439769	0.156923	-2.80244	0.00507174	0.049035	1.30949	smc3
ENSDARG00000019442	9.49722	-1.30252	0.464942	-2.80147	0.00508705	0.0491351	1.30861	amotl1
ENSDARG00000043720	22.3462	0.963389	0.344022	2.80037	0.00510444	0.0492551	1.30755	cdc45
ENSDARG00000074858	18.6864	1.10243	0.393818	2.79933	0.00512094	0.0493663	1.30657	stard7
ENSDARG00000092945	5.35122	-1.40745	0.503038	-2.79789	0.00514371	0.0495376	1.30507	-
ENSDARG00000054849	94.7931	0.589466	0.210761	2.79684	0.00516046	0.0496507	1.30407	bcat2
ENSDARG00000021343	30.1515	0.973858	0.348431	2.79498	0.00519027	0.049889	1.302	wsb1
ENSDARG00000002991	16.674	-1.05921	0.379236	-2.793	0.00522216	0.0500372	1.30071	cep135
ENSDARG00000005368	22.1008	-0.944806	0.3382	-2.79363	0.00521198	0.0500372	1.30071	mcamb
ENSDARG00000015918	37.6639	-0.86796	0.310788	-2.79277	0.00522588	0.0500372	1.30071	dlat
ENSDARG00000090170	18.7248	-1.10252	0.394697	-2.79332	0.00521701	0.0500372	1.30071	rab11fip4a
ENSDARG00000020573	95.4944	-0.637481	0.228359	-2.79158	0.00524517	0.0501734	1.29953	ddx3a
ENSDARG00000058962	5.65504	1.45474	0.521227	2.791	0.00525453	0.0502144	1.29917	txnl4b
ENSDARG00000037030	94.7702	-0.549905	0.197139	-2.78943	0.00528012	0.0504104	1.29748	casz1
ENSDARG00000021442	83.4311	-0.598838	0.214839	-2.78738	0.00531357	0.0506809	1.29516	cdh11
ENSDARG00000093025	9.10371	-1.33592	0.479406	-2.78662	0.00532604	0.050751	1.29456	-
ENSDARG00000023920	13.0983	1.15151	0.413374	2.78563	0.00534237	0.0508577	1.29364	llgl2
ENSDARG00000028201	17.2546	1.04224	0.374243	2.78492	0.00535404	0.0509199	1.29311	commd8
ENSDARG00000059775	20.2999	-0.955078	0.343032	-2.78423	0.00536553	0.0509802	1.2926	slc32a1
ENSDARG00000012892	56.6757	-0.682879	0.245371	-2.78304	0.00538519	0.051118	1.29143	ammecr1
ENSDARG00000077038	65.7821	-0.772224	0.277562	-2.78217	0.00539971	0.0512068	1.29067	pbrm1l
ENSDARG00000076120	689.887	-0.342708	0.123224	-2.78118	0.00541617	0.0513138	1.28977	foxp4
ENSDARG00000058504	31.0796	0.823031	0.295986	2.78064	0.00542511	0.0513494	1.28946	ap1s2
ENSDARG00000076559	46.5398	-0.790778	0.284523	-2.77931	0.00544742	0.0515114	1.2881	rb1cc1
ENSDARG00000039969	16.4393	1.05754	0.380621	2.77847	0.00546162	0.0515472	1.28779	akirin1
ENSDARG00000040031	301.694	0.509154	0.183233	2.77873	0.0054572	0.0515472	1.28779	tardbp
ENSDARG00000045680	17.6977	-1.15938	0.417804	-2.77494	0.00552126	0.0520606	1.28349	tnpo3
ENSDARG00000007955	27.6103	0.893291	0.322115	2.7732	0.00555074	0.0521549	1.28271	iars
ENSDARG00000015805	82.3433	-0.602311	0.21716	-2.77358	0.00554431	0.0521549	1.28271	cgnl1
ENSDARG00000021833	21.5013	-1.08655	0.391861	-2.7728	0.00555757	0.0521549	1.28271	ahr2
ENSDARG00000099213	170.701	0.473616	0.170785	2.77316	0.0055514	0.0521549	1.28271	glyr1
ENSDARG00000102091	9.99441	1.29021	0.465293	2.7729	0.00555589	0.0521549	1.28271	-
ENSDARG00000095799	8.39008	1.32505	0.477975	2.77222	0.00556756	0.0521992	1.28234	-
ENSDARG00000042249	10.8992	-1.20627	0.435338	-2.77088	0.00559047	0.0523644	1.28096	si:ch211-220f12.1
ENSDARG00000061304	5.22941	-1.43017	0.516447	-2.76924	0.00561866	0.0525292	1.2796	ppp1r9a
ENSDARG00000086075	34.5781	0.876013	0.316305	2.76952	0.00561395	0.0525292	1.2796	ttc3
ENSDARG00000041875	45.1999	0.762491	0.275388	2.76879	0.00562656	0.0525535	1.2794	-
ENSDARG00000000861	146.933	-0.462029	0.166959	-2.76733	0.00565182	0.0526186	1.27886	scrib
ENSDARG00000004931	21.7714	-1.15036	0.415705	-2.76725	0.00565311	0.0526186	1.27886	slc8a3
ENSDARG00000054155	699.6	0.44177	0.159605	2.7679	0.00564188	0.0526186	1.27886	pcna
ENSDARG00000104169	124.55	-0.506677	0.183104	-2.76716	0.00565478	0.0526186	1.27886	si:ch211-212k18.4
ENSDARG00000101161	34.4632	0.896747	0.3242	2.76603	0.00567426	0.0527504	1.27777	orc4
ENSDARG00000062137	41.3101	-0.875801	0.316739	-2.76506	0.0056913	0.0528592	1.27688	stag1b
ENSDARG00000015790	59.2272	0.7101	0.256848	2.76467	0.00569803	0.0528722	1.27677	atp1b3a
ENSDARG00000028848	36.0297	-0.798152	0.288988	-2.76189	0.00574684	0.0532319	1.27383	lsm12a
ENSDARG00000070399	16.0264	1.18115	0.427667	2.76185	0.00574754	0.0532319	1.27383	alg2
ENSDARG00000015649	43.2923	0.792827	0.287254	2.76002	0.0057797	0.0534797	1.27181	rap2c
ENSDARG00000010565	5.62274	-1.42568	0.51665	-2.75946	0.00578967	0.053522	1.27147	aqp4
ENSDARG00000022727	20.3387	-1.10112	0.399177	-2.75847	0.00580729	0.0536349	1.27055	epha2b
ENSDARG00000025436	11.6894	-1.22278	0.443429	-2.75756	0.00582342	0.0537338	1.26975	msrb1a
ENSDARG00000003526	114.572	0.545385	0.197843	2.75665	0.00583961	0.0537512	1.26961	psma5
ENSDARG00000039225	43.5148	-0.732266	0.265676	-2.75624	0.005847	0.0537512	1.26961	vps13a
ENSDARG00000057691	361.254	0.452037	0.163984	2.75658	0.00584087	0.0537512	1.26961	srsf1a
ENSDARG00000078976	10.2691	-1.21396	0.44042	-2.75638	0.00584459	0.0537512	1.26961	nanos1
ENSDARG00000002916	10.884	-1.31935	0.478754	-2.75581	0.00585468	0.0537719	1.26944	sec31b
ENSDARG00000058270	46.8075	-0.70727	0.256728	-2.75494	0.00587026	0.0538651	1.26869	si:ch211-114l13.7
ENSDARG00000059906	198.687	0.471763	0.171276	2.7544	0.00587999	0.0539044	1.26838	sdc4
ENSDARG00000024877	38.2075	0.806038	0.292849	2.7524	0.00591606	0.0541349	1.26652	ptgr1
ENSDARG00000090962	7.32152	-1.36964	0.497609	-2.75244	0.00591529	0.0541349	1.26652	nat14
ENSDARG00000063330	11.1381	-1.20819	0.439059	-2.75176	0.00592758	0.0541404	1.26648	mgat4a
ENSDARG00000076014	43.2795	-0.818256	0.297352	-2.75181	0.00592664	0.0541404	1.26648	erc1b
ENSDARG00000025338	8.51776	1.33082	0.48377	2.75095	0.00594236	0.0541755	1.2662	hagh
ENSDARG00000062248	19.8599	-1.02762	0.373532	-2.75109	0.00593974	0.0541755	1.2662	ptpn21
ENSDARG00000030583	37.3637	0.788978	0.287145	2.74767	0.00600206	0.0546193	1.26265	foxk2
ENSDARG00000074319	55.8219	0.739962	0.2693	2.74773	0.00600103	0.0546193	1.26265	sall1a
ENSDARG00000097825	8.96109	1.26091	0.459285	2.74537	0.00604419	0.0549018	1.26041	-
ENSDARG00000104022	7.12965	1.33445	0.486046	2.74553	0.00604141	0.0549018	1.26041	gcgra
ENSDARG00000015111	150.739	0.601593	0.219203	2.74446	0.0060611	0.0549547	1.25999	ddx39ab
ENSDARG00000020178	8.15466	-1.35832	0.494915	-2.74456	0.00605918	0.0549547	1.25999	nova1
ENSDARG00000057648	58.2523	-0.614433	0.223994	-2.74308	0.00608651	0.0550843	1.25897	dnttip2
ENSDARG00000070477	37.5809	-0.768148	0.280008	-2.74331	0.00608236	0.0550843	1.25897	dnajc2
ENSDARG00000062268	115.682	-0.633242	0.230894	-2.74257	0.00609609	0.0551206	1.25869	jarid2b
ENSDARG00000045618	131.945	0.543979	0.198481	2.74071	0.00613072	0.0553328	1.25702	clta
ENSDARG00000057323	62.5582	-0.770462	0.281111	-2.74078	0.00612942	0.0553328	1.25702	e2f8
ENSDARG00000001621	20.9075	1.06272	0.388	2.73897	0.00616317	0.0555301	1.25547	nfyal
ENSDARG00000101619	20.7462	1.13515	0.414448	2.73894	0.00616379	0.0555301	1.25547	minos1
ENSDARG00000039851	14.6625	1.17236	0.42825	2.73756	0.00618977	0.0557136	1.25404	dhdds
ENSDARG00000036252	15.9889	1.06758	0.390127	2.73649	0.00620983	0.0558434	1.25303	rras2
ENSDARG00000045510	9.51746	-1.24234	0.45413	-2.73564	0.00622597	0.0558871	1.25269	tbc1d22a
ENSDARG00000077811	147.255	0.573191	0.209525	2.73567	0.00622532	0.0558871	1.25269	sox11a
ENSDARG00000105013	9.75877	-1.27267	0.465338	-2.73494	0.00623921	0.0559553	1.25216	hoxa9a
ENSDARG00000030053	244.984	0.624683	0.228453	2.7344	0.00624938	0.0559958	1.25184	eef1db
ENSDARG00000054978	10.4495	1.33879	0.490072	2.73183	0.00629837	0.0563838	1.24885	kifc3
ENSDARG00000074311	22.544	-0.992289	0.363565	-2.72933	0.00634637	0.0567622	1.24594	mast2
ENSDARG00000100000	5.19448	-1.42375	0.521822	-2.72842	0.00636377	0.0568665	1.24514	-
ENSDARG00000071691	59.5469	-0.706414	0.258938	-2.72812	0.00636964	0.0568677	1.24513	uqcrc2b
ENSDARG00000017219	2760.12	-0.378915	0.138921	-2.72756	0.00638052	0.0569136	1.24478	pabpc1a
ENSDARG00000015552	72.9922	-0.617413	0.226421	-2.72684	0.00639443	0.0569352	1.24462	phactr4a
ENSDARG00000099368	69.9249	-0.64061	0.234925	-2.72687	0.00639375	0.0569352	1.24462	slc25a42
ENSDARG00000074166	76.7803	-0.577035	0.211954	-2.72246	0.00647979	0.0576433	1.23925	birc6
ENSDARG00000005394	6.05846	-1.36499	0.501662	-2.72094	0.00650959	0.0577013	1.23881	dnmt3aa
ENSDARG00000015889	167.889	-0.447507	0.164463	-2.72102	0.0065081	0.0577013	1.23881	zc3h15
ENSDARG00000060771	77.122	-0.65923	0.242226	-2.72155	0.00649765	0.0577013	1.23881	map7d3
ENSDARG00000103915	10.6378	1.27025	0.466742	2.72152	0.00649825	0.0577013	1.23881	ero1b
ENSDARG00000017425	4.99933	-1.41764	0.521279	-2.71954	0.00653731	0.0578944	1.23736	crocc2
ENSDARG00000104517	89.6928	0.678521	0.249525	2.71925	0.00654306	0.0578944	1.23736	uqcr10
ENSDARG00000020134	19.4365	-1.02991	0.378904	-2.71812	0.00656536	0.0580399	1.23627	sipa1l1
ENSDARG00000016691	38.8102	0.748651	0.275551	2.71692	0.00658924	0.0581991	1.23508	cd9b
ENSDARG00000020594	168.809	-0.471612	0.173617	-2.71639	0.00659972	0.0582397	1.23478	txlnba
ENSDARG00000054320	176.51	-0.478836	0.176364	-2.71505	0.00662666	0.0583217	1.23417	ap2a1
ENSDARG00000090768	8.26641	1.30355	0.480113	2.7151	0.00662567	0.0583217	1.23417	LOC100536860; zp3.2; zp3.1; zgc:171778; zgc:173556
ENSDARG00000105010	15.7386	1.07385	0.395446	2.71554	0.00661677	0.0583217	1.23417	lztfl1
ENSDARG00000036629	2543.42	0.444507	0.163816	2.71345	0.00665872	0.0585518	1.23246	rps14
ENSDARG00000040224	29.8488	0.852333	0.314247	2.7123	0.00668178	0.0587025	1.23134	krcp
ENSDARG00000086618	86.0369	0.629347	0.232164	2.71079	0.00671237	0.058919	1.22974	psma3
ENSDARG00000101074	46.5353	-0.760222	0.280556	-2.70969	0.00673452	0.0590612	1.2287	glud1b
ENSDARG00000010571	112.716	-0.617379	0.227992	-2.7079	0.00677109	0.0592204	1.22753	ezh2
ENSDARG00000034753	40.9516	0.726387	0.268195	2.70842	0.00676035	0.0592204	1.22753	tspan3a
ENSDARG00000070038	4.95144	1.39313	0.514521	2.70763	0.00677658	0.0592204	1.22753	rbp2a
ENSDARG00000070441	11.0416	-1.17808	0.435092	-2.70765	0.00677623	0.0592204	1.22753	zdhhc17
ENSDARG00000004169	385.05	-0.429394	0.158683	-2.70599	0.00681003	0.0593035	1.22692	stmn1a
ENSDARG00000042308	11.0337	-1.17516	0.434276	-2.70601	0.00680964	0.0593035	1.22692	arhgef18b
ENSDARG00000079949	320.233	-0.488869	0.180604	-2.70685	0.00679248	0.0593035	1.22692	supt16h
ENSDARG00000101180	573.873	0.545926	0.201717	2.70639	0.00680192	0.0593035	1.22692	-
ENSDARG00000021979	10.7153	-1.18504	0.438002	-2.70556	0.00681893	0.0593289	1.22673	-
ENSDARG00000017004	25.2474	-0.903088	0.333934	-2.70439	0.006843	0.0594861	1.22558	myo10
ENSDARG00000011555	60.5208	-0.615089	0.227516	-2.7035	0.00686138	0.0595498	1.22512	spag7
ENSDARG00000071714	10.3323	1.25451	0.464039	2.70345	0.00686235	0.0595498	1.22512	znf983
ENSDARG00000051886	819.687	-0.343755	0.127239	-2.70166	0.00689944	0.0598193	1.22316	ankrd11
ENSDARG00000010658	60.2135	0.682929	0.253165	2.69756	0.00698487	0.0604955	1.21828	insig1
ENSDARG00000038566	8.38237	1.30511	0.483852	2.69734	0.00698964	0.0604955	1.21828	gnptg
ENSDARG00000036687	17.8693	-1.08192	0.401184	-2.69681	0.00700066	0.060538	1.21797	bcl9
ENSDARG00000003599	3898.26	0.443904	0.164679	2.69557	0.00702692	0.0607121	1.21672	rpl3
ENSDARG00000093688	21.0526	0.964087	0.357885	2.69384	0.00706333	0.0609735	1.21486	-
ENSDARG00000071087	9.16883	1.21456	0.450994	2.69309	0.00707942	0.0610592	1.21425	slc35b4
ENSDARG00000011609	127.771	-0.490908	0.18233	-2.69241	0.00709373	0.0611294	1.21375	si:ch211-262e15.1
ENSDARG00000052103	10.7349	-1.26698	0.470704	-2.69167	0.0071096	0.0611706	1.21346	dtymk
ENSDARG00000061108	181.417	-0.509768	0.189392	-2.69161	0.00711085	0.0611706	1.21346	ep300b
ENSDARG00000002988	38.5989	-0.782018	0.290917	-2.68811	0.00718567	0.0616536	1.21004	tnnt2d
ENSDARG00000034013	39.9789	0.723257	0.26904	2.68828	0.00718202	0.0616536	1.21004	rgmd
ENSDARG00000105355	6.11533	-1.33546	0.496801	-2.68812	0.00718551	0.0616536	1.21004	hist1h4l; zgc:154164; zgc:163040
ENSDARG00000090988	16.0895	-1.02774	0.382453	-2.68723	0.00720473	0.0617638	1.20927	-
ENSDARG00000039578	277.723	0.454138	0.169164	2.6846	0.00726163	0.0621977	1.20623	pa2g4a
ENSDARG00000062385	7.54036	1.30097	0.484783	2.68362	0.00728308	0.0623275	1.20532	flcn
ENSDARG00000039966	10.9767	1.28454	0.478837	2.68262	0.00730475	0.0624591	1.2044	prom1a
ENSDARG00000038030	54.7792	0.736087	0.274494	2.68162	0.0073267	0.0625927	1.20348	rbx1
ENSDARG00000092383	8.79191	1.23301	0.459939	2.68081	0.00734453	0.062691	1.20279	si:dkeyp-12a9.5
ENSDARG00000058603	7.6276	-1.31104	0.489267	-2.6796	0.007371	0.0628628	1.20161	jph1a
ENSDARG00000075793	11.7586	-1.09869	0.410169	-2.67862	0.00739258	0.0629688	1.20087	prex1
ENSDARG00000079313	118.149	0.713263	0.266296	2.67846	0.00739613	0.0629688	1.20087	pelp1
ENSDARG00000000442	19.7622	1.01523	0.379504	2.67516	0.00746933	0.0635374	1.19697	slc39a13
ENSDARG00000063219	107.067	-0.529939	0.198143	-2.67453	0.00748332	0.0636018	1.19653	ubap2l
ENSDARG00000054201	113.032	-0.513977	0.192242	-2.67359	0.00750446	0.0637268	1.19568	-
ENSDARG00000045846	14.4539	1.10431	0.41323	2.67239	0.00753136	0.0639005	1.1945	osgep
ENSDARG00000089908	10.2613	-1.21644	0.455461	-2.6708	0.00756717	0.0640946	1.19318	si:ch211-265o23.1
ENSDARG00000100718	7.73283	-1.23291	0.461611	-2.6709	0.00756487	0.0640946	1.19318	me2
ENSDARG00000038113	24.7223	0.999981	0.374627	2.66927	0.00760162	0.0643314	1.19158	rprd1b
ENSDARG00000063649	25.8892	-0.860873	0.32258	-2.66871	0.00761435	0.0643841	1.19122	tead3b
ENSDARG00000007377	40.4078	0.83359	0.312426	2.66812	0.00762767	0.0644418	1.19083	odc1
ENSDARG00000004377	16.3855	-0.988988	0.370886	-2.66655	0.00766331	0.0646192	1.18964	ppp1r13ba
ENSDARG00000102923	20.5839	0.965616	0.36215	2.66634	0.00766823	0.0646192	1.18964	-
ENSDARG00000103845	71.3921	0.725315	0.272009	2.66652	0.0076642	0.0646192	1.18964	zgc:55733
ENSDARG00000103787	107.455	-0.533171	0.200161	-2.66372	0.00772825	0.0650696	1.18662	chd1
ENSDARG00000070959	1191.15	0.334355	0.125564	2.66282	0.007749	0.065189	1.18583	si:ch211-288g17.3
ENSDARG00000003706	6.16101	-1.38785	0.52139	-2.66183	0.00777178	0.0653252	1.18492	ryr2b
ENSDARG00000046002	18.5352	0.971514	0.365068	2.66119	0.00778656	0.0653719	1.18461	necap2
ENSDARG00000104111	19.8228	0.952846	0.358076	2.66102	0.00779053	0.0653719	1.18461	mrps30
ENSDARG00000090552	9.4875	1.22442	0.460996	2.65603	0.0079066	0.0662897	1.17855	si:dkey-7j14.6
ENSDARG00000039093	54.0954	-0.735009	0.27681	-2.65529	0.00792406	0.0663799	1.17796	got1
ENSDARG00000002613	23.4815	0.896821	0.338044	2.65297	0.00797872	0.0664447	1.17754	rpa3
ENSDARG00000016447	145.972	-0.491791	0.185339	-2.65347	0.00796684	0.0664447	1.17754	ythdf1
ENSDARG00000053138	42.3753	-0.75649	0.285103	-2.6534	0.00796862	0.0664447	1.17754	lrrc47
ENSDARG00000070343	11.9997	-1.09768	0.413738	-2.65309	0.00797582	0.0664447	1.17754	hoxc6a
ENSDARG00000074927	10.1018	-1.18894	0.448064	-2.6535	0.00796624	0.0664447	1.17754	bub1bb
ENSDARG00000077410	14.5593	-1.11979	0.421983	-2.65365	0.00796269	0.0664447	1.17754	myo9b
ENSDARG00000101438	5.0199	1.37221	0.517036	2.654	0.00795433	0.0664447	1.17754	lonp2
ENSDARG00000005500	6.07524	1.33976	0.505405	2.65087	0.00802859	0.0665245	1.17702	dgcr6
ENSDARG00000017365	14.9507	-1.06452	0.401573	-2.65088	0.00802826	0.0665245	1.17702	slc23a2
ENSDARG00000038585	57.483	-0.679064	0.256083	-2.65173	0.0080081	0.0665245	1.17702	eif4e2
ENSDARG00000061414	19.082	-0.990432	0.373583	-2.65117	0.00802137	0.0665245	1.17702	slx4
ENSDARG00000102589	20.7885	-1.02633	0.38711	-2.65126	0.00801919	0.0665245	1.17702	-
ENSDARG00000104836	31.3983	-0.800701	0.302031	-2.65105	0.00802413	0.0665245	1.17702	myom1b
ENSDARG00000057974	20.0695	1.0319	0.38962	2.64848	0.00808557	0.0669407	1.17431	parp12b
ENSDARG00000010244	564.07	0.50251	0.189792	2.64769	0.00810433	0.06704	1.17367	rpl22l1
ENSDARG00000079229	6.27635	1.34828	0.509638	2.64556	0.00815561	0.0674079	1.17129	znf414
ENSDARG00000009026	60.2897	-0.750883	0.28388	-2.64507	0.00816733	0.0674364	1.17111	ank2a
ENSDARG00000070261	16.6354	1.06095	0.401182	2.64457	0.00817948	0.0674364	1.17111	crlf3
ENSDARG00000086980	6.46892	-1.3349	0.504736	-2.64475	0.00817514	0.0674364	1.17111	mbd6
ENSDARG00000060054	24.0593	-0.837744	0.316895	-2.6436	0.00820293	0.0675736	1.17022	epc1b
ENSDARG00000024940	7.69081	1.29208	0.488935	2.64265	0.0082261	0.0677082	1.16936	rnf144b
ENSDARG00000016084	15.8873	1.08875	0.412129	2.64178	0.00824718	0.0678254	1.16861	spsb4a
ENSDARG00000103962	108.548	-0.574266	0.217405	-2.64145	0.00825508	0.067834	1.16855	add1
ENSDARG00000104130	68.5174	-0.587792	0.222611	-2.64044	0.00827979	0.0679807	1.16761	rbm26
ENSDARG00000103831	20.7733	0.974674	0.369292	2.6393	0.00830763	0.0681528	1.16652	ankrd13c
ENSDARG00000003684	22.9993	-0.923153	0.349851	-2.63871	0.00832233	0.0682169	1.16611	obsl1a
ENSDARG00000074526	141.357	0.543542	0.206083	2.63749	0.00835216	0.0684049	1.16491	zbtb16b
ENSDARG00000069503	35.3261	0.832665	0.315856	2.63622	0.00838361	0.0686058	1.16364	cldnh
ENSDARG00000079688	277.887	-0.388374	0.147514	-2.6328	0.00846841	0.0692425	1.15963	-
ENSDARG00000011553	178.595	0.477712	0.181545	2.63136	0.00850429	0.0693642	1.15886	atp5f1
ENSDARG00000061039	36.175	-0.730851	0.277693	-2.63187	0.00849174	0.0693642	1.15886	atp10a
ENSDARG00000103576	24.1935	-0.918733	0.349117	-2.63159	0.00849859	0.0693642	1.15886	ephb3b
ENSDARG00000000229	45.6789	-0.73429	0.279169	-2.63027	0.0085317	0.0694687	1.15821	usp49
ENSDARG00000037361	79.8608	0.682029	0.259325	2.63001	0.00853813	0.0694687	1.15821	kdelr2b
ENSDARG00000039719	44.587	-0.686582	0.261045	-2.63013	0.00853532	0.0694687	1.15821	mrps26
ENSDARG00000004621	123.953	0.516456	0.196396	2.62967	0.00854678	0.069482	1.15813	gpm6ab
ENSDARG00000091150	724.376	-0.32912	0.125189	-2.62898	0.0085642	0.0695666	1.1576	mki67
ENSDARG00000010411	34.0752	-0.807093	0.30723	-2.627	0.00861411	0.0698952	1.15555	epn1
ENSDARG00000013144	156.75	-0.497562	0.189416	-2.62682	0.00861876	0.0698952	1.15555	atp1b1a
ENSDARG00000078918	5.54079	1.37827	0.524819	2.62619	0.00863472	0.0699673	1.1551	-
ENSDARG00000005867	70.1102	-0.617057	0.235014	-2.62562	0.00864922	0.0700276	1.15473	gon4l
ENSDARG00000074248	11.3869	1.2079	0.4602	2.62473	0.00867169	0.0701522	1.15396	tmem237b
ENSDARG00000013031	61.8135	0.614923	0.234425	2.62311	0.0087132	0.0704305	1.15224	mta2
ENSDARG00000092609	64.4616	0.678024	0.258626	2.62164	0.00875068	0.0706758	1.15073	aup1
ENSDARG00000018319	96.7356	-0.515305	0.196776	-2.61874	0.0088254	0.071219	1.1474	arglu1b
ENSDARG00000068996	30.2942	0.850114	0.324659	2.61848	0.0088323	0.071219	1.1474	hist2h2l
ENSDARG00000069608	71.2006	-0.659073	0.251784	-2.61761	0.00885475	0.0713419	1.14666	zmp:0000000722
ENSDARG00000070981	151.221	-0.553379	0.211429	-2.61732	0.00886222	0.0713441	1.14664	ash1l
ENSDARG00000016496	90.7574	-0.639271	0.244555	-2.61402	0.00894844	0.0719798	1.14279	cdk8
ENSDARG00000044420	22.8671	0.891395	0.341105	2.61326	0.00896836	0.0720814	1.14218	dnajc19
ENSDARG00000014361	12.4216	-1.09345	0.419036	-2.60943	0.00906921	0.0727674	1.13806	tmbim4
ENSDARG00000046022	64.5082	0.719481	0.275778	2.60891	0.00908308	0.0727674	1.13806	tmed7
ENSDARG00000061479	27.2419	-0.981064	0.37604	-2.60894	0.00908239	0.0727674	1.13806	thsd7aa
ENSDARG00000090462	22.4282	0.919472	0.352411	2.60909	0.00907833	0.0727674	1.13806	mrpl20
ENSDARG00000028173	26.3566	-0.843468	0.323412	-2.60803	0.0091065	0.0728961	1.1373	slc4a2a
ENSDARG00000075132	20.2507	0.97553	0.374236	2.60672	0.00914134	0.0730697	1.13626	fh
ENSDARG00000099117	25.418	-1.14453	0.439077	-2.60666	0.00914293	0.0730697	1.13626	si:dkey-33i11.4
ENSDARG00000057912	268.361	0.421082	0.161708	2.60397	0.00921512	0.0735873	1.1332	eif1axb
ENSDARG00000057698	74.8276	0.56819	0.218472	2.60075	0.00930208	0.0742219	1.12947	ctsd
ENSDARG00000079756	13.1943	-1.08624	0.417807	-2.59986	0.00932627	0.0743551	1.12869	peak1
ENSDARG00000097740	8.63215	1.24907	0.480575	2.59911	0.00934648	0.0743972	1.12844	LOC569097
ENSDARG00000103207	9.04306	-1.15333	0.443738	-2.59911	0.00934656	0.0743972	1.12844	rab11fip4b
ENSDARG00000010078	19.7239	0.973655	0.375043	2.59612	0.0094284	0.0749884	1.12501	nup133
ENSDARG00000008976	189.095	-0.456978	0.176078	-2.59532	0.0094503	0.0751022	1.12435	mdn1
ENSDARG00000079716	35.6973	-0.724598	0.279428	-2.59315	0.00951015	0.0754568	1.1223	sin3aa
ENSDARG00000102477	11.7285	1.15044	0.44362	2.59331	0.00950584	0.0754568	1.1223	stard4
ENSDARG00000104359	318.533	0.528989	0.204212	2.59039	0.00958666	0.0760031	1.11917	anxa1c
ENSDARG00000002172	22.0753	0.924698	0.357196	2.58877	0.00963196	0.0762402	1.11782	aplnra
ENSDARG00000007370	46.9956	-0.785961	0.303595	-2.58885	0.00962975	0.0762402	1.11782	dysf
ENSDARG00000061960	13.1011	-1.04948	0.405449	-2.58845	0.00964096	0.0762505	1.11776	ube3b
ENSDARG00000052368	16.46	-0.949684	0.367189	-2.58636	0.00969946	0.0765547	1.11603	cltb
ENSDARG00000058454	216.179	0.438922	0.169722	2.58613	0.00970607	0.0765547	1.11603	dynll1
ENSDARG00000076518	14.5337	1.05766	0.408996	2.58598	0.00971032	0.0765547	1.11603	mettl1
ENSDARG00000093135	10.5517	-1.1705	0.452563	-2.58639	0.00969885	0.0765547	1.11603	-
ENSDARG00000017445	345.795	0.538547	0.208598	2.58175	0.00983015	0.0774378	1.11105	eif3i
ENSDARG00000000966	102.602	-0.553741	0.21468	-2.57938	0.00989778	0.0776005	1.11014	ncor2
ENSDARG00000007217	17.7509	-0.977473	0.378955	-2.57939	0.00989746	0.0776005	1.11014	wdr55
ENSDARG00000007720	83.8226	0.718282	0.278391	2.58012	0.00987657	0.0776005	1.11014	sub1b
ENSDARG00000063299	14.7311	-1.06153	0.411521	-2.57953	0.00989346	0.0776005	1.11014	pcloa
ENSDARG00000077388	38.0437	-0.754723	0.292498	-2.58027	0.00987239	0.0776005	1.11014	-
ENSDARG00000099200	26.0568	0.841504	0.326215	2.5796	0.00989142	0.0776005	1.11014	-
ENSDARG00000020521	32.148	-0.761305	0.29536	-2.57755	0.00995043	0.0779516	1.10817	exoc6
ENSDARG00000033307	39.7676	0.751006	0.291629	2.57521	0.0100179	0.0783137	1.10616	igf2b
ENSDARG00000043713	93.4929	0.560521	0.217628	2.5756	0.0100066	0.0783137	1.10616	asf1bb
ENSDARG00000101794	21.383	1.03962	0.403715	2.57513	0.0100204	0.0783137	1.10616	atp6v0e1
ENSDARG00000098153	11.2721	1.15445	0.448382	2.57471	0.0100325	0.0783469	1.10598	lhfpl2b
ENSDARG00000034160	41.0392	-0.80922	0.314687	-2.57151	0.0101256	0.0789112	1.10286	slc4a1ap
ENSDARG00000060348	15.9525	-0.988384	0.384296	-2.57193	0.0101132	0.0789112	1.10286	map3k3
ENSDARG00000098783	42.3616	0.719639	0.279862	2.57141	0.0101287	0.0789112	1.10286	polr2b
ENSDARG00000004318	6.28461	-1.30218	0.507058	-2.56811	0.0102253	0.0791047	1.1018	cbwd
ENSDARG00000021082	19.3037	-0.918759	0.357585	-2.56934	0.0101891	0.0791047	1.1018	sec31a
ENSDARG00000037618	37.8885	1.36252	0.530246	2.5696	0.0101816	0.0791047	1.1018	ddit4
ENSDARG00000039455	24.8	0.877957	0.341811	2.56855	0.0102126	0.0791047	1.1018	tspan15
ENSDARG00000069397	42.3002	-0.735026	0.286108	-2.56905	0.0101977	0.0791047	1.1018	zswim8
ENSDARG00000070231	8.81665	-1.21841	0.474132	-2.56978	0.0101763	0.0791047	1.1018	-
ENSDARG00000077404	56.4159	0.667055	0.259587	2.56968	0.0101793	0.0791047	1.1018	ncoa3
ENSDARG00000087543	6.24829	-1.33821	0.52105	-2.5683	0.0102198	0.0791047	1.1018	si:dkey-108k21.12; zgc:163040; hist1h4l
ENSDARG00000102546	101.628	-0.510659	0.198824	-2.5684	0.010217	0.0791047	1.1018	cdk11b
ENSDARG00000036359	15.4909	1.04386	0.406717	2.56654	0.0102719	0.079403	1.10016	riox2
ENSDARG00000100854	47.1684	-0.667584	0.260655	-2.56118	0.0104317	0.0805752	1.0938	ago4
ENSDARG00000042717	25.2278	0.949976	0.371095	2.55992	0.0104695	0.0808045	1.09256	adipor1b
ENSDARG00000077906	54.7611	-0.656111	0.256671	-2.55623	0.0105812	0.081603	1.08829	rnf165a
ENSDARG00000099663	134.712	0.531481	0.207964	2.55563	0.0105995	0.0816806	1.08788	cox5ab
ENSDARG00000019646	6.31695	1.3147	0.514618	2.55471	0.0106277	0.0817581	1.08747	twist3
ENSDARG00000036675	315.509	0.43876	0.17176	2.55449	0.0106343	0.0817581	1.08747	hnrnpa1b
ENSDARG00000040890	55.7412	0.627878	0.245748	2.55497	0.0106197	0.0817581	1.08747	fdps
ENSDARG00000074676	90.8709	-0.5036	0.197179	-2.55403	0.0106486	0.081804	1.08723	rprd2b
ENSDARG00000076241	82.101	-0.632582	0.24774	-2.55341	0.0106673	0.0818847	1.0868	txlnbb
ENSDARG00000012932	10.2564	1.17227	0.459246	2.5526	0.0106923	0.0818862	1.08679	mat2b
ENSDARG00000032430	73.1176	0.61821	0.242181	2.55268	0.0106899	0.0818862	1.08679	ppp2r1bb
ENSDARG00000036630	17.5296	-1.1111	0.435226	-2.55293	0.010682	0.0818862	1.08679	plp2
ENSDARG00000033987	53.4912	-0.628068	0.246181	-2.55124	0.010734	0.0820575	1.08588	rsrc1
ENSDARG00000069521	32.3391	0.78539	0.307868	2.55106	0.0107395	0.0820575	1.08588	vps29
ENSDARG00000100499	94.4755	-0.557154	0.218375	-2.55136	0.0107304	0.0820575	1.08588	cpeb4b
ENSDARG00000098312	14.181	-1.0194	0.399792	-2.54984	0.0107773	0.0822825	1.08469	scarb2a
ENSDARG00000100402	18.7946	-0.944104	0.370345	-2.54926	0.0107953	0.0823569	1.0843	fgd1
ENSDARG00000016080	33.178	-0.775179	0.304236	-2.54795	0.0108358	0.082602	1.08301	nob1
ENSDARG00000095191	11.4631	-1.09588	0.430257	-2.54704	0.0108641	0.0827543	1.08221	-
ENSDARG00000009868	20.156	0.92852	0.364664	2.54624	0.0108891	0.0828175	1.08188	dcaf11
ENSDARG00000100558	134.328	-0.49266	0.193473	-2.5464	0.010884	0.0828175	1.08188	slbp
ENSDARG00000102975	19.4381	1.04391	0.410099	2.54551	0.0109118	0.0829265	1.08131	nsg2
ENSDARG00000037020	51.9928	-0.605566	0.238052	-2.54384	0.010964	0.0832594	1.07957	kif1b
ENSDARG00000058479	131.871	-1.00393	0.394863	-2.54247	0.0110072	0.083459	1.07853	zgc:110425
ENSDARG00000100981	13.8676	-1.11182	0.437266	-2.54266	0.0110012	0.083459	1.07853	-
ENSDARG00000003109	21.4239	0.941717	0.370473	2.54193	0.0110241	0.08346	1.07852	rcan1a
ENSDARG00000044365	7.92558	1.22936	0.483611	2.54203	0.011021	0.08346	1.07852	angptl3
ENSDARG00000074691	18.1682	1.00453	0.395294	2.54122	0.0110466	0.0835666	1.07797	mms22l
ENSDARG00000060036	93.4321	0.617721	0.243345	2.53846	0.0111343	0.0841653	1.07487	aimp1
ENSDARG00000062765	193.272	-0.469792	0.185185	-2.53689	0.0111843	0.0844793	1.07325	whsc1l1
ENSDARG00000003429	141.073	0.584928	0.2306	2.53655	0.0111951	0.0844963	1.07316	hnrpdl
ENSDARG00000071445	14.906	-0.997779	0.394006	-2.5324	0.0113286	0.0854383	1.06835	myoz1b
ENSDARG00000103739	38.7963	-0.842268	0.33268	-2.53177	0.0113489	0.0855269	1.0679	LOC797750
ENSDARG00000067729	22.2057	-1.08141	0.42746	-2.52986	0.0114107	0.0859271	1.06587	arid3c
ENSDARG00000037639	8.47242	1.17254	0.463582	2.5293	0.011429	0.0859993	1.06551	nkx3.2
ENSDARG00000011703	5.31918	-1.27128	0.502755	-2.52864	0.0114507	0.0860656	1.06517	clocka
ENSDARG00000099351	7.953	1.22936	0.486209	2.52847	0.0114562	0.0860656	1.06517	igfbp1a
ENSDARG00000100446	259.932	-0.38781	0.153392	-2.52823	0.0114638	0.0860656	1.06517	si:ch211-286o17.1
ENSDARG00000063682	24.3063	-0.862715	0.341411	-2.52691	0.011507	0.0863246	1.06387	-
ENSDARG00000069850	30.4457	0.912031	0.36114	2.52542	0.0115559	0.0865599	1.06268	mrpl30
ENSDARG00000098334	22.0853	0.890216	0.352496	2.52546	0.0115546	0.0865599	1.06268	exosc3
ENSDARG00000054931	7.42739	-1.26658	0.501794	-2.52411	0.0115993	0.0868193	1.06138	ppp2r5b
ENSDARG00000045639	227.509	-0.438398	0.173891	-2.52111	0.0116986	0.087497	1.05801	elavl4
ENSDARG00000005840	57.1899	0.62251	0.247034	2.51994	0.0117375	0.0877211	1.0569	got2b
ENSDARG00000062361	91.0513	-0.60978	0.242133	-2.51837	0.01179	0.0880475	1.05528	zgc:158234
ENSDARG00000074759	69.3028	-0.56984	0.226332	-2.51771	0.011812	0.088145	1.0548	ccar1
ENSDARG00000005476	67.614	-0.627815	0.24943	-2.517	0.0118359	0.0881912	1.05457	nav3
ENSDARG00000103528	20.8518	0.909408	0.361299	2.51705	0.0118342	0.0881912	1.05457	-
ENSDARG00000001721	139.134	0.444497	0.176643	2.51635	0.0118576	0.0882861	1.05411	oc90
ENSDARG00000021702	57.1004	0.684886	0.272262	2.51554	0.011885	0.0884237	1.05343	pdcd4a
ENSDARG00000061759	78.1216	-0.631947	0.251342	-2.51429	0.0119272	0.0886361	1.05239	kdm6a
ENSDARG00000074379	28.2328	-0.86391	0.343617	-2.51417	0.0119314	0.0886361	1.05239	knstrn
ENSDARG00000046048	14.6962	-0.984282	0.391598	-2.5135	0.011954	0.0887373	1.05189	vapal
ENSDARG00000037190	9.40099	-1.09355	0.435461	-2.51126	0.0120302	0.0892051	1.04961	-
ENSDARG00000051762	22.994	-0.883711	0.351919	-2.51112	0.012035	0.0892051	1.04961	-
ENSDARG00000061864	8.42988	-1.17165	0.466845	-2.50971	0.0120829	0.0894928	1.04821	hdlbpb
ENSDARG00000010207	13.8552	-1.1202	0.446467	-2.50903	0.0121064	0.0895997	1.04769	smad3b
ENSDARG00000074554	63.2232	-0.543597	0.216683	-2.50872	0.0121168	0.0896103	1.04764	tspan31
ENSDARG00000020261	357.153	-0.337881	0.134702	-2.50835	0.0121297	0.0896388	1.0475	rab2a
ENSDARG00000011188	27.7059	0.799062	0.31875	2.50686	0.0121808	0.0899247	1.04612	acvr2aa
ENSDARG00000067668	7.30772	1.22538	0.488894	2.50643	0.0121956	0.0899247	1.04612	-
ENSDARG00000105223	41.2315	0.712294	0.284162	2.50665	0.0121881	0.0899247	1.04612	pmp22a
ENSDARG00000104314	10.5763	-1.07047	0.427338	-2.50498	0.0122458	0.0902272	1.04466	nrg1
ENSDARG00000015997	14.2395	-1.0289	0.410884	-2.50412	0.0122756	0.0903777	1.04394	mfsd5
ENSDARG00000078404	7.55036	-1.19174	0.475959	-2.50387	0.0122844	0.0903777	1.04394	cdh26.1
ENSDARG00000041779	109.907	-0.47252	0.188824	-2.50243	0.0123343	0.0906773	1.0425	-
ENSDARG00000013938	154.385	0.469985	0.187831	2.50216	0.0123437	0.0906792	1.04249	psmb3
ENSDARG00000079679	8.18392	-1.17552	0.469921	-2.50152	0.0123662	0.0907772	1.04202	cep112
ENSDARG00000018460	57.876	-0.651015	0.260532	-2.49879	0.0124619	0.0914116	1.039	mbnl2
ENSDARG00000043740	10.2665	1.15795	0.463598	2.49775	0.0124983	0.0915675	1.03826	efcab11
ENSDARG00000063230	5.41184	1.29066	0.516747	2.49766	0.0125016	0.0915675	1.03826	bmp7b
ENSDARG00000023542	8.0866	-1.14534	0.458723	-2.49679	0.0125322	0.0917237	1.03752	cdh7
ENSDARG00000019572	49.3955	0.638065	0.255582	2.49652	0.0125418	0.0917263	1.03751	taf7
ENSDARG00000009567	72.1244	-0.527428	0.211386	-2.4951	0.0125922	0.0920274	1.03608	-
ENSDARG00000005525	22.5542	0.933999	0.374516	2.49388	0.0126354	0.0922067	1.03524	acy3.2
ENSDARG00000094760	5.31232	1.28462	0.515099	2.49393	0.0126336	0.0922067	1.03524	si:dkey-125i10.3
ENSDARG00000103785	6.49783	1.26578	0.507682	2.49326	0.0126578	0.0923021	1.03479	sult2st2
ENSDARG00000055026	32.5142	-0.760903	0.305223	-2.49294	0.0126689	0.0923155	1.03473	ptch2
ENSDARG00000073753	27.1944	-0.894316	0.35906	-2.49072	0.0127486	0.0927718	1.03258	-
ENSDARG00000075526	22.2059	0.959927	0.385409	2.49067	0.0127503	0.0927718	1.03258	pwwp2a
ENSDARG00000029692	12.3778	-1.04855	0.421093	-2.49006	0.0127721	0.0928258	1.03233	rufy3
ENSDARG00000055592	14.4664	1.03388	0.415221	2.48994	0.0127764	0.0928258	1.03233	capn2b
ENSDARG00000003695	363.413	-0.369568	0.148519	-2.48836	0.0128333	0.0931023	1.03104	vdac3
ENSDARG00000016687	64.7879	-0.554722	0.222915	-2.48849	0.0128286	0.0931023	1.03104	acadvl
ENSDARG00000011600	57.6464	-0.696023	0.279792	-2.48765	0.0128591	0.0932213	1.03048	epha4b
ENSDARG00000029472	116.007	-0.50413	0.20277	-2.48621	0.0129111	0.0934005	1.02965	mllt4a
ENSDARG00000036279	56.2786	-0.695189	0.279566	-2.48668	0.0128943	0.0934005	1.02965	lamc1
ENSDARG00000056583	26.4246	-0.780599	0.313975	-2.48619	0.0129121	0.0934005	1.02965	ndufs6
ENSDARG00000036040	24.3458	0.849745	0.341891	2.48543	0.0129395	0.0935308	1.02905	atg13
ENSDARG00000013729	119.08	0.516683	0.208021	2.4838	0.0129988	0.0938909	1.02738	srsf6a
ENSDARG00000021004	46.4295	0.65771	0.264925	2.48263	0.0130417	0.0941322	1.02626	c5
ENSDARG00000008388	23.8015	-0.87986	0.35471	-2.4805	0.0131197	0.0946263	1.02399	mmp14b
ENSDARG00000026053	13.6028	1.00284	0.404375	2.47998	0.0131388	0.0946877	1.02371	hltf
ENSDARG00000093232	16.2734	-0.962737	0.388239	-2.47975	0.0131474	0.0946877	1.02371	-
ENSDARG00000074465	14.7164	-0.938119	0.378577	-2.47802	0.0132115	0.0950117	1.02222	vps13c
ENSDARG00000101578	58.8129	0.711035	0.28691	2.47825	0.0132028	0.0950117	1.02222	e2f4
ENSDARG00000101009	45.3179	0.717169	0.289462	2.4776	0.0132271	0.0950547	1.02203	cited4b
ENSDARG00000016904	23.453	0.88236	0.356175	2.47732	0.0132372	0.0950582	1.02201	bckdk
ENSDARG00000094792	20.1378	-0.9603	0.388184	-2.47382	0.0133676	0.095925	1.01807	twf2
ENSDARG00000102305	8.5046	1.15681	0.467701	2.47339	0.0133838	0.0959724	1.01785	svbp
ENSDARG00000017834	11.0564	-1.10528	0.447023	-2.47253	0.0134159	0.0961326	1.01713	micall2b
ENSDARG00000100789	38.8349	0.89269	0.361105	2.47211	0.0134319	0.0961775	1.01693	plgrkt
ENSDARG00000021466	17.1101	0.994644	0.402564	2.47077	0.0134822	0.096403	1.01591	ireb2
ENSDARG00000039830	48.1064	0.692741	0.280402	2.47053	0.0134914	0.096403	1.01591	gng5
ENSDARG00000045402	12.9329	1.08953	0.441016	2.4705	0.0134925	0.096403	1.01591	commd3
ENSDARG00000098855	8.41292	1.1476	0.464575	2.47021	0.0135032	0.0964101	1.01588	osxm
ENSDARG00000026967	94.6693	0.554379	0.22457	2.46863	0.0135633	0.0967692	1.01426	ap2s1
ENSDARG00000082753	10332.5	-1.06344	0.430878	-2.46807	0.0135843	0.096849	1.0139	-
ENSDARG00000006003	46.4315	0.713194	0.288998	2.46781	0.0135941	0.0968493	1.0139	mycla
ENSDARG00000014244	132.24	0.464687	0.188515	2.46499	0.0137017	0.0975158	1.01092	rbmx
ENSDARG00000053152	15.2638	0.973358	0.394896	2.46484	0.0137073	0.0975158	1.01092	pcmtd1
ENSDARG00000010381	34.6298	0.708085	0.287329	2.46437	0.0137254	0.0975747	1.01066	rnf2
ENSDARG00000009136	42.2431	0.790922	0.321031	2.46369	0.0137515	0.0976896	1.01015	tp53bp2a
ENSDARG00000055151	81.4731	-0.565384	0.229613	-2.46234	0.0138035	0.0979891	1.00882	smyd2a
ENSDARG00000014083	24.7273	0.810628	0.329452	2.46053	0.0138731	0.0984079	1.00697	wdr82
ENSDARG00000040513	5.19757	1.26878	0.515703	2.46029	0.0138824	0.0984079	1.00697	zgc:92313
ENSDARG00000058041	54.6305	0.677084	0.275236	2.46001	0.0138934	0.0984155	1.00694	ndufa8
ENSDARG00000020863	8.95799	-1.17168	0.476422	-2.45933	0.0139195	0.0985303	1.00643	-
ENSDARG00000078145	7.44371	-1.1355	0.461837	-2.45867	0.0139453	0.0986426	1.00594	si:ch211-218g4.2
ENSDARG00000096533	14.8436	0.980189	0.398954	2.4569	0.0140144	0.0990601	1.0041	rltgr
ENSDARG00000013628	112.72	0.484446	0.197305	2.45532	0.0140759	0.0993986	1.00262	cd164
ENSDARG00000017744	145.303	-0.506247	0.206246	-2.45458	0.014105	0.0993986	1.00262	smc2
ENSDARG00000037153	34.0579	0.726528	0.296012	2.45439	0.0141124	0.0993986	1.00262	atp6ap1b
ENSDARG00000102787	45.4882	-0.656201	0.267335	-2.4546	0.0141041	0.0993986	1.00262	fam193a
ENSDARG00000105088	17.5346	-1.11145	0.452702	-2.45515	0.0140826	0.0993986	1.00262	tenm4
ENSDARG00000001807	5.25874	1.26609	0.516095	2.45322	0.0141584	0.0995393	1.00201	tnfrsf21
ENSDARG00000027813	66.5363	0.660885	0.269546	2.45184	0.0142127	0.0995393	1.00201	nus1
ENSDARG00000030297	72.1816	-0.635034	0.258895	-2.45286	0.0141726	0.0995393	1.00201	-
ENSDARG00000031020	71.8238	0.524537	0.21388	2.45248	0.0141875	0.0995393	1.00201	pip4k2ca
ENSDARG00000062244	142.021	-0.49252	0.200868	-2.45196	0.014208	0.0995393	1.00201	setd2
ENSDARG00000062650	105.433	-0.526263	0.214614	-2.45214	0.0142009	0.0995393	1.00201	rif1
ENSDARG00000062662	10.4732	-1.08135	0.440779	-2.45327	0.0141562	0.0995393	1.00201	lmod3
ENSDARG00000070794	33.9186	0.829611	0.338349	2.45194	0.0142089	0.0995393	1.00201	greb1
ENSDARG00000002405	9.00369	-1.12115	0.457547	-2.45034	0.0142719	0.0998834	1.00051	si:ch211-225b11.1
ENSDARG00000030237	48.2934	0.679124	0.277292	2.44913	0.0143201	0.10015	0.999349	pgrmc2
ENSDARG00000056473	21.5551	-0.858246	0.350487	-2.44872	0.0143364	0.100193	0.999163	chaf1b
ENSDARG00000074431	44.8009	0.656278	0.2681	2.44789	0.0143697	0.100355	0.998461	-
ENSDARG00000007959	23.2988	0.842706	0.34441	2.44681	0.0144127	0.100522	0.997738	hibadhb
ENSDARG00000025254	61.7596	-0.553446	0.226217	-2.44653	0.0144241	0.100522	0.997738	s100a10b
ENSDARG00000078313	73.9848	-0.544248	0.222453	-2.44658	0.0144219	0.100522	0.997738	LOC100332329
ENSDARG00000045802	16.061	-0.989023	0.404409	-2.4456	0.014461	0.100709	0.996932	hapln3
ENSDARG00000058949	8.65153	-1.10922	0.453608	-2.44532	0.0144722	0.100716	0.996901	spin1
ENSDARG00000055124	40.4848	-0.68772	0.281276	-2.445	0.0144854	0.100737	0.996811	ccnl1a
ENSDARG00000104108	5.71817	1.24599	0.509713	2.44449	0.0145056	0.100807	0.996511	slco1d1
ENSDARG00000104347	30.8955	0.842872	0.344969	2.44332	0.0145527	0.101063	0.995407	rtn4b
ENSDARG00000025972	49.6019	0.661996	0.271015	2.44266	0.0145795	0.101145	0.995056	mcts1
ENSDARG00000089856	12.8107	-1.14902	0.470424	-2.44253	0.0145849	0.101145	0.995056	-
ENSDARG00000039005	43.3174	0.665318	0.272466	2.44184	0.0146127	0.101267	0.994531	trappc1
ENSDARG00000010194	107.474	-0.461648	0.189139	-2.44078	0.0146556	0.101493	0.993563	eif4bb
ENSDARG00000041575	9.48202	1.13431	0.464894	2.43992	0.0146905	0.101655	0.992872	trmt10c
ENSDARG00000044852	19.4736	0.897207	0.367753	2.4397	0.0146994	0.101655	0.992872	wbp2nl
ENSDARG00000054290	666.558	-0.35049	0.143682	-2.43934	0.0147142	0.101686	0.992739	acin1a
ENSDARG00000041317	39.5078	0.808102	0.33137	2.43867	0.0147415	0.10171	0.992635	rangap1a
ENSDARG00000045490	86.2085	0.673368	0.276162	2.43831	0.0147562	0.10171	0.992635	ndufb2
ENSDARG00000078759	7.38509	-1.15906	0.475319	-2.43849	0.0147486	0.10171	0.992635	dna2
ENSDARG00000092870	11.6645	1.07119	0.439329	2.43825	0.0147588	0.10171	0.992635	-
ENSDARG00000043531	8.91401	1.13343	0.464904	2.43799	0.0147692	0.101711	0.992631	jun
ENSDARG00000017211	19.3289	-0.910148	0.373422	-2.43732	0.0147968	0.10176	0.992423	plxnb1b
ENSDARG00000062463	74.753	-0.537302	0.22043	-2.43752	0.0147885	0.10176	0.992423	-
ENSDARG00000002593	11.6424	1.06717	0.437932	2.43685	0.0148159	0.101821	0.992164	slc45a2
ENSDARG00000099352	10.7618	-1.08638	0.446082	-2.43537	0.0148764	0.102166	0.990694	-
ENSDARG00000037238	22.7656	0.863473	0.354642	2.43477	0.0149011	0.102247	0.990349	smad5
ENSDARG00000102565	22.8142	-0.850669	0.34941	-2.43458	0.0149089	0.102247	0.990349	vasnb
ENSDARG00000031119	9.80576	1.10855	0.455534	2.43351	0.0149531	0.102479	0.989364	baiap2l1b
ENSDARG00000074955	200.158	0.490745	0.201834	2.43143	0.0150393	0.102928	0.987468	nup98
ENSDARG00000103759	20.767	1.00962	0.415214	2.43156	0.0150341	0.102928	0.987468	fahd2a
ENSDARG00000041449	9.59835	-1.15186	0.474588	-2.42708	0.015221	0.103956	0.983151	spred1
ENSDARG00000057456	23.3756	-0.815483	0.335945	-2.42743	0.0152061	0.103956	0.983151	ppp3ccb
ENSDARG00000074498	51.8945	-0.633718	0.261101	-2.4271	0.0152201	0.103956	0.983151	chd9
ENSDARG00000006225	156.556	0.437218	0.180171	2.42668	0.0152377	0.103998	0.982974	ddx39aa
ENSDARG00000033170	6.29406	1.22602	0.505296	2.42634	0.0152518	0.104023	0.982871	sult2st1
ENSDARG00000009447	327.114	0.392395	0.16176	2.42579	0.015275	0.10411	0.982509	atp5g3b
ENSDARG00000094300	24.9485	0.881108	0.36333	2.42509	0.0153047	0.10424	0.981965	-
ENSDARG00000012453	9.40287	1.12597	0.464499	2.42406	0.0153481	0.104393	0.98133	rnls
ENSDARG00000058444	55.8501	0.616786	0.254438	2.42411	0.0153458	0.104393	0.98133	snx6
ENSDARG00000008818	33.7626	-0.753577	0.310921	-2.42369	0.0153635	0.104426	0.981193	hsf1
ENSDARG00000035751	257.661	-0.338688	0.139792	-2.4228	0.0154012	0.10461	0.980426	ipo7
ENSDARG00000061159	35.3092	-0.729613	0.301366	-2.42102	0.0154771	0.105054	0.978588	bicra
ENSDARG00000007760	22.6552	0.823318	0.340467	2.4182	0.0155973	0.105657	0.976101	spg21
ENSDARG00000055996	1183.01	0.428647	0.177225	2.41866	0.0155778	0.105657	0.976101	rps8a
ENSDARG00000058366	9.37598	1.1154	0.461254	2.41819	0.015598	0.105657	0.976101	si:dkey-222f8.3
ENSDARG00000098299	10.6975	-1.10057	0.455323	-2.41712	0.0156437	0.105894	0.975128	-
ENSDARG00000015627	31.02	-0.820714	0.339749	-2.41564	0.0157074	0.106253	0.97366	rgs6
ENSDARG00000056379	13.3001	0.984253	0.407596	2.41478	0.0157449	0.106434	0.97292	si:ch73-86n18.1
ENSDARG00000100242	11.1342	1.06918	0.442825	2.41444	0.0157593	0.106459	0.97282	dph5
ENSDARG00000068992	1784.79	-0.370554	0.153522	-2.41368	0.0157923	0.106543	0.972474	hspa8
ENSDARG00000079889	6.03597	-1.20729	0.50019	-2.41366	0.0157934	0.106543	0.972474	phldb2a
ENSDARG00000013841	6.92619	-1.17978	0.488967	-2.41281	0.0158301	0.106714	0.97178	abl2
ENSDARG00000044954	7.57271	-1.19667	0.496013	-2.41258	0.0158401	0.106714	0.97178	slit1a
ENSDARG00000020834	189.452	-0.479915	0.199067	-2.41082	0.0159167	0.107084	0.970275	si:dkey-230p4.1
ENSDARG00000096554	24.7213	-0.829837	0.344213	-2.41082	0.0159167	0.107084	0.970275	si:dkey-25o16.4
ENSDARG00000025850	1171.15	0.48836	0.202672	2.4096	0.0159699	0.107369	0.969122	rps21
ENSDARG00000103464	19.4397	0.996335	0.41368	2.40847	0.0160197	0.10763	0.968065	-
ENSDARG00000005540	116.541	-0.482145	0.20025	-2.40772	0.0160525	0.107632	0.968059	xpo7
ENSDARG00000025467	35.9853	-0.728945	0.302698	-2.40816	0.0160333	0.107632	0.968059	aatf
ENSDARG00000041299	21.9853	-1.01411	0.421189	-2.40772	0.0160523	0.107632	0.968059	zgc:110796
ENSDARG00000079312	67.9891	-0.622551	0.258616	-2.40724	0.0160737	0.107701	0.967779	kmt2ca
ENSDARG00000006859	71.7553	0.629707	0.261741	2.40584	0.0161352	0.107967	0.966707	nkain1
ENSDARG00000054433	33.1478	0.766696	0.318656	2.40603	0.0161269	0.107967	0.966707	yipf6
ENSDARG00000009196	16.9066	0.933635	0.388147	2.40536	0.0161565	0.108037	0.966428	anxa3a; zgc:113858
ENSDARG00000055966	6.30349	1.22294	0.508539	2.40482	0.0161805	0.108124	0.966078	cflara
ENSDARG00000104584	12.0365	-1.05705	0.4396	-2.40457	0.0161913	0.108124	0.966078	-
ENSDARG00000006773	33.1103	-0.783136	0.325785	-2.40384	0.0162238	0.108268	0.965501	elovl4a
ENSDARG00000044073	21.0637	1.02438	0.426229	2.40337	0.016245	0.108336	0.965226	fuca2
ENSDARG00000032866	113.906	0.51526	0.214414	2.40311	0.0162563	0.108339	0.965216	erh
ENSDARG00000033171	16.4927	0.943426	0.392699	2.40242	0.0162871	0.108471	0.964685	trappc6bl
ENSDARG00000052816	78.077	0.610895	0.254392	2.40139	0.0163328	0.108702	0.96376	shmt1
ENSDARG00000069660	18.6425	0.877147	0.36535	2.40084	0.0163574	0.108793	0.9634	chrnb1
ENSDARG00000053446	440.822	0.364426	0.151909	2.39898	0.0164408	0.109261	0.961536	sub1a
ENSDARG00000056647	6.86211	1.16632	0.486212	2.39878	0.0164498	0.109261	0.961536	klhl3
ENSDARG00000026183	70.3178	0.582152	0.24284	2.39727	0.0165179	0.10964	0.960031	polr2eb
ENSDARG00000031494	61.3472	-0.571712	0.238636	-2.39575	0.0165864	0.110021	0.958524	prrc2a
ENSDARG00000062727	57.45	-0.659139	0.275221	-2.39494	0.016623	0.110119	0.958137	cep290
ENSDARG00000097351	15.1407	0.958974	0.400418	2.39493	0.0166234	0.110119	0.958137	flnb
ENSDARG00000103643	10.9534	1.04802	0.437663	2.39459	0.0166389	0.110148	0.958023	-
ENSDARG00000024492	219.856	0.393779	0.164508	2.39367	0.0166807	0.110221	0.957737	col9a2
ENSDARG00000037965	254.489	-0.37956	0.158572	-2.39361	0.0166833	0.110221	0.957737	srrm2
ENSDARG00000058734	36.5169	0.796353	0.332643	2.39402	0.0166649	0.110221	0.957737	prdx1
ENSDARG00000098822	71.272	0.53005	0.221483	2.39318	0.0167029	0.110277	0.957516	-
ENSDARG00000101135	6.69147	1.25547	0.524813	2.39222	0.0167467	0.110493	0.956666	-
ENSDARG00000099974	82.6945	-0.600727	0.251149	-2.39191	0.016761	0.110513	0.956585	ldb3b
ENSDARG00000028625	28.4471	-0.748385	0.313068	-2.39049	0.016826	0.110868	0.955192	jph2
ENSDARG00000042728	27.0579	0.776809	0.325071	2.38966	0.016864	0.111044	0.954503	plaa
ENSDARG00000009342	97.0046	-0.493826	0.206679	-2.38933	0.0168789	0.111069	0.954407	txndc5
ENSDARG00000038668	12.4732	1.03638	0.434083	2.38752	0.0169625	0.111545	0.95255	gbp1
ENSDARG00000057789	5.36866	1.24253	0.520709	2.38624	0.0170218	0.111861	0.951321	lyz
ENSDARG00000001788	105.967	0.494285	0.207221	2.38531	0.0170648	0.112045	0.950607	atp5o
ENSDARG00000013861	7.29282	-1.18635	0.497449	-2.38486	0.0170856	0.112045	0.950607	armc1
ENSDARG00000038467	7.95325	1.18844	0.498373	2.38464	0.0170959	0.112045	0.950607	igsf8
ENSDARG00000054058	95.9085	0.626349	0.26261	2.38509	0.017075	0.112045	0.950607	h1fx
ENSDARG00000061294	124.232	-0.435489	0.18264	-2.38441	0.0171064	0.112045	0.950607	arhgap5
ENSDARG00000010745	85.1846	0.565144	0.237329	2.38127	0.0172529	0.11293	0.947189	dnaja2l
ENSDARG00000009881	92.3631	0.512839	0.215531	2.37942	0.0173399	0.113408	0.945358	ier5
ENSDARG00000043304	134.074	-0.459847	0.193275	-2.37923	0.0173487	0.113408	0.945358	nop2
ENSDARG00000020609	60.9227	-0.586811	0.246828	-2.37741	0.0174349	0.113792	0.943889	snap25a
ENSDARG00000052379	27.3749	0.776569	0.326666	2.37726	0.017442	0.113792	0.943889	ccdc22
ENSDARG00000067741	15.5677	0.950603	0.399828	2.37753	0.0174291	0.113792	0.943889	-
ENSDARG00000017086	31.1767	0.753861	0.317285	2.37598	0.0175026	0.113813	0.943809	asb12a
ENSDARG00000019564	7.39162	-1.12578	0.473785	-2.37615	0.0174945	0.113813	0.943809	asap2b
ENSDARG00000021948	180.637	-0.437477	0.184082	-2.37653	0.0174763	0.113813	0.943809	tnc
ENSDARG00000033899	5.78199	-1.20349	0.506498	-2.3761	0.017497	0.113813	0.943809	ap2m1b
ENSDARG00000098114	13.8692	0.96677	0.406871	2.37611	0.0174963	0.113813	0.943809	-
ENSDARG00000016350	7.60443	-1.12568	0.473998	-2.37487	0.0175551	0.114079	0.942793	cap1
ENSDARG00000004517	22.6626	0.785195	0.330749	2.37399	0.0175969	0.114201	0.942328	ppat
ENSDARG00000009217	7.38208	-1.14211	0.48105	-2.37421	0.0175865	0.114201	0.942328	tom1l2
ENSDARG00000031795	522.091	-0.388425	0.163687	-2.37297	0.0176457	0.114368	0.941694	abcf1
ENSDARG00000040041	108.404	0.532974	0.224601	2.37298	0.0176453	0.114368	0.941694	mcm4
ENSDARG00000045075	9.50509	1.10865	0.467296	2.37248	0.0176693	0.114446	0.941398	tmem106a
ENSDARG00000063580	43.8838	-0.689228	0.29055	-2.37215	0.017685	0.114473	0.941296	si:ch1073-219n12.1
ENSDARG00000013681	24.1732	0.859324	0.362438	2.37095	0.0177423	0.114769	0.940174	si:dkey-42i9.6
ENSDARG00000042627	14.8688	-0.967249	0.408057	-2.37037	0.0177701	0.114874	0.939778	nhsl1b
ENSDARG00000078653	74.6987	-0.548648	0.231993	-2.36493	0.0180335	0.116501	0.933671	-
ENSDARG00000005738	89.3631	0.517742	0.218954	2.36462	0.0180487	0.116523	0.933589	rpf1
ENSDARG00000037350	1098.31	0.392	0.165799	2.36431	0.0180638	0.116544	0.933509	rpl9
ENSDARG00000098296	9.99739	-1.09175	0.46185	-2.36386	0.0180859	0.116611	0.933261	gnsb
ENSDARG00000003307	9.67835	-1.11542	0.47221	-2.36212	0.018171	0.116951	0.931997	stx16
ENSDARG00000008832	6.5822	-1.161	0.491673	-2.36133	0.0182094	0.116951	0.931997	neu1
ENSDARG00000055536	18.3014	0.846318	0.358233	2.36248	0.0181532	0.116951	0.931997	otub1a
ENSDARG00000059246	72.1476	-0.54077	0.228952	-2.36194	0.0181798	0.116951	0.931997	hnrnpd
ENSDARG00000061985	25.2699	0.804014	0.340489	2.36135	0.0182085	0.116951	0.931997	rbm47
ENSDARG00000069432	32.7219	0.691088	0.292633	2.36162	0.0181955	0.116951	0.931997	plscr3b
ENSDARG00000053395	78.9341	0.645025	0.273301	2.36013	0.0182685	0.117255	0.93087	cdkn2aipnl
ENSDARG00000105116	166.186	0.416646	0.176557	2.35984	0.0182828	0.11727	0.930813	p4hb
ENSDARG00000037846	76.1159	0.496803	0.210566	2.35937	0.0183061	0.117344	0.930539	hm13
ENSDARG00000089698	19.5408	-0.827226	0.35067	-2.35899	0.0183249	0.117389	0.930374	atf7ip2
ENSDARG00000058354	82.5936	-0.534375	0.226572	-2.35852	0.0183479	0.11746	0.930112	-
ENSDARG00000003151	204.619	0.455724	0.19325	2.35821	0.0183635	0.117484	0.930022	skp1
ENSDARG00000010516	2307.15	0.404083	0.171411	2.3574	0.0184036	0.117628	0.929488	rpl21
ENSDARG00000095147	28.8491	0.871994	0.369917	2.35727	0.0184098	0.117628	0.929488	krt96
ENSDARG00000060682	116.664	0.421971	0.179075	2.35638	0.0184538	0.117681	0.929292	agr1
ENSDARG00000078244	10.7445	-1.05405	0.44729	-2.35652	0.0184471	0.117681	0.929292	si:ch211-197l9.2
ENSDARG00000102147	11.3901	1.0361	0.439618	2.35683	0.0184317	0.117681	0.929292	-
ENSDARG00000039256	15.6709	-0.890541	0.378124	-2.35516	0.018515	0.117797	0.928866	spega
ENSDARG00000062531	24.7557	0.911877	0.38721	2.35499	0.018523	0.117797	0.928866	mapk8ip3
ENSDARG00000079148	18.2267	-0.983821	0.417831	-2.35459	0.0185432	0.117797	0.928866	nckap5l
ENSDARG00000088091	345.793	0.435501	0.184877	2.35562	0.0184918	0.117797	0.928866	pfn1
ENSDARG00000100636	39.8649	-0.628279	0.266809	-2.35479	0.0185334	0.117797	0.928866	rbm12
ENSDARG00000102407	23.6742	0.858843	0.364669	2.35513	0.0185162	0.117797	0.928866	cep97
ENSDARG00000078502	5.98382	1.18819	0.504678	2.35434	0.0185554	0.117799	0.928858	si:ch211-150o23.3
ENSDARG00000075433	96.8411	-0.480727	0.204288	-2.35318	0.0186137	0.118071	0.927856	myom2a
ENSDARG00000091086	7.28921	1.131	0.480663	2.35301	0.0186221	0.118071	0.927856	alx3
ENSDARG00000101471	14.0247	-1.01477	0.431505	-2.3517	0.0186877	0.118411	0.926607	fgd4a
ENSDARG00000089204	37.9234	0.674728	0.286961	2.35128	0.0187087	0.118469	0.926396	si:dkey-206d17.5
ENSDARG00000059583	5.36985	1.22823	0.52247	2.35081	0.0187328	0.118545	0.926116	rcc1l
ENSDARG00000078561	25.8569	-0.915244	0.389405	-2.35037	0.018755	0.118605	0.925898	lrig2
ENSDARG00000094133	52.6584	-0.562913	0.239523	-2.35014	0.0187661	0.118605	0.925898	wu:fc21g02
ENSDARG00000025309	8.27638	-1.1303	0.481023	-2.34979	0.0187839	0.118642	0.925762	dpf3
ENSDARG00000075456	19.2134	-0.823427	0.350546	-2.34898	0.0188247	0.118823	0.925098	pik3ca
ENSDARG00000044282	30.5683	-0.717968	0.305969	-2.34654	0.0189487	0.119469	0.922746	smc5
ENSDARG00000104431	177.507	0.440428	0.187696	2.34649	0.018951	0.119469	0.922746	slc1a3a
ENSDARG00000019834	10.9987	1.03713	0.442139	2.34571	0.018991	0.119568	0.922384	edrf1
ENSDARG00000034777	73.2095	0.555997	0.237011	2.34588	0.0189825	0.119568	0.922384	txn2
ENSDARG00000004174	187.275	0.510905	0.217852	2.3452	0.0190171	0.119657	0.922062	cnot1
ENSDARG00000090716	105.086	-0.447847	0.190988	-2.34489	0.0190325	0.119678	0.921987	cltcb
ENSDARG00000016775	88.4951	-0.552261	0.235676	-2.34331	0.0191136	0.119889	0.92122	aqr
ENSDARG00000021378	39.3946	-0.654137	0.279181	-2.34305	0.0191266	0.119889	0.92122	phf21ab
ENSDARG00000055429	31.2605	-0.800364	0.341463	-2.34392	0.019082	0.119889	0.92122	kat6b
ENSDARG00000076564	57.2778	-0.562455	0.240003	-2.34354	0.0191019	0.119889	0.92122	hspg2
ENSDARG00000089382	16.5584	-0.986535	0.421029	-2.34315	0.0191216	0.119889	0.92122	-
ENSDARG00000002720	33.9529	0.73884	0.315481	2.34194	0.0191836	0.120018	0.920752	utp15
ENSDARG00000052094	134.615	-0.520625	0.222296	-2.34204	0.0191788	0.120018	0.920752	notch1b
ENSDARG00000099458	45.4982	0.646429	0.275989	2.34223	0.019169	0.120018	0.920752	ddx46
ENSDARG00000019341	5.9128	-1.16359	0.496908	-2.34167	0.0191977	0.120031	0.920706	gpc1a
ENSDARG00000104149	18.0322	0.892658	0.381287	2.34117	0.0192235	0.120117	0.920397	-
ENSDARG00000021149	12.2869	0.97577	0.416882	2.34064	0.0192508	0.120211	0.920055	LOC792137; cbr1l
ENSDARG00000092359	46.7803	-0.645553	0.275968	-2.33923	0.0193234	0.120589	0.918694	si:dkeyp-113d7.10
ENSDARG00000055381	24.0258	0.782052	0.334373	2.33886	0.0193425	0.120632	0.918537	bambia
ENSDARG00000001733	10.5531	1.01216	0.432884	2.33818	0.019378	0.120777	0.918014	gulp1a
ENSDARG00000017988	8.37113	1.11677	0.47776	2.33751	0.0194129	0.120843	0.917778	dse
ENSDARG00000052061	170.719	-0.45451	0.194439	-2.33755	0.0194108	0.120843	0.917778	col4a6
ENSDARG00000079110	16.8408	-0.950364	0.406653	-2.33704	0.0194372	0.120918	0.917509	cluap1
ENSDARG00000078523	30.6445	0.878642	0.376021	2.33668	0.0194558	0.120958	0.917366	ddr1
ENSDARG00000100119	16.7468	0.905387	0.387539	2.33625	0.0194783	0.121022	0.917136	-
ENSDARG00000060697	155.725	-0.501757	0.214888	-2.33497	0.0195452	0.121361	0.91592	kmt2bb
ENSDARG00000041723	25.298	0.779836	0.334016	2.33473	0.0195575	0.121362	0.915918	zgc:153264; zgc:55461; zgc:123292
ENSDARG00000038826	20.7815	-0.852084	0.365053	-2.33414	0.0195883	0.121477	0.915505	jph1b
ENSDARG00000011094	50.474	0.670846	0.287488	2.33347	0.0196234	0.121555	0.915228	ccna2
ENSDARG00000077139	8.04326	-1.12492	0.482089	-2.33343	0.0196254	0.121555	0.915228	-
ENSDARG00000070055	17.462	-0.86463	0.370682	-2.33254	0.0196724	0.12177	0.914461	arfip1
ENSDARG00000009779	29.6307	0.746452	0.32011	2.33186	0.0197081	0.121883	0.914057	mcl1a
ENSDARG00000019420	11.1619	-1.05236	0.451337	-2.33165	0.0197191	0.121883	0.914057	etnk1
ENSDARG00000035559	100.164	-0.441342	0.189296	-2.33149	0.0197276	0.121883	0.914057	tp53
ENSDARG00000055416	11.3045	1.02206	0.43844	2.33112	0.0197472	0.121928	0.913896	serpinb1
ENSDARG00000024109	64.344	0.647039	0.277626	2.33061	0.0197737	0.121972	0.913741	naa40
ENSDARG00000059360	356.41	0.460893	0.197764	2.33052	0.0197788	0.121972	0.913741	srsf3b
ENSDARG00000019280	24.389	-0.750582	0.322422	-2.32795	0.0199148	0.12267	0.911261	-
ENSDARG00000096306	5.90486	1.17389	0.504267	2.32791	0.0199169	0.12267	0.911261	si:ch1073-342h5.2
ENSDARG00000077722	7.53572	-1.07182	0.461618	-2.32188	0.0202395	0.124502	0.904823	ppp2r3a
ENSDARG00000100056	11.4282	-1.07488	0.462926	-2.32193	0.0202368	0.124502	0.904823	scaf8
ENSDARG00000076379	5.32058	1.179	0.50799	2.32091	0.0202915	0.124745	0.903978	nsmce2
ENSDARG00000001549	21.3106	-0.854578	0.368444	-2.31942	0.020372	0.125016	0.903035	sp3a
ENSDARG00000060297	63.3663	-0.542219	0.233776	-2.3194	0.0203734	0.125016	0.903035	arhgap35b
ENSDARG00000092290	40.1942	-0.644436	0.277823	-2.31959	0.0203629	0.125016	0.903035	si:dkeyp-26a9.2
ENSDARG00000070961	9.41145	-1.08922	0.469832	-2.31832	0.0204318	0.125297	0.902061	lepr
ENSDARG00000079964	10.5677	1.00898	0.435312	2.31782	0.0204588	0.125385	0.901755	dlx2a
ENSDARG00000007359	12.4049	1.06328	0.458888	2.31707	0.0204998	0.125558	0.901156	zgc:56596
ENSDARG00000103129	70.6772	0.711383	0.307144	2.31612	0.0205518	0.125799	0.900324	-
ENSDARG00000071353	109.172	-0.480898	0.207716	-2.31517	0.0206035	0.126038	0.8995	si:ch211-235e9.8
ENSDARG00000016623	5.38503	-1.17854	0.509283	-2.31411	0.0206616	0.126315	0.898545	si:ch211-195b13.1
ENSDARG00000021265	84.224	-0.481426	0.208095	-2.3135	0.0206954	0.126423	0.898173	mybpc2b
ENSDARG00000076380	13.8899	-0.953638	0.412237	-2.31332	0.0207048	0.126423	0.898173	gzf1
ENSDARG00000091946	6.34441	-1.19187	0.515325	-2.31286	0.0207304	0.126501	0.897905	-
ENSDARG00000006639	21.3288	0.854572	0.369559	2.31241	0.020755	0.126545	0.897757	lnpb
ENSDARG00000013161	33.048	0.706775	0.305688	2.31208	0.0207733	0.126545	0.897757	zgc:55558
ENSDARG00000023648	24.816	0.83578	0.361491	2.31203	0.0207758	0.126545	0.897757	idh3g
ENSDARG00000060847	19.8575	-0.857813	0.37111	-2.31148	0.0208063	0.126639	0.897433	setd1ba
ENSDARG00000082979	18.871	-0.808882	0.34997	-2.31129	0.0208168	0.126639	0.897433	-
ENSDARG00000062476	13.7296	-0.945082	0.408951	-2.31099	0.0208334	0.126662	0.897353	snapc5
ENSDARG00000015638	20.5486	0.831306	0.359829	2.31028	0.0208726	0.126685	0.897274	gemin2
ENSDARG00000098458	3075.55	0.480794	0.208115	2.31023	0.0208756	0.126685	0.897274	zgc:171772
ENSDARG00000101543	6.5112	1.15564	0.500159	2.31055	0.0208579	0.126685	0.897274	-
ENSDARG00000038290	48.3413	0.624	0.270161	2.30974	0.0209028	0.126773	0.896974	thoc5
ENSDARG00000063309	12.2712	0.961429	0.416295	2.30949	0.0209163	0.126777	0.896958	tjp2a
ENSDARG00000074331	24.7213	-0.792365	0.343179	-2.3089	0.0209491	0.126898	0.896544	eif4g3b
ENSDARG00000063922	22.1134	-0.875647	0.379385	-2.30807	0.0209953	0.127035	0.896075	ND6
ENSDARG00000103929	30.6039	0.82149	0.355927	2.30803	0.0209974	0.127035	0.896075	ildr1a
ENSDARG00000078073	6.92682	1.14038	0.494171	2.30765	0.0210184	0.127085	0.895905	nudt5
ENSDARG00000021607	17.2981	-0.86782	0.376447	-2.30529	0.0211503	0.127804	0.893454	negr1
ENSDARG00000030278	35.9855	-0.703241	0.305277	-2.30362	0.0212441	0.128262	0.891904	idh3a
ENSDARG00000078233	97.9919	-0.456645	0.198261	-2.30325	0.0212647	0.128262	0.891904	ctnnd1
ENSDARG00000088805	190.045	-0.452245	0.196336	-2.30343	0.0212548	0.128262	0.891904	nes
ENSDARG00000104782	245.907	0.349619	0.151817	2.30289	0.0212849	0.128305	0.891757	oaz1b
ENSDARG00000009170	103.869	-0.442306	0.192094	-2.30255	0.021304	0.128342	0.89163	ctr9
ENSDARG00000060687	199.568	-0.370537	0.160982	-2.30173	0.0213503	0.128543	0.890952	chd2
ENSDARG00000012422	122.176	-0.443668	0.192775	-2.30148	0.0213644	0.12855	0.890929	col11a2
ENSDARG00000068217	4.93627	-1.18267	0.514169	-2.30016	0.0214389	0.128841	0.889945	stx2b
ENSDARG00000090190	224.911	0.434755	0.189004	2.30024	0.0214346	0.128841	0.889945	bcam
ENSDARG00000002632	14.0657	0.982042	0.426997	2.29988	0.0214552	0.128861	0.889878	anxa11b
ENSDARG00000032802	120.723	-0.491915	0.214053	-2.29811	0.0215557	0.129387	0.88811	ktn1
ENSDARG00000040072	13.1942	1.02081	0.444496	2.29656	0.0216441	0.129681	0.887123	scpep1
ENSDARG00000068246	19.1804	-0.8045	0.350259	-2.29688	0.0216259	0.129681	0.887123	plcb3
ENSDARG00000096639	36.2166	-0.713776	0.310796	-2.29661	0.0216412	0.129681	0.887123	-
ENSDARG00000009001	79.7357	0.603269	0.262761	2.29589	0.0216823	0.129686	0.887106	pdia6
ENSDARG00000059049	22.3069	0.819106	0.356776	2.29585	0.0216842	0.129686	0.887106	zgc:174904
ENSDARG00000099805	11.3466	1.09867	0.478456	2.29628	0.02166	0.129686	0.887106	LOC100332847
ENSDARG00000103222	13.3555	-0.964064	0.420066	-2.29503	0.0217314	0.129891	0.886423	-
ENSDARG00000014775	8.59318	-1.08102	0.47132	-2.2936	0.0218136	0.129912	0.886351	zgc:113220
ENSDARG00000016903	155.11	0.456034	0.198822	2.29368	0.0218089	0.129912	0.886351	wdr5
ENSDARG00000040024	14.3259	-0.914219	0.398537	-2.29394	0.0217939	0.129912	0.886351	gpd1l
ENSDARG00000090785	10.4713	-0.962184	0.419458	-2.29388	0.0217976	0.129912	0.886351	diaph3
ENSDARG00000102353	50.9241	0.719903	0.313789	2.29422	0.0217777	0.129912	0.886351	-
ENSDARG00000105400	7.1743	-1.18137	0.515041	-2.29374	0.0218053	0.129912	0.886351	si:ch73-368j24.14
ENSDARG00000035253	18.1809	-0.913414	0.398427	-2.29255	0.0218739	0.130192	0.885415	npr3
ENSDARG00000015222	15.426	0.961003	0.419304	2.2919	0.0219114	0.130338	0.884931	cbll1
ENSDARG00000016548	495.724	-0.383123	0.167189	-2.29155	0.0219316	0.130379	0.884793	eif5b
ENSDARG00000029596	8.25096	-1.05472	0.460363	-2.29107	0.0219595	0.130467	0.884499	trim55a
ENSDARG00000006112	7.2279	-1.15187	0.503136	-2.28938	0.0220571	0.130812	0.883354	myof
ENSDARG00000014680	9.24774	-1.03773	0.453257	-2.28949	0.0220507	0.130812	0.883354	znf710a
ENSDARG00000052923	5.25177	1.16581	0.509162	2.28966	0.022041	0.130812	0.883354	zgc:113162
ENSDARG00000018600	7.16022	1.1472	0.501152	2.28912	0.0220722	0.130823	0.883317	retsat
ENSDARG00000028800	8.15866	-1.13139	0.494311	-2.28881	0.0220902	0.130851	0.883223	si:dkey-283b15.4
ENSDARG00000018491	21.662	-0.771468	0.337183	-2.28798	0.0221388	0.130884	0.883114	pdia4
ENSDARG00000032317	171.567	-0.390706	0.17078	-2.28778	0.0221503	0.130884	0.883114	tox
ENSDARG00000044685	53.2796	0.687728	0.300694	2.28713	0.0221882	0.130884	0.883114	nr0b2a
ENSDARG00000052482	39.113	-0.624868	0.273058	-2.28841	0.0221139	0.130884	0.883114	arhgef11
ENSDARG00000062237	25.4684	0.749495	0.327682	2.28726	0.0221804	0.130884	0.883114	nfs1
ENSDARG00000063895	1071.83	-0.36771	0.160755	-2.28739	0.0221728	0.130884	0.883114	ND1
ENSDARG00000077492	32.5641	0.817527	0.357436	2.2872	0.0221841	0.130884	0.883114	atp8a2
ENSDARG00000073905	5.99507	1.16473	0.509548	2.28581	0.0222652	0.13126	0.881868	-
ENSDARG00000003531	163.262	0.455745	0.199455	2.28495	0.0223155	0.131447	0.88125	-
ENSDARG00000019426	62.1307	-0.620625	0.27163	-2.28482	0.0223234	0.131447	0.88125	trioa
ENSDARG00000069065	25.9347	0.760393	0.332961	2.28373	0.0223875	0.131746	0.880263	btg3
ENSDARG00000040287	751.25	0.3895	0.17061	2.28299	0.0224312	0.131857	0.879897	ywhabl
ENSDARG00000056499	17.8589	-0.980932	0.429676	-2.28296	0.022433	0.131857	0.879897	ca6
ENSDARG00000037109	30.5575	-0.705694	0.309192	-2.28238	0.0224667	0.131977	0.879503	pwp2h
ENSDARG00000011665	102.381	0.618629	0.271148	2.28152	0.0225179	0.132043	0.879286	aldoaa
ENSDARG00000015352	29.9238	-0.730895	0.320342	-2.28161	0.0225125	0.132043	0.879286	lsg1
ENSDARG00000058062	34.0554	0.675881	0.29622	2.28168	0.022508	0.132043	0.879286	magt1
ENSDARG00000002750	20.4878	-0.821995	0.360429	-2.2806	0.0225721	0.132262	0.878564	phf20a
ENSDARG00000102123	29.3587	0.780135	0.342099	2.28043	0.022582	0.132262	0.878564	phtf2
ENSDARG00000074332	154.626	-0.427458	0.187473	-2.28011	0.0226011	0.132296	0.878453	wu:fb69f10
ENSDARG00000057676	31.8814	0.694091	0.304491	2.27951	0.0226368	0.132427	0.878025	golga7
ENSDARG00000088347	10.7467	1.01271	0.444343	2.27911	0.0226607	0.132488	0.877823	sp1
ENSDARG00000029353	8.31022	1.09684	0.481612	2.27744	0.0227602	0.132991	0.876177	serpine2
ENSDARG00000059965	9.88512	-0.998598	0.43865	-2.27653	0.0228144	0.13323	0.875399	camsap2b
ENSDARG00000011890	8.22786	1.09344	0.480839	2.27402	0.0229649	0.134029	0.8728	cry4
ENSDARG00000075559	168.254	-0.366113	0.161086	-2.27278	0.0230393	0.134384	0.871651	ppm1g
ENSDARG00000015016	15.9593	-0.87756	0.386295	-2.27174	0.0231023	0.134673	0.870719	kif26ab
ENSDARG00000076557	13.6351	1.01155	0.44542	2.27099	0.0231473	0.134856	0.87013	bicc2
ENSDARG00000099453	50.9236	0.687319	0.302801	2.26987	0.0232156	0.135175	0.869105	elof1
ENSDARG00000016443	557.068	0.321809	0.141793	2.26957	0.0232337	0.1352	0.869022	eif3c
ENSDARG00000008247	7.91616	-1.03359	0.45555	-2.26889	0.0232749	0.135281	0.868762	vezf1a
ENSDARG00000100374	147.887	0.439172	0.193555	2.26897	0.02327	0.135281	0.868762	txnrd1
ENSDARG00000004574	7.79062	-1.0593	0.466951	-2.26854	0.0232965	0.13529	0.868735	gtf3c2
ENSDARG00000068036	14.5586	0.894358	0.394265	2.26842	0.0233037	0.13529	0.868735	tmem119b
ENSDARG00000057660	10.202	-1.02032	0.449975	-2.26751	0.0233594	0.135534	0.867953	dhx57
ENSDARG00000014854	11.3518	-0.973749	0.429488	-2.26723	0.0233761	0.135536	0.867945	reep1
ENSDARG00000036831	34.3407	0.661511	0.291794	2.26705	0.0233872	0.135536	0.867945	rnf41
ENSDARG00000035563	54.6116	0.613483	0.270681	2.26645	0.023424	0.135624	0.867663	znf703
ENSDARG00000098294	78.5801	-0.504346	0.222536	-2.26635	0.0234297	0.135624	0.867663	col5a3a
ENSDARG00000013763	155.944	-0.432341	0.190798	-2.26596	0.0234537	0.135684	0.867471	rrbp1a
ENSDARG00000053713	53.0198	-0.607516	0.268247	-2.26477	0.023527	0.136029	0.86637	ccdc88c
ENSDARG00000029075	41.1178	0.601101	0.265537	2.26372	0.0235915	0.136032	0.866358	pfkfb4b
ENSDARG00000040628	16.6162	0.885785	0.391209	2.26423	0.0235603	0.136032	0.866358	zgc:110333
ENSDARG00000044540	29.5125	0.695808	0.307385	2.26364	0.0235963	0.136032	0.866358	fkbp2
ENSDARG00000062506	121.873	-0.434869	0.192059	-2.26424	0.0235592	0.136032	0.866358	zc3h18
ENSDARG00000103730	47.0299	0.610326	0.269586	2.26394	0.0235781	0.136032	0.866358	-
ENSDARG00000052833	78.3238	-0.539902	0.238668	-2.26214	0.0236885	0.136473	0.864952	zfand3
ENSDARG00000058128	369.506	-0.295231	0.13052	-2.26195	0.0237004	0.136473	0.864952	msna
ENSDARG00000023323	516.361	-0.397023	0.175579	-2.26123	0.0237453	0.136653	0.864381	ywhaqb
ENSDARG00000041921	54.5958	0.530192	0.234523	2.26073	0.0237762	0.136751	0.864069	hsbp1b
ENSDARG00000069185	53.6624	-0.581486	0.257297	-2.25998	0.0238225	0.136938	0.863476	celsr1a
ENSDARG00000056206	73.0386	-0.495701	0.219409	-2.25926	0.0238675	0.137117	0.862909	camk2g2
ENSDARG00000009830	843.889	-0.276687	0.122498	-2.2587	0.0239021	0.137236	0.862532	hdlbpa
ENSDARG00000058371	807.825	0.379826	0.168225	2.25785	0.0239553	0.137462	0.861817	krt5
ENSDARG00000033604	38.9492	0.646895	0.286598	2.25715	0.0239988	0.137632	0.861281	lrpap1
ENSDARG00000005098	18.3645	-0.851039	0.377168	-2.25639	0.0240462	0.137824	0.860675	zgc:86764
ENSDARG00000059596	56.4474	-0.558937	0.247895	-2.25473	0.0241501	0.138339	0.859054	clip2
ENSDARG00000035699	82.3818	-0.510441	0.226436	-2.25424	0.0241809	0.138356	0.859002	srp19
ENSDARG00000053956	78.0102	-0.525025	0.232894	-2.25435	0.0241741	0.138356	0.859002	LOC558044
ENSDARG00000057986	16.4292	-0.837037	0.371453	-2.25341	0.0242332	0.138575	0.858314	ints8
ENSDARG00000002571	25.263	-0.793955	0.352531	-2.25216	0.0243123	0.138773	0.857694	tmod2
ENSDARG00000009285	2381.48	0.431635	0.191621	2.25254	0.0242881	0.138773	0.857694	rpl15
ENSDARG00000034056	77.1496	-0.487968	0.216684	-2.25197	0.0243239	0.138773	0.857694	csnk1g2b
ENSDARG00000043046	24.7945	0.748408	0.332307	2.25216	0.0243124	0.138773	0.857694	fbxl5
ENSDARG00000070187	104.637	-0.47103	0.209254	-2.25099	0.0243859	0.139047	0.856838	dyrk1b
ENSDARG00000013704	26.1259	-0.836422	0.371673	-2.25043	0.0244219	0.139112	0.856635	cers2a
ENSDARG00000044545	114.4	0.432254	0.192081	2.25037	0.0244253	0.139112	0.856635	zgc:77262
ENSDARG00000010721	45.4924	-0.639581	0.284265	-2.24995	0.0244523	0.139149	0.856519	42984
ENSDARG00000098311	8.67335	1.02215	0.454328	2.2498	0.0244614	0.139149	0.856519	si: zfos-932h1.3
ENSDARG00000101744	60.7627	0.604237	0.268597	2.24961	0.024474	0.139149	0.856519	hug
ENSDARG00000069339	9.35026	1.02685	0.45665	2.24866	0.0245341	0.139411	0.855702	tbc1d24
ENSDARG00000008030	68.7308	0.511995	0.227794	2.24763	0.0246001	0.139706	0.854785	myl9b
ENSDARG00000075923	9.62749	-0.987517	0.439513	-2.24684	0.0246502	0.13991	0.854151	si:ch1073-179p4.3
ENSDARG00000017049	50.3961	0.59413	0.264629	2.24515	0.0247588	0.140446	0.85249	adsl
ENSDARG00000006878	67.785	-0.514488	0.229214	-2.24457	0.0247957	0.140491	0.852351	phf21aa
ENSDARG00000010002	21.1367	-0.856897	0.3818	-2.24436	0.0248093	0.140491	0.852351	gna11a
ENSDARG00000045911	18.286	-0.886774	0.395098	-2.24444	0.0248039	0.140491	0.852351	tulp4a
ENSDARG00000018534	199.449	-0.374366	0.166863	-2.24356	0.0248607	0.140702	0.851699	slc6a9
ENSDARG00000002536	31.8747	0.66536	0.296654	2.24288	0.0249043	0.140788	0.851434	tm9sf4
ENSDARG00000088790	18.812	-1.00457	0.447888	-2.24291	0.0249027	0.140788	0.851434	-
ENSDARG00000002467	7.87408	1.10186	0.491512	2.24178	0.0249754	0.141062	0.850591	rdh14b
ENSDARG00000071197	8.48144	-1.05585	0.471003	-2.24169	0.0249812	0.141062	0.850591	usp40
ENSDARG00000002013	19.9067	-0.787314	0.35126	-2.2414	0.0250005	0.141076	0.850548	grb10a
ENSDARG00000035023	13.428	0.922576	0.411641	2.24122	0.0250121	0.141076	0.850548	kiaa0907
ENSDARG00000102375	12.0214	-0.930202	0.415164	-2.24056	0.0250543	0.141233	0.850063	-
ENSDARG00000054666	27.6916	-0.790534	0.352928	-2.23993	0.0250955	0.141385	0.849596	pgpep1
ENSDARG00000068213	16.6782	-0.877638	0.391865	-2.23965	0.025114	0.141409	0.849524	fzd10
ENSDARG00000040991	14.6439	-0.921389	0.412099	-2.23584	0.0253619	0.142464	0.846294	cttnbp2
ENSDARG00000045877	183.595	0.395807	0.177025	2.23588	0.0253593	0.142464	0.846294	ube2nb
ENSDARG00000056713	17.936	-0.829256	0.37095	-2.23549	0.0253852	0.142464	0.846294	pskh1
ENSDARG00000058292	26.253	0.741534	0.331583	2.23634	0.0253294	0.142464	0.846294	sephs1
ENSDARG00000059337	193.727	0.413415	0.184936	2.23545	0.0253877	0.142464	0.846294	tgif1
ENSDARG00000098730	35.5164	0.667791	0.298669	2.23589	0.0253592	0.142464	0.846294	en1b
ENSDARG00000100435	17.9262	0.847057	0.379134	2.23419	0.0254706	0.142849	0.845124	sec22bb
ENSDARG00000041306	15.8095	0.900084	0.402996	2.23348	0.0255173	0.14303	0.844573	mrps25
ENSDARG00000006031	19.06	0.824107	0.369221	2.23202	0.0256138	0.143362	0.843565	abat
ENSDARG00000030644	5.42145	-1.14065	0.511059	-2.23192	0.02562	0.143362	0.843565	gnai3
ENSDARG00000036684	17.2857	0.90846	0.406953	2.23235	0.0255921	0.143362	0.843565	ndufa7
ENSDARG00000045516	48.3608	0.670559	0.30056	2.23104	0.0256788	0.14361	0.842815	itih2
ENSDARG00000004078	60.857	0.513891	0.230484	2.22961	0.0257733	0.143976	0.84171	acsl4a
ENSDARG00000062542	31.4985	-0.712222	0.319416	-2.22976	0.0257632	0.143976	0.84171	fgf12b
ENSDARG00000099768	21.6583	-0.769531	0.345181	-2.22935	0.0257903	0.14399	0.841667	-
ENSDARG00000044491	18.5779	-0.845604	0.379426	-2.22864	0.0258378	0.144174	0.841114	kif20a
ENSDARG00000056099	12.5604	0.96704	0.434066	2.22786	0.0258898	0.14436	0.840554	gtf2h5
ENSDARG00000078751	46.7595	0.696235	0.312535	2.2277	0.0259002	0.14436	0.840554	tpp2
ENSDARG00000034885	11.1497	0.982782	0.441293	2.22705	0.0259438	0.144521	0.840068	bet1
ENSDARG00000101919	9.34974	1.02246	0.459249	2.22637	0.0259896	0.144695	0.839547	foxj1a
ENSDARG00000004023	10.5463	0.982109	0.441244	2.22577	0.0260294	0.14478	0.83929	isl1
ENSDARG00000037789	433.243	-0.78527	0.352819	-2.2257	0.0260342	0.14478	0.83929	pvalb1
ENSDARG00000043732	26.716	0.726242	0.326468	2.22454	0.0261119	0.145069	0.838426	cops4
ENSDARG00000061841	8.40924	1.04711	0.470718	2.22449	0.0261153	0.145069	0.838426	tiparp
ENSDARG00000104028	48.1467	-0.576991	0.259472	-2.22371	0.026168	0.14528	0.837794	si:dkey-74k8.3
ENSDARG00000018049	195.868	0.390617	0.175772	2.2223	0.0262633	0.145664	0.836647	sf3b2
ENSDARG00000042990	12.0767	0.932607	0.419669	2.22225	0.0262666	0.145664	0.836647	cyp2p10
ENSDARG00000059473	9.22902	-1.03565	0.466099	-2.22195	0.0262868	0.145695	0.836555	kank4
ENSDARG00000010085	10.4917	1.02643	0.462456	2.21952	0.0264512	0.146125	0.835275	p4ha2
ENSDARG00000014041	46.4034	-0.633901	0.285606	-2.2195	0.0264529	0.146125	0.835275	smarcad1a
ENSDARG00000020377	219.638	-0.42595	0.19185	-2.22022	0.0264035	0.146125	0.835275	eif4g2a
ENSDARG00000030368	105.3	-0.435888	0.196337	-2.2201	0.0264119	0.146125	0.835275	naa15b
ENSDARG00000056075	26.1821	-0.703794	0.317034	-2.21993	0.0264235	0.146125	0.835275	rca2.1
ENSDARG00000096457	14.1852	0.92604	0.417083	2.22028	0.0264	0.146125	0.835275	si:dkey-118j18.2
ENSDARG00000070723	46.6508	0.593284	0.267345	2.21917	0.0264752	0.146167	0.835151	-
ENSDARG00000051874	38.2713	0.622086	0.280364	2.21885	0.0264968	0.146204	0.83504	stra6
ENSDARG00000045437	12.1502	0.936894	0.422305	2.21852	0.0265191	0.146246	0.834915	slc35b3
ENSDARG00000089505	50.3231	-0.65724	0.296308	-2.2181	0.0265482	0.146325	0.834682	bod1l1
ENSDARG00000037009	234.654	-0.340083	0.15338	-2.21726	0.0266054	0.146478	0.834229	banf1
ENSDARG00000098679	8.65582	1.05824	0.477228	2.21748	0.0265906	0.146478	0.834229	nup85
ENSDARG00000102571	339.335	0.338875	0.152873	2.21671	0.0266431	0.146603	0.833856	metap2b
ENSDARG00000013434	15.7305	-0.897325	0.404954	-2.21587	0.0267004	0.14678	0.833333	hira
ENSDARG00000057983	8.35092	1.03445	0.466851	2.21581	0.0267048	0.14678	0.833333	svopl
ENSDARG00000032929	20.651	-0.882901	0.398568	-2.21518	0.0267474	0.146851	0.833122	cryba1l1
ENSDARG00000042961	22.0019	0.831643	0.375419	2.21524	0.0267437	0.146851	0.833122	zgc:100920
ENSDARG00000018903	185.914	0.381682	0.17239	2.21406	0.0268244	0.147141	0.832267	aimp2
ENSDARG00000070256	24.1368	-0.732319	0.33077	-2.21399	0.0268298	0.147141	0.832267	suz12a
ENSDARG00000061121	42.1496	0.63031	0.284819	2.21302	0.0268963	0.147424	0.831432	adgrl3.1
ENSDARG00000101209	49.9833	0.638519	0.28858	2.21262	0.0269236	0.147492	0.831232	lamb1a
ENSDARG00000058148	125.7	-0.473374	0.214179	-2.21018	0.027093	0.148313	0.82882	dnajc7
ENSDARG00000102317	2183.11	0.441563	0.1998	2.21002	0.0271034	0.148313	0.82882	rpl26
ENSDARG00000019326	20.5443	0.794814	0.359909	2.20838	0.027218	0.148858	0.827229	prpsap2
ENSDARG00000104105	37.9327	-0.771779	0.349548	-2.20794	0.0272487	0.148943	0.826979	ttf2
ENSDARG00000098800	13.7457	0.971394	0.440003	2.2077	0.0272653	0.148952	0.826953	znf1156
ENSDARG00000069696	17.7926	-0.817216	0.370303	-2.20688	0.0273224	0.149182	0.826285	si:ch211-261n11.5
ENSDARG00000029150	7083.42	0.422543	0.191586	2.2055	0.0274192	0.149628	0.824988	hsp90ab1
ENSDARG00000076283	60.8871	0.526572	0.238936	2.20382	0.0275371	0.150189	0.823363	snrpd3l
ENSDARG00000056903	23.0214	0.766469	0.34792	2.203	0.0275946	0.15037	0.822838	mrpl13
ENSDARG00000077383	31.3134	0.724009	0.32866	2.20291	0.0276008	0.15037	0.822838	anxa11a
ENSDARG00000041182	1688.94	0.340597	0.154635	2.20259	0.0276239	0.150414	0.822713	rpl4
ENSDARG00000069113	46.009	-0.615666	0.279647	-2.20158	0.0276951	0.150718	0.821834	dbn1
ENSDARG00000042187	120.945	-0.423011	0.192191	-2.20099	0.027737	0.150857	0.821434	smek1
ENSDARG00000057321	9.52022	1.0337	0.469694	2.20079	0.0277511	0.150857	0.821434	tut1
ENSDARG00000097797	35.8883	0.707302	0.32142	2.20055	0.0277676	0.150864	0.821413	tomm6
ENSDARG00000040442	77.2162	-0.647651	0.294497	-2.19918	0.0278654	0.151313	0.820124	-
ENSDARG00000077901	14.8708	-0.972746	0.442643	-2.19759	0.0279786	0.151761	0.818839	herc1
ENSDARG00000080372	12.3551	-0.964179	0.43874	-2.19761	0.027977	0.151761	0.818839	-
ENSDARG00000008637	15.4337	0.865115	0.393893	2.19632	0.0280692	0.152086	0.81791	mtp
ENSDARG00000009607	32.5685	0.724951	0.330057	2.19644	0.0280602	0.152086	0.81791	ccnc
ENSDARG00000078864	18.8797	-0.768837	0.350485	-2.19364	0.0282613	0.153043	0.815186	lats2
ENSDARG00000061798	13.4361	-0.923532	0.421082	-2.19324	0.0282903	0.153117	0.814977	arhgap27l
ENSDARG00000006395	217.232	-0.424542	0.193742	-2.19127	0.0284324	0.15355	0.813749	rbm25b
ENSDARG00000010160	1208.47	0.401273	0.183092	2.19165	0.0284047	0.15355	0.813749	rps15a
ENSDARG00000100582	150.47	0.452182	0.206355	2.19128	0.0284319	0.15355	0.813749	si:ch211-195b11.3
ENSDARG00000102806	18.5143	-0.976238	0.445467	-2.19149	0.0284161	0.15355	0.813749	si:dkey-23a13.16; zgc:112234
ENSDARG00000020217	20.2032	0.767875	0.350501	2.19079	0.028467	0.15357	0.813694	cpsf4
ENSDARG00000074201	137.793	0.507531	0.231653	2.19091	0.0284581	0.15357	0.813694	flna
ENSDARG00000035596	23.5167	0.743569	0.339445	2.19054	0.0284851	0.153584	0.813654	si:ch211-191d15.2
ENSDARG00000056531	318.679	0.452325	0.206575	2.18964	0.0285501	0.153851	0.812901	nutf2
ENSDARG00000014571	369.771	-0.316548	0.144596	-2.18919	0.0285831	0.153945	0.812635	ctnnb1
ENSDARG00000029764	155.418	-0.388994	0.177723	-2.18877	0.0286138	0.154026	0.812405	mef2ca
ENSDARG00000018061	28.7615	-0.744012	0.340054	-2.18792	0.0286754	0.154274	0.811707	neil1
ENSDARG00000062558	20.8532	0.875299	0.40016	2.18737	0.0287154	0.154342	0.811517	rspry1
ENSDARG00000079780	180.634	-0.363302	0.166095	-2.18732	0.0287191	0.154342	0.811517	-
ENSDARG00000053831	23.1708	0.721063	0.32987	2.1859	0.0288227	0.154815	0.810187	vtnb
ENSDARG00000070046	67.2451	0.512368	0.234422	2.18567	0.0288398	0.154823	0.810165	eny2
ENSDARG00000079765	6.72	-1.09287	0.500077	-2.1854	0.0288597	0.154846	0.810101	si:ch211-112f3.4
ENSDARG00000019713	12.3329	0.94627	0.433155	2.1846	0.0289182	0.155075	0.809457	-
ENSDARG00000015540	8.83542	1.06357	0.486985	2.18399	0.028963	0.155232	0.80902	psen2
ENSDARG00000063068	18.3596	-0.835117	0.382421	-2.18376	0.0289796	0.155236	0.809006	-
ENSDARG00000044521	687.081	0.439458	0.201298	2.18312	0.0290266	0.155405	0.808536	eef1b2
ENSDARG00000012040	55.4497	-0.574218	0.263059	-2.18285	0.0290468	0.155429	0.808469	rnf19a
ENSDARG00000015292	58.4866	-0.547774	0.250999	-2.18237	0.0290821	0.155534	0.808175	ube2g1a
ENSDARG00000024895	62.9503	0.550002	0.252067	2.18197	0.029112	0.155609	0.807964	fam50a
ENSDARG00000056334	7.33197	-1.08793	0.498937	-2.18051	0.02922	0.156102	0.806591	mlh3
ENSDARG00000060501	12.356	0.910116	0.417596	2.17942	0.0293006	0.156449	0.805628	dpcd
ENSDARG00000021975	16.8923	0.869388	0.399233	2.17764	0.0294325	0.156496	0.805497	ginm1
ENSDARG00000027182	18.9578	0.807935	0.371001	2.17772	0.0294272	0.156496	0.805497	rnf25
ENSDARG00000035131	12.4687	-0.972179	0.446181	-2.17889	0.0293399	0.156496	0.805497	surf4l
ENSDARG00000038785	24.4536	-0.783279	0.359663	-2.17781	0.02942	0.156496	0.805497	abcf2a
ENSDARG00000045886	14.0947	-0.888883	0.408052	-2.17836	0.0293796	0.156496	0.805497	slc38a2
ENSDARG00000057273	7.16821	-1.07435	0.493195	-2.17834	0.0293807	0.156496	0.805497	alox5a
ENSDARG00000100170	16.3382	0.831773	0.381967	2.1776	0.0294358	0.156496	0.805497	pam
ENSDARG00000101755	9.34984	-0.984424	0.451806	-2.17887	0.0293416	0.156496	0.805497	prkar1ab
ENSDARG00000102154	5.54983	1.09611	0.503671	2.17624	0.0295371	0.156951	0.804237	si:dkey-262g12.10
ENSDARG00000071468	56.6754	0.565269	0.259896	2.17498	0.0296319	0.15737	0.803079	mrpl54
ENSDARG00000000241	62.9842	0.490118	0.225393	2.1745	0.0296674	0.157474	0.802791	slc40a1
ENSDARG00000062109	14.5633	0.919354	0.422867	2.1741	0.029698	0.157552	0.802576	shdb
ENSDARG00000001557	19.2363	-0.843596	0.388117	-2.17356	0.0297382	0.157681	0.802221	tomm34
ENSDARG00000060506	19.8462	0.800751	0.36855	2.17271	0.0298023	0.157852	0.80175	sos2
ENSDARG00000097848	22.3567	0.756266	0.34805	2.17286	0.0297907	0.157852	0.80175	-
ENSDARG00000004074	37.4109	-0.644757	0.296948	-2.17128	0.02991	0.158338	0.800416	bach2b
ENSDARG00000026180	103.945	0.459207	0.211705	2.16908	0.0300763	0.159048	0.798471	prpf8
ENSDARG00000038151	10.0658	0.984391	0.453805	2.16919	0.0300682	0.159048	0.798471	zgc:92360
ENSDARG00000104938	92.4499	-0.477834	0.220402	-2.16801	0.0301579	0.159394	0.797527	ftsj3
ENSDARG00000075467	22.9287	0.727175	0.33567	2.16634	0.0302853	0.159982	0.795928	shisa3
ENSDARG00000027200	6.33745	1.09683	0.506541	2.16533	0.0303625	0.160305	0.795052	gabarapl2
ENSDARG00000043371	64.6671	0.597325	0.275908	2.16495	0.0303917	0.160374	0.794866	mdh2
ENSDARG00000104267	209.078	0.352441	0.162855	2.16414	0.0304538	0.160616	0.794212	postnb
ENSDARG00000023445	23.3601	-0.730865	0.337909	-2.16291	0.0305484	0.161029	0.793096	atp2b3b
ENSDARG00000021086	24.7252	0.759142	0.351114	2.16209	0.0306109	0.161273	0.792439	znf367
ENSDARG00000079687	300.69	-0.306821	0.141947	-2.16153	0.0306547	0.161418	0.792049	rnf10
ENSDARG00000008141	61.6023	0.493061	0.228152	2.16111	0.0306871	0.161503	0.79182	rbl1
ENSDARG00000097615	44.7338	-1.03507	0.479123	-2.16035	0.0307458	0.161644	0.791439	si:ch211-108d22.2
ENSDARG00000100497	36.2414	-0.784845	0.363298	-2.16034	0.0307467	0.161644	0.791439	hic2
ENSDARG00000054259	59.6778	-0.522759	0.242071	-2.15953	0.0308091	0.161887	0.790788	nat10
ENSDARG00000022817	12.7834	-0.982182	0.454884	-2.15919	0.0308353	0.161938	0.79065	pvalb3
ENSDARG00000020008	241.998	-0.420755	0.194897	-2.15886	0.0308613	0.161989	0.790514	vcp
ENSDARG00000100133	44.5529	-0.599358	0.277681	-2.15844	0.0308936	0.162073	0.79029	lect1
ENSDARG00000055383	35.7138	-0.636675	0.295111	-2.15741	0.0309737	0.162407	0.789396	zgc:66160
ENSDARG00000008447	80.1425	-0.435554	0.202057	-2.1556	0.0311145	0.162887	0.788114	fkbp4
ENSDARG00000043485	89.4525	0.464933	0.215679	2.15567	0.0311094	0.162887	0.788114	si:ch211-22i13.2
ENSDARG00000054451	14.8923	0.937056	0.434633	2.15597	0.031086	0.162887	0.788114	loxl1
ENSDARG00000016010	21.7322	0.7741	0.35923	2.15489	0.0311708	0.163096	0.787558	nup107
ENSDARG00000067850	20.3437	0.808225	0.37517	2.15429	0.0312174	0.163253	0.787139	jund
ENSDARG00000015998	33.8904	-0.64323	0.298753	-2.15305	0.0313151	0.163677	0.786011	wdhd1
ENSDARG00000037654	12.5869	0.922008	0.428532	2.15155	0.0314328	0.164206	0.78461	pmm2
ENSDARG00000028058	27.9663	-0.646673	0.300688	-2.15065	0.0315042	0.164245	0.784509	traf6
ENSDARG00000033852	30.8565	-0.626247	0.291194	-2.15062	0.0315065	0.164245	0.784509	-
ENSDARG00000100913	71.5508	-0.495523	0.230367	-2.15102	0.0314747	0.164245	0.784509	arhgef12b
ENSDARG00000101989	8.45737	-1.03077	0.479258	-2.15077	0.0314944	0.164245	0.784509	thrap3a
ENSDARG00000078890	7.86581	-0.995694	0.463223	-2.14949	0.0315956	0.164621	0.783516	wdfy3
ENSDARG00000100003	173.767	0.441723	0.205521	2.14928	0.0316118	0.164621	0.783516	glulb
ENSDARG00000079326	45.9142	-0.645407	0.300321	-2.14906	0.0316298	0.164628	0.783497	-
ENSDARG00000056438	39.5913	0.720069	0.335288	2.14761	0.0317445	0.165138	0.782152	her9
ENSDARG00000101106	12.7398	-0.901867	0.420167	-2.14645	0.0318374	0.165534	0.781112	si:ch73-109d9.3
ENSDARG00000013371	8.24215	-1.01692	0.473832	-2.14616	0.0318604	0.165567	0.781026	isoc2
ENSDARG00000098280	43.355	-0.633138	0.295058	-2.14581	0.0318884	0.165626	0.780872	-
ENSDARG00000002369	120.85	0.476	0.221913	2.14498	0.0319543	0.165794	0.780431	-
ENSDARG00000070426	52.0664	0.588541	0.274356	2.14518	0.0319388	0.165794	0.780431	chac1
ENSDARG00000038694	14.2051	0.848093	0.395593	2.14385	0.0320446	0.166117	0.779587	zgc:101744
ENSDARG00000054007	23.6565	-0.797815	0.372152	-2.14379	0.0320499	0.166117	0.779587	ppp1r2
ENSDARG00000011533	10.3337	-0.927045	0.432658	-2.14267	0.0321393	0.166406	0.778832	sema6dl
ENSDARG00000023536	145.327	-0.390011	0.182012	-2.14277	0.0321313	0.166406	0.778832	nnt
ENSDARG00000076321	97.1265	-0.556698	0.259874	-2.14219	0.0321786	0.166522	0.778528	col28a2a
ENSDARG00000020497	19.6088	0.750317	0.350364	2.14153	0.032231	0.166706	0.778048	rab7
ENSDARG00000104230	68.772	0.488309	0.228049	2.14125	0.0322541	0.166739	0.777963	sec23a
ENSDARG00000061992	6.0048	-1.08988	0.509344	-2.13976	0.0323738	0.16727	0.776581	dot1l
ENSDARG00000101813	958.951	-0.277208	0.129578	-2.13931	0.0324108	0.167374	0.776312	nap1l1
ENSDARG00000008372	56.0302	-0.596878	0.279202	-2.1378	0.0325328	0.167829	0.775132	spred2b
ENSDARG00000039381	8.0353	1.03393	0.483599	2.13798	0.0325182	0.167829	0.775132	ch25hl1.1
ENSDARG00000096849	97.2367	0.55418	0.25933	2.13697	0.0326006	0.168092	0.774454	-
ENSDARG00000013979	18.2287	0.819444	0.383596	2.13621	0.0326621	0.168234	0.774087	ndfip1
ENSDARG00000025375	37.6524	0.653945	0.306109	2.13632	0.0326537	0.168234	0.774087	idh1
ENSDARG00000014313	70.223	0.528686	0.247653	2.13478	0.0327788	0.168747	0.772764	atp5j
ENSDARG00000002644	7.11205	-1.02121	0.478608	-2.13371	0.0328662	0.168992	0.772134	rgs5a
ENSDARG00000055455	176.716	-0.347693	0.162979	-2.13337	0.0328946	0.168992	0.772134	gpm6aa
ENSDARG00000056938	12.6536	0.959171	0.449541	2.13367	0.0328698	0.168992	0.772134	kera
ENSDARG00000069261	11.75	-0.879475	0.412212	-2.13355	0.0328798	0.168992	0.772134	metap2a
ENSDARG00000086216	21.1068	0.792213	0.371391	2.1331	0.0329167	0.169018	0.772068	prr13
ENSDARG00000042520	126.612	-0.429638	0.201552	-2.13164	0.0330361	0.169543	0.77072	si:dkey-251i10.3
ENSDARG00000092033	25.1018	-0.685197	0.321493	-2.13129	0.0330649	0.169603	0.770566	-
ENSDARG00000015343	14.3833	0.861717	0.404476	2.13045	0.0331343	0.169783	0.770105	pgd
ENSDARG00000043334	37.9261	0.623744	0.292758	2.13058	0.0331238	0.169783	0.770105	ccdc6a
ENSDARG00000102640	155.399	0.427342	0.200615	2.13016	0.0331583	0.169818	0.770015	pdia3
ENSDARG00000077073	6.86597	-1.01699	0.477486	-2.12989	0.0331804	0.169844	0.769951	tanc1a
ENSDARG00000038910	27.0518	0.680311	0.31948	2.12943	0.0332184	0.169927	0.769738	pccb
ENSDARG00000054362	53.5962	-0.524865	0.246499	-2.12928	0.0332309	0.169927	0.769738	ccdc47
ENSDARG00000040564	177.639	-0.372515	0.175008	-2.12856	0.0332909	0.170033	0.769468	hnrnpul1
ENSDARG00000061974	7.00459	-0.994489	0.467221	-2.12852	0.0332941	0.170033	0.769468	grhl2b
ENSDARG00000091768	11.6797	-0.900867	0.423258	-2.12841	0.0333031	0.170033	0.769468	dclre1a
ENSDARG00000052897	8.06041	-1.02828	0.483185	-2.12813	0.033326	0.170062	0.769393	atxn2
ENSDARG00000004754	53.3698	-0.561236	0.263868	-2.12696	0.0334237	0.170473	0.768344	hspa4a
ENSDARG00000076532	6041.94	-0.244567	0.115029	-2.12614	0.0334913	0.170554	0.768137	si:ch211-222l21.1
ENSDARG00000089836	43.0837	0.586357	0.275764	2.1263	0.0334785	0.170554	0.768137	si:dkey-17e16.10
ENSDARG00000105630	30.6821	-0.667791	0.314064	-2.12629	0.0334793	0.170554	0.768137	alpk3b
ENSDARG00000041959	11.1587	0.971292	0.456946	2.12561	0.0335355	0.170652	0.767889	cxcr4b
ENSDARG00000074321	6.19162	-1.07705	0.506818	-2.12511	0.0335771	0.170652	0.767889	tead3a
ENSDARG00000078318	13.187	0.881476	0.414876	2.12467	0.0336137	0.170652	0.767889	tmod1
ENSDARG00000089957	6.86246	-1.04243	0.490546	-2.12504	0.033583	0.170652	0.767889	lgi2a
ENSDARG00000101139	14.6238	0.918841	0.432442	2.12477	0.0336056	0.170652	0.767889	agpat2
ENSDARG00000104835	31.4069	-0.616806	0.290276	-2.12489	0.0335956	0.170652	0.767889	map3k4
ENSDARG00000016393	290.429	-0.428645	0.201778	-2.12434	0.0336416	0.170706	0.767752	arf2b
ENSDARG00000014572	42.4941	0.640303	0.301458	2.12402	0.0336687	0.170756	0.767624	chpt1
ENSDARG00000052470	10.4029	0.989162	0.466286	2.12136	0.0338913	0.171797	0.764985	igfbp2a
ENSDARG00000075461	101.481	-0.463902	0.218772	-2.12048	0.0339656	0.172051	0.764343	-
ENSDARG00000102569	6.20611	-1.05961	0.499732	-2.12035	0.0339761	0.172051	0.764343	-
ENSDARG00000057577	17.7839	0.793422	0.374283	2.11985	0.0340189	0.172179	0.764019	mbtps2
ENSDARG00000037929	19.4957	0.778354	0.367352	2.11882	0.0341053	0.172459	0.763314	strada
ENSDARG00000086819	5.08278	-1.08726	0.513153	-2.11878	0.0341089	0.172459	0.763314	scn1a
ENSDARG00000063358	19.8503	-0.763927	0.360636	-2.11828	0.0341515	0.172506	0.763195	micu1
ENSDARG00000076075	5.36276	-1.0723	0.50622	-2.11826	0.0341531	0.172506	0.763195	-
ENSDARG00000015495	24.14	0.741004	0.349982	2.11727	0.0342373	0.172816	0.762415	klf3
ENSDARG00000063144	6.69194	-1.01465	0.479258	-2.11712	0.0342494	0.172816	0.762415	shisa7b
ENSDARG00000045316	20.5795	0.847134	0.400231	2.11661	0.0342928	0.172859	0.762307	map7d2b
ENSDARG00000077093	74.8504	-0.454994	0.214944	-2.1168	0.0342769	0.172859	0.762307	scaf4a
ENSDARG00000060987	6.67985	1.06149	0.501584	2.11628	0.034321	0.172914	0.762171	zgc:154077
ENSDARG00000018574	35.0984	0.607298	0.287072	2.11549	0.0343882	0.173164	0.761542	sf3b4
ENSDARG00000071272	54.1529	-0.564285	0.266773	-2.11522	0.0344108	0.17319	0.761477	ncoa6
ENSDARG00000003705	29.1617	0.706333	0.333987	2.11485	0.0344428	0.173263	0.761294	prnprs3
ENSDARG00000063182	32.1376	-0.602272	0.284815	-2.11461	0.0344633	0.173278	0.761256	rc3h1b
ENSDARG00000075252	192.839	-0.43044	0.203645	-2.11368	0.0345422	0.173587	0.760483	phrf1
ENSDARG00000028982	39.4011	-0.590882	0.279687	-2.11265	0.0346304	0.173942	0.759596	pcca
ENSDARG00000103137	14.5721	0.835297	0.395506	2.11197	0.0346893	0.174149	0.759078	rmi2
ENSDARG00000002523	18.4816	0.828979	0.392557	2.11174	0.0347084	0.174157	0.759059	hsdl2
ENSDARG00000033840	13.6788	-0.895047	0.423938	-2.11127	0.0347493	0.174203	0.758944	fat3a
ENSDARG00000077855	7.59395	1.04495	0.494957	2.11119	0.0347561	0.174203	0.758944	znrf2a
ENSDARG00000086996	5.76876	1.08539	0.514152	2.11102	0.0347703	0.174203	0.758944	si:ch73-234b20.5
ENSDARG00000054907	23.792	0.700141	0.331755	2.11042	0.0348224	0.174376	0.758514	cox7a3
ENSDARG00000055022	50.8281	-0.541312	0.256714	-2.10862	0.0349774	0.174887	0.757242	pds5a
ENSDARG00000060637	6.99537	-1.05048	0.498149	-2.10876	0.0349653	0.174887	0.757242	clstn2
ENSDARG00000078322	62.4976	-0.516066	0.244706	-2.10892	0.0349515	0.174887	0.757242	col12a1a
ENSDARG00000025699	52.2256	-0.642797	0.305054	-2.10715	0.0351042	0.175421	0.755918	-
ENSDARG00000100057	35.0674	-0.641855	0.304633	-2.10698	0.0351196	0.175421	0.755918	ppfibp1b
ENSDARG00000033259	40.3264	-0.589212	0.27993	-2.10485	0.035304	0.176253	0.753863	dis3l2
ENSDARG00000102418	18.5367	0.769345	0.365558	2.10458	0.0353281	0.176285	0.753786	klhl25
ENSDARG00000039483	10.3321	0.942512	0.448003	2.10381	0.0353952	0.176442	0.753398	si:dkey-51a16.9
ENSDARG00000099517	15.711	0.877762	0.417195	2.10396	0.0353819	0.176442	0.753398	-
ENSDARG00000003308	61.7612	0.570086	0.271026	2.10344	0.0354274	0.176514	0.753222	emc2
ENSDARG00000023627	34.3135	-0.661868	0.314916	-2.10173	0.0355769	0.177169	0.751611	ggps1
ENSDARG00000017602	22.7129	0.784661	0.373524	2.1007	0.0356674	0.177441	0.750945	ccng2
ENSDARG00000037318	110.42	-0.43058	0.204964	-2.10076	0.0356617	0.177441	0.750945	ddost
ENSDARG00000105409	178.858	-0.438474	0.208751	-2.10046	0.0356882	0.177456	0.750908	zgc:163040; hist1h4l
ENSDARG00000101465	15.4096	0.821646	0.391258	2.10001	0.0357279	0.177564	0.750644	-
ENSDARG00000099280	50.6256	-0.561905	0.267611	-2.09971	0.0357544	0.177607	0.75054	utp20
ENSDARG00000039960	20.6141	0.851473	0.405618	2.0992	0.0357995	0.177742	0.75021	-
ENSDARG00000058259	20.7466	-0.775199	0.36936	-2.09876	0.0358378	0.177843	0.749963	celsr1b
ENSDARG00000083519	359.307	-0.362613	0.172827	-2.09813	0.0358936	0.178003	0.749573	-
ENSDARG00000087869	25.3133	-0.822415	0.392001	-2.09799	0.0359059	0.178003	0.749573	si:ch211-11k18.4
[truncated: 29,702 more rows]
[truncated: 1 more columns]

## Sheet: Table S4-Cig+DMP
	baseMean	log2FoldChange	lfcSE	stat	pvalue	padj	"=-LOG10" Padj	Gene Symbol
ENSDARG00000059227	953.699	3.95443	0.291181	13.5807	5.21354e-42	7.21032e-38	37.142	fabp1b.1
ENSDARG00000058358	1222.17	2.6126	0.203281	12.8522	8.36479e-38	5.78425e-34	33.2378	krt8
ENSDARG00000002768	145.844	-4.47835	0.357148	-12.5392	4.55541e-36	2.10004e-32	31.6778	pvalb2
ENSDARG00000079376	322.049	4.06612	0.333481	12.193	3.38828e-34	1.1715e-30	29.9313	zgc:174153
ENSDARG00000041490	855.463	3.56675	0.296776	12.0183	2.84682e-33	7.8743e-30	29.1038	LOC568656
ENSDARG00000100697	201.007	4.16187	0.350804	11.8638	1.82478e-32	4.20611e-29	28.3761	-
ENSDARG00000019122	1422.96	2.34787	0.20143	11.656	2.13761e-31	4.22331e-28	27.3743	he1b
ENSDARG00000070426	224.16	3.25442	0.279899	11.6271	3.00093e-31	5.18785e-28	27.285	chac1
ENSDARG00000036834	1003.36	2.91278	0.252797	11.5222	1.01936e-30	1.56641e-27	26.8051	cki; krt92
ENSDARG00000101334	231.683	3.80462	0.331707	11.4698	1.8705e-30	2.58691e-27	26.5872	ctsc
ENSDARG00000074667	232.837	3.02535	0.266477	11.3531	7.15584e-30	8.99684e-27	26.0459	akt1s1
ENSDARG00000062262	77.9993	3.85105	0.342116	11.2566	2.14986e-29	2.47772e-26	25.6059	ednrab
ENSDARG00000007795	249.142	2.96404	0.264125	11.2221	3.17502e-29	3.37774e-26	25.4714	cst3
ENSDARG00000035602	99.7663	3.10008	0.27803	11.1502	7.14766e-29	7.06086e-26	25.1511	dao.1
ENSDARG00000063921	544.704	-2.39345	0.221566	-10.8024	3.35262e-27	3.09112e-24	23.5099	ND5
ENSDARG00000068457	145.518	-3.49744	0.324528	-10.777	4.4214e-27	3.82175e-24	23.4177	tnnt3b
ENSDARG00000068478	220.064	2.92863	0.276595	10.5881	3.38237e-26	2.75166e-23	22.5604	gpx4a
ENSDARG00000018404	493.477	2.0532	0.201441	10.1926	2.14023e-24	1.64441e-21	20.784	krt18
ENSDARG00000079009	198.976	2.36497	0.236004	10.0209	1.23389e-23	8.98145e-21	20.0467	abca1b
ENSDARG00000053457	1487.28	1.70575	0.170465	10.0065	1.42762e-23	9.72305e-21	20.0122	rpl23
ENSDARG00000067995	74.6303	-3.05856	0.30576	-10.0031	1.47639e-23	9.72305e-21	20.0122	myhz1.2
ENSDARG00000090850	171.728	2.69186	0.270056	9.9678	2.10842e-23	1.32543e-20	19.8776	serpina1l
ENSDARG00000071331	47.3531	-3.67732	0.372387	-9.87497	5.34475e-23	3.21382e-20	19.493	-
ENSDARG00000015822	110.68	2.81519	0.292508	9.62431	6.31289e-22	3.6378e-19	18.4392	sesn3
ENSDARG00000068507	42.8474	-4.02197	0.421495	-9.54216	1.39888e-21	7.73859e-19	18.1113	crybb1
ENSDARG00000011405	2209.98	2.20359	0.231329	9.52579	1.63792e-21	8.71249e-19	18.0599	rps9
ENSDARG00000077456	68.0912	-2.71784	0.289351	-9.39286	5.83916e-21	2.99095e-18	17.5242	zgc:110216
ENSDARG00000013430	1473.65	2.76009	0.29509	9.35338	8.48898e-21	4.19295e-18	17.3775	bhmt
ENSDARG00000060977	153.815	2.28373	0.2457	9.29482	1.47455e-20	7.03208e-18	17.1529	zgc:153018
ENSDARG00000025581	1599.44	1.38725	0.150391	9.22431	2.85396e-20	1.31568e-17	16.8809	rpl10
ENSDARG00000089355	75.3019	-2.53056	0.274622	-9.21472	3.12105e-20	1.39239e-17	16.8562	si:dkeyp-121d4.3
ENSDARG00000016598	137.199	2.84655	0.30964	9.19309	3.81724e-20	1.64976e-17	16.7826	ckmt1
ENSDARG00000051735	52.8573	-3.01688	0.330082	-9.13978	6.25818e-20	2.62275e-17	16.5812	si:ch211-113a14.18
ENSDARG00000070546	69.257	3.332	0.364871	9.132	6.7245e-20	2.73529e-17	16.563	msgn1
ENSDARG00000053684	562.423	2.45661	0.272726	9.00761	2.10588e-19	8.32123e-17	16.0798	aldob
ENSDARG00000036239	285.705	2.70271	0.300491	8.99431	2.37722e-19	8.88567e-17	16.0513	gatm
ENSDARG00000036298	1736.03	1.33579	0.148499	8.99531	2.35558e-19	8.88567e-17	16.0513	rps13
ENSDARG00000040442	49.5784	-3.54453	0.398765	-8.88876	6.17932e-19	2.24895e-16	15.648	-
ENSDARG00000020574	1917.05	-2.28155	0.258822	-8.81512	1.19555e-18	4.23962e-16	15.3727	atp2a1
ENSDARG00000008494	115.38	2.54907	0.289608	8.80179	1.34652e-18	4.6556e-16	15.332	myl6
ENSDARG00000063910	176.047	-2.71808	0.3097	-8.77649	1.68652e-18	5.6889e-16	15.245	ATP8
ENSDARG00000006427	154.951	2.36566	0.26974	8.77015	1.78428e-18	5.87537e-16	15.231	fabp2
ENSDARG00000033999	48.4269	3.74769	0.429568	8.72432	2.67786e-18	8.61273e-16	15.0649	cyp26a1
ENSDARG00000040295	1003.44	1.84266	0.212495	8.67151	4.26444e-18	1.34039e-15	14.8728	apoeb
ENSDARG00000016771	680.751	2.38345	0.275255	8.65906	4.7565e-18	1.46183e-15	14.8351	-
ENSDARG00000040439	305.924	1.80309	0.208605	8.64356	5.4487e-18	1.63816e-15	14.7856	rsl24d1
ENSDARG00000098803	89.7906	2.4505	0.283633	8.63967	5.63781e-18	1.65895e-15	14.7802	cyp2aa8
ENSDARG00000092807	6648.83	1.62438	0.188256	8.62857	6.21224e-18	1.7899e-15	14.7472	-
ENSDARG00000006019	248.648	2.2138	0.258075	8.57813	9.6426e-18	2.72158e-15	14.5652	tktb
ENSDARG00000086222	105.843	-2.05432	0.239713	-8.5699	1.03577e-17	2.86493e-15	14.5429	nat16
ENSDARG00000028213	2947.43	-1.69421	0.197785	-8.56595	1.07184e-17	2.90658e-15	14.5366	-
ENSDARG00000019778	3003.99	1.32342	0.154592	8.56073	1.12157e-17	2.98295e-15	14.5254	rps6
ENSDARG00000058479	109.545	-2.09108	0.245129	-8.53055	1.45654e-17	3.80074e-15	14.4201	zgc:110425
ENSDARG00000018961	145.074	1.85	0.216982	8.52608	1.51388e-17	3.87722e-15	14.4115	gtpbp4
ENSDARG00000067990	527.259	-2.56626	0.3024	-8.4863	2.13328e-17	5.36423e-15	14.2705	myhz1.1
ENSDARG00000038559	764.77	2.06072	0.243298	8.46996	2.45483e-17	6.06256e-15	14.2173	h1f0
ENSDARG00000012076	989.067	2.84526	0.341053	8.34256	7.26997e-17	1.76392e-14	13.7535	apoa1a
ENSDARG00000091446	75.2288	-3.07232	0.370354	-8.29565	1.07995e-16	2.57513e-14	13.5892	zgc:163040; hist1h4l
ENSDARG00000045248	1870.68	1.36238	0.165477	8.23305	1.82499e-16	4.27789e-14	13.3688	h3f3d
ENSDARG00000092693	2583.1	1.37089	0.166813	8.21811	2.06735e-16	4.76525e-14	13.3219	tpt1
ENSDARG00000040027	70.6225	3.10963	0.378631	8.21284	2.16019e-16	4.89762e-14	13.31	osbpl10b
ENSDARG00000099104	2078.22	1.67218	0.204333	8.18359	2.7551e-16	6.14565e-14	13.2114	rpl24
ENSDARG00000020956	61.0483	2.84264	0.348038	8.16761	3.14548e-16	6.90508e-14	13.1608	pck2
ENSDARG00000014587	249.189	1.66858	0.204833	8.14604	3.7604e-16	8.12599e-14	13.0901	slc38a5b
ENSDARG00000034273	37.3009	3.47067	0.426293	8.14152	3.90341e-16	8.30526e-14	13.0806	sid4
ENSDARG00000030602	1895.63	1.28986	0.158831	8.12099	4.62397e-16	9.68931e-14	13.0137	rps19
ENSDARG00000021242	149.334	1.9406	0.2403	8.07572	6.70794e-16	1.38464e-13	12.8587	mvp
ENSDARG00000054818	2187.6	1.18352	0.146593	8.0735	6.83127e-16	1.38936e-13	12.8572	rpl32
ENSDARG00000025073	3056.11	1.33915	0.166177	8.05859	7.71823e-16	1.547e-13	12.8105	rpl18a
ENSDARG00000037789	284.142	-4.14612	0.519528	-7.98055	1.45683e-15	2.83774e-13	12.547	pvalb1
ENSDARG00000096257	96.7088	-2.23641	0.280219	-7.98091	1.45258e-15	2.83774e-13	12.547	-
ENSDARG00000013623	529.782	1.99626	0.250418	7.97169	1.56521e-15	3.0065e-13	12.5219	vdac2
ENSDARG00000034897	2016.77	1.46815	0.18457	7.95445	1.79925e-15	3.40872e-13	12.4674	rps10
ENSDARG00000011701	98.6446	2.34494	0.29539	7.93844	2.0474e-15	3.82642e-13	12.4172	ctsll
ENSDARG00000032405	346.518	2.34956	0.296038	7.93667	2.07684e-15	3.8297e-13	12.4168	zgc:85975
ENSDARG00000096992	177.781	-2.07831	0.262682	-7.91188	2.53527e-15	4.61353e-13	12.336	zgc:153405
ENSDARG00000093022	200.217	1.86606	0.237271	7.8647	3.69998e-15	6.64554e-13	12.1775	seph
ENSDARG00000041619	2206.72	1.37736	0.176657	7.79683	6.34842e-15	1.12562e-12	11.9486	gnb2l1
ENSDARG00000099101	37.8942	-3.54915	0.455568	-7.7906	6.66901e-15	1.1675e-12	11.9327	gch2
ENSDARG00000102241	71.2145	2.89041	0.371531	7.77973	7.26772e-15	1.25641e-12	11.9009	zgc:136410
ENSDARG00000000563	2590.31	-1.63182	0.210676	-7.74563	9.51123e-15	1.62395e-12	11.7894	-
ENSDARG00000099351	33.4739	3.72492	0.481006	7.74401	9.63303e-15	1.62469e-12	11.7892	igfbp1a
ENSDARG00000006691	1452.38	1.28334	0.166256	7.71909	1.17161e-14	1.95221e-12	11.7095	rpl12
ENSDARG00000036832	2247.99	1.62822	0.212165	7.67428	1.66347e-14	2.73879e-12	11.5624	cyt1l
ENSDARG00000036237	82.1763	2.30985	0.301802	7.65354	1.95526e-14	3.13907e-12	11.5032	slc27a2a
ENSDARG00000037997	228.054	-2.29726	0.300134	-7.65411	1.94653e-14	3.13907e-12	11.5032	tubb5
ENSDARG00000043453	1973.19	1.12784	0.147386	7.65227	1.97468e-14	3.13907e-12	11.5032	rps5
ENSDARG00000030270	236.373	-1.76065	0.23041	-7.64141	2.14856e-14	3.37665e-12	11.4715	tnnt3a
ENSDARG00000007320	1980.06	1.09032	0.144097	7.56659	3.83146e-14	5.95383e-12	11.2252	rpl7
ENSDARG00000036875	3281.87	1.2927	0.171537	7.53598	4.84696e-14	7.44816e-12	11.128	rps12
ENSDARG00000041435	1607.42	1.33692	0.177449	7.53413	4.91618e-14	7.47151e-12	11.1266	uba52
ENSDARG00000059053	85.042	2.69191	0.358107	7.51707	5.60185e-14	8.42105e-12	11.0746	slc13a4
ENSDARG00000019949	308.441	2.31798	0.308816	7.50605	6.09402e-14	9.0624e-12	11.0428	serpinh1b
ENSDARG00000015662	101.257	1.84718	0.246701	7.4875	7.01983e-14	1.03281e-11	10.986	pla2g12b
ENSDARG00000053973	916.447	2.23514	0.299048	7.47417	7.7692e-14	1.13103e-11	10.9465	fetub
ENSDARG00000035860	1502.52	1.2864	0.172579	7.45398	9.05668e-14	1.30473e-11	10.8845	rps28
ENSDARG00000093702	338.876	2.17696	0.294537	7.39114	1.45579e-13	2.07562e-11	10.6829	si:dkey-126g1.9
ENSDARG00000091905	22.32	-3.46133	0.468734	-7.38443	1.5311e-13	2.16073e-11	10.6654	si:dkey-108k21.21
ENSDARG00000027249	730.284	1.236	0.167735	7.36877	1.7221e-13	2.40573e-11	10.6188	btg1
ENSDARG00000003081	48.0403	-2.23366	0.303448	-7.36093	1.82629e-13	2.52576e-11	10.5976	mybphb
ENSDARG00000008363	102.958	2.63021	0.35772	7.3527	1.94246e-13	2.65983e-11	10.5751	mcl1b
ENSDARG00000105177	507.887	-1.41077	0.192353	-7.33428	2.22912e-13	3.02242e-11	10.5196	ilf3b
ENSDARG00000061379	27.056	-3.10213	0.423213	-7.32995	2.30234e-13	3.0914e-11	10.5098	cmya5
ENSDARG00000053254	1987.08	-1.69261	0.232094	-7.2928	3.03574e-13	4.03696e-11	10.3939	mylpfa
ENSDARG00000057556	1468.96	1.18403	0.162391	7.29124	3.07113e-13	4.04511e-11	10.3931	rpl17
ENSDARG00000011648	343.118	1.33243	0.183167	7.27438	3.48006e-13	4.5405e-11	10.3429	snrpd1
ENSDARG00000005236	147.672	-1.91839	0.264406	-7.25549	4.00224e-13	5.17299e-11	10.2863	srcap
ENSDARG00000036044	1937.04	1.56352	0.21579	7.24556	4.30646e-13	5.51466e-11	10.2585	-
ENSDARG00000105590	109.211	2.11752	0.292485	7.23973	4.49579e-13	5.7043e-11	10.2438	si:cabz01007794.1
ENSDARG00000034291	2944.8	1.34638	0.18705	7.19796	6.11198e-13	7.68443e-11	10.1144	rpl37
ENSDARG00000099499	342.452	1.39875	0.195033	7.17187	7.39784e-13	9.21731e-11	10.0354	ndufa4l
ENSDARG00000019644	798.832	1.78226	0.249067	7.15574	8.32216e-13	1.02764e-10	9.98816	ldhba
ENSDARG00000097224	29.1043	-2.7859	0.390074	-7.14198	9.19984e-13	1.12596e-10	9.94848	-
ENSDARG00000057903	175.768	-1.53516	0.215791	-7.11411	1.1264e-12	1.3665e-10	9.86439	-
ENSDARG00000103791	517.409	1.66878	0.235939	7.07292	1.51711e-12	1.82449e-10	9.73886	nme2b.1
ENSDARG00000055539	36.686	2.83676	0.401231	7.07013	1.54785e-12	1.84541e-10	9.73391	epdl2
ENSDARG00000013961	100.735	2.01821	0.285726	7.06345	1.62419e-12	1.91987e-10	9.71673	slc31a1
ENSDARG00000023656	643.836	1.85881	0.264104	7.03818	1.94761e-12	2.28267e-10	9.64156	he1a
ENSDARG00000012987	51.437	2.38059	0.338765	7.02727	2.10608e-12	2.44765e-10	9.61125	gpia
ENSDARG00000104375	104.036	2.02659	0.292383	6.93127	4.17067e-12	4.8067e-10	9.31815	sec24a
ENSDARG00000004169	299.873	-1.33087	0.192569	-6.91113	4.80814e-12	5.49559e-10	9.25999	stmn1a
ENSDARG00000018637	401.177	1.58199	0.22898	6.90886	4.88564e-12	5.53839e-10	9.25662	sec61g
ENSDARG00000036316	1169.73	1.14807	0.166385	6.90007	5.1978e-12	5.84435e-10	9.23326	rpl39
ENSDARG00000100452	378.668	1.53683	0.223223	6.88472	5.78998e-12	6.4577e-10	9.18992	nop53
ENSDARG00000045132	303.395	2.13405	0.312311	6.83309	8.31059e-12	9.19484e-10	9.03646	vdac1
ENSDARG00000061249	69.11	-2.31681	0.340271	-6.80871	9.84789e-12	1.08092e-09	8.96621	myom1a
ENSDARG00000077291	2856.37	1.18312	0.174249	6.78983	1.12262e-11	1.22251e-09	8.91275	rps2
ENSDARG00000033539	122.562	2.05507	0.303091	6.78038	1.19857e-11	1.29502e-09	8.88772	paics
ENSDARG00000052746	66.2614	2.096	0.310597	6.74828	1.49613e-11	1.60399e-09	8.7948	grinab
ENSDARG00000104279	473.609	1.27162	0.188766	6.73648	1.6227e-11	1.7263e-09	8.76288	appa
ENSDARG00000046157	1352.71	1.06977	0.159619	6.702	2.05588e-11	2.17045e-09	8.66345	zgc:114188
ENSDARG00000061120	442.916	1.70694	0.255457	6.68193	2.35822e-11	2.47077e-09	8.60717	slc43a2b
ENSDARG00000032327	270.304	1.52547	0.228564	6.67416	2.48649e-11	2.58558e-09	8.58744	usp36
ENSDARG00000015164	232.794	2.09743	0.314331	6.67268	2.51177e-11	2.59237e-09	8.5863	mknk2b
ENSDARG00000031317	72.4658	2.45362	0.36788	6.66962	2.56469e-11	2.62738e-09	8.58048	ppdpfb
ENSDARG00000013931	286.48	1.23676	0.185657	6.66153	2.70992e-11	2.75575e-09	8.55976	eif3m
ENSDARG00000016691	75.5226	2.08456	0.313452	6.65033	2.92427e-11	2.95202e-09	8.52988	cd9b
ENSDARG00000075482	15.9924	-3.79721	0.573334	-6.62302	3.51923e-11	3.52688e-09	8.45261	zgc:173587; zgc:114046
ENSDARG00000017744	110.95	-1.54409	0.234856	-6.5746	4.87829e-11	4.85373e-09	8.31392	smc2
ENSDARG00000078941	33.6325	-2.81939	0.429926	-6.55786	5.45859e-11	5.39231e-09	8.26823	zgc:112234; ano9a
ENSDARG00000070568	112.955	-1.52554	0.232778	-6.55365	5.61482e-11	5.5073e-09	8.25906	atad5a
ENSDARG00000099776	142.627	1.7895	0.273235	6.5493	5.78077e-11	5.63014e-09	8.24948	glula
ENSDARG00000042236	502.51	-1.26848	0.193866	-6.54306	6.02731e-11	5.82921e-09	8.23439	atrx
ENSDARG00000091090	13.4115	-4.14852	0.635854	-6.52433	6.83077e-11	6.54574e-09	8.18404	-
ENSDARG00000102452	244.538	1.37739	0.21114	6.52362	6.86285e-11	6.54574e-09	8.18404	eif3ha
ENSDARG00000053365	2274.52	1.04999	0.161032	6.52034	7.01482e-11	6.64486e-09	8.17751	rpl31
ENSDARG00000041232	2302.39	1.11404	0.170952	6.51668	7.18798e-11	6.76257e-09	8.16989	rps29
ENSDARG00000077777	3425.5	0.930612	0.143232	6.49724	8.18067e-11	7.6445e-09	8.11665	tmsb4x
ENSDARG00000019765	305.149	1.65047	0.254394	6.48787	8.70555e-11	8.08039e-09	8.09257	zgc:158803
ENSDARG00000045269	36.0422	-2.747	0.425095	-6.46208	1.03276e-10	9.52206e-09	8.02127	-
ENSDARG00000029069	119.377	-2.35116	0.363995	-6.45931	1.05179e-10	9.63329e-09	8.01623	tnni2a.4
ENSDARG00000008502	230.339	1.48788	0.230848	6.44531	1.15367e-10	1.04969e-08	7.97894	pno1
ENSDARG00000094324	305.527	1.48685	0.231358	6.42664	1.30454e-10	1.17921e-08	7.92841	efemp2a
ENSDARG00000014867	2384.41	0.973301	0.152684	6.37462	1.83412e-10	1.64713e-08	7.78327	rpl8
ENSDARG00000022372	31.7921	2.46247	0.386456	6.37191	1.86683e-10	1.6657e-08	7.7784	kng1
ENSDARG00000104373	387.517	1.99606	0.314718	6.34239	2.26234e-10	2.00565e-08	7.69774	si:zfos-932h1.6
ENSDARG00000042566	1443.09	0.948938	0.149804	6.33453	2.38063e-10	2.09708e-08	7.67839	rps7
ENSDARG00000102674	136.549	-1.57834	0.249959	-6.31438	2.71253e-10	2.37432e-08	7.62446	ckap5
ENSDARG00000076312	70.2871	-1.91128	0.302753	-6.313	2.73681e-10	2.38051e-08	7.62333	myot
ENSDARG00000006385	14.8064	4.04493	0.642103	6.29951	2.98589e-10	2.58093e-08	7.58822	-
ENSDARG00000022767	1738.07	1.36987	0.217585	6.29579	3.05835e-10	2.62714e-08	7.58052	apobb.1
ENSDARG00000055510	29.3652	2.66961	0.424252	6.29252	3.12346e-10	2.66651e-08	7.57406	ypel3
ENSDARG00000003599	4548.14	0.878944	0.139734	6.29014	3.1718e-10	2.67476e-08	7.57272	rpl3
ENSDARG00000029500	1249.95	0.991396	0.15759	6.291	3.15427e-10	2.67476e-08	7.57272	rpl34
ENSDARG00000002589	224.15	-1.71468	0.272646	-6.28903	3.19453e-10	2.6776e-08	7.57225	mylpfb
ENSDARG00000094041	242.387	1.77161	0.281745	6.28799	3.21601e-10	2.67936e-08	7.57197	krt17
ENSDARG00000019181	3361.32	1.27625	0.203146	6.28241	3.33362e-10	2.76071e-08	7.55898	rpsa
ENSDARG00000021257	258.976	1.44036	0.229447	6.27754	3.4398e-10	2.81792e-08	7.55007	eif3d
ENSDARG00000091001	70.2093	1.89183	0.301374	6.27737	3.44344e-10	2.81792e-08	7.55007	-
ENSDARG00000013475	602.716	1.26074	0.201372	6.26074	3.83164e-10	3.09892e-08	7.50879	cct4
ENSDARG00000039515	148.78	1.66969	0.266659	6.26152	3.81237e-10	3.09892e-08	7.50879	atf4a
ENSDARG00000077717	2358.63	1.1389	0.182642	6.23573	4.49669e-10	3.61565e-08	7.44181	rpl29
ENSDARG00000017445	441.238	1.15299	0.185805	6.20536	5.45718e-10	4.36259e-08	7.36026	eif3i
ENSDARG00000005230	380.507	1.12143	0.180884	6.19971	5.6568e-10	4.49618e-08	7.34716	ssr2
ENSDARG00000105208	16.7194	3.72134	0.600434	6.19775	5.72768e-10	4.52651e-08	7.34424	zgc:85843
ENSDARG00000036670	27.3757	2.95858	0.478319	6.18537	6.19555e-10	4.86843e-08	7.31261	aplnrb
ENSDARG00000076223	125.462	1.45653	0.235753	6.1782	6.48374e-10	5.06611e-08	7.29533	zgc:92744
ENSDARG00000016651	149.803	-1.35186	0.219149	-6.16868	6.88622e-10	5.31538e-08	7.27447	znf106a
ENSDARG00000053269	9.22183	-4.25264	0.689473	-6.16795	6.91807e-10	5.31538e-08	7.27447	slc2a15b
ENSDARG00000100422	96.7373	1.8185	0.294791	6.16876	6.88257e-10	5.31538e-08	7.27447	ptpro
ENSDARG00000022101	91.835	-1.63158	0.264644	-6.16519	7.03979e-10	5.37902e-08	7.2693	-
ENSDARG00000061100	285.136	2.16725	0.351757	6.16122	7.2188e-10	5.48549e-08	7.26078	nars
ENSDARG00000051718	29.2049	-2.5844	0.42056	-6.14514	7.98951e-10	6.03797e-08	7.21911	si:ch211-113a14.24
ENSDARG00000012682	330.383	-1.08502	0.176597	-6.14407	8.04328e-10	6.04557e-08	7.21856	pfn2l
ENSDARG00000069583	84.8335	2.13372	0.348182	6.12818	8.88885e-10	6.60929e-08	7.17985	zgc:114181
ENSDARG00000078878	27.1501	-2.31495	0.377714	-6.12883	8.85272e-10	6.60929e-08	7.17985	-
ENSDARG00000040565	363.736	-1.34059	0.218885	-6.12464	9.08883e-10	6.72185e-08	7.17251	ckmb
ENSDARG00000069142	209.16	1.57945	0.258167	6.11795	9.47875e-10	6.97293e-08	7.15658	aars
ENSDARG00000063626	317.774	1.72648	0.282399	6.11361	9.74035e-10	7.12746e-08	7.14707	ddx21
ENSDARG00000039547	83.3028	-2.52745	0.413493	-6.11243	9.81246e-10	7.14244e-08	7.14615	si:ch211-113a14.22
ENSDARG00000000069	86.9494	1.56784	0.256835	6.10446	1.0315e-09	7.46895e-08	7.12674	dap
ENSDARG00000021987	483.261	-1.17915	0.193416	-6.09647	1.08437e-09	7.77594e-08	7.10925	si:ch211-165e15.1
ENSDARG00000058105	3100.24	1.09005	0.178804	6.09635	1.08515e-09	7.77594e-08	7.10925	rpl36a
ENSDARG00000009285	3116.91	1.11179	0.182699	6.08539	1.16207e-09	8.28422e-08	7.08175	rpl15
ENSDARG00000032929	14.0369	-3.68417	0.608295	-6.05655	1.3907e-09	9.86324e-08	7.00598	cryba1l1
ENSDARG00000039185	138.089	1.49165	0.24825	6.00866	1.87067e-09	1.31997e-07	6.87944	nfyba
ENSDARG00000023160	91.2505	1.61236	0.26858	6.00328	1.93368e-09	1.3575e-07	6.86726	snrnp40
ENSDARG00000037870	2483.94	1.42014	0.237221	5.98656	2.14326e-09	1.49704e-07	6.82477	actb2
ENSDARG00000101082	140.308	1.4118	0.236087	5.98	2.23131e-09	1.5507e-07	6.80947	eif3s6ip
ENSDARG00000078859	14.0318	3.91571	0.656341	5.96598	2.43172e-09	1.68153e-07	6.77429	g0s2
ENSDARG00000007836	460.982	1.47472	0.247666	5.95445	2.60942e-09	1.79544e-07	6.74583	ctsla
ENSDARG00000001721	257.21	1.75226	0.294991	5.94005	2.84939e-09	1.94124e-07	6.71192	oc90
ENSDARG00000024295	41.7597	2.16437	0.364322	5.94082	2.83604e-09	1.94124e-07	6.71192	-
ENSDARG00000010244	727.282	1.13996	0.19194	5.93915	2.86503e-09	1.94232e-07	6.71168	rpl22l1
ENSDARG00000090228	54.658	1.70162	0.2868	5.93314	2.97194e-09	2.00497e-07	6.69789	gsta.1
ENSDARG00000007024	27.3336	2.86286	0.48337	5.92271	3.16682e-09	2.12607e-07	6.67242	-
ENSDARG00000098646	77.4111	2.36889	0.401963	5.89331	3.78537e-09	2.52907e-07	6.59704	mthfd2
ENSDARG00000093195	19.2856	-2.72281	0.462476	-5.88745	3.92192e-09	2.6077e-07	6.58374	si:dkey-261m9.6
ENSDARG00000100596	32.6401	-2.2973	0.390318	-5.88572	3.96336e-09	2.62264e-07	6.58126	-
ENSDARG00000010516	2816.52	0.940662	0.159874	5.88377	4.01031e-09	2.64107e-07	6.57822	rpl21
ENSDARG00000063914	500.083	-0.922825	0.157031	-5.87669	4.18561e-09	2.74346e-07	6.5617	ND3
ENSDARG00000000551	104.662	1.91426	0.326024	5.87152	4.31821e-09	2.81702e-07	6.55021	slc1a4
ENSDARG00000039302	62.8449	2.47531	0.421977	5.86599	4.46457e-09	2.89883e-07	6.53778	terfa
ENSDARG00000041607	35.0043	2.14163	0.365837	5.85405	4.79755e-09	3.10047e-07	6.50857	eif4ebp3l
ENSDARG00000038713	39.2963	2.46345	0.421478	5.84478	5.07236e-09	3.26283e-07	6.48641	-
ENSDARG00000098850	22.5688	-2.78518	0.477334	-5.83487	5.38336e-09	3.44684e-07	6.46258	-
ENSDARG00000100392	4009.76	1.13657	0.195122	5.82492	5.71408e-09	3.64174e-07	6.43869	-
ENSDARG00000105393	13.7274	-3.16352	0.543323	-5.82254	5.79592e-09	3.67695e-07	6.43451	si:ch1073-159d7.6; zgc:112234
ENSDARG00000086411	51.2697	1.93517	0.332956	5.8121	6.16926e-09	3.89593e-07	6.40939	srsf10b
ENSDARG00000102317	2566.69	0.896863	0.154436	5.80735	6.34688e-09	3.98988e-07	6.39904	rpl26
ENSDARG00000098458	4134.88	1.20602	0.207831	5.80288	6.51847e-09	4.07921e-07	6.38942	zgc:171772
ENSDARG00000005791	1966.96	1.07263	0.184877	5.80185	6.55869e-09	4.08588e-07	6.38871	rpl28
ENSDARG00000100095	143.439	1.22357	0.211039	5.79782	6.71817e-09	4.16647e-07	6.38023	anxa1b
ENSDARG00000012944	99.1662	-2.4408	0.422383	-5.77864	7.53083e-09	4.64962e-07	6.33258	myhz2
ENSDARG00000103129	109.338	1.67535	0.290057	5.77594	7.65227e-09	4.7036e-07	6.32757	-
ENSDARG00000014031	62.9285	2.15372	0.373378	5.7682	8.01208e-09	4.90297e-07	6.30954	abcc2
ENSDARG00000036041	41.6832	2.02414	0.351924	5.75165	8.83787e-09	5.38448e-07	6.26886	f2
ENSDARG00000089963	113.685	-1.25055	0.217491	-5.74992	8.92853e-09	5.41586e-07	6.26633	-
ENSDARG00000017014	138.556	-1.24221	0.216287	-5.74333	9.28311e-09	5.60635e-07	6.25132	ywhae2
ENSDARG00000013804	75.0765	1.62794	0.283516	5.74197	9.35795e-09	5.62698e-07	6.24972	capns1b
ENSDARG00000041051	34.1908	2.06507	0.36037	5.73041	1.00189e-08	5.98436e-07	6.22298	mid1ip1a
ENSDARG00000057353	33.3669	-2.05367	0.358402	-5.73007	1.00388e-08	5.98436e-07	6.22298	-
ENSDARG00000095863	844.867	3.15927	0.553344	5.70942	1.13359e-08	6.72858e-07	6.17208	afp4
ENSDARG00000056078	24.6321	2.46469	0.432439	5.69951	1.20156e-08	7.07129e-07	6.1505	rftn2
ENSDARG00000075014	34.5884	2.24536	0.393947	5.69963	1.20065e-08	7.07129e-07	6.1505	sqstm1
ENSDARG00000039966	23.9756	2.82828	0.496951	5.69126	1.26107e-08	7.39007e-07	6.13135	prom1a
ENSDARG00000030053	392.046	1.6387	0.2886	5.67811	1.36193e-08	7.94746e-07	6.09977	eef1db
ENSDARG00000053875	11.5139	-3.56058	0.628144	-5.66841	1.44131e-08	8.37536e-07	6.077	cryba1b
ENSDARG00000090286	21.339	2.93835	0.518503	5.66699	1.45328e-08	8.40959e-07	6.07523	serpina1
ENSDARG00000052816	124.793	1.63043	0.288672	5.64803	1.62295e-08	9.35223e-07	6.02908	shmt1
ENSDARG00000100558	101.615	-1.54115	0.272907	-5.64717	1.63107e-08	9.36004e-07	6.02872	slbp
ENSDARG00000102946	39.0247	2.29242	0.40635	5.6415	1.68577e-08	9.63396e-07	6.01619	-
ENSDARG00000009018	27.184	2.36051	0.418782	5.63661	1.73428e-08	9.86312e-07	6.00599	rhbg
ENSDARG00000017235	979.623	0.870872	0.154519	5.63603	1.74013e-08	9.86312e-07	6.00599	eif5a
ENSDARG00000027355	10.4712	-3.71567	0.659554	-5.63361	1.7648e-08	9.9621e-07	6.00165	slc25a4
ENSDARG00000090912	87.5549	1.56929	0.279143	5.62183	1.88947e-08	1.06225e-06	5.97377	npc2
ENSDARG00000016200	27.6985	2.44442	0.435026	5.61902	1.92047e-08	1.07531e-06	5.96847	trib3
ENSDARG00000082753	9326.49	-1.69531	0.302321	-5.60766	2.05084e-08	1.14367e-06	5.9417	-
ENSDARG00000099203	43.713	-1.69026	0.302776	-5.58254	2.37034e-08	1.31654e-06	5.88057	atp1b2a
ENSDARG00000008703	35.4371	2.04377	0.366701	5.5734	2.49818e-08	1.38199e-06	5.85949	-
ENSDARG00000015057	32.2349	-2.41766	0.4344	-5.5655	2.61399e-08	1.4403e-06	5.84155	ube2d4
ENSDARG00000037285	7.35927	-3.92909	0.706191	-5.56378	2.63999e-08	1.44885e-06	5.83898	mipa
ENSDARG00000070835	758.96	-1.62263	0.292222	-5.55275	2.81214e-08	1.53723e-06	5.81326	tnnc2
ENSDARG00000069912	20.4961	-2.50999	0.454057	-5.52792	3.24043e-08	1.75746e-06	5.75512	hmga2
ENSDARG00000078882	22.4405	2.81058	0.508415	5.52813	3.23669e-08	1.75746e-06	5.75512	slc22a31
ENSDARG00000100223	70.2835	1.83927	0.333227	5.51957	3.39837e-08	1.83592e-06	5.73615	-
ENSDARG00000037350	1272	0.813913	0.147759	5.50839	3.62121e-08	1.94869e-06	5.71026	rpl9
ENSDARG00000019881	128.183	1.39956	0.254612	5.49685	3.86635e-08	2.07254e-06	5.6835	bsg
ENSDARG00000032637	33.9848	-2.26241	0.412011	-5.49114	3.99359e-08	2.13248e-06	5.67111	si:dkey-261m9.12
ENSDARG00000021059	46.3093	1.8208	0.331687	5.4895	4.03063e-08	2.14398e-06	5.66878	alas1
ENSDARG00000087854	21.8287	-2.35944	0.430088	-5.48595	4.11242e-08	2.17911e-06	5.66172	si:dkey-108k21.13; zgc:112234
ENSDARG00000020008	190.051	-1.27788	0.233817	-5.46527	4.62199e-08	2.4305e-06	5.6143	vcp
ENSDARG00000034203	76.0532	-2.29849	0.420526	-5.46575	4.60945e-08	2.4305e-06	5.6143	zgc:114046; hist1h2ba
ENSDARG00000007955	43.5143	1.85023	0.338926	5.45908	4.78607e-08	2.49569e-06	5.60281	iars
ENSDARG00000010571	90.1797	-1.46847	0.269021	-5.45856	4.8001e-08	2.49569e-06	5.60281	ezh2
ENSDARG00000031774	31.2895	2.39486	0.4387	5.45898	4.78869e-08	2.49569e-06	5.60281	pus7
ENSDARG00000036292	38.5274	2.22618	0.40838	5.45123	5.00215e-08	2.591e-06	5.58653	cdx4
ENSDARG00000009136	64.7032	1.71944	0.316065	5.44016	5.32331e-08	2.74707e-06	5.56113	tp53bp2a
ENSDARG00000077559	41.4122	2.18895	0.403393	5.42635	5.75167e-08	2.95709e-06	5.52914	LOC792958
ENSDARG00000053129	59.2866	1.69754	0.313122	5.42134	5.91535e-08	3.02998e-06	5.51856	carhsp1
ENSDARG00000077492	65.9931	2.18077	0.40237	5.4198	5.96641e-08	3.04485e-06	5.51643	atp8a2
ENSDARG00000053291	1391.5	0.987384	0.182271	5.41712	6.05665e-08	3.07954e-06	5.51151	pnrc2
ENSDARG00000098105	31.1799	2.34198	0.432527	5.41464	6.14105e-08	3.11102e-06	5.5071	tmem106c
ENSDARG00000010946	126.946	1.42816	0.264111	5.40742	6.39389e-08	3.22728e-06	5.49116	cbsb
ENSDARG00000035692	1786.18	0.864875	0.160314	5.39489	6.85661e-08	3.44825e-06	5.4624	rps3a
ENSDARG00000015907	53.3534	1.69542	0.314496	5.39093	7.00951e-08	3.51237e-06	5.4544	dcbld1
ENSDARG00000089039	61.3092	-2.16453	0.402429	-5.37866	7.50414e-08	3.74665e-06	5.42636	zgc:173585
ENSDARG00000015876	20.5157	-2.51755	0.469191	-5.36572	8.06277e-08	4.01109e-06	5.39674	-
ENSDARG00000043446	19.5039	2.5591	0.477537	5.35896	8.37001e-08	4.14901e-06	5.38206	efhd1
ENSDARG00000091902	29.8363	2.01221	0.375642	5.35671	8.47495e-08	4.18602e-06	5.3782	b3gnt2b
ENSDARG00000102417	86.7291	-1.42165	0.265513	-5.35435	8.58659e-08	4.22607e-06	5.37406	psmd7
ENSDARG00000038107	9.67132	-3.27315	0.613487	-5.33533	9.53725e-08	4.67387e-06	5.33032	sgcg
ENSDARG00000088449	142.927	1.57472	0.295177	5.33482	9.56404e-08	4.67387e-06	5.33032	wu:fb55g09
ENSDARG00000027750	30.8215	2.09651	0.394512	5.31419	1.07132e-07	5.21704e-06	5.28258	dpp7
ENSDARG00000069334	12.2284	3.29431	0.620368	5.31025	1.09472e-07	5.31229e-06	5.27472	-
ENSDARG00000061169	115.292	-1.72242	0.325081	-5.29843	1.16801e-07	5.64812e-06	5.2481	larp1b
ENSDARG00000075508	18.0555	-2.70741	0.511982	-5.2881	1.23592e-07	5.95567e-06	5.22507	si:dkey-108k21.10
ENSDARG00000002215	45.4774	-1.64737	0.311892	-5.28186	1.2788e-07	6.1409e-06	5.21177	rtca
ENSDARG00000041108	42.2384	2.139	0.406278	5.26486	1.40293e-07	6.71365e-06	5.17304	ctsh
ENSDARG00000008697	78.5554	1.55822	0.29608	5.26285	1.41839e-07	6.741e-06	5.17128	epas1a
ENSDARG00000103271	26.6925	2.35714	0.44785	5.26324	1.41537e-07	6.741e-06	5.17128	-
ENSDARG00000036629	2876.81	0.808903	0.153768	5.26053	1.43639e-07	6.80319e-06	5.16729	rps14
ENSDARG00000099175	202.837	-1.24231	0.236362	-5.25595	1.47266e-07	6.95116e-06	5.15794	hmgb1a
ENSDARG00000013307	1838.56	0.766431	0.146044	5.24795	1.53799e-07	7.23482e-06	5.14057	rpl19
ENSDARG00000036073	45.4465	1.78477	0.340172	5.24669	1.54857e-07	7.2599e-06	5.13907	cebpg
ENSDARG00000009438	35.2917	2.15911	0.412594	5.23302	1.66764e-07	7.78335e-06	5.10883	myog
ENSDARG00000011201	3927.31	0.740463	0.14152	5.23223	1.67474e-07	7.78335e-06	5.10883	rplp2l
ENSDARG00000016733	63.2442	1.53272	0.292952	5.23197	1.67711e-07	7.78335e-06	5.10883	psat1
ENSDARG00000040492	43.5628	2.14964	0.411095	5.22906	1.70376e-07	7.88058e-06	5.10344	mthfd1b
ENSDARG00000006963	51.9848	-1.64848	0.315538	-5.22436	1.74762e-07	8.02975e-06	5.0953	cse1l
ENSDARG00000080677	6.12536	-3.91616	0.749512	-5.22494	1.74207e-07	8.02975e-06	5.0953	-
ENSDARG00000055475	685.966	1.12176	0.215	5.21749	1.81363e-07	8.30545e-06	5.08064	rps27.2
ENSDARG00000063661	24.1058	2.23409	0.428276	5.21647	1.82367e-07	8.32386e-06	5.07968	nuak2
ENSDARG00000042905	1605.98	1.1777	0.226631	5.19654	2.03033e-07	9.23668e-06	5.03448	rpl10a
ENSDARG00000042010	22.61	2.37734	0.458284	5.18748	2.13164e-07	9.66578e-06	5.01476	-
ENSDARG00000005513	848.192	0.850846	0.164292	5.17885	2.23255e-07	1.00247e-05	4.99893	naca
ENSDARG00000061108	152.666	-1.06596	0.205824	-5.17901	2.23063e-07	1.00247e-05	4.99893	ep300b
ENSDARG00000102995	171.666	1.04224	0.20122	5.17957	2.22392e-07	1.00247e-05	4.99893	rbm24a
ENSDARG00000016496	72.8118	-1.47877	0.285798	-5.1742	2.28891e-07	1.02446e-05	4.98951	cdk8
ENSDARG00000017441	566.054	-1.11198	0.215127	-5.16896	2.35403e-07	1.04404e-05	4.98128	mylz3
ENSDARG00000093584	182.714	1.41241	0.273243	5.16909	2.3524e-07	1.04404e-05	4.98128	zgc:193505
ENSDARG00000104814	35.8468	-3.59498	0.695508	-5.16886	2.35532e-07	1.04404e-05	4.98128	wu:fc46h12
ENSDARG00000038312	44.2624	1.76161	0.341472	5.15887	2.48442e-07	1.09775e-05	4.9595	rcl1
ENSDARG00000074183	18.2029	2.78862	0.540686	5.15756	2.5019e-07	1.10195e-05	4.95784	si:dkey-172j4.3
ENSDARG00000099184	185.11	-1.2539	0.243192	-5.156	2.52275e-07	1.10761e-05	4.95561	map2k6
ENSDARG00000098233	8.85062	-3.42103	0.663874	-5.15313	2.56174e-07	1.12117e-05	4.95033	LOC101886482
ENSDARG00000032317	136.927	-1.14128	0.22193	-5.14252	2.71076e-07	1.18265e-05	4.92715	tox
ENSDARG00000018903	256.526	1.16577	0.227034	5.13477	2.82483e-07	1.22853e-05	4.91061	aimp2
ENSDARG00000086332	38.9532	2.06026	0.401611	5.12998	2.89774e-07	1.25629e-05	4.90091	bri3
ENSDARG00000035910	48.978	-1.53325	0.29898	-5.12828	2.92404e-07	1.26324e-05	4.89851	znf281b
ENSDARG00000103277	9.54553	3.83739	0.748355	5.12776	2.93203e-07	1.26324e-05	4.89851	cyp24a1
ENSDARG00000100833	222.613	2.74372	0.535151	5.12701	2.94388e-07	1.2644e-05	4.89811	LOC100536033
ENSDARG00000014201	16.2101	-2.6606	0.519359	-5.12285	3.00958e-07	1.28464e-05	4.89122	otpa
ENSDARG00000027109	140.678	-1.07558	0.209941	-5.12326	3.00303e-07	1.28464e-05	4.89122	zfr
ENSDARG00000099514	39.7213	-1.86456	0.364278	-5.11851	3.07965e-07	1.31051e-05	4.88256	zgc:112234; si:dkey-23a13.5
ENSDARG00000059001	42.3523	2.6278	0.514419	5.10828	3.25096e-07	1.37917e-05	4.86038	pim2
ENSDARG00000039196	148.637	1.93214	0.378912	5.09917	3.41143e-07	1.44281e-05	4.84079	greb1l
ENSDARG00000075379	9.92877	-3.07269	0.602755	-5.09774	3.43728e-07	1.44932e-05	4.83884	si:dkey-261m9.11
ENSDARG00000076833	48.4421	-1.81947	0.35754	-5.08887	3.60212e-07	1.5142e-05	4.81982	atp1b1b
ENSDARG00000074635	20.9329	-2.443	0.481943	-5.06906	3.99795e-07	1.6755e-05	4.77585	abca1a
ENSDARG00000074955	248.877	1.05201	0.207599	5.06754	4.02993e-07	1.6838e-05	4.77371	nup98
ENSDARG00000100056	8.46446	-3.2492	0.642375	-5.05811	4.2344e-07	1.76391e-05	4.75352	scaf8
ENSDARG00000032725	2929.11	0.839085	0.166019	5.05414	4.32323e-07	1.7955e-05	4.74581	rps27a
ENSDARG00000015355	9.06091	3.59754	0.711963	5.05299	4.34947e-07	1.80099e-05	4.74449	fosl1a
ENSDARG00000044422	20.341	-2.10787	0.417311	-5.05109	4.39294e-07	1.81356e-05	4.74147	acvr2ba
ENSDARG00000052641	188.549	-1.25658	0.249027	-5.04598	4.51202e-07	1.85718e-05	4.73115	kpna3
ENSDARG00000029533	2715.94	1.12865	0.22376	5.044	4.55897e-07	1.87094e-05	4.72794	rpl18
ENSDARG00000070794	50.1371	1.697	0.33669	5.04026	4.649e-07	1.90224e-05	4.72074	greb1
ENSDARG00000076839	30.5987	2.379	0.472259	5.03749	4.71687e-07	1.92431e-05	4.71572	ftr86
ENSDARG00000011170	71.5938	-1.68482	0.33589	-5.01598	5.27632e-07	2.14622e-05	4.66833	ndrg2
ENSDARG00000092798	347.773	1.04064	0.207551	5.01392	5.3333e-07	2.16304e-05	4.66494	ppib
ENSDARG00000015649	63.784	1.6347	0.326467	5.00726	5.52116e-07	2.23268e-05	4.65117	rap2c
ENSDARG00000063535	438.858	-1.37288	0.274584	-4.99985	5.73744e-07	2.31338e-05	4.63575	chd4a
ENSDARG00000052139	52.3253	-1.57758	0.315923	-4.99357	5.92744e-07	2.38304e-05	4.62287	notch3
ENSDARG00000006200	391.732	-0.995995	0.199626	-4.9893	6.05977e-07	2.42918e-05	4.61454	eif4g1a
ENSDARG00000056151	14.4182	-2.91551	0.585257	-4.9816	6.30622e-07	2.52066e-05	4.59848	tyrp1b
ENSDARG00000002347	10.9391	3.28421	0.659485	4.97997	6.35951e-07	2.53464e-05	4.59608	cyp11a1
ENSDARG00000023797	147.956	-1.31726	0.264556	-4.97913	6.38712e-07	2.53833e-05	4.59545	ryr1b
ENSDARG00000013655	77.5504	1.62183	0.326013	4.97476	6.53298e-07	2.58517e-05	4.58751	tpd52l2b
ENSDARG00000099022	2442.87	0.852177	0.17131	4.97448	6.54237e-07	2.58517e-05	4.58751	faua
ENSDARG00000005926	127.734	1.20752	0.24282	4.97289	6.59615e-07	2.59161e-05	4.58643	ak2
ENSDARG00000036427	60.5522	1.43634	0.288832	4.97293	6.59472e-07	2.59161e-05	4.58643	slc3a2a
ENSDARG00000059906	255.918	1.10202	0.221636	4.97218	6.62051e-07	2.59381e-05	4.58606	sdc4
ENSDARG00000035890	54.3206	1.75433	0.353014	4.96959	6.70962e-07	2.61757e-05	4.5821	fuca1.1
ENSDARG00000105414	10.2028	-3.05551	0.614875	-4.96931	6.71901e-07	2.61757e-05	4.5821	zgc:112234; si:ch73-368j24.10
ENSDARG00000036252	25.6908	2.03869	0.411099	4.95913	7.08103e-07	2.74863e-05	4.56088	rras2
ENSDARG00000083699	13.3021	-2.71875	0.548274	-4.95874	7.09517e-07	2.74863e-05	4.56088	-
ENSDARG00000032630	529.612	-1.46844	0.296282	-4.95622	7.18777e-07	2.77673e-05	4.55647	-
ENSDARG00000031907	120.879	1.34967	0.272406	4.95462	7.24713e-07	2.79186e-05	4.55411	ptbp1b
ENSDARG00000102879	93.6413	-1.61073	0.325483	-4.94872	7.47037e-07	2.86987e-05	4.54214	myt1b
ENSDARG00000035095	15.1089	2.66311	0.538275	4.94749	7.51776e-07	2.88007e-05	4.5406	tdgf1
ENSDARG00000009106	247.125	1.38356	0.279931	4.94249	7.71293e-07	2.94668e-05	4.53067	serinc1
ENSDARG00000077467	96.0436	1.38603	0.280493	4.94141	7.75615e-07	2.95503e-05	4.52944	sox10
ENSDARG00000019231	236.702	1.13839	0.230459	4.93967	7.82535e-07	2.9732e-05	4.52678	spna2
ENSDARG00000061052	363.366	-1.11535	0.225981	-4.9356	7.99052e-07	3.02764e-05	4.5189	nipblb
ENSDARG00000033307	59.966	1.62945	0.330857	4.92494	8.43849e-07	3.18864e-05	4.49639	igf2b
ENSDARG00000016706	77.2173	1.26007	0.256046	4.92125	8.59915e-07	3.2405e-05	4.48939	atic
ENSDARG00000022817	9.52036	-3.00215	0.610282	-4.91928	8.6861e-07	3.26437e-05	4.4862	pvalb3
ENSDARG00000014690	1634.16	1.12475	0.228786	4.91616	8.82576e-07	3.30786e-05	4.48045	rps4x
ENSDARG00000077855	16.1483	2.54821	0.518682	4.91286	8.97574e-07	3.35499e-05	4.47431	znrf2a
ENSDARG00000017246	12.4303	-2.77117	0.56415	-4.91212	9.00987e-07	3.35867e-05	4.47383	-
ENSDARG00000058868	89.9762	-1.35829	0.276571	-4.91118	9.05314e-07	3.36572e-05	4.47292	apc
ENSDARG00000041925	11.1958	-2.82703	0.575776	-4.90995	9.10999e-07	3.37778e-05	4.47137	cryba2b
ENSDARG00000012196	12.7518	-2.51013	0.511945	-4.90312	9.43265e-07	3.48806e-05	4.45742	fer
ENSDARG00000105350	4.89337	-3.70464	0.755986	-4.90042	9.56341e-07	3.52699e-05	4.4526	si:ch1073-153i20.4
ENSDARG00000101260	65.4412	1.55596	0.318243	4.88923	1.01233e-06	3.72353e-05	4.42904	gpatch2
ENSDARG00000042826	19.7543	2.59732	0.532064	4.88159	1.05233e-06	3.8502e-05	4.41452	egr2b
ENSDARG00000087697	43.363	-1.69903	0.348034	-4.8818	1.05124e-06	3.8502e-05	4.41452	lpl
ENSDARG00000003607	72.1678	1.40542	0.288152	4.87736	1.07513e-06	3.92323e-05	4.40636	nr2f6a
ENSDARG00000052437	10.892	3.09841	0.635335	4.87681	1.07815e-06	3.92391e-05	4.40628	mia
ENSDARG00000014041	34.5647	-1.8739	0.384459	-4.87411	1.09302e-06	3.95012e-05	4.40339	smarcad1a
ENSDARG00000040725	110.71	1.77878	0.36492	4.87445	1.09114e-06	3.95012e-05	4.40339	zgc:114130
ENSDARG00000042660	199.62	1.13375	0.232615	4.87394	1.09392e-06	3.95012e-05	4.40339	fam32a
ENSDARG00000044684	24.5726	2.2245	0.457831	4.85877	1.18115e-06	4.25398e-05	4.3712	rbp4l
ENSDARG00000021787	74.2041	1.30287	0.268241	4.85711	1.1911e-06	4.27868e-05	4.36869	abcb5
ENSDARG00000035329	195.868	1.09196	0.224983	4.85352	1.2129e-06	4.33448e-05	4.36306	capns1a
ENSDARG00000070545	757.265	-1.00188	0.206414	-4.85373	1.21161e-06	4.33448e-05	4.36306	top1l
ENSDARG00000029150	9785.9	1.20045	0.247388	4.85251	1.21909e-06	4.34537e-05	4.36197	hsp90ab1
ENSDARG00000092947	3868.85	1.06647	0.219829	4.85138	1.22604e-06	4.3589e-05	4.36062	cyt1
ENSDARG00000023151	23.3735	2.00761	0.415175	4.83557	1.32763e-06	4.70797e-05	4.32717	ucp1
ENSDARG00000092035	58.1068	-1.48169	0.30682	-4.82919	1.3709e-06	4.84898e-05	4.31435	si:ch211-156j16.1
ENSDARG00000008034	16.5663	-2.17556	0.45057	-4.82847	1.37585e-06	4.85409e-05	4.31389	skib
ENSDARG00000104682	365.191	1.08085	0.223901	4.82733	1.38375e-06	4.86952e-05	4.31251	tpm2
ENSDARG00000074526	184.761	1.19319	0.247293	4.82503	1.39985e-06	4.9137e-05	4.30859	zbtb16b
ENSDARG00000035694	168.018	1.46317	0.303475	4.82139	1.42565e-06	4.98389e-05	4.30243	stm
ENSDARG00000092155	53.9245	1.39172	0.288667	4.82119	1.42706e-06	4.98389e-05	4.30243	apoc2
ENSDARG00000018985	38.722	2.08806	0.433433	4.8175	1.4537e-06	5.06416e-05	4.29549	gatsl2
ENSDARG00000090309	49.1795	-1.40266	0.292436	-4.79646	1.61497e-06	5.61183e-05	4.2509	ubxn1
ENSDARG00000042684	39.2128	1.81072	0.377736	4.79362	1.63797e-06	5.67749e-05	4.24584	serpinc1
ENSDARG00000019763	25.298	2.20401	0.460334	4.78784	1.68586e-06	5.82886e-05	4.23442	acp5a
ENSDARG00000071015	38.4854	-1.55711	0.325329	-4.78627	1.69912e-06	5.86007e-05	4.2321	pbxip1a
ENSDARG00000054058	138.278	1.44871	0.303318	4.77619	1.78645e-06	6.14592e-05	4.21141	h1fx
ENSDARG00000004078	82.6523	1.24378	0.260477	4.77502	1.79691e-06	6.16656e-05	4.20996	acsl4a
ENSDARG00000055505	10.0658	3.01619	0.632293	4.77024	1.84002e-06	6.29888e-05	4.20074	pdgfaa; LOC103909601
ENSDARG00000030490	44.4966	-1.60242	0.336044	-4.7685	1.85604e-06	6.33802e-05	4.19805	sptb
ENSDARG00000036895	17.7086	2.23735	0.469256	4.76785	1.862e-06	6.34273e-05	4.19772	dap1b
ENSDARG00000077396	5.62032	-3.48729	0.732249	-4.76244	1.91267e-06	6.49125e-05	4.18767	tlcd2
ENSDARG00000101794	33.4037	1.99185	0.418264	4.76219	1.91499e-06	6.49125e-05	4.18767	atp6v0e1
ENSDARG00000004754	38.8256	-1.91105	0.402621	-4.74653	2.06935e-06	6.99732e-05	4.15507	hspa4a
ENSDARG00000007329	21.9105	2.23562	0.471098	4.74555	2.07938e-06	7.00112e-05	4.15483	tbx16
ENSDARG00000077906	43.284	-1.58564	0.33414	-4.74543	2.08059e-06	7.00112e-05	4.15483	rnf165a
ENSDARG00000037190	6.99001	-3.13301	0.660349	-4.74448	2.0904e-06	7.01704e-05	4.15385	-
[truncated: 31,289 more rows]
[truncated: 1 more columns]

## Sheet: Table S5-Cig GO Terms
Category	Term	Count	%	PValue	Genes	List Total	Pop Hits	Pop Total	Fold Enrichment	Bonferroni	Benjamini	FDR
[truncated: 130 more rows]

[truncated: 3 more sheets: Table S6- DMP GO Terms, Table S7- Cig+DMP GO Terms, Table S8-Cig GO Transcripts]
